# Supplementary material for: Deep Learning Paradigm for Precision Lung Cancer Therapy with AI-Driven Genotype-Phenotype Mining and Patient-Derived Organoid Validation
Source: Research Square preprint supplement (doi:10.21203/rs.3.rs-8251435/v1), 2025-12-23
Supplement: Supplementary file 2 [file 728bfd2e2ec6c12d7710a8a2.xlsx]

## Sheet: Sheet1
Supplementary table 2. Compounds and their targets for deep learning model construction
Case	Drug/Therapeutic Targets	EGFR	HER2	HER4	ALK	HGFR (c-Met)	RON	ROS1	NTRK	BRAF V600E	C-met	RET	KRAS G12C	VEGF
1	Gefitinib	√
2	Dacomitinib	√	√	√
3	Tagrisso	√
4	Alecemsa				√
5	Brigatinib				√
6	Crizotinib				√	√	√	√
7	Entrectinib				√			√	√
8	Larotrectinib								√
9	Ensartinib				√
10	Dabrafenib									√
11	Savolitinib										√
12	Selpercatinib											√
13	Vandetanib											√
14	Sotorasib												√
15	Apatinib													√
16	Afatinib	√
17	Erlotinib	√
18	VX702
19	Surufatinib
20	Nilotinib
21	AZD5363
22	Carboplatin
23	Gemcitabine
24	Paclitaxel
