# Supplementary material for: Deep Learning Paradigm for Precision Lung Cancer Therapy with AI-Driven Genotype-Phenotype Mining and Patient-Derived Organoid Validation
Source: Research Square preprint supplement (doi:10.21203/rs.3.rs-8251435/v1), 2025-12-23
Supplement: Supplementary file 2 [file cdc84e9a22528cb258352be3.pdf]

## File checklist

Should you have any questions regarding this checklist, please contact the relevant *Communications* journal.

| Files                                     |                                                                                                  |                                         |                                              |                                                                                                                                                                                                                                                                                                                                                                                                                                                                                                                                                                                                                                                                                                                                                                                                                                                                                                                                                                                                                                                                                                                                                                                                                                                                                                                                                                                |                                     |
|-------------------------------------------|--------------------------------------------------------------------------------------------------|-----------------------------------------|----------------------------------------------|--------------------------------------------------------------------------------------------------------------------------------------------------------------------------------------------------------------------------------------------------------------------------------------------------------------------------------------------------------------------------------------------------------------------------------------------------------------------------------------------------------------------------------------------------------------------------------------------------------------------------------------------------------------------------------------------------------------------------------------------------------------------------------------------------------------------------------------------------------------------------------------------------------------------------------------------------------------------------------------------------------------------------------------------------------------------------------------------------------------------------------------------------------------------------------------------------------------------------------------------------------------------------------------------------------------------------------------------------------------------------------|-------------------------------------|
| Item                                      | Permissible file format                                                                          | File name on manuscript tracking system | File type on manuscript tracking system      | Notes                                                                                                                                                                                                                                                                                                                                                                                                                                                                                                                                                                                                                                                                                                                                                                                                                                                                                                                                                                                                                                                                                                                                                                                                                                                                                                                                                                          |                                     |
| Editorial Requests Table (where relevant) | .doc, .docx                                                                                      | Editorial Requests Table                | Related Manuscript File                      | If you have been sent an Editorial Requests Table with your decision letter, please provide a copy, with all changes made in response to our requests detailed in the right-hand column.                                                                                                                                                                                                                                                                                                                                                                                                                                                                                                                                                                                                                                                                                                                                                                                                                                                                                                                                                                                                                                                                                                                                                                                       | <input type="checkbox"/>            |
| Cover letter (optional)                   | .doc, .docx, .pdf                                                                                | Cover letter                            | Author Cover Letter                          | Outline any additional changes to the manuscript.                                                                                                                                                                                                                                                                                                                                                                                                                                                                                                                                                                                                                                                                                                                                                                                                                                                                                                                                                                                                                                                                                                                                                                                                                                                                                                                              | <input checked="" type="checkbox"/> |
| Author responses                          | .doc, .docx, .pdf                                                                                | Response to Referees                    | Rebuttal Letter                              | Provide your point-by-point response to any issues raised by our reviewers (please include the reviewers' comments in this document).                                                                                                                                                                                                                                                                                                                                                                                                                                                                                                                                                                                                                                                                                                                                                                                                                                                                                                                                                                                                                                                                                                                                                                                                                                          | <input type="checkbox"/>            |
| Article File                              | .doc, .docx, .tex                                                                                | Article File                            | Article (NOT revised manuscript - marked up) | <p>Main manuscript file must be in Microsoft Word or LaTeX format.</p> <p>To ensure the swift production of your article, please ensure that Figures, Schemes, Tables, supplementary files, .bib, .bbl and any other input files for .tex manuscripts that form part of the article content have been uploaded to the peer review system, and that the citations to these items are correctly named/numbered. Missing files or incorrect citations may lead to delays or errors during typesetting.</p> <p>LaTeX and Tex article source files must be accompanied by the compiled PDF for reference.</p>                                                                                                                                                                                                                                                                                                                                                                                                                                                                                                                                                                                                                                                                                                                                                                       | <input checked="" type="checkbox"/> |
| Main Figure/Scheme File(s)                | .psd, .ai, .eps, .tiff, .jpg, .pdf, .ps, .gif, .ppt, .pptx, .png, .bmp, .vsd, .cdx, .svg or .emf | Figure 1, Figure 2, Scheme 1, etc.      | Figure                                       | <p>Each Figure and Scheme must be provided as a separate file at a minimum resolution of 300 dpi at final size. Figures/Schemes must be supplied whole, with all panels included in a single document. They appear at 9 or 18 cm width (1 or 2 columns respectively).</p> <p>Figure/Scheme files must only contain images (no captions, no labels such as "Figure 1", and no page numbers). Figure and Scheme captions must instead be included within the main manuscript file, grouped together at the end of the document.</p> <p>Figures must be in file type .psd, .ai, .eps, .tiff, .jpg, .pdf, .ps, .gif, .ppt, .pptx, .png, .bmp, .vsd, .cdx, .svg or .emf. We recommend using <a href="#">vectographic formats</a> as these lead to higher resolution figures.</p> <p>We strongly discourage the use or adaptation of previously published images (including figures from the literature, stock photos, clip art or commercial satellite and map data), but if this is unavoidable, you must request the necessary rights documentation to re-use such material from the relevant copyright holders and submit this to us alongside your manuscript. An appropriate permissions statement must be present in the relative figure caption for any third-party images.</p> <p>If individuals are identifiable in images, their written permission must be provided.</p> | <input checked="" type="checkbox"/> |
| Main Table(s)                             | .doc, .docx, .tex                                                                                | Included in Article File                | Included in Article                          | <p>Tables must be provided in word-editable format (Word/TeX/Excel/csv), unless scientifically meaningful colours or shading are present, in which case they will be published as a flattened image.</p> <p>Tables should be grouped together at the end of the main manuscript file.</p>                                                                                                                                                                                                                                                                                                                                                                                                                                                                                                                                                                                                                                                                                                                                                                                                                                                                                                                                                                                                                                                                                      | <input checked="" type="checkbox"/> |
| Graphical Abstract (optional)             | .psd, .ai, .eps, .tiff, .jpg, .pdf, .ps, .gif, .ppt, .pptx, .png, .bmp, .vsd, .cdx, .svg or .emf | Graphical Abstract                      | Graphical Abstract                           | To avoid typesetting errors, any graphical abstract should be provided as a separate file only and should not be present in the main manuscript file.                                                                                                                                                                                                                                                                                                                                                                                                                                                                                                                                                                                                                                                                                                                                                                                                                                                                                                                                                                                                                                                                                                                                                                                                                          | <input type="checkbox"/>            |
| Boxes (Reviews/Perspectives only)         | .doc, .docx, .tex                                                                                | Box 1, Box 2, etc.                      | Article                                      | Included in the main Article File in word-editable format, or uploaded as a separate Word or TeX file under the file type 'Article'.                                                                                                                                                                                                                                                                                                                                                                                                                                                                                                                                                                                                                                                                                                                                                                                                                                                                                                                                                                                                                                                                                                                                                                                                                                           | <input type="checkbox"/>            |
| Supplementary Information                 | .pdf                                                                                             | Supplementary Information               | Supplemental Material                        | <p>Any Supplementary Figures, Tables, Methods, Notes, Discussion and References must be provided in a single file in PDF format.</p> <p>Supplementary Information files will be uploaded with the published article as they are submitted with the final version of your manuscript. Any highlighting or tracked changes should be removed from the file.</p>                                                                                                                                                                                                                                                                                                                                                                                                                                                                                                                                                                                                                                                                                                                                                                                                                                                                                                                                                                                                                  | <input checked="" type="checkbox"/> |

| Item                            | Permissible file format                                                                                              | File name on manuscript tracking system                  | File type on manuscript tracking system | Notes                                                                                                                                                                                                                                                                                                                                                                                                                                                                                                                                                                                                                                                                                                                                                                                                                                                                                                                  |                                     |
|---------------------------------|----------------------------------------------------------------------------------------------------------------------|----------------------------------------------------------|-----------------------------------------|------------------------------------------------------------------------------------------------------------------------------------------------------------------------------------------------------------------------------------------------------------------------------------------------------------------------------------------------------------------------------------------------------------------------------------------------------------------------------------------------------------------------------------------------------------------------------------------------------------------------------------------------------------------------------------------------------------------------------------------------------------------------------------------------------------------------------------------------------------------------------------------------------------------------|-------------------------------------|
|                                 |                                                                                                                      |                                                          |                                         | We recommend limiting the size of your Supplementary Information file, and each Supplementary file type listed below, to 50MB.                                                                                                                                                                                                                                                                                                                                                                                                                                                                                                                                                                                                                                                                                                                                                                                         |                                     |
| Supplementary Data              | .csv, .xlsx, .txt, .zip, .cif                                                                                        | Supplementary Data 1, Supplementary Data 2, etc.         | Data Sets                               | Any Supplementary Data files should be supplied separately and should be labelled as Supplementary Data 1, etc. Legends for these should be given in the cover letter or Editorial Requests Table (and not in the main Supplementary Information file).                                                                                                                                                                                                                                                                                                                                                                                                                                                                                                                                                                                                                                                                | <input checked="" type="checkbox"/> |
| Supplementary Audio             | .avi, .mp2, .wav, .mp3                                                                                               | Supplementary Audio 1, Supplementary Audio 2, etc.       | Supplemental Material                   | Any Supplementary Audio files should be supplied separately and should be labelled as Supplementary Audio 1, etc. Legends for these should be given in the cover letter or Editorial Requests Table (and not in the main Supplementary Information file).                                                                                                                                                                                                                                                                                                                                                                                                                                                                                                                                                                                                                                                              | <input type="checkbox"/>            |
| Supplementary Movies            | 3gp, asf, avi, flv, m1v, m2p, m2ts, m2v, m4a, m4v, mov, mp2, mp3, mp4, mpeg, mpg, mts, mxf, ogv, swf, wav, webm, wmv | Supplementary Movie 1, Supplementary Movie 2, etc.       | Video                                   | Any Supplementary Movie files should be supplied separately and should be labelled as Supplementary Movie 1, etc. Legends for these should be given in the cover letter or Editorial Requests Table (and not in the main Supplementary Information file).                                                                                                                                                                                                                                                                                                                                                                                                                                                                                                                                                                                                                                                              | <input type="checkbox"/>            |
| Supplementary Software          | .zip                                                                                                                 | Supplementary Software 1, Supplementary Software 2, etc. | Supplemental Material                   | Any Supplementary Software files should be supplied separately and should be labelled as Supplementary Software 1, etc. Legends for these should be given in the cover letter or Editorial Requests Table (and not in the main Supplementary Information file).<br><br>In order to avoid errors in our production process, Supplementary Software files in .xml or .rar format must instead be supplied as .zip files.                                                                                                                                                                                                                                                                                                                                                                                                                                                                                                 | <input type="checkbox"/>            |
| Life sciences reporting summary | .pdf                                                                                                                 | Reporting Summary                                        | Supplemental Material                   | For life science manuscripts, a final completed version of the life sciences reporting summary must be supplied.<br><a href="https://www.nature.com/documents/nr-reporting-summary.pdf">https://www.nature.com/documents/nr-reporting-summary.pdf</a><br><br>The reporting summary will be published alongside your manuscript and therefore it needs to accurately represent your work. Please take a close look at the reporting summary and make sure that everything is completed correctly. In the section "Reporting for specific materials, systems and methods", you need to tick a box for each item, according to whether or not it applies, which will result in irrelevant sections becoming hidden. In the subsequent sections no box should be left blank or completed as N/A, including when the response is negative. Also, please make sure to include your name and date at the top of the document. | <input type="checkbox"/>            |
| Solar cells reporting summary   | .pdf                                                                                                                 | Solar cells reporting summary                            | Supplemental Material                   | For solar cell manuscripts, a final completed version of the solar cells reporting summary must be supplied.<br><a href="https://www.nature.com/documents/nr-photovoltaic-reporting.pdf">https://www.nature.com/documents/nr-photovoltaic-reporting.pdf</a>                                                                                                                                                                                                                                                                                                                                                                                                                                                                                                                                                                                                                                                            | <input type="checkbox"/>            |
| Lasing reporting summary        | .pdf                                                                                                                 | Lasing reporting summary                                 | Supplemental Material                   | For lasing manuscripts, a final completed version of the lasing reporting summary must be supplied.<br><a href="https://www.nature.com/documents/nr-lasing-reporting.pdf">https://www.nature.com/documents/nr-lasing-reporting.pdf</a>                                                                                                                                                                                                                                                                                                                                                                                                                                                                                                                                                                                                                                                                                 | <input type="checkbox"/>            |
| Editorial policy checklist      | .pdf                                                                                                                 | Editorial policy checklist                               | Related Manuscript File                 | For all primary research articles, a final completed version of the editorial policy checklist should be supplied.<br><a href="https://www.nature.com/documents/nr-editorial-policy-checklist.zip">https://www.nature.com/documents/nr-editorial-policy-checklist.zip</a><br>Please note that this form is a dynamic 'smart pdf' and must therefore be downloaded and completed in Adobe Reader. Clicking this link will download a zip file containing the pdf.                                                                                                                                                                                                                                                                                                                                                                                                                                                       | <input checked="" type="checkbox"/> |
| Suggested featured image        | .jpg, .pdf, .gif, .tiff, .psd                                                                                        | Featured image                                           | Related Manuscript File                 | If you wish, you may supply an interesting image (but not an illustration or schematic) for consideration as a 'Featured Image' on the journal homepage. The file should be 1200x675 pixels in RGB format and should be uploaded as 'Related Manuscript File'. In addition to our home page, we may also use this image (with credit) in other journal-specific promotional material. If you submit a suggested featured image, please also include a completed <a href="#">image License to Publish form</a> (also upload as 'Related Manuscript File', with file name 'Featured image LTP').                                                                                                                                                                                                                                                                                                                         | <input type="checkbox"/>            |
