# Supplementary material for: Deep Learning Paradigm for Precision Lung Cancer Therapy with AI-Driven Genotype-Phenotype Mining and Patient-Derived Organoid Validation
Source: Research Square preprint supplement (doi:10.21203/rs.3.rs-8251435/v1), 2025-12-23
Supplement: Supplementary file 3 [file 7ba590e175d55473bbbce996.xlsx]

## Sheet: All
NAME	Index	DrugBank ID	Vina Affinity	CNNscore	CNNaffinity	MW	pangu_affinity	Vina Affinity_id	CNNscore_id	CNNaffinity_id	pangu_id	rank_prod_id	with_pangu_id	without_pandu	without_pandu_id	Description	Target
N-[4-(3-BROMO-PHENYLAMINO)-QUINAZOLIN-6-YL]-ACRYLAMIDE	0	DB07662	-6.91847	0.52026	6.19344	369.222	8.69636	1580	1932	901	1	229.006	48	1401.08	1393	NA	SRC,EGFR
Erlotinib	6	DB00530	-5.66489	0.55875	6.42683	393.443	7.95659	3073	1677	552	2	274.642	70	1416.92	1422	Erlotinib is an inhibitor of the epidermal growth factor receptor (EGFR) tyrosine kinase that is used in the treatment of non-small cell lung cancer, pancreatic cancer and several other types of cancer. It is typically marketed under the trade name Tarceva. Erlotinib binds to the epidermal growth factor receptor (EGFR) tyrosine kinase in a reversible fashion at the adenosine triphosphate (ATP) bi…	EGFR,NR1I2
Lapatinib	0	DB01259	-7.83436	0.20771	6.81998	581.069	7.92537	534	4004	159	3	178.706	33	697.928	484	Lapatinib is an anti-cancer drug developed by GlaxoSmithKline (GSK) as a treatment for solid tumours such as breast and lung cancer. It was approved by the FDA on March 13, 2007, for use in patients with advanced metastatic breast cancer in conjunction with the chemotherapy drug Capecitabine. Lapatinib is human epidermal growth factor receptor type 2 (HER2/ERBB2) and epidermal growth factor recep…	EGFR,ERBB2
Gefitinib	2	DB00317	-7.18116	0.66252	6.77179	446.91	7.72723	1200	993	193	4	174.155	32	612.674	395	Gefitinib (originally coded ZD1839) is a drug used in the treatment of certain types of cancer. Acting in a similar manner to erlotinib (marketed as Tarceva), gefitinib selectively targets the mutant proteins in malignant cells. It is marketed by AstraZeneca under the trade name Iressa.	EGFR
Methylamine	4	DB01828	-1.29864	0.76006	2.64106	31.058	7.7249	4496	476	4487	5	468.101	183	2125.51	2517	NA	amtB
(2E)-N-{4-[(3-bromophenyl)amino]quinazolin-6-yl}-4-(dimethylamino)but-2-enamide	3	DB08564	-6.26626	0.68903	6.66104	426.318	7.70067	2453	853	277	6	242.84	53	833.762	641	NA	SRC
4-[3-Methylsulfanylanilino]-6,7-Dimethoxyquinazoline	0	DB02984	-6.89639	0.94129	6.49972	327.409	7.60809	1615	29	454	7	110.454	14	277.04	104	NA	MAPK14
Purvalanol	7	DB02733	-6.62058	0.88024	6.75262	432.912	7.44939	2007	128	202	8	142.741	22	372.995	169	NA	CRK2,CDK4,MAPK1,MAPK3,CDK2,SRPK2
Methylethylamine	4	DB02396	-1.89102	0.59424	2.74731	59.112	7.44535	4489	1421	4479	9	712.101	415	3057.09	3809	NA	MB
Ethanolamine	0	DB03994	-2.49057	0.60318	2.75456	61.084	7.37022	4454	1351	4478	10	720.481	423	2997.99	3740	A viscous, hygroscopic amino alcohol with an ammoniacal odor. It is widely distributed in biological tissue and is a component of lecithin. It is used as a surfactant, fluorimetric reagent, and to remove CO2 and H2S from natural gas and other gases.	nspA,ANXA3
7-Hydroxystaurosporine	0	DB01933	-10.318	0.17214	6.29412	482.54	7.36516	4	4154	742	11	107.915	12	231.017	74	NA	PDPK1
Ethanol	6	DB00898	-1.72023	0.8797	2.7828	46.069	7.25657	4492	129	4472	12	419.931	148	1373.55	1343	A clear, colorless liquid rapidly absorbed from the gastrointestinal tract and distributed throughout the body. It has bactericidal activity and is used often as a topical disinfectant. It is widely used as a solvent and preservative in pharmaceutical preparations as well as serving as the primary ingredient in alcoholic beverages.	GABRA1,GRIN3A,GLRA1,GLRA2,ADH1A,ADH1B,ADH1C
4-[3-Hydroxyanilino]-6,7-Dimethoxyquinazoline	1	DB03365	-7.0112	0.93757	6.44636	297.314	7.17632	1438	36	522	13	136.905	18	300.085	118	NA	CDK2
3-[3-chloro-5-(5-{[(1S)-1-phenylethyl]amino}isoxazolo[5,4-c]pyridin-3-yl)phenyl]propan-1-ol	1	DB06897	-7.42273	0.90504	7.16785	407.901	7.17029	923	86	31	14	76.6121	7	135.006	32	NA	PLK1
Pipecuronium	2	DB01338	-7.94078	0.21838	7.1216	602.905	7.15605	461	3961	41	15	183.061	36	421.467	211	Pipecuronium is a piperazinyl androstane derivative which is a non-depolarizing neuromuscular blocking agent.	CHRNA2,CHRM2,CHRM3
3-({3-[(1S,4aS,6S,7S,9S,9aR)-1,6-dimethyl-2-oxodecahydro-6,9-epoxy-4a,7-methanobenzo[7]annulen-1-yl]propanoyl}amino)-2,4-dihydroxybenzoic-acid	4	DB08366	-8.91548	0.16452	5.78089	443.496	7.1533	79	4191	1726	16	309.226	86	829.842	636	NA	fabF
Betazole	0	DB00272	-3.87227	0.81164	3.38169	111.148	7.15139	4172	297	4229	17	546.32	244	1736.92	1899	A histamine H2 agonist used clinically to test gastric secretory function.	HRH2
3-[3-(3-methyl-6-{[(1S)-1-phenylethyl]amino}-1H-pyrazolo[4,3-c]pyridin-1-yl)phenyl]propanamide	0	DB06963	-7.9476	0.91995	7.40842	399.498	7.13789	457	66	7	18	44.1527	3	59.546	8	NA	PLK1
(2R)-3-{[(4Z)-5,6-DIPHENYL-6,7-DIHYDRO-4H-PYRROLO[2,3-D]PYRIMIDIN-4-YLIDENE]AMINO}PROPANE-1,2-DIOL	0	DB07648	-7.7656	0.20669	5.80511	360.417	7.08	594	4007	1682	19	525.166	221	1587.85	1689	NA	CHEK1
Fomepizole	1	DB01213	-3.09282	0.86611	3.56074	82.106	7.07133	4375	158	4102	20	487.995	199	1415.39	1421	Fomepizole is used as an antidote in confirmed or suspected methanol or ethylene glycol poisoning. Fomepizole is a competitive inhibitor of alcohol dehydrogenase, the enzyme that catalyzes the initial steps in the metabolism of ethylene glycol and methanol to their toxic metabolites.	ADH1A,ADH1B,ADH1C,CAT
Cysteamine	2	DB00847	-2.06869	0.84459	2.76785	77.152	7.05323	4484	209	4476	21	544.791	242	1612.75	1727	Cysteamine is a radiation-protective agent that oxidizes in air to form cystamine. It can be given intravenously or orally to treat radiation sickness. The bitartrate and hydrochloride salt forms are indicated for the treatment of neuropathic cystinosis in patients 6 years old and older. Cysteamine is marketed under several brand names such as Cystaran, Procysbi, and Cystagon.	Not-Available,SST,NPY2R
N-Aminoethylmorpholine	8	DB03096	-3.38028	0.60487	3.73736	130.191	7.05049	4315	1340	3974	22	843.207	562	2842.96	3555	NA	CTSD
PLATENSIMYCIN	1	DB08407	-9.25712	0.15751	5.42951	441.48	7.04856	42	4219	2350	23	312.834	91	746.751	538	NA	fabF
2-Methoxyethanol	8	DB02806	-2.15655	0.8872	3.0575	76.095	7.03667	4479	116	4378	24	483.372	192	1315.14	1273	NA	NA
Piperazine	5	DB00592	-2.61814	0.5764	3.0749	86.138	7.03444	4441	1543	4372	25	930.286	665	3105.82	3870	Piperazine is an organic compound that consists of a six-membered ring containing two opposing nitrogen atoms. First used as a solvent for uric acid, the use of piperazine as an anthelmintic agent was first introduced in 1953. Upon entry into the systemic circulation, the drug is partly oxidized and partly eliminated as an unchanged compound. Outside the body, piperazine has a remarkable power to…	GABRB3
(2S)-2-({6-[(3-AMINO-5-CHLOROPHENYL)AMINO]-9-ISOPROPYL-9H-PURIN-2-YL}AMINO)-3-METHYLBUTAN-1-OL	5	DB07379	-6.84263	0.12924	6.26901	403.918	7.01667	1688	4322	781	26	620.398	317	1786.09	1984	NA	CDK6,72
Urea	0	DB03904	-2.2716	0.71698	2.65893	60.056	7.01631	4477	699	4484	27	784.555	502	2412	2943	A compound formed in the liver from ammonia produced by the deamination of amino acids. It is the principal end product of protein catabolism and constitutes about one half of the total urinary solids.	ARG1,CA2,Not-Available,CTNNB1,yedY,folA
2-Amino-6-Chloropyrazine	0	DB02297	-3.75256	0.89679	3.86761	129.55	7.01536	4213	100	3904	28	463.249	176	1180.41	1064	NA	CDK2
Sorafenib	6	DB00398	-7.23564	0.15539	5.93113	464.831	7.01278	1131	4231	1440	29	668.6	365	1902.93	2166	"Sorafenib (rINN), marketed as Nexavar by Bayer, is a drug approved for the treatment of advanced renal cell carcinoma (primary kidney cancer). It has also received ""Fast Track"" designation by the FDA for the treatment of advanced hepatocellular carcinoma (primary liver cancer), and has since performed well in Phase III trials.	BRAF,RAF1,KDR,FLT4,FLT3,PDGFRB,KIT
1-Methylcytosine	2	DB04314	-4.04624	0.86458	4.04409	125.131	7.01074	4112	164	3778	30	525.799	222	1365.8	1332	NA	PAPS
L-Serine	0	DB00133	-3.3032	0.7521	3.26378	105.093	7.00917	4328	512	4295	31	737.005	446	2119.21	2504	A non-essential amino acid occurring in natural form as the L-isomer. It is synthesized from glycine or threonine. It is involved in the biosynthesis of purines; pyrimidines; and other amino acids.	CBS,SDS,SRR,SPTLC2,SPTLC1,SARS,AGXT
Adenine	0	DB00173	-4.23777	0.81617	4.03088	135.13	7.00718	4027	274	3787	32	604.706	294	1610.68	1723	A purine base and a fundamental unit of adenine nucleotides.	Not-Available,MTAP,cobT,APRT,mtnN,ACACB,ACP1,PECR,mutY,ptd,SRPK2,ruvB
(6,7-Difluoro-Quinazolin-4-Yl)-(1-Methyl-2,2-Diphenyl-Ethyl)-Amine	1	DB03678	-7.75026	0.39561	6.66034	375.422	6.99757	607	2854	278	33	355.059	110	783.843	577	NA	NA
Glycinamid	2	DB03636	-2.74524	0.74481	3.07808	74.083	6.99736	4427	553	4369	34	776.558	491	2203.29	2644	NA	MMP8
L-Valinol	2	DB04383	-3.67723	0.41916	3.26737	103.165	6.98075	4235	2699	4291	35	1144.64	999	3660.48	4357	NA	Not-Available
2-Aminothiazoline	0	DB02335	-2.93138	0.90627	3.4345	102.162	6.94419	4403	82	4191	36	483.11	191	1148.05	1015	NA	NOS3
6-Methylpurine	0	DB02113	-4.26787	0.84417	4.01459	134.142	6.94009	4016	212	3798	37	588.128	283	1478.75	1506	NA	deoD
2-({5-CHLORO-2-[(2-METHOXY-4-MORPHOLIN-4-YLPHENYL)AMINO]PYRIMIDIN-4-YL}AMINO)-N-METHYLBENZAMIDE	5	DB07460	-6.95292	0.85023	7.46643	468.945	6.93914	1535	193	5	38	86.6173	10	113.993	21	NA	PTK2
Novobiocin	1	DB01051	-8.18262	0.2272	6.3762	612.632	6.92937	315	3919	623	39	416.159	146	916.202	755	Novobiocin is an antibiotic compound derived from _Streptomyces niveus_. It has a chemical structure similar to coumarin. Novobiocin binds to DNA gyrase, and blocks adenosine triphosphatase (ATPase) activity. (From Reynolds, Martindale The Extra Pharmacopoeia, 30th ed, p189) [PubChem]	gyrB
4-[[2-[[4-chloro-3-(trifluoromethyl)phenyl]amino]-3H-benzimidazol-5-yl]oxy]-N-methyl-pyridine-2-carboxamide	4	DB06938	-7.89822	0.63797	6.97017	461.831	6.92648	492	1124	81	40	205.74	39	355.145	155	NA	KDR
Putrescine	0	DB01917	-3.32684	0.66871	3.4771	88.154	6.92633	4320	958	4167	41	916.989	647	2583.59	3192	Putrescine is a toxic diamine formed by putrefaction from the decarboxylation of arginine and ornithine. Putrescine is a solid. This compound belongs to the polyamines. These are compounds containing more than one amine group. Known drug targets of putrescine include putrescine-binding periplasmic protein, ornithine decarboxylase, and S-adenosylmethionine decarboxylase proenzyme.	ODC1,AMD1,potF
N-(4-PHENYLAMINO-QUINAZOLIN-6-YL)-ACRYLAMIDE	2	DB08462	-6.19663	0.66494	6.13882	290.326	6.91992	2534	979	1006	42	568.996	267	1356.42	1319	NA	SRC
Hydroxyurea	5	DB01005	-2.6308	0.52379	2.9343	76.055	6.91944	4439	1908	4426	43	1126.77	975	3346.76	4104	An antineoplastic agent that inhibits DNA synthesis through the inhibition of ribonucleoside diphosphate reductase.	RRM1
1-Proponol	8	DB03175	-2.12032	0.81296	2.88878	60.096	6.91751	4482	293	4443	44	711.815	413	1800.27	2009	A colorless liquid made by oxidation of aliphatic hydrocarbons that is used as a solvent and chemical intermediate.	LYZ
(2s)-Pyrrolidin-2-Ylmethylamine	2	DB03253	-3.44125	0.57042	3.51603	100.165	6.90671	4300	1596	4127	45	1062.52	874	3048.21	3795	NA	DPP4
1,3-Propandiol	0	DB02774	-2.86956	0.60593	2.8028	76.095	6.8996	4412	1329	4466	46	1047.63	845	2969.57	3705	NA	ARF1,linB
Pancuronium	0	DB01337	-8.85882	0.47858	7.47459	572.875	6.89742	97	2264	4	47	80.1589	8	95.7714	15	A bis-quaternary steroid that is a competitive nicotinic antagonist. As a neuromuscular blocking agent it is more potent than curare but has less effect on the circulatory system and on histamine release.	CHRNA2,CHRM2,CHRM3
6-(2,6-DICHLOROPHENYL)-2-{[3-(HYDROXYMETHYL)PHENYL]AMINO}-8-METHYLPYRIDO[2,3-D]PYRIMIDIN-7(8H)-ONE	0	DB08339	-8.90243	0.96927	7.31049	427.291	6.88884	82	4	16	48	22.4031	1	17.3779	1	NA	ABL1
R-1,2-Propanediol	2	DB02159	-2.86722	0.59852	2.81724	76.095	6.88854	4413	1390	4461	49	1076.08	900	3013.42	3762	A clear, colorless, viscous organic solvent and diluent used in pharmaceutical preparations.	icd
Hydralazine	1	DB01275	-5.60846	0.81378	4.43517	160.18	6.88599	3125	289	3461	50	628.753	327	1462.12	1491	A direct-acting vasodilator that is used as an antihypertensive agent.	AOC3,P4HA1
Butylamine	9	DB03659	-2.33544	0.57887	3.19395	73.139	6.88021	4471	1526	4329	51	1107.85	948	3091.12	3851	Butylamine is a colourless liquid which acquires a yellow colour upon storage in air. It is one of the four isomeric amines of butane. It is known to have the fishy, ammonia-like odor common to amines.	SAP2
Glycine	2	DB00145	-2.75522	0.73577	2.93138	75.067	6.83281	4426	602	4427	52	884.973	609	2276.35	2764	A non-essential amino acid. It is found primarily in gelatin and silk fibroin and used therapeutically as a nutrient. It is also a fast inhibitory neurotransmitter.	GRIN2C,Not-Available,SHMT2,DKFZp686P09201,GLYAT,SLC36A1,SHMT2,GLYATL2,GLYATL1,AGXT2,GCAT,SLC32A1,PIPOX,SLC6A5,GRIN3B,GLDC,SLC6A9,GLRA1,AGXT,GLRB,SHMT1,ALAS1,GLRA3,GLRA2,GNMT,SHMT2,GATM,ALAS2,GCSH,GARS,GRIN2A,BAAT,GPR18,GSS
Beta-Alanine	0	DB03107	-3.22494	0.66593	2.66778	89.094	6.83123	4341	977	4483	53	1001.92	772	2669.02	3329	An amino acid formed in vivo by the degradation of dihydrouracil and carnosine. Since neuronal uptake and neuronal receptor sensitivity to beta-alanine have been demonstrated, the compound may be a false transmitter replacing GAMMA-AMINOBUTYRIC ACID. A rare genetic disorder, hyper-beta-alaninemia, has been reported. [PubChem]	panC
Fusidic-Acid	0	DB02703	-9.38489	0.46508	6.94212	516.719	6.82616	28	2361	100	54	137.455	19	187.68	53	An antibiotic isolated from the fermentation broth of Fusidium coccineum. (From Merck Index, 11th ed) It acts by inhibiting translocation during protein synthesis. It is often used topically in creams and eyedrops but is available in systemic formulations including tablets and injections.	fusA,cat,cat3
6,7-DIMETHOXY-4-[(3R)-3-(QUINOXALIN-2-YLOXY)PYRROLIDIN-1-YL]QUINAZOLINE	2	DB08391	-7.18456	0.17025	6.16055	403.442	6.82519	1194	4164	964	55	716.537	419	1686.03	1827	NA	PDE10A
Pyrazole	0	DB02757	-2.6429	0.87526	3.33559	68.079	6.81872	4434	140	4242	56	619.684	316	1380.91	1357	NA	ADH1C
4-[5-[2-(1-Phenyl-Ethylamino)-Pyrimidin-4-Yl]-1-Methyl-4-(3-Trifluoromethylphenyl)-1h-Imidazol-2-Yl]-Piperidine	0	DB01761	-8.88542	0.29706	7.23537	506.576	6.81693	89	3522	24	57	143.902	23	195.943	56	NA	MAPK14
D-Serine	0	DB03929	-3.31544	0.75355	3.26404	105.093	6.80986	4324	508	4294	58	860.023	585	2112.86	2493	A non-essential amino acid occurring in natural form as the L-isomer. It is synthesized from GLYCINE or THREONINE. It is involved in the biosynthesis of PURINES; PYRIMIDINES; and other amino acids. [PubChem]	GLRA1,GRIN1,SERPINB3,shp
Vecuronium	0	DB01339	-8.75686	0.48163	7.4631	557.84	6.79795	114	2234	6	59	97.4424	11	115.181	22	Monoquaternary homolog of pancuronium. A non-depolarizing neuromuscular blocking agent with shorter duration of action than pancuronium. Its lack of significant cardiovascular effects and lack of dependence on good kidney function for elimination as well as its short duration of action and easy reversibility provide advantages over, or alternatives to, other established neuromuscular blocking age…	CHRNA2
Saprisartan	0	DB01347	-8.37177	0.1237	6.64311	611.44	6.7952	245	4343	293	60	369.823	114	678.07	469	Saprisartan is an AT1 receptor antagonist. It is based on medications of losartan's prototypical chemical structure. The mode of (functional) AT1 receptor antagonism has been characterized as insurmountable/noncompetitive for saprisartan. It is very likely that slow dissociation kinetics from the AT1 receptor underlie insurmountable antagonism [A14009].	AGTR1
Ethyl-carbamate	4	DB04827	-2.59011	0.77888	3.31268	89.094	6.79077	4444	407	4259	61	827.945	545	1974.96	2281	Urethane, formerly marketed as an inactive ingredient in Profenil injection, was determined to be carcinogenic and was removed from the Canadian, US, and UK markets in 1963.	NA
5-[5,6-BIS(METHYLOXY)-1H-BENZIMIDAZOL-1-YL]-3-{[1-(2-CHLOROPHENYL)ETHYL]OXY}-2-THIOPHENECARBOXAMIDE	2	DB07471	-7.07139	0.6563	7.15377	457.939	6.79021	1341	1022	35	62	233.526	51	363.342	160	NA	CCNA2,CDK2
2-Ethoxyethanol	1	DB02249	-2.8631	0.70037	3.13008	90.122	6.78773	4414	782	4349	63	986.148	760	2466.85	3025	NA	ADH1C
4-Hydroxybutan-1-Aminium	0	DB02541	-3.32269	0.64873	3.22327	90.146	6.78716	4322	1065	4317	64	1061.94	871	2708.56	3390	NA	PRSS3
Alpha-Aminobutyric-Acid	7	DB04454	-3.31286	0.55801	3.13341	103.121	6.78031	4326	1683	4347	65	1197.62	1069	3163.15	3925	NA	EGF,mrsA,GATM,gag-pol
Gamma(Amino)-Butyric-Acid	0	DB02530	-3.65956	0.58912	3.26464	103.121	6.77722	4244	1451	4293	66	1149.31	1004	2978.98	3719	The most common inhibitory neurotransmitter in the central nervous system.	GATM
2,4-Diaminobutyric-Acid	1	DB03817	-3.75903	0.48415	2.80322	118.136	6.77561	4210	2210	4465	67	1291.64	1226	3463.37	4214	NA	Not-Available,env
(1R,3R)-5-[(2E)-3-{(1S,3R)-2,2,3-trimethyl-3-[6,6,6-trifluoro-5-hydroxy-5-(trifluoromethyl)hex-3-yn-1-yl]cyclopentyl}prop-2-en-1-ylidene]cyclohexane-1,3-diol	0	DB07530	-8.77876	0.26873	6.64025	482.505	6.7719	109	3700	295	68	299.909	79	491.832	276	NA	NCOA1,VDR
Reserpine	1	DB00206	-7.44887	0.14539	6.53244	608.688	6.77121	890	4269	409	69	572.232	269	1158.28	1028	An alkaloid found in the roots of Rauwolfia serpentina and R. vomitoria. Reserpine inhibits the uptake of norepinephrine into storage vesicles resulting in depletion of catecholamines and serotonin from central and peripheral axon terminals. It has been used as an antihypertensive and an antipsychotic as well as a research tool, but its adverse effects limit its clinical use.	SLC18A2
Nitrosoethane	0	DB02646	-2.35889	0.84158	2.94206	59.068	6.75757	4468	215	4424	70	738.527	449	1619.78	1740	NA	MB
Glycerol	5	DB09462	-2.90485	0.75251	2.9595	92.094	6.75546	4407	509	4417	71	915.823	644	2147.81	2562	A trihydroxy sugar alcohol that is an intermediate in carbohydrate and lipid metabolism.	NA
N-[(5R,14R)-5-AMINO-5,14-DIMETHYL-4-OXO-3-OXA-18-AZATRICYCLO[15	2	DB07019	-7.5325	0.30069	6.12798	459.612	6.75145	805	3499	1029	72	675.884	376	1425.78	1433	NA	BACE1
Beta-Mercaptoethanol	6	DB03345	-1.8449	0.86964	3.10915	78.136	6.74269	4490	151	4356	73	681.41	379	1434.73	1446	NA	HP_0602,E,GLO1,PNPO,gfo,SERPINA1,LGALS1,ninB,SCMH1,pdxH
L-Homoserine	3	DB04193	-3.53289	0.49624	3.20471	119.12	6.7389	4279	2119	4324	74	1305.11	1251	3397.19	4155	NA	NA
2-(3-BROMOPHENYL)-6-[(2-HYDROXYETHYL)AMINO]-1H-BENZO[DE]ISOQUINOLINE-1,3(2H)-DIONE	1	DB08701	-7.79022	0.81908	6.5845	411.255	6.73802	571	264	352	75	251.166	59	375.775	174	NA	Not-Available,Not-Available
6-({5-fluoro-2-[(3,4,5-trimethoxyphenyl)amino]pyrimidin-4-yl}amino)-2,2-dimethyl-2H-pyrido[3,2-b][1,4]oxazin-3(4H)-one	5	DB07159	-7.15057	0.08004	6.32254	470.461	6.73796	1236	4445	696	76	734.223	441	1563.75	1650	NA	SYK
1-{3-[(4-pyridin-2-ylpiperazin-1-yl)sulfonyl]phenyl}-3-(1,3-thiazol-2-yl)urea	4	DB07817	-6.81121	0.19986	6.12019	444.542	6.73475	1744	4044	1047	77	868.358	595	1947.31	2246	NA	pheS,pheT
5-(Aminomethyl)-2-Methylpyrimidin-4-Amine	0	DB03204	-4.35085	0.81571	4.13051	138.174	6.73188	3970	278	3720	78	752.26	469	1601.25	1705	NA	NA
Rocuronium	4	DB00728	-8.50954	0.69074	7.6129	529.786	6.73177	196	845	2	79	71.5225	6	69.1907	12	Rocuronium (rapid onset-curonium) is a desacetoxy analogue of vecuronium with a more rapid onset of action. It is an aminosteroid non-depolarizing neuromuscular blocker or muscle relaxant used in modern anaesthesia, to facilitate endotracheal intubation and to provide skeletal muscle relaxation during surgery or mechanical ventilation. Introduced in 1994, rocuronium has rapid onset, and intermedi…	CHRNA2,CHRM2,HTR3A
(3R,4S)-1-[6-(6-METHOXYPYRIDIN-3-YL)PYRIMIDIN-4-YL]-4-(2,4,5-TRIFLUOROPHENYL)PYRROLIDIN-3-AMINE	2	DB08445	-7.97589	0.2743	6.54747	401.392	6.72946	441	3657	395	80	475.13	186	860.439	676	NA	DPP4
2-Aminoethanesulfonic-Acid	1	DB01956	-3.15838	0.5757	2.95883	125.149	6.72863	4359	1553	4418	81	1247.58	1151	3104.05	3867	Taurine, whose chemical name is 2-aminoethanesulfonic acid, is one of the most abundant amino acids in several organs. It plays important role in essential biological processes.[A31396] This conditional amino acid can be either be manufactured by the body or obtained in the diet mainly by the consumption of fish and meat.[L1058] The supplements containing taurine were FDA approved by 1984 and the…	tauD,cbh
Deserpidine	3	DB01089	-7.44669	0.14001	6.44264	578.662	6.72404	896	4291	528	82	638.747	342	1266.19	1196	Deserpidine is an ester alkaloid drug isolated from Rauwolfia canescens (family Apocynaceae) with antipsychotic and antihypertensive properties that has been used for the control of high blood pressure and for the relief of psychotic behavior.	SLC18A2
(2R)-2-{[4-(benzylamino)-8-(1-methylethyl)pyrazolo[1,5-a][1,3,5]triazin-2-yl]amino}butan-1-ol	6	DB08285	-6.33514	0.88262	6.55217	354.458	6.72259	2366	123	393	83	312.139	90	485.405	269	NA	CDK2,CCNA2
S-1,2-Propanediol	0	DB04349	-2.98405	0.62622	2.67342	76.095	6.72035	4399	1202	4482	84	1187.82	1054	2872.39	3583	A clear, colorless, viscous organic solvent and diluent used in pharmaceutical preparations.	icd,rsbQ
4-Amino-5-Hydroxymethyl-2-Methylpyrimidine	0	DB02022	-4.29078	0.83903	3.98402	139.158	6.71922	4006	223	3821	85	733.927	440	1505.67	1553	NA	tenA,thiD
F-Loop-of-Vitamin-B12	7	DB02576	-2.48418	0.72051	2.97497	76.119	6.71903	4455	672	4411	86	1032.32	820	2363.66	2871	NA	mamA
N6-METHYL-(R)-ROSCOVITINE,-R-2-[6-(BENZYL-METHYL-AMINO)-9-ISOPROPYL-9H-PURIN-2-YLAMINO]-BUTAN-1-OL	6	DB04776	-5.94585	0.2407	5.91981	368.485	6.71637	2808	3849	1468	87	1083.92	915	2512.79	3091	NA	PDXK
1,3-Butanediol	1	DB02202	-3.1051	0.71326	2.84624	90.122	6.713	4369	719	4453	88	1053.32	856	2409.47	2939	NA	NA
Myxothiazol	3	DB04741	-6.48436	0.66125	6.94153	487.691	6.7101	2182	1002	101	89	374.42	117	604.433	388	NA	UQCRC1
Dasatinib	1	DB01254	-7.51169	0.58818	6.726	488.017	6.70153	824	1466	221	90	393.708	131	643.899	424	Dasatinib is an oral dual BCR/ABL and Src family tyrosine kinase inhibitor approved for use in patients with chronic myelogenous leukemia (CML). The main targets of Dasatinib, are BCRABL, SRC, Ephrins and GFR.	FYN,ABL1,SRC,EPHA2,LCK,YES1,KIT,PDGFRB,STAT5B,ABL2
Betahistine	2	DB06698	-3.89633	0.62475	4.09466	136.198	6.69979	4163	1212	3741	91	1144.81	1000	2662.56	3311	Betahistine is an antivertigo drug first used for treating vertigo assosicated with M茅ni猫re's disease. It is also commonly used for patients with balance disorders.	HRH1,HRH3
1,4-Butanediol	0	DB01955	-3.38797	0.75919	3.1508	90.122	6.6977	4314	479	4341	92	953.122	695	2077.79	2426	NA	MAN1B1,PLA2G2A,PLA2G2E,rsuA,mepA
Cabergoline	0	DB00248	-6.71226	0.28214	6.45661	451.615	6.69632	1888	3608	511	93	754.298	473	1515.53	1570	Cabergoline, an ergot derivative, is a long-acting dopamine agonist and prolactin inhibitor. It is used to treat hyperprolactinemic disorders and Parkinsonian Syndrome. Cabergoline possesses potent agonist activity on dopamine D2 receptors.	ADRA2C,DRD5,DRD1,HTR1B,HTR2C,HTR7,DRD2,HTR2B,DRD3,HTR2A,ADRA2B,HTR1D,DRD4,ADRA2A,HTR1A
Paricalcitol	0	DB00910	-9.13309	0.66891	6.93932	416.646	6.69442	52	957	104	94	148.515	24	172.975	44	Paricalcitol is a synthetic vitamin D analog. Paricalcitol has been used to reduce parathyroid hormone levels. Paricalcitol is indicated for the prevention and treatment of secondary hyperparathyroidism associated with chronic renal failure.	VDR
(Diaminomethyl-Methyl-Amino)-Acetic-Acid	2	DB02490	-3.88161	0.61717	3.57983	133.151	6.69301	4166	1252	4088	95	1193	1063	2772.97	3468	NA	CKM
ZK-800270	2	DB01665	-4.8288	0.94524	4.28066	133.154	6.68905	3691	23	3613	96	414.241	143	674.393	467	NA	PRSS1
D-Threonine	0	DB03700	-3.68315	0.69327	3.2907	119.12	6.68655	4231	823	4273	97	1096.07	931	2459.57	3016	NA	nprS
1,2,4-Triazole-Carboxamidine	0	DB02048	-3.54	0.87813	3.82876	112.116	6.68567	4274	132	3924	98	682.481	380	1303.3	1251	NA	NOS3
Ethyl-Carbamic-Acid-Methyl-Ester	0	DB03919	-3.0405	0.86444	3.23349	103.121	6.68143	4385	165	4311	99	745.447	460	1461.09	1486	NA	stxB
(2R)-2-({9-(1-methylethyl)-6-[(4-pyridin-2-ylbenzyl)amino]-9H-purin-2-yl}amino)butan-1-ol	9	DB08463	-6.57717	0.09095	6.20968	431.544	6.68096	2065	4418	865	100	942.52	681	1990.92	2300	NA	CDK2,CCNA2
4-(4-chlorobenzyl)-1-(7H-pyrrolo[2,3-d]pyrimidin-4-yl)piperidin-4-aminium	1	DB08150	-7.30804	0.11239	6.03837	342.854	6.6763	1039	4375	1216	101	864.395	592	1768.11	1950	NA	PRKACA,PKIA
N-{3-[(4-{[3-(TRIFLUOROMETHYL)PHENYL]AMINO}PYRIMIDIN-2-YL)AMINO]PHENYL}CYCLOPROPANECARBOXAMIDE	6	DB07545	-7.03964	0.5767	6.7596	413.403	6.67593	1397	1540	196	102	455.4	172	749.879	541	NA	AURKA
2,5-Dimethylpyrimidin-4-Amine	2	DB02372	-4.08951	0.91313	4.32574	123.159	6.67212	4089	72	3569	103	573.566	272	1016.64	874	NA	NA
Carbamic-Acid	5	DB04261	-2.09473	0.56041	2.64484	61.04	6.66677	4483	1663	4486	104	1365.65	1336	3221.86	3986	NA	penP
Methyl-Carbamic-Acid-Ethyl-Ester	0	DB02856	-3.09489	0.92431	3.52956	103.121	6.6636	4374	59	4118	105	577.965	275	1020.48	879	NA	stxB
2-Butanol	0	DB02606	-2.90182	0.77784	2.97862	74.123	6.66323	4408	409	4409	106	958.082	700	1995.73	2308	NA	adh
Isatoic-Anhydride	7	DB03058	-3.96559	0.72127	3.59973	123.155	6.65148	4140	669	4074	107	1048.23	847	2242.93	2708	NA	CFD
5-Aminoisoquinoline	2	DB04605	-5.01934	0.75199	4.1618	144.177	6.65014	3573	516	3696	108	926.21	660	1895.85	2153	NA	Tb927.5.1360
Amylamine	2	DB02045	-3.12924	0.84601	3.60462	87.166	6.64966	4365	204	4070	109	792.791	511	1536.04	1602	NA	PRSS1
Rescinnamine	1	DB01180	-7.51327	0.39309	6.9532	634.726	6.64781	821	2871	94	110	395.116	133	605.111	389	Rescinnamine is an angiotensin-converting enzyme inhibitor used as an antihypertensive drug. It is an alkaloid obtained from _Rauwolfia serpentina_ and other species of _Rauwolfia_.	ACE
5-Hydroxy-Norvaline	0	DB03105	-4.0615	0.46376	3.51743	133.147	6.64379	4100	2366	4124	111	1451.64	1497	3420.1	4176	NA	NA
12-(2-hydroxyethyl)-2-(1-methylethoxy)-13,14-dihydronaphtho[2,1-a]pyrrolo[3,4-c]carbazol-5(12H)-one	2	DB08703	-8.44889	0.27966	6.56301	424.5	6.64152	217	3622	383	112	428.505	154	670.197	463	NA	MAP3K9
4-Fluorobenzylamine	0	DB03243	-4.37785	0.51705	3.1832	126.154	6.6379	3962	1966	4333	113	1397.47	1394	3231.68	3995	NA	PRSS1
Pentane-1,5-Diamine	0	DB03854	-3.65698	0.55981	3.65733	102.181	6.63706	4246	1669	4023	114	1342.68	1301	3054.89	3807	A foul-smelling diamine formed by bacterial decarboxylation of lysine. [PubChem]	ispD
[4-R-(4-ALPHA,6-BETA,7-BETA]-HEXAHYDRO-5,6-DI(HYDROXY)-1,3-DI(ALLYL)-4,7-BISPHENYLMETHYL)-2H-1,3-DIAZEPINONE	4	DB06910	-6.22056	0.33889	6.13392	406.526	6.63186	2505	3264	1014	115	988.151	762	2023.94	2350	NA	gag-pol
Formic-Acid	5	DB01942	-1.69647	0.62511	2.41518	46.025	6.63128	4493	1208	4497	116	1297.17	1236	2900.74	3613	Formic acid (systematically called methanoic acid) is the simplest carboxylic acid. It is an important intermediate in chemical synthesis and occurs naturally, most famously in the venom of bee and ant stings. It is commonly used as a preservative and antibacterial agent in livestock feed.	CTBP1,pgl,citE,CASK,gmk,buk2,A2LD1,PVALB,ACYP2,BC_2969,HMOX1,astA,yvyI,NOS1,TM_1223,ycdX,phzD1,oxdC,actIII,GPHN,BC_1747,RNASE1,CYTH2,gcdA,TM_0065,VC_1899,katA,TM_1070,GST,HGPRTase,glsA1,glsA1,pyrD,moaE,TM_1131,fbpA,gyrB,ygbM,hemB,aroA,apr,FGF1,def,dhlB,pabB,CA2,bla,katA,ffh,Not-Available,mgsA
Butan-1-Ol	0	DB02145	-3.00467	0.60268	3.01072	74.123	6.62913	4392	1354	4398	117	1322.61	1272	2968.33	3704	NA	linB
SP4160	3	DB02555	-8.13762	0.6742	7.38869	685.657	6.62535	346	928	9	118	135.89	17	142.437	36	NA	IL2
Dihydroxyacetone	0	DB01775	-2.99296	0.6152	2.86215	90.078	6.61896	4395	1267	4448	119	1310.27	1259	2914.97	3631	A ketotriose compound. Its addition to blood preservation solutions results in better maintenance of 2,3-diphosphoglycerate levels during storage. It is readily phosphorylated to dihydroxyacetone phosphate by triokinase in erythrocytes. In combination with naphthoquinones it acts as a sunscreening agent. [PubChem]	dhaK
1,2-Propanediol	9	DB01839	-2.42756	0.86427	2.91887	76.095	6.61847	4462	166	4433	120	792.281	508	1486.32	1516	A clear, colorless, viscous organic solvent and diluent used in pharmaceutical preparations.	F13A1,linB,cs1,fucO,dhaB1
Ergotamine	0	DB00696	-9.87704	0.18729	6.80264	581.673	6.61607	8	4102	171	121	161.424	29	177.703	46	A vasoconstrictor found in ergot of Central Europe. It is an alpha-1 selective adrenergic agonist and is commonly used in the treatment of migraine disorders.	SLC6A2,HTR1D,HTR1B,HTR2A,DRD2,ADRA1A,ADRA1B,ADRA1D,ADRA2A,ADRA2B
Hydroxyacetic-Acid	2	DB03085	-2.80696	0.58925	2.68236	76.051	6.61382	4416	1450	4481	122	1367.83	1343	3061.43	3822	NA	G6PD,thiO
Fluocinonide	0	DB01047	-9.36852	0.3621	5.60651	494.531	6.61382	30	3099	2064	123	391.958	128	576.79	356	A topical glucocorticoid used in the treatment of eczema.	NR3C1,SMO
Ticagrelor	0	DB08816	-7.89215	0.43586	6.86478	522.578	6.61134	496	2567	135	124	382.09	122	556.007	331	Ticagrelor, marketed by Astra Zeneca as Brilinta in the US and Brilique or Possia in the EU, is a platelet aggregation inhibitor. It is not a prodrug like clopidogrel. The drug was approved for use in the European Union on 3 December 2010 and was given FDA approval on 20 July 2011.	P2RY12
3-Methyladenine	2	DB04104	-4.44093	0.94159	4.54577	149.157	6.60991	3931	28	3360	125	463.69	177	717.794	509	NA	tag
S-{3-[(4-ANILINOQUINAZOLIN-6-YL)AMINO]-3-OXOPROPYL}-L-CYSTEINE	1	DB07602	-6.77792	0.29888	6.15265	411.487	6.60772	1792	3513	980	126	938.973	677	1834.06	2066	NA	EGFR
N-[(2R,3S)-3-AMINO-2-HYDROXY-4-PHENYLBUTYL]NAPHTHALENE-2-SULFONAMIDE	7	DB07522	-6.77395	0.28596	5.50887	370.474	6.60426	1797	3588	2224	127	1161.68	1024	2429.47	2975	NA	F2
Aniline	2	DB06728	-3.71534	0.58687	3.17102	93.129	6.59985	4222	1473	4335	128	1362.95	1330	2998.5	3742	Aniline, phenylamine or aminobenzene is an organic compound with the formula C6H5NH2. Consisting of an amine attached to a benzene ring, aniline is the prototypical aromatic amine. Being a precursor to many industrial chemicals, its main use is in the manufacture of precursors to polyurethane. Like most volatile amines, it possesses the somewhat unpleasant odour of rotten fish. Aniline is colorle…	NA
Trifluorofurnesyl-Diphosphate	6	DB02808	-6.0165	0.19456	5.41774	436.3	6.5996	2727	4067	2364	129	1356.12	1320	2970.77	3707	NA	NA
2-fluoro-6-{[2-({2-methoxy-4-[(methylsulfonyl)methyl]phenyl}amino)-7H-pyrrolo[2,3-d]pyrimidin-4-yl]amino}benzamide	1	DB07845	-7.6247	0.16972	6.7052	484.513	6.59798	728	4168	240	130	554.694	253	899.684	723	NA	MAPK8
Cycloserine	2	DB00260	-3.24454	0.79131	3.41027	102.093	6.59622	4336	362	4202	131	964.12	712	1875.36	2130	Antibiotic substance produced by Streptomyces garyphalus.	ddlA,alr
Metocurine	3	DB01336	-8.35783	0.07476	6.50905	652.832	6.59402	247	4459	445	132	504.333	209	788.433	585	Dimethyltubocurarinium (INN) or metocurine (USAN), also known as dimethyltubocurarine, is a non-depolarizing muscle relaxant. Patients on chronic anticonvulsant drugs are relatively resistant to metocurine. [A2393]	CHRNA2,CHRM2
(Aminooxy)Acetic-Acid	0	DB02079	-3.14563	0.67248	2.7997	91.066	6.58705	4362	940	4467	133	1249.31	1154	2635.99	3270	A compound that inhibits aminobutyrate aminotransferase activity in vivo, thereby raising the level of gamma-aminobutyric acid in tissues. [PubChem]	AGXT
Norleucine	0	DB04419	-4.13591	0.53926	3.6253	131.175	6.58588	4076	1813	4055	134	1415.57	1434	3106.04	3871	An unnatural amino acid that is used experimentally to study protein structure and function. It is structurally similar to METHIONINE, however it does not contain SULFUR.	PTH,HNF1A,PAH
2-Amino-Pentanoic-Acid	1	DB04185	-3.72706	0.7458	3.66544	117.148	6.5841	4220	548	4017	135	1058.24	864	2102.16	2477	Norvaline is an isomer of the more common amino acid valine.	OTC,GATM
Norvaline	0	DB04185	-3.78279	0.4911	3.34192	117.148	6.5841	4201	2163	4240	136	1512.96	1607	3377.47	4133	Norvaline is an isomer of the more common amino acid valine.	OTC,GATM
5-[2,3-Dichloro-4-(5-{1-[2-(2-Guanidino-4-Methyl-Pentanoylamino)-Acetyl]-Piperidin-4-Yl}-1-Methyl-1h-Pyrazol-3-Yl)-Phenoxymethyl]-Furan-2-Carboxylic-Acid	0	DB02581	-8.21419	0.52159	7.0016	662.575	6.58394	306	1923	67	137	271.097	68	340.35	147	NA	IL2
6,7-DIMETHOXY-4-[(3R)-3-(2-NAPHTHYLOXY)PYRROLIDIN-1-YL]QUINAZOLINE	2	DB08389	-7.25479	0.316	6.13375	401.466	6.58214	1110	3402	1015	138	852.807	575	1564.98	1652	NA	PDE10A
Virginiamycin-M1	2	DB01669	-7.97308	0.54802	6.47414	525.602	6.57924	443	1756	486	139	478.79	188	723.083	516	Pristinamycin IIA is a macrolide antibiotic, a member of the streptogramin A group of antibiotics, and one component of pristinamycin. It is produced by Streptomyces graminofaciens and other bacteria.	vatD
L-Threonine	0	DB00156	-3.68276	0.4568	2.94032	119.12	6.57891	4232	2413	4425	140	1585.94	1735	3561.82	4303	An essential amino acid occurring naturally in the L-form, which is the active form. It is found in eggs, milk, gelatin, and other proteins. [PubChem]	THNSL1,TARS,TARS2
1,2-Dimethoxyethane	0	DB01749	-2.43495	0.75476	3.11119	90.122	6.57616	4461	502	4354	141	1082.83	912	2136.36	2541	NA	NA
Gemifloxacin	0	DB01155	-7.27377	0.29139	6.32319	389.387	6.57552	1078	3553	694	142	783.818	501	1385.24	1365	Gemifloxacin is a quinolone antibacterial agent with a broad-spectrum activity that is used in the treatment of acute bacterial exacerbation of chronic bronchitis and mild-to-moderate pneumonia. It is available in oral formulations. Gemifloxacin acts by inhibiting DNA synthesis through the inhibition of both DNA gyrase and topoisomerase IV, which are essential for bacterial growth.	parC,gyrA
Choline	6	DB00122	-2.63589	0.71362	3.43877	104.173	6.57373	4437	716	4189	143	1174.52	1042	2369.76	2878	A basic constituent of lecithin that is found in many plants and animal organs. It is important as a precursor of acetylcholine, as a methyl donor in various metabolic processes, and in lipid metabolism.	PCYT1B,ACHE,PCYT1A,PLD2,BCHE,PLD1,PHOSPHO1
Purvalanol-A	0	DB04751	-6.98059	0.10312	6.02943	388.903	6.57052	1493	4395	1238	144	1039.98	828	2010.23	2330	NA	SRC,CSNK1G3,RPS6KA1
Buprenorphine	3	DB00921	-9.30022	0.3049	5.1642	467.65	6.56842	39	3477	2728	145	481.25	189	717.857	510	Buprenorphine is a derivative of the opioid alkaloid thebaine that is a more potent (25 - 40 times) and longer lasting analgesic than morphine. It appears to act as a partial agonist at mu and kappa opioid receptors and as an antagonist at delta receptors. The lack of delta-agonist activity has been suggested to account for the observation that buprenorphine tolerance may not develop with chronic…	OPRM1,OPRK1,OPRD1
L-Ornithine	0	DB00129	-4.1027	0.37609	3.59495	132.163	6.56839	4084	2974	4078	146	1639.86	1833	3672.47	4366	Produced during the urea cycle, ornithine is an amino acid produced from the splitting off of urea from arginine. L-Ornithine allows for the disposal of excess nitrogen and acts as a precursor of citrulline and arginine.	SLC25A15,SLC7A3,OAZ2,GATM,OAZ3,OAT,OTC,ARG1,OAZ1,SLC7A2,SLC25A2,SLC7A4,SLC7A1,ARG2
L-Isoleucine	5	DB00167	-3.86513	0.71413	4.02168	131.175	6.56671	4176	710	3791	147	1133.76	984	2240.05	2698	An essential branched-chain aliphatic amino acid found in many proteins. It is an isomer of leucine. It is important in hemoglobin synthesis and regulation of blood sugar and energy levels.	IARS,IARS2,ACADSB,BCAT1,BCAT2,IARS
3-Amino-Alanine	0	DB03320	-3.3003	0.48759	3.02517	105.117	6.5626	4330	2187	4392	148	1575.13	1715	3464.71	4216	NA	env
3,5-Difluoroaniline	0	DB03238	-4.28446	0.39377	3.5145	129.109	6.56259	4009	2864	4130	149	1630.37	1813	3619.54	4336	NA	E
Iodipamide	0	DB04711	-6.49271	0.07694	6.98899	1139.76	6.5583	2171	4454	74	150	572.378	270	894.432	716	Iodipamide is a water-soluble radiographic contrast media for cholecystography and intravenous cholangiography.	NA
(3R,4R)-1-{6-[3-(METHYLSULFONYL)PHENYL]PYRIMIDIN-4-YL}-4-(2,4,5-TRIFLUOROPHENYL)PIPERIDIN-3-AMINE	3	DB08164	-8.0779	0.38507	6.70161	462.497	6.54072	383	2921	247	151	451.961	170	651.342	434	NA	DPP4
L-Aspartic-Acid	0	DB00128	-3.96627	0.44433	2.78727	133.103	6.54012	4139	2504	4471	152	1629.09	1812	3591.79	4324	One of the non-essential amino acids commonly occurring in the L-form. It is found in animals and plants, especially in sugar cane and sugar beets. It may be a neurotransmitter.	GOT2,DARS,SLC25A12,ASPH,PAICS,CAD,ADSS,SLC1A1,GIG18,ADSS,RNASE1,ASS1,DARS2,ASRGL1,ADSSL1,ACY3,LYZ,SLC25A13,GOT1,SLC25A13,ASPA,ASNS,ASS1,ACY1
Etorphine	0	DB01497	-8.72088	0.30055	5.41599	411.542	6.53993	128	3501	2367	153	634.706	336	1019.84	878	A narcotic analgesic morphinan used as a sedative in veterinary practice. In certain countries, etorphine is classified as a Schedule 1 drug and hence, in these countries, it can be used legally only by health professionals and for research purposes. Etorphine is only available to the patients under an official prescription. In the US, Etorphine is listed as a Schedule I drug, although Etorphine …	OPRM1,OPRD1,OPRK1,OPRL1,TRIM13,POMC
6-(4-{(1S,2S)-2-AMINO-1-[(DIMETHYLAMINO)CARBONYL]-3-[(3S)-3-FLUOROPYRROLIDIN-1-YL]-3-OXOPROPYL}PHENYL)-1H-[1,2,4]TRIAZOLO[1,5-A]PYRIDIN-4-IUM	0	DB08504	-7.94053	0.08313	5.89328	424.48	6.53963	462	4438	1513	154	831.376	553	1458.44	1480	NA	DPP4
(2R)-1-(DIMETHYLAMINO)-3-{4-[(6-{[2-FLUORO-5-(TRIFLUOROMETHYL)PHENYL]AMINO}PYRIMIDIN-4-YL)AMINO]PHENOXY}PROPAN-2-OL	1	DB07054	-6.93085	0.1743	6.09185	465.451	6.53927	1566	4146	1113	155	1028.76	817	1933.33	2220	NA	CDK2
N-Carbamoyl-Alanine	9	DB04048	-3.45736	0.78293	3.52271	132.119	6.53903	4297	393	4121	156	1020.75	796	1909.21	2180	NA	PRDX2
N-[2-Hydroxy-2-(8-Isopropyl-6,9-Dioxo-2-Oxa-7,10-Diaza-Bicyclo[11	3	DB03768	-7.32746	0.08117	6.29189	573.756	6.53621	1012	4443	745	157	851.585	572	1496.25	1532	NA	gag-pol
Duloxetine	8	DB00476	-5.62695	0.40671	5.45916	297.423	6.53611	3106	2775	2297	158	1329.91	1280	2705.26	3382	Duloxetine is a dual serotonin and norepinephrine reuptake inhibitor.[label] It was originally discovered in 1993 and developed by Eli Lilly and Company as LY248686.[A178741] Duloxetine first received approval from the FDA in August, 2004 as Cymbalta for the treatment of Major Depressive Disorder.[L6454] It has since received approval for a variety of indications including the treatment of neurop…	SLC6A4,SLC6A2,SLC6A3
1-Aminocyclopropanecarboxylic-Acid	0	DB02085	-3.73612	0.50048	3.02705	101.105	6.53531	4217	2087	4391	159	1574.42	1713	3380.88	4138	NA	acdS
Cp403700,-(S)-1-{2-[(5-Chloro-1h-Indole-2-Carbonyl)-Amino]-3-Phenyl-Propionyl}-Azetidine-3-Carboxylate	0	DB03744	-7.66856	0.36312	6.18348	425.872	6.53307	686	3092	922	160	747.917	462	1250.54	1166	NA	PYGL
(3R,4S)-1-{6-[3-(METHYLSULFONYL)PHENYL]PYRIMIDIN-4-YL}-4-(2,4,5-TRIFLUOROPHENYL)PYRROLIDIN-3-AMINE	1	DB07666	-8.43844	0.4427	6.61332	448.47	6.53244	225	2517	330	161	416.487	147	571.733	349	NA	DPP4
3-Hydroxy-Propanoic-Acid	2	DB03688	-3.05828	0.84457	3.10765	90.078	6.53029	4381	210	4358	162	897.736	626	1588.64	1692	NA	bioH
Allo-Isoleucine	3	DB01739	-3.97228	0.74152	3.96311	131.175	6.52284	4136	573	3841	163	1103.68	942	2087.98	2450	NA	NA
L-Alanine	4	DB00160	-3.11183	0.70865	3.10507	89.094	6.52201	4368	741	4359	164	1233.34	1128	2416.37	2949	A non-essential amino acid that occurs in high levels in its free state in plasma. It is produced from pyruvate by transamination. It is involved in sugar and acid metabolism, increases immunity, and provides energy for muscle tissue, brain, and the central nervous system.	SLC7A8,AGXT2,AARS,SLC1A4,AGXT,ABAT,KYNU,AARS2,AGXT2L2,GPT2,GPT,NFS1,SLC36A1
D-Alanine	4	DB00160	-3.10049	0.68644	3.0815	89.094	6.52201	4371	866	4367	165	1285.11	1213	2547.38	3146	A non-essential amino acid that occurs in high levels in its free state in plasma. It is produced from pyruvate by transamination. It is involved in sugar and acid metabolism, increases immunity, and provides energy for muscle tissue, brain, and the central nervous system.	SLC7A8,AGXT2,AARS,SLC1A4,AGXT,ABAT,KYNU,AARS2,AGXT2L2,GPT2,GPT,NFS1,SLC36A1
(2S,3S)-3-{3-[2-chloro-4-(methylsulfonyl)phenyl]-1,2,4-oxadiazol-5-yl}-1-cyclopentylidene-4-cyclopropyl-1-fluorobutan-2-amine	4	DB06994	-7.44458	0.64579	7.16489	453.967	6.52022	902	1078	33	166	270.154	67	317.77	126	NA	DPP4
Gabaculine	0	DB02054	-4.97611	0.50971	3.20897	137.138	6.51987	3597	2009	4322	167	1511.23	1604	3149.21	3909	NA	OAT,hemL
AUROVERTIN-B	0	DB07394	-7.69862	0.35398	6.22156	460.523	6.51952	654	3155	846	168	735.892	444	1204.06	1096	NA	ATP5A1,ATP5B,ATP5C1
Pyrazinamide	2	DB00339	-3.66138	0.89016	4.05249	123.115	6.51904	4243	110	3770	169	738.454	448	1207.26	1107	A pyrazine that is used therapeutically as an antitubercular agent.	fas
1-Hydroxy-3-Methylbutane	5	DB02296	-3.1352	0.86461	3.39023	88.15	6.51873	4364	163	4220	170	845.198	564	1442.54	1453	NA	REN
Trifluoroethanol	1	DB03226	-3.30253	0.67427	3.09095	100.039	6.51751	4329	927	4364	171	1315.49	1265	2596.87	3211	A non-aqueous co-solvent that serves as tool to study protein folding. It is also used in various pharmaceutical, chemical and engineering applications.	Not-Available,ADH1C,HRAS
Leucine---Reduced-Carbonyl	3	DB02107	-3.41805	0.58879	3.74631	101.193	6.51274	4306	1459	3971	172	1439.26	1468	2921.97	3639	NA	SPINK6
Dimethylglycine	1	DB02083	-3.1551	0.49256	2.99876	103.121	6.51214	4360	2149	4403	173	1634.48	1824	3455.34	4207	NA	soxA
Fluocinolone-Acetonide	7	DB00591	-8.89803	0.42229	6.4576	452.494	6.50435	83	2682	509	174	374.715	118	483.895	267	Fluocinolone acetonide, with the formula 6-alpha, 9-alpha-difluoro-16-alpha, 17 alpha-acetonide, is a corticosteroid that presents a high lipophilicity.[T357] It has been used extensively in dermatological preparations and it has also been investigated thoroughly for its use in implantable corticosteroid devices.[T358] This type of device containing fluocinolone acetonide was developed by Taro Ph…	NR3C1
Flurandrenolide	5	DB00846	-9.31508	0.52009	6.37503	436.52	6.50253	37	1934	624	175	297.317	77	354.771	154	A corticosteroid used topically in the treatment of various skin disorders. It is usually employed as a cream or an ointment, and is also used as a polyethylene tape with an adhesive. (From Martindale, The Extra Pharmacopoeia, 30th ed, p733)	NR3C1
D-Aspartic-Acid	0	DB02655	-3.95986	0.45409	2.83054	133.103	6.49814	4143	2432	4458	176	1676.81	1901	3554.73	4297	The D-isomer of aspartic acid. [PubChem]	nprS,ansB
Antrafenine	3	DB01419	-8.02636	0.341	7.08299	588.552	6.49617	411	3247	51	177	331.297	95	408.286	200	Antrafenine is a piperazine derivative drug that acts as an analgesic and anti-inflammatory drug with similar efficacy to naproxen. It is not widely used as it has largely been replaced by newer drugs.	PTGS1,PTGS2
INHIBITOR-Q8467-OF-DUPONT-MERCK	0	DB04609	-8.23997	0.07469	5.89882	596.753	6.49432	293	4460	1504	178	769.073	483	1252.61	1172	NA	gag-pol
Propidium	6	DB02166	-6.77847	0.19724	6.44258	414.597	6.49264	1790	4058	529	179	910.686	639	1566.3	1655	Quaternary ammonium analog of ethidium; an intercalating dye with a specific affinity to certain forms of DNA and, used as diiodide, to separate them in density gradients; also forms fluorescent complexes with cholinesterase which it inhibits. [PubChem]	ACHE
Delta-Amino-Valeric-Acid	1	DB02068	-3.52705	0.4315	3.49338	118.156	6.49184	4282	2598	4151	180	1697.96	1937	3587.67	4318	NA	GATM,ALAD
TRIAZOLOPYRIMIDINE	0	DB04669	-7.34532	0.30195	5.81624	382.245	6.48185	993	3492	1652	181	1009.09	782	1789.28	1992	NA	CDK2
Benzylamine	3	DB02464	-4.01483	0.48911	3.25559	107.156	6.4787	4125	2179	4300	182	1628.57	1809	3381.04	4139	NA	PRSS2,PRSS1
Ketoconazole	2	DB01026	-7.44258	0.47454	6.82705	531.44	6.47831	906	2290	153	183	490.938	201	682.158	472	Broad spectrum antifungal agent used for long periods at high doses, especially in immunosuppressed patients. It is a racemate consisting of equimolar amounts of (2R,4S)- and (2S,4R)-ketoconazole with the chiral centers on the acetal ring.	ERG11
Itraconazole	0	DB01167	-7.94353	0.27422	6.38844	705.647	6.47806	459	3658	600	184	656.155	357	1002.46	856	One of the triazole antifungal agents that inhibits cytochrome P-450-dependent enzymes resulting in impairment of ergosterol synthesis. It has been used against histoplasmosis, blastomycosis, cryptococcal meningitis & aspergillosis.	CYP51A1,ERG11
2-Aminoprop-2-Enamide	0	DB02002	-3.10154	0.75783	3.31289	86.094	6.47675	4370	492	4258	185	1140.79	994	2091.95	2460	NA	NA
Dihydroergotamine	0	DB00320	-9.86711	0.18317	6.79722	583.689	6.47621	9	4115	174	186	186.067	37	186.089	50	A 9,10alpha-dihydro derivative of ergotamine. It is used as a vasoconstrictor, specifically for the therapy of migraine disorders.	HTR1D,HTR1B,ADRA2A,HTR2B
6-FLUORO-2-[2-HYDROXY-3-(2-METHYL-CYCLOHEXYLOXY)-PHENYL]-1H-INDOLE-5-CARBOXAMIDINE	0	DB06856	-8.17187	0.55542	6.26142	381.451	6.47314	324	1700	792	187	534.429	230	758.414	551	NA	PLAU
L-Leucine	7	DB00149	-3.67944	0.61944	3.93639	131.175	6.46879	4234	1240	3854	188	1396.56	1388	2724.97	3415	An essential branched-chain amino acid important for hemoglobin formation. [PubChem]	LARS2,BCAT2,BCAT1,LCMT2,LCMT1,LARS
D-Leucine	2	DB00149	-4.08331	0.67031	3.75933	131.175	6.46879	4092	952	3964	189	1307.05	1254	2490.21	3048	An essential branched-chain amino acid important for hemoglobin formation. [PubChem]	LARS2,BCAT2,BCAT1,LCMT2,LCMT1,LARS
2-(4-CHLOROBENZYLAMINO)-4-(PHENYLAMINO)PYRAZOLO[1,5-A][1,3,5]TRIAZINE-8-CARBONITRILE	0	DB08354	-6.74791	0.61682	6.71872	375.823	6.46466	1836	1256	229	190	562.811	260	808.288	607	NA	CSNK2A1
Cerivastatin	0	DB00439	-6.48749	0.1113	5.81064	459.558	6.46463	2179	4378	1670	191	1320.75	1268	2516.23	3098	On August 8, 2001 the U.S. Food and Drug Administration (FDA) announced that Bayer Pharmaceutical Division voluntarily withdrew Baycol from the U.S. market, due to reports of fatal Rhabdomyolysis, a severe adverse reaction from this cholesterol-lowering (lipid-lowering) product. It has also been withdrawn from the Canadian market.	HMGCR
5-Amino-1h-Pyrimidine-2,4-Dione	0	DB03792	-4.11581	0.69983	3.61707	127.103	6.46124	4082	787	4063	192	1258.2	1175	2354.5	2859	NA	RNASE1
2-Fluoroaniline	4	DB02403	-3.86514	0.61056	3.64641	111.119	6.46005	4175	1300	4034	193	1433.75	1457	2797.55	3497	NA	E
N-(5-chloro-1,3-benzodioxol-4-yl)-6-methoxy-7-(3-piperidin-1-ylpropoxy)quinazolin-4-amine	0	DB07249	-7.13437	0.21597	6.51502	470.957	6.46005	1255	3970	436	194	805.713	525	1295.11	1242	NA	EPHB4
(R,R)-2,3-Butanediol	7	DB02418	-2.77042	0.77998	3.19487	90.122	6.45734	4423	405	4327	195	1108.79	949	1979.03	2287	NA	UBE2D2
Difluprednate	0	DB06781	-8.53588	0.51415	6.95801	508.558	6.4565	187	1980	90	196	284.283	74	321.798	131	Difluprednate is a topical corticosteroid indicated for the treatment of infammation and pain associated with ocular surgery. It is a butyrate ester of 6(伪), 9(伪)-difluoro prednisolone acetate. Difluprednate is abbreviated DFBA, or difluoroprednisolone butyrate acetate. It is indicated for treatment of endogenous anterior uveiti.	NR3C1
Fesoterodine	1	DB06702	-6.47824	0.17623	5.84861	411.586	6.45299	2187	4139	1595	197	1298.65	1237	2435.01	2985	Fesoterodine is an antimuscarinic prodrug for the treatment of overactive bladder syndrome.	CHRM3,CHRM4,CHRM1,CHRM2,CHRM5
N'-(3-CHLORO-4-METHOXY-PHENYL)-N-(3,4,5-TRIMETHOXYPHENYL)-1,3,5-TRIAZINE-2,4-DIAMINE	2	DB07251	-6.44076	0.44275	6.52326	417.853	6.45228	2231	2514	426	198	829.344	549	1336.88	1300	NA	EPHB4
7-BENZYL-1,3-DIMETHYL-8-PIPERAZIN-1-YL-3,7-DIHYDRO-PURINE-2,6-DIONE	3	DB08530	-6.66474	0.56278	6.08488	355.422	6.4514	1948	1648	1129	199	921.559	653	1536.08	1603	NA	DPP4
1-(3-chlorophenyl)-3-{5-[2-(thieno[3,2-d]pyrimidin-4-ylamino)ethyl]-1,3-thiazol-2-yl}urea	0	DB06134	-7.38364	0.39069	6.3921	430.946	6.44905	956	2884	595	200	756.833	474	1179.39	1062	SNS-314 is a potent and selective inhibitor of Aurora kinases A, B, and C. Proliferating cells treated with SNS-314 bypass the mitotic spindle checkpoint and fail to undergo cytokinesis, leading to multiple rounds of endoreduplication and eventually cell death. SNS-314 inhibits tumor growth in a variety of preclinical models, and it is now being tested in single agent Phase 1 studies in patients …	NA
Nafcillin	0	DB00607	-8.07563	0.425	6.09277	414.483	6.4487	386	2656	1109	201	691.41	387	1043.72	896	A semi-synthetic antibiotic related to penicillin, Naficillin is a narrow-spectrum beta-lactam antibiotic drug. It is a beta-lactamase-resistant penicillin that is indicated for the treatment of Staphylococcal infections caused by strains that are resistant to other penicillins, except those caused by MRSA. It may be used as a first-line therapy in Methicillin-Sensitive *Staphylococcus aureus* in…	pbp1b,penA,pbp2a,pbp3,pbpA
4-Carboxy-4-Aminobutanal	5	DB04388	-3.48295	0.4236	3.57126	131.131	6.44778	4291	2664	4096	202	1753.68	2026	3604.27	4330	NA	ansB
N-1H-indazol-5-yl-2-(6-methylpyridin-2-yl)quinazolin-4-amine	3	DB08450	-7.88799	0.23019	6.32645	352.401	6.44751	501	3904	689	203	723.212	424	1104.56	962	NA	TGFBR1
D-Proline	7	DB00172	-3.3984	0.50611	3.5062	115.132	6.44486	4310	2045	4142	204	1651.97	1859	3317.37	4078	L-Proline is one of the twenty amino acids used in living organisms as the building blocks of proteins. Proline is sometimes called an imino acid, although the IUPAC definition of an imine requires a carbon-nitrogen double bond. Proline is a non-essential amino acid that is synthesized from glutamic acid. It is an essential component of collagen and is important for proper functioning of joints a…	PPIG,LEPRE1,P5CR2,PARS2,LEPREL1,LEPREL2,PYCRL,C14orf149,PYCR1,EPRS,P4HA2,SLC6A14,SLC6A7,PYCR2,PRODH,PPIH,PROSC,P4HA1,PPIB,PPIF,PPIC,PPIA
L-Proline	7	DB00172	-3.54519	0.52642	3.48328	115.132	6.44486	4273	1890	4161	205	1620.08	1799	3226.99	3992	L-Proline is one of the twenty amino acids used in living organisms as the building blocks of proteins. Proline is sometimes called an imino acid, although the IUPAC definition of an imine requires a carbon-nitrogen double bond. Proline is a non-essential amino acid that is synthesized from glutamic acid. It is an essential component of collagen and is important for proper functioning of joints a…	PPIG,LEPRE1,P5CR2,PARS2,LEPREL1,LEPREL2,PYCRL,C14orf149,PYCR1,EPRS,P4HA2,SLC6A14,SLC6A7,PYCR2,PRODH,PPIH,PROSC,P4HA1,PPIB,PPIF,PPIC,PPIA
4-{4-[(5-hydroxy-2-methylphenyl)amino]quinolin-7-yl}-1,3-thiazole-2-carbaldehyde	0	DB07832	-8.23514	0.97293	7.14512	361.426	6.44168	298	1	38	206	39.0811	2	22.456	2	NA	MAPK14
1,6-Diaminohexane	2	DB03260	-3.65822	0.44182	3.80544	116.208	6.44004	4245	2525	3936	207	1719.06	1968	3481.22	4228	NA	DR_A0149
NADH	0	DB00157	-8.17829	0.02105	4.91855	665.446	6.4382	318	4497	3027	208	974.106	738	1629.75	1762	NADH is the reduced form of NAD+, and NAD+ is the oxidized form of NADH, a coenzyme composed of ribosylnicotinamide 5'-diphosphate coupled to adenosine 5'-phosphate by pyrophosphate linkage. It is found widely in nature and is involved in numerous enzymatic reactions in which it serves as an electron carrier by being alternately oxidized (NAD+) and reduced (NADH). It forms NADP with the addition …	NDUFA1,MT-ND6,MT-ND5,NDUFA4,NDUFA6,NDUFAB1,NDUFA2,NDUFA8,NDUFA3,NDUFB8,ADH5,NDUFC2,NDUFB1,NDUFS1,NDUFB10,NDUFB4,NDUFB3,NDUFB2,NDUFB7,NDUFB9,NDUFS2,AKR1B1,NDUFB5,NDUFC1,NDUFB6,NDUFV3,DLD,NDUFS3,GSR,NDUFA12,NDUFS5,NDUFS4,HSD17B10,NDUFV1,NDUFV2,NDUFA13,CDO1,NDUFS6,NDUFA4L2,NDUFS8,CYP4A11,DLAT,AMT,MDH2,SC4MOL,HMOX1,HMOX2,CYP17A1,TYR,LDHA,ME2,HSD17B4,LDHAL6B,LDHC,LDHB,UGDH,EHHADH,HADH,ME3,BDH1,MDH1,HI…
Clocortolone	5	DB00838	-8.54745	0.68115	6.55226	410.913	6.43557	184	897	392	209	341.005	101	401.451	194	Clocortolone is a medium potency corticosteroid that is often used as a topical cream for the relief of inflammatory oand pruritic (itching) arising from steroid-responsive dermatoses of the scalp.	NR3C1
3-Hydroxypyruvic-Acid	0	DB02951	-3.31602	0.83441	3.15739	104.061	6.42962	4323	231	4338	210	976.622	744	1630.16	1763	NA	TPI,nanA
L-Phenylalaninol	8	DB04484	-4.26831	0.52503	4.06332	151.209	6.42734	4015	1900	3760	211	1568.47	1700	3061.09	3818	NA	NA
Terconazole	2	DB00251	-7.31537	0.69173	7.02621	532.472	6.42665	1029	832	60	212	323.04	93	371.732	168	Terconazole is an anti-fungal drug that is mainly used to treat vaginal yeast infections (or vaginal candidiasis). It is classified as a _triazole ketal derivative_.[A178096] Terconazole was initially approved by the FDA in 1987.[FDA label] This drug is available in cream and suppository forms and both have demonstrated high levels of safety, efficacy, and tolerability in clinical trials. [A17809…	ERG11
1-Ter-Butyl-3-P-Tolyl-1h-Pyrazolo[3,4-D]Pyrimidin-4-Ylamine	2	DB01809	-6.53923	0.74657	6.33836	281.363	6.42289	2115	539	666	213	634.145	335	912.272	745	NA	HCK,RET
(2R)-4-[(8R)-8-METHYL-2-(TRIFLUOROMETHYL)-5,6-DIHYDRO[1,2,4]TRIAZOLO[1,5-A]PYRAZIN-7(8H)-YL]-4-OXO-1-(2,4,5-TRIFLUOROPHENYL)BUTAN-2-AMINE	2	DB07081	-7.45305	0.61784	6.89335	421.345	6.41866	884	1247	125	214	414.391	144	516.507	292	NA	DPP4
D-Asparagine	2	DB03943	-3.89626	0.44192	3.40662	132.119	6.41859	4164	2521	4208	215	1755.49	2031	3534.98	4282	A non-essential amino acid that is involved in the metabolic control of cell functions in nerve and brain tissue. It is biosynthesized from ASPARTIC ACID and AMMONIA by asparagine synthetase. (From Concise Encyclopedia Biochemistry and Molecular Biology, 3rd ed)	NA
Dihydroetorphine	0	DB01450	-8.62401	0.25013	5.38236	413.558	6.4182	163	3803	2408	216	753.54	470	1142.85	1006	NA	NA
Chloroquine	2	DB00608	-5.89101	0.77423	6.49049	319.88	6.41592	2861	419	464	217	589.423	284	822.4	624	The prototypical antimalarial agent with a mechanism that is not well understood. It has also been used to treat rheumatoid arthritis, systemic lupus erythematosus, and in the systemic therapy of amebic liver abscesses.	Not-Available,GSTA2,TNF,TLR9
1-((1R)-1-(HYDROXYMETHYL)-3-{6-[(3-PHENYLPROPANOYL)AMINO]-1H-INDOL-1-YL}PROPYL)-1H-IMIDAZOLE-4-CARBOXAMIDE	4	DB07783	-7.08009	0.14291	6.33737	445.523	6.41448	1327	4283	669	218	954.169	696	1560.8	1648	NA	ADA
2-Aminopropanedioic-Acid	1	DB02289	-3.46679	0.56071	3.12301	119.076	6.41396	4296	1658	4351	219	1614.06	1787	3141.08	3904	NA	atsA
Cisapride	0	DB00604	-7.22038	0.24547	6.07116	465.953	6.41337	1150	3821	1163	220	1029.72	819	1722.47	1873	In many countries (including Canada) cisapride has been either withdrawn or has had its indications limited due to reports about long QT syndrome due to cisapride, which predisposes to arrhythmias. The FDA issued a warning letter regarding this risk to health care professionals and patients.	HTR4,HTR3A,HTR2A,KCNH2
Methylphosphinic-Acid	3	DB02845	-2.12507	0.70148	2.56363	80.023	6.41289	4481	772	4493	221	1361.38	1327	2495.61	3055	NA	estA,BCHE,ACHE
N-(3-(8-CYANO-4-(PHENYLAMINO)PYRAZOLO[1,5-A][1,3,5]TRIAZIN-2-YLAMINO)PHENYL)ACETAMIDE	5	DB08362	-6.941	0.60069	6.61564	384.403	6.41266	1554	1368	328	222	627.25	324	886.755	706	NA	CSNK2A1
1,4-Diethylene-Dioxide	1	DB03316	-2.72054	0.73755	2.96485	88.106	6.41128	4430	594	4414	223	1268.62	1193	2264.68	2743	NA	apr,TNFSF13B,EPN1,Not-Available,TGFB3
4-[(1S,2R,5S)-4,4,8-TRIMETHYL-3-OXABICYCLO[3	0	DB08595	-7.89975	0.49743	5.55746	258.361	6.41087	487	2113	2147	224	838.74	560	1302.43	1250	NA	ESR1,NCOA2
L-Asparagine	0	DB00174	-4.13784	0.43159	2.92364	132.119	6.40932	4075	2597	4430	225	1802.17	2105	3605.8	4331	A non-essential amino acid that is involved in the metabolic control of cell functions in nerve and brain tissue. It is biosynthesized from aspartic acid and ammonia by asparagine synthetase. (From Concise Encyclopedia Biochemistry and Molecular Biology, 3rd ed)	SLC1A5,ASRGL1,NARS2,SLC38A3,ASNS,NARS
D-Glutamic-Acid	4	DB00142	-4.05499	0.43894	3.5916	147.13	6.40334	4108	2542	4082	226	1761.76	2041	3493.22	4237	A peptide that is a homopolymer of glutamic acid.	BCAT2,GRIN2D,GRID2,GRIN3B,PET112L,GLS,GOT2,EPRS,ASNS,GLUL,GRM1,GOT1,TAT,GPT,GGCX,SLC1A3,SLC1A2,SLC1A1,GCLC,SLC1A6,GLUD2,GRM4,GMPS,BCAT1,ABAT,GRIN1,FPGS,ENPEP,GRIN2A,GRIN2B,GRIN2C,GIG18,GRIK4,EARS2,LGSN,NADSYN1,CCBL2,NAGS,AADAT,GRIN3A,GPT2,SLC25A18,SLC25A22,GRIK5,AASS,GLS2,DNPEP,GRID1,SLC7A11,PGCP,PSAT1,GLUD1,GRIK1,GRIA1,GRM7,GCLM,FOLH1,GAD2,GAD1,FTCD,GRIA2,GRIA3,GRIA4,ALDH18A1,GRIK2,GRM8,GRIK3,SL…
L-Glutamic-Acid	1	DB00142	-4.20352	0.48859	3.49023	147.13	6.40334	4041	2182	4155	227	1698.19	1938	3321.28	4084	A peptide that is a homopolymer of glutamic acid.	BCAT2,GRIN2D,GRID2,GRIN3B,PET112L,GLS,GOT2,EPRS,ASNS,GLUL,GRM1,GOT1,TAT,GPT,GGCX,SLC1A3,SLC1A2,SLC1A1,GCLC,SLC1A6,GLUD2,GRM4,GMPS,BCAT1,ABAT,GRIN1,FPGS,ENPEP,GRIN2A,GRIN2B,GRIN2C,GIG18,GRIK4,EARS2,LGSN,NADSYN1,CCBL2,NAGS,AADAT,GRIN3A,GPT2,SLC25A18,SLC25A22,GRIK5,AASS,GLS2,DNPEP,GRID1,SLC7A11,PGCP,PSAT1,GLUD1,GRIK1,GRIA1,GRM7,GCLM,FOLH1,GAD2,GAD1,FTCD,GRIA2,GRIA3,GRIA4,ALDH18A1,GRIK2,GRM8,GRIK3,SL…
(2r)-2,3-Dihydroxypropanal	1	DB02536	-2.98935	0.61259	2.83032	90.078	6.40228	4396	1283	4459	228	1547.44	1666	2929.82	3646	NA	NA
N-(4-{[(3S)-3-(dimethylamino)pyrrolidin-1-yl]carbonyl}phenyl)-5-fluoro-4-[2-methyl-1-(1-methylethyl)-1H-imidazol-5-yl]pyrimidin-2-amine	3	DB07936	-7.15914	0.18052	6.52594	451.55	6.40167	1227	4123	418	229	834.195	556	1283.55	1219	NA	CDK2
5-methylbenzimidazole	1	DB03177	-4.64427	0.77034	4.28556	132.166	6.40089	3807	433	3603	230	1081.1	909	1810.97	2028	NA	cobT
Haloxazolam	0	DB01476	-7.71427	0.22543	5.87922	377.213	6.40048	644	3929	1542	231	974.352	740	1574.29	1668	NA	NA
Lactulose	0	DB00581	-8.11205	0.44274	3.94952	342.297	6.39944	359	2516	3847	232	947.554	687	1514.64	1569	"Lactulose is a synthetic disaccharide derivative of lactose that is most commonly used as a laxative agent despite also being formally indicated to serve as an adjunct therapy in treating portal-systemic encephalopathy (PSE).[FDA Label,L6199,L6202] Despite being first synthesized in 1929[A178081], investigations regarding its possible use as a laxative for the treatment of chronic constipation d…	ebgA
N'-(Pyrrolidino[2,1-B]Isoindolin-4-On-8-Yl)-N-(Pyridin-2-Yl)Urea	0	DB04186	-7.59103	0.25183	5.67138	308.341	6.39684	755	3790	1945	233	1067.13	881	1772.16	1958	NA	CDK2
3-Amino-3-Oxopropanoic-Acid	4	DB02649	-3.14315	0.63284	2.88076	103.077	6.39673	4363	1160	4445	234	1514.72	1610	2822.96	3532	NA	Not-Available
Cyclohexyl-{4-[5-(3,4-Dichlorophenyl)-2-Piperidin-4-Yl-3-Propyl-3h-Imidazol-4-Yl]-Pyrimidin-2-Yl}Amine	1	DB02388	-7.67293	0.04383	7.00327	513.517	6.39644	679	4491	66	235	466.344	180	586.029	369	NA	MAPK10
4-(2-methoxyethoxy)-6-methylpyrimidin-2-amine	0	DB08786	-4.59013	0.94695	4.75513	183.211	6.39546	3842	21	3169	236	495.624	205	634.697	411	NA	HSP90AA1
D-Lactic-Acid	6	DB03066	-2.98797	0.81112	3.02257	90.078	6.39429	4397	299	4393	237	1081.64	910	1794.17	1997	A normal intermediate in the fermentation (oxidation, metabolism) of sugar. The concentrated form is used internally to prevent gastrointestinal fermentation. (From Stedman, 26th ed)	Not-Available
Lactic-Acid	5	DB03066	-2.96035	0.66627	2.89103	90.078	6.39429	4401	975	4442	238	1459.41	1514	2671.23	3333	A normal intermediate in the fermentation (oxidation, metabolism) of sugar. The concentrated form is used internally to prevent gastrointestinal fermentation. (From Stedman, 26th ed)	Not-Available
6((S)-3-Benzylpiperazin-1-Yl)-3-(Naphthalen-2-Yl)-4-(Pyridin-4-Yl)Pyrazine	0	DB01988	-8.88188	0.55542	6.82343	457.581	6.39402	90	1699	156	239	274.783	72	287.864	109	NA	MAPK14
(1r)-4-[(1e,3e,5e,7z,9e,11z,13e,15e)-17-Hydroxy-3,7,12,16-Tetramethylheptadeca-1,3,5,7,9,11,13,15-Octaen-1-Yl]-3,5,5-Trimethylcyclohex-3-En-1-Ol	0	DB02253	-7.61495	0.17974	6.59783	434.664	6.39394	735	4128	340	240	705.39	407	1010.42	866	NA	sll1541
Flunisolide	4	DB00180	-9.55826	0.50588	6.10715	434.504	6.39229	15	2046	1075	241	298.611	78	320.727	130	Flunisolide (marketed as AeroBid, Nasalide, Nasarel) is a corticosteroid with anti-inflammatory actions. It is often prescribed as treatment for allergic rhinitis and its principle mechanism of action involves activation of glucocorticoid receptors.	NR3C1
Homoserine-Lactone	5	DB02624	-3.26015	0.66272	3.44582	101.105	6.39198	4334	992	4182	242	1444.28	1479	2619.76	3245	NA	SLC9A1
L-Valine	0	DB00161	-3.94744	0.4593	3.27716	117.148	6.39185	4147	2394	4280	243	1792.57	2091	3489.53	4232	A branched-chain essential amino acid that has stimulant activity. It promotes muscle growth and tissue repair. It is a precursor in the penicillin biosynthetic pathway. [PubChem]	PCCB,BCAT1,VARS
N-Methyl-Alpha-Beta-Dehydroalanine	0	DB03920	-3.40899	0.52964	2.88337	101.105	6.39177	4308	1874	4444	244	1720.09	1971	3298.17	4060	NA	NA
Pyridin-3-Ylmethanol	5	DB04145	-3.69935	0.76479	3.4284	109.128	6.38863	4228	458	4194	245	1187.68	1053	2010.06	2329	A direct-acting peripheral vasodilator that causes flushing and may decrease blood pressure. It is used in vasospasm and threatened gangrene. [PubChem]	NA
N~3~-[5-(1H-INDOL-6-YL)-2-(PYRIDIN-2-YLMETHOXY)BENZYL]PYRIDINE-2,3-DIAMINE	0	DB07994	-8.10406	0.19449	6.41669	421.504	6.38806	363	4068	568	246	673.973	372	943.073	786	NA	BACE1
(2S)-1-[4-({6-[(2,6-DIFLUOROPHENYL)AMINO]PYRIMIDIN-4-YL}AMINO)PHENOXY]-3-(DIMETHYLAMINO)PROPAN-2-OL	0	DB07751	-7.04108	0.79456	6.64721	415.444	6.38303	1396	350	288	247	431.778	159	520.134	295	NA	CDK2
5-Bromo-N[2-(Dimethylamino)Ethyl]-9-Aminoacridine-4-Carboxamide	0	DB02390	-7.03398	0.33389	5.99995	389.297	6.38151	1407	3291	1303	248	1106	944	1820.49	2048	NA	NA
[PHENYLALANINYL-PROLINYL]-[2-(PYRIDIN-4-YLAMINO)-ETHYL]-AMINE	0	DB08422	-6.88337	0.15709	5.92869	381.48	6.37959	1633	4223	1443	249	1254.64	1166	2150.92	2568	NA	F2
2,3-Difluorobenzyl-Alcohol	4	DB04312	-4.55333	0.9278	4.18271	144.12	6.37794	3865	52	3679	250	655.701	356	904.262	738	NA	ADH1C
Butyramide	4	DB02121	-2.78429	0.90327	3.63771	87.122	6.37591	4421	89	4043	251	794.917	516	1167.36	1042	NA	amiC
2-ETHOXYETHYL-(2S,3S)-4-((S)-2-BENZYL-3-OXO-4-((3AR,8R,8AS)-2-OXO-3,3A,8,8A-TETRAHYDRO-2H-INDENO[1,2-D]OXAZOL-8-YL)-2,3-DIHYDRO-1H-PYRROL-2-YL)-3-HYDROXY-1-PHENYLBUTAN-2-YLCARBAMATE	2	DB04623	-7.52667	0.10388	6.44157	625.722	6.37511	810	4393	531	252	830.683	552	1236.27	1145	NA	pol
N-Hydroxyguanidine	4	DB03770	-2.7863	0.70712	3.02807	75.071	6.37395	4420	746	4388	253	1383.21	1373	2436.74	2987	NA	NA
S-Methylcysteine	6	DB02216	-3.09992	0.67489	3.55261	135.188	6.37218	4372	921	4107	254	1431.61	1451	2547.74	3148	NA	CTSD,MGMT
2-Pyridinethiol	1	DB03329	-3.3585	0.81561	3.62199	111.169	6.37216	4316	280	4058	255	1057.48	862	1698.96	1842	NA	CTSB
(R)-(+)9B-(3-METHYL)PHENYL-2,3-DIHYDROTHIAZOLO[2,3-A]ISOINDOL-5(9BH)-ONE	5	DB07472	-7.11049	0.46596	5.44746	281.38	6.37073	1286	2354	2319	256	1157.84	1015	1914.77	2189	NA	gag-pol
Hydroxychloroquine	0	DB01611	-6.26318	0.6745	6.0881	335.879	6.36623	2455	925	1121	257	899.359	629	1365.42	1330	A chemotherapeutic agent that acts against erythrocytic forms of malarial parasites.	Not-Available,TLR7,TLR9
3(R)-METHYLCARBAMOYL-7-SULFOAMINO-3,4-DIHYDRO-1H-ISOQUINOLINE-2-CARBOXYLIC-ACID-TERT-BUTYL-ESTER	0	DB07719	-6.82229	0.28612	5.90467	385.442	6.36522	1723	3586	1494	258	1242.27	1141	2097.73	2469	NA	PTPN1
4-Amino-N-{4-[2-(2,6-Dimethyl-Phenoxy)-Acetylamino]-3-Hydroxy-1-Isobutyl-5-Phenyl-Pentyl}-Benzamide	2	DB04373	-7.15064	0.14476	6.15424	531.697	6.36274	1235	4272	978	259	1075.19	896	1728.01	1885	NA	Not-Available
Dimethyl-sulfoxide	0	DB01093	-2.15558	0.86269	3.06671	78.136	6.35988	4480	173	4374	260	968.934	725	1502.22	1547	A highly polar organic liquid, that is used widely as a chemical solvent. Because of its ability to penetrate biological membranes, it is used as a vehicle for topical application of pharmaceuticals. It is also used to protect tissue during cryopreservation. Dimethyl sulfoxide shows a range of pharmacological activity including analgesia and anti-inflammation.	NA
2-Amino-N,3,3-Trimethylbutanamide	2	DB01949	-3.91441	0.69268	4.03002	144.218	6.35694	4157	826	3788	261	1357.38	1322	2351.74	2856	NA	Not-Available
D-Isovaline	8	DB04171	-3.21986	0.59458	3.38964	117.148	6.35589	4343	1419	4222	262	1615.84	1792	2963.22	3688	NA	NA
Quinidine	0	DB00908	-8.48949	0.8348	6.5553	324.424	6.35433	202	229	390	263	262.453	65	262.271	92	An optical isomer of quinine, extracted from the bark of the Cinchona tree and similar plant species. This alkaloid dampens the excitability of cardiac and skeletal muscles by blocking sodium and potassium currents across cellular membranes. It prolongs cellular action potential, and decreases automaticity. Quinidine also blocks muscarinic and alpha-adrenergic neurotransmission.	SCN5A,KCNK1,KCNK6,KCNH2
Benzquinamide	7	DB00767	-6.19481	0.19251	6.0491	404.507	6.35298	2535	4083	1201	264	1345.94	1310	2316.51	2808	Benzquinamide is a discontinued antiemetic compound with antihistaminic, mild anticholinergic, and sedative properties. The mechanism of action is not known, but presumably benzquinamide works via antagonism of muscarinic acetycholine receptors and histamine H1 receptors.	HRH1,CHRM4,CHRM1,CHRM5,CHRM2,CHRM3
N'-(5-CHLORO-1,3-BENZODIOXOL-4-YL)-N-(3,4,5--TRIMETHOXYPHENYL)PYRIMIDINE-2,4-DIAMINE	1	DB07250	-7.25786	0.90177	7.23981	430.848	6.35179	1104	92	21	265	154.19	27	128.724	29	NA	EPHB4
Ethanesulfonic-Acid	0	DB03635	-3.2057	0.57974	3.04716	110.134	6.34956	4346	1519	4383	266	1665.62	1880	3070.01	3827	NA	phnX,PPBP
(1S,6R)-3-{[3-(TRIFLUOROMETHYL)-5,6-DIHYDRO[1,2,4]TRIAZOLO[4,3-A]PYRAZIN-7(8H)-YL]CARBONYL}-6-(2,4,5-TRIFLUOROPHENYL)CYCLOHEX-3-EN-1-AMINE	1	DB08044	-8.17468	0.23522	6.46706	445.367	6.34864	322	3878	496	267	637.697	340	852.41	666	ABT-341 is a potent and selective DPP-4 inhibitor with a structure very similar to sitagliptin (in 2D; the 3D structure is significantly different). [A39406]	DPP4
Irinotecan	5	DB00762	-8.30571	0.35818	6.18716	586.689	6.34863	266	3126	915	268	671.98	368	912.915	750	Irinotecan is an antineoplastic enzyme inhibitor primarily used in the treatment of colorectal cancer. It is a derivative of camptothecin that inhibits the action of topoisomerase I. Irinotecan prevents religation of the DNA strand by binding to topoisomerase I-DNA complex, and causes double-strand DNA breakage and cell death. It is a derivative of camptothecin. Irinotecan was approved for the tr…	TOP1,TOP1MT
2,4-Diamino-4,6-Dihydroxypyrimidine	1	DB02037	-4.5519	0.66844	3.69272	142.118	6.34862	3866	963	3995	269	1414.29	1430	2459.24	3015	NA	NA
1-[4-(4-chlorophenyl)-1-(7H-pyrrolo[2,3-d]pyrimidin-4-yl)piperidin-4-yl]methanamine	0	DB08148	-8.3051	0.33847	6.46531	341.846	6.34846	267	3267	501	270	586.092	280	758.868	553	NA	PRKACA,PKIA
Acetohydroxamic-Acid	8	DB00551	-2.45365	0.69119	3.00582	75.067	6.34793	4458	840	4400	271	1453.65	1501	2544.63	3144	Acetohydroxamic Acid, a synthetic drug derived from hydroxylamine and ethyl acetate, is similar in structure to urea. In the urine, it acts as an antagonist of the bacterial enzyme urease. Acetohydroxamic Acid has no direct antimicrobial action and does not acidify urine directly. It is used, in addition to antibiotics or medical procedures, to treat chronic urea-splitting urinary infections.	ureC,MMP12
O6-(R)-ROSCOVITINE,-R-2-(6-BENZYLOXY-9-ISOPROPYL-9H-PURIN-2-YLAMINO)-BUTAN-1-OL	0	DB04770	-6.98972	0.2453	6.05645	355.442	6.34784	1476	3825	1193	272	1163.41	1027	1888.51	2143	NA	PDXK
Aminoguanidine	8	DB05383	-2.60829	0.79155	3.12837	74.087	6.34657	4442	361	4350	273	1174.72	1043	1910.7	2182	Pimagedine has been developed by Synvista Therapeutics, Inc for the treatment of diabetic kidney disease. It is an advanced glycation end product inhibitor which manages diabetic nephropathy, either alone or in combination with other therapies. It is beneficial in treating patients with diabetic nephropathy.	NA
1-(5-CHLORO-2-METHOXYPHENYL)-3-{6-[2-(DIMETHYLAMINO)-1-METHYLETHOXY]PYRAZIN-2-YL}UREA	2	DB07228	-6.01272	0.32403	5.89023	379.848	6.34604	2733	3358	1520	274	1398.23	1397	2407.25	2936	NA	CHEK1
Lactaldehyde	4	DB03776	-2.5602	0.84025	2.98585	74.079	6.34516	4448	220	4405	275	1043.44	831	1627.46	1757	NA	Not-Available
N-(2-hydroxy-1,1-dimethylethyl)-1-methyl-3-(1H-pyrrolo[2,3-b]pyridin-2-yl)-1H-indole-5-carboxamide	2	DB06834	-6.96991	0.286	5.84818	362.433	6.34508	1507	3587	1596	276	1242.21	1140	2050.97	2382	NA	SYK
Ethyl-Isocyanide	0	DB03399	-2.0351	0.76506	3.04054	56.088	6.34479	4486	457	4387	277	1256.34	1172	2079.61	2433	NA	MB
Tubocurarine	5	DB01199	-9.22539	0.06817	6.79567	609.743	6.34462	43	4466	177	278	311.782	89	323.932	134	A neuromuscular blocker and active ingredient in curare; plant based alkaloid of Menispermaceae.	CHRNA2,HTR3A,ACHE
DIETHYL-(1R,2S,3R,4S)-5,6-BIS(4-HYDROXYPHENYL)-7-OXABICYCLO[2	7	DB08320	-6.47693	0.19412	5.87463	424.449	6.34367	2188	4074	1552	279	1401.65	1406	2400.6	2927	NA	ESR1,NCOA2
3,4-Dimethylaniline	1	DB03018	-4.6642	0.60508	3.8793	121.183	6.34218	3795	1337	3891	280	1533.35	1642	2702.72	3378	NA	cobT
(3E)-5-fluoro-1-[(6-fluoro-4H-1,3-benzodioxin-8-yl)methyl]-1H-indole-2,3-dione-3-oxime	1	DB08011	-8.35732	0.5573	6.07958	346.289	6.34189	248	1689	1143	281	605.632	297	782.305	572	NA	MAPK10
(5Z)-5-[(5-ETHYL-2-FURYL)METHYLENE]-2-{[(S)-(4-FLUOROPHENYL)(1H-TETRAZOL-5-YL)METHYL]AMINO}-1,3-THIAZOL-4(5H)-ONE	2	DB08710	-6.99603	0.35192	6.39262	398.423	6.33769	1463	3179	594	282	939.491	678	1403.16	1397	NA	Not-Available
(S)-TETRAHYDROFURAN-3-YL-(2S,3S)-4-((S)-4-((1R,3R)-3-(2-AMINO-2-OXOETHYL)-2,3-DIHYDRO-1H-INDEN-1-YL)-2-BENZYL-3-OXO-2,3-DIHYDRO-1H-PYRROL-2-YL)-3-HYDROXY-1-PHENYLBUTAN-2-YLCARBAMATE	0	DB04708	-8.35202	0.11422	6.84807	623.75	6.33584	250	4367	143	283	458.471	174	538.46	314	NA	pol
Amcinonide	3	DB00288	-9.19509	0.31714	6.40347	502.579	6.3344	44	3390	582	284	396.254	135	442.784	229	Amcinonide is a corticosteroid.	NR3C1,ANXA1
Glutaric-Acid	2	DB03553	-3.85733	0.29096	3.15957	132.115	6.33414	4179	3557	4337	285	2070.37	2560	4009.73	4485	NA	aspC,gadA,ilvE
Bromocriptine	0	DB01200	-8.78783	0.12128	6.93074	654.606	6.33285	108	4355	108	286	347.177	106	370.35	166	Bromocriptine mesylate is a semisynthetic ergot alkaloid derivative with potent dopaminergic activity. It is indicated for the management of signs and symptoms of Parkinsonian Syndrome. Bromocriptine also inhibits prolactin secretion and may be used to treat dysfunctions associated with hyperprolactinemia. It also causes sustained suppression of somatotropin (growth hormone) secretion in some pat…	HTR2A,HTR1B,HTR2C,DRD5,DRD1,ADRA1A,ADRA1B,ADRA1D,HTR7,DRD2,DRD3,HTR1D,ADRA2A,HTR1A,ADRA2C,ADRA2B,HTR2B,DRD4
4-[8-(3-nitrophenyl)-1,7-naphthyridin-6-yl]benzoic-acid	0	DB08299	-7.80311	0.19336	5.73984	371.352	6.33114	558	4079	1817	287	1043.77	834	1605.15	1711	NA	PDE4A,PDE4B,PDE4D
1,2-Dichloro-Propane	5	DB01701	-2.40317	0.75679	3.44021	112.987	6.33102	4464	497	4188	288	1279	1207	2102.31	2478	NA	linB
1-[4-(4-chlorobenzyl)-1-(7H-pyrrolo[2,3-d]pyrimidin-4-yl)piperidin-4-yl]methanamine	0	DB08149	-7.73352	0.20485	6.35894	355.873	6.3226	627	4019	645	289	827.867	544	1175.75	1056	NA	PRKACA,PKIA
4-{4-[2-(1A,7A-DIMETHYL-4-OXY-OCTAHYDRO-1-OXA-4-AZA-CYCLOPROPA[A]NAPHTHALEN-4-YL)--ACETYLAMINO]-PHENYLCARBAMOYL}-BUTYRIC-ACID	7	DB07882	-6.823	0.25604	6.35237	459.543	6.32218	1720	3762	651	290	1051.31	852	1615.01	1731	NA	IGKC
Propionamide	0	DB04161	-2.78758	0.78319	2.94454	73.095	6.31733	4419	390	4423	291	1220.39	1104	1968.05	2271	NA	NA
Butanoic-Acid	8	DB03568	-2.73697	0.66856	3.10468	88.106	6.31062	4428	960	4360	292	1525.24	1623	2646.4	3286	A four carbon acid, CH3CH2CH2COOH, with an unpleasant odor that occurs in butter and animal fat as the glycerol ester.	BCHE,cumD,Not-Available
6-{[6-(1-methyl-1H-pyrazol-4-yl)[1,2,4]triazolo[4,3-b]pyridazin-3-yl]sulfanyl}quinoline	0	DB08584	-7.98912	0.56581	6.7131	359.418	6.30892	431	1624	232	293	467.041	182	545.57	323	NA	MET
(2e)-N-Allyl-4-{[3-(4-Bromophenyl)-5-Fluoro-1-Methyl-1h-Indazol-6-Yl]Oxy}-N-Methyl-2-Buten-1-Amine	0	DB02139	-6.7475	0.26965	6.11124	444.348	6.30824	1838	3692	1062	294	1206.48	1085	1931.57	2215	NA	shc
Tetrahydrofuran-2-Carboxylic-Acid	8	DB03051	-3.38998	0.62836	3.40078	116.116	6.30769	4312	1185	4212	295	1587.37	1741	2781.6	3478	NA	qheDH,putA
4-Methyl-5-Hydroxyethylthiazole	5	DB02969	-3.68086	0.42386	3.79015	143.211	6.30698	4233	2662	3948	296	1904.94	2285	3543.33	4286	NA	thiM
N-[(1S)-2-amino-1-phenylethyl]-5-(1H-pyrrolo[2,3-b]pyridin-4-yl)thiophene-2-carboxamide	9	DB07812	-6.68529	0.26619	5.83049	362.458	6.30692	1922	3715	1624	297	1362.27	1328	2263.42	2740	NA	AKT2,GSK3B
Acetamide	0	DB02736	-2.42432	0.81716	2.86677	59.068	6.30656	4463	270	4447	298	1124.14	969	1749.92	1917	NA	amiC
Nebivolol	0	DB04861	-7.65805	0.60117	5.95726	405.441	6.30389	694	1364	1394	299	792.551	510	1096.85	953	Nebivolol is a highly cardioselective vasodilatory beta1 receptor blocker used in treatment of hypertension. In most countries, this medication is available only by prescription.	ADRB1,ADRB2
2-{4-[5-(4-chlorophenyl)-4-pyrimidin-4-yl-1H-pyrazol-3-yl]piperidin-1-yl}-2-oxoethanol	1	DB07943	-7.51362	0.61953	6.78648	397.866	6.30294	820	1238	183	300	485.877	194	570.596	346	NA	MAPK14
3-Hydroxyisoxazole-4-Carboxylic-Acid	0	DB02111	-4.32085	0.46815	3.29126	129.071	6.30075	3985	2329	4270	301	1858.44	2213	3409.38	4167	NA	Not-Available
Calcipotriol	0	DB02300	-8.57422	0.54049	6.70508	412.614	6.29972	176	1808	241	302	390.107	126	424.857	212	Calcipotriol (INN) or calcipotriene (USAN) is a sythetic derivative of calcitriol or Vitamin D.	VDR
Tryptophanyl-5'amp	0	DB01831	-8.08512	0.09036	5.30724	533.438	6.29942	376	4421	2531	303	1062.58	875	1614.36	1729	NA	WARS,trpS
5-(2,6-dichlorophenyl)-2-[(2,4-difluorophenyl)sulfanyl]-6H-pyrimido[1,6-b]pyridazin-6-one	4	DB07138	-7.44992	0.52635	6.91643	436.27	6.29829	888	1892	115	304	492.296	202	578.11	359	Neflamapimod has been used in trials studying the treatment of Alzheimer's Disease and Mild Cognitive Impairment.	MAPK14
Adapalene	0	DB00210	-8.9165	0.46912	6.5762	412.529	6.29593	78	2323	364	305	376.605	120	404.031	196	Adapalene is a member of the retinoid drug class that is typically found in topical formulations used for the treatment of acne. It may be used to treat keratosis pilaris as well as other skin conditions as off-label use. It is marketed by Galderma under the trade names Differin and Adaferin.	RARG,RARB,RXRG,RXRB,RARA,RXRA
Formaldehyde	4	DB03843	-1.02779	0.78411	2.62903	30.026	6.2941	4497	385	4488	306	1241.77	1138	1980.67	2288	A highly reactive aldehyde gas formed by oxidation or incomplete combustion of hydrocarbons. In solution, it has a wide range of uses: in the manufacture of resins and textiles, as a disinfectant, and as a laboratory fixative or preservative. Formaldehyde solution (formalin) is considered a hazardous compound, and its vapor toxic. (From Reynolds, Martindale The Extra Pharmacopoeia, 30th ed, p717)	Not-Available
4-Aminobenzoic-Acid	6	DB02362	-4.40444	0.47841	3.24342	137.138	6.29399	3951	2268	4307	307	1855.31	2207	3379.42	4136	A member of the vitamin B complex. It used to be common in sunscreening agents until found to also be a sensitizer. The potassium salt is used therapeutically in fibrotic skin disorders.	pobA,pobA
[1-(4-Fluorobenzyl)Cyclobutyl]Methyl-(1s)-1-[Oxo(1h-Pyrazol-5-Ylamino)Acetyl]Pentylcarbamate	2	DB01858	-6.77606	0.23631	6.44572	444.507	6.29251	1795	3872	525	308	1029.62	818	1539.52	1608	NA	CTSK
3-(2-CHLOROPHENYL)-1-(2-{[(1S)-2-HYDROXY-1,2-DIMETHYLPROPYL]AMINO}PYRIMIDIN-4-YL)-1-(4-METHOXYPHENYL)UREA	0	DB08095	-7.19279	0.57085	7.09494	455.946	6.29218	1184	1591	46	309	404.515	138	442.514	228	NA	MAPK14
[4-(5-naphthalen-2-yl-1H-pyrrolo[2,3-b]pyridin-3-yl)phenyl]acetic-acid	0	DB07837	-8.69106	0.93428	6.64686	378.431	6.29094	140	40	289	310	149.662	25	117.407	23	NA	SGK1
Almitrine	4	DB01430	-6.8716	0.11054	6.177	477.563	6.29094	1652	4381	938	311	1205.42	1081	1893.49	2152	Almitrine is a respiratory stimulant that enhances respiration by acting as an agonist of peripheral chemoreceptors located on the carotid bodies. It is used in the treatment of chronic obstructive pulmonary disease. It is also reported to have a potentially beneficial effect in treating the noctural oxygen desaturation without impairing the quality of sleep.	ATP1A1
5-hydroxyvaleric-acid	4	DB04781	-3.53307	0.61419	3.49556	118.132	6.28992	4278	1271	4149	312	1628.81	1810	2825.6	3534	NA	ALAD
3-Amino-N-{4-[2-(2,6-Dimethyl-Phenoxy)-Acetylamino]-3-Hydroxy-1-Isobutyl-5-Phenyl-Pentyl}-Benzamide	0	DB04378	-7.31423	0.07637	5.78031	531.697	6.28914	1030	4455	1728	313	1255.14	1169	1994.08	2303	NA	Not-Available
4-(1R,3AS,4R,8AS,8BR)-[1-DIFLUOROMETHYL-2-(4-FLUOROBENZYL)-3-OXODECAHYDROPYRROLO[3,4-A]PYRROLIZIN-4-YL]BENZAMIDINE	0	DB07741	-8.2741	0.37544	6.43208	444.501	6.28881	276	2979	546	314	612.739	308	765.698	558	NA	F2
Beclometasone-dipropionate	1	DB00394	-8.68741	0.59344	7.09582	521.05	6.28729	142	1427	45	315	231.504	50	208.918	62	Beclomethasone dipropionate is a second-generation synthetic corticosteroid agent [A179842] and prodrug of an active metabolite beclomethasone 17-monopropionate (17-BMP).[A179839] Beclomethasone dipropionate is a diester of [beclomethasone], which is structurally similar to [dexamethasone].[L6871] Formulations for oral inhalation, intranasal, and topical use are available for beclomethasone dipro…	NR3C1
K-252a	6	DB02152	-8.6075	0.52495	6.71203	467.481	6.28709	169	1901	233	316	392.173	130	421.446	210	NA	MET,MAP2K1
Guanidine	3	DB00536	-2.3257	0.64892	2.79377	59.072	6.28543	4472	1064	4468	317	1611.22	1780	2770.25	3460	A strong organic base existing primarily as guanidium ions at physiological pH. It is found in the urine as a normal product of protein metabolism. It is also used in laboratory research as a protein denaturant. (From Martindale, the Extra Pharmacopoeia, 30th ed and Merck Index, 12th ed) It is also used in the treatment of myasthenia and as a fluorescent probe in HPLC.	argG,GAMT,RNASE1,Not-Available,DLG4,E,ALDH2,rocF
Ethylene-Dichloride	0	DB03733	-2.04196	0.84759	3.23126	98.96	6.28501	4485	200	4313	318	1053.17	855	1569.85	1662	NA	linB
7-methoxy-4-[(6-phenyl[1,2,4]triazolo[4,3-b]pyridazin-3-yl)methoxy]quinoline	0	DB08079	-7.77472	0.24012	6.20911	383.411	6.28393	588	3854	867	319	889.764	618	1252.48	1171	AMG-208 has been used in trials studying the treatment of Cancer, Tumors, Oncology, Prostate Cancer, and Oncology Patients, among others.	Not-Available
Acetylamino-Acetic-Acid	2	DB02713	-3.3415	0.5186	3.21228	117.104	6.28259	4317	1953	4319	320	1847.58	2198	3314.53	4074	NA	thiO
2-(11-{2-[Benzenesulfonyl-(3-Methyl-Butyl)-Amino]-1-Hydroxy-Ethyl}-6,9-Dioxo-2-Oxa-7,10-Diaza-Bicyclo[11	1	DB02411	-7.7796	0.12205	6.61407	588.727	6.28001	580	4350	329	321	718.463	420	939.805	782	NA	gag-pol
3,4-Dihydrouracil	3	DB01849	-3.79699	0.66376	3.58613	114.104	6.27595	4198	987	4085	322	1527.92	1633	2567.54	3173	NA	NA
Adenosine-5'-Pentaphosphate	2	DB02738	-7.13981	0.0433	4.91556	667.14	6.27459	1252	4493	3030	323	1531.78	1640	2573.52	3178	NA	ndx1
(4r)-2-Methylpentane-2,4-Diol	2	DB03564	-3.54549	0.72785	3.2264	118.176	6.27456	4272	642	4316	324	1399.42	1401	2279.03	2768	NA	Not-Available,xylA
Methyl-Isocyanide	3	DB04337	-1.34786	0.76625	2.85832	41.053	6.27395	4495	453	4449	325	1309.92	1258	2084.64	2439	NA	MB
Mibefradil	2	DB01388	-6.43248	0.36601	7.09998	495.639	6.27162	2240	3066	44	326	560.238	259	671.054	464	Mibefradil was withdrawn from the market in 1998 because of potentially harmful interactions with other drugs.	CACNB3,CACNB4,CACNA1G,CACNA1H,CACNA1C,CACNA1D,CACNA1F,CACNA1I,CACNA1S,CACNB1,CACNB2
Rosuvastatin	0	DB01098	-6.59035	0.10425	5.81662	481.546	6.27147	2044	4392	1651	327	1483.75	1554	2456.39	3010	Rosuvastatin is an antilipemic agent that competitively inhibits hydroxymethylglutaryl-coenzyme A (HMG-CoA) reductase. HMG-CoA reducuase catalyzes the conversion of HMG-CoA to mevalonic acid, the rate-limiting step in cholesterol biosynthesis. Rosuvastatin belongs to a class of medications called statins and is used to reduce plasma cholesterol levels and prevent cardiovascular disease.	HMGCR
Idoxuridine	1	DB00249	-6.46149	0.92829	5.72264	354.1	6.26854	2202	48	1845	328	502.901	207	579.898	362	An analog of deoxyuridine that inhibits viral DNA synthesis. The drug is used as an antiviral agent.	Not-Available,TK
GLYCYLALANYL-N-2-NAPHTHYL-L-PROLINEAMIDE	1	DB07813	-7.5596	0.28771	5.79266	368.437	6.26799	780	3580	1701	329	1118.07	963	1680.97	1819	NA	ptpA
(2S)-N-[(3S)-1-(2-AMINO-2-OXOETHYL)-2-OXO-1,2,3,4-TETRAHYDROQUINOLIN-3-YL]-2-CHLORO-2H-THIENO[2,3-B]PYRROLE-5-CARBOXAMIDE	0	DB07793	-7.83667	0.33189	6.08266	402.863	6.2676	530	3307	1135	330	900.129	630	1257.68	1184	NA	PYGM
Vinylglycine	0	DB03214	-3.53412	0.49003	3.01425	101.105	6.26748	4276	2171	4395	331	1917	2307	3442.59	4193	Vinylglycine is an irreversible inhibitor of aspartate aminotransferase.	ACCS,IL4I1
Pyruvamide	1	DB03578	-2.89944	0.68385	3.11364	87.078	6.26657	4409	880	4353	332	1538.82	1654	2565.69	3170	NA	NA
5-{[1-(2,3-dichlorobenzyl)piperidin-4-yl]methoxy}quinazoline-2,4-diamine	0	DB07643	-8.22664	0.15423	6.2057	432.355	6.26384	300	4237	873	333	779.668	498	1035.3	888	NA	DCPS
1-tert-butyl-3-(3-methylbenzyl)-1H-pyrazolo[3,4-d]pyrimidin-4-amine	1	DB08699	-6.92605	0.96423	6.75096	295.39	6.26095	1574	7	203	334	165.324	31	130.777	30	NA	CAMK2G
FR236913	0	DB02830	-7.72951	0.2267	6.06624	446.511	6.26069	631	3925	1176	335	993.872	765	1428.1	1437	NA	ADA
5-Chloro-1h-Indole-2-Carboxylic-Acid-[1-(4-Fluorobenzyl)-2-(4-Hydroxypiperidin-1yl)-2-Oxoethyl]Amide	0	DB03383	-8.27589	0.25498	6.25339	443.906	6.25948	272	3772	804	336	725.578	427	937.847	781	NA	PYGM
2,4-Difluorobenzyl-Alcohol-2,4-Difluoro-1-(Hydroxymethyl)Benzene	6	DB04448	-4.44363	0.45945	3.61923	144.12	6.25904	3929	2393	4062	337	1894.08	2260	3367.61	4122	NA	ADH1C
N-Propyl-Isocyanide	1	DB04050	-2.29529	0.86369	3.39243	69.107	6.25775	4473	168	4217	338	1017.32	792	1468.83	1497	NA	MB
1,3-Thiazole-4-Carboxylic-Acid	2	DB03422	-3.52074	0.58886	3.39153	129.14	6.25692	4284	1458	4219	339	1728.84	1983	2975.81	3715	NA	NA
Atorvastatin	0	DB01076	-7.69263	0.14603	6.43471	558.65	6.25634	659	4267	540	340	847.657	568	1149.39	1017	Atorvastatin is a member of the statins firstly synthesized in 1985 by Dr. Bruce Roth and FDA approved in 1996.[T568] It is a pentasubstituted pyrrole[A177415] formed by two contrasting moieties with an achiral heterocyclic core unit and a 3,5-dihydroxypentanoyl side chain identical to its parent compound.[T571] Unlike other members of the statin group, atorvastatin is an active compound and henc…	HMGCR,DPP4,AHR
1-Methylimidazole	2	DB02671	-2.5876	0.57389	3.32479	83.114	6.25617	4445	1572	4250	341	1783.89	2073	3096.74	3857	NA	MB,fixL
Fluticasone-Propionate	0	DB00588	-8.77419	0.69429	6.99943	500.579	6.25338	110	818	68	342	213.88	43	182.902	49	Fluticasone propionate is a synthetic glucocorticoid[F4355,F4358][FDA Label]. These drugs are available as inhalers, nasal, sprays, and topical treatments for various inflammatory indications[F4355,F4358][FDA Label]. Fluticasone propionate was first approved in 1990[L5962].	NR3C1,PGR,PLA2G4A,NR3C2
3-(5-{[4-(AMINOMETHYL)PIPERIDIN-1-YL]METHYL}-1H-INDOL-2-YL)QUINOLIN-2(1H)-ONE	1	DB07025	-8.2617	0.34696	6.12997	386.499	6.25212	286	3207	1026	343	753.749	471	979.95	824	NA	CHEK1
Dutasteride	6	DB01126	-9.01758	0.26933	7.09078	528.537	6.25206	65	3696	48	344	250.964	58	225.924	71	Dutasteride is an oral synthetic 4-azasteroid commonly marketed under the trade name Avodart. It is a novel dual 5伪-reductase inhibitor that works by blocking both isoforms of 5伪-reductase enzymes in a potent, selective, and irreversible manner.[A1909] Type I and II 5伪-reductase enzymes convert testosterone into dihydrotestosterone (DHT), a primary hormonal mediator that plays a role in the devel…	SRD5A2,SRD5A1
5-Fluorolevulinic-Acid	3	DB02828	-3.559	0.385	3.4032	134.106	6.25102	4269	2923	4210	345	2063.31	2548	3745.23	4415	NA	hemB
4-Hydroxy-2-Butanone	0	DB04094	-3.30558	0.81301	2.87346	88.106	6.25024	4327	292	4446	346	1180.74	1048	1777.65	1966	NA	FKBP1A
1-((2-HYDROXYETHOXY)METHYL)-5-(3-(BENZYLOXY)BENZYL)PYRIMIDINE-2,4(1H,3H)-DIONE	0	DB06873	-7.17069	0.54449	6.04695	382.416	6.24983	1214	1782	1204	347	975.036	741	1375.89	1348	NA	udp
L-2-amino-3-butynoic-acid	5	DB04217	-3.33052	0.76736	3.44452	99.089	6.24786	4319	449	4183	348	1296.21	1231	2009.27	2328	NA	CTH,sufS
5-CHLORO-THIOPHENE-2-CARBOXYLIC-ACID-((3S,4S)-4-FLUORO--1-{[2-FLUORO-4-(2-OXO-2H-PYRIDIN-1-YL)-PHENYLCARBAMOYL]-METHYL}-PYRROLIDIN-3-YL)-AMIDE	7	DB08143	-6.6253	0.17213	5.9955	492.935	6.24674	2005	4155	1314	349	1398.06	1396	2220.38	2676	NA	F10
6-MORPHOLIN-4-YL-9H-PURINE	1	DB08780	-4.84974	0.89714	5.04961	205.221	6.24624	3679	99	2879	350	778.339	495	1015.94	873	NA	CHEK1
Ethionamide	3	DB00609	-4.31891	0.86547	4.46935	166.249	6.24519	3986	160	3425	351	935.742	671	1297.5	1245	A second-line antitubercular agent that inhibits mycolic acid synthesis. It also may be used for treatment of leprosy. (From Smith and Reynard, Textbook of Pharmacology, 1992, p868)	inhA,katG
Dpb-T	0	DB02217	-7.64316	0.54538	5.4975	410.319	6.24408	712	1775	2240	352	999.119	769	1414.63	1415	NA	NT5M
2-(6-CHLORO-3-{[2,2-DIFLUORO-2-(2-PYRIDINYL)ETHYL]AMINO}-2-OXO-1(2H)-PYRAZINYL)-N-[(2-FLUORO-3-METHYL-6-PYRIDINYL)METHYL]ACETAMIDE	1	DB07549	-7.14977	0.07905	6.34951	448.449	6.24351	1237	4447	654	353	1061.57	869	1532.28	1597	NA	F2
(1S,2R,5S)-5-[3-(TRIFLUOROMETHYL)-5,6-DIHYDRO[1,2,4]TRIAZOLO[4,3-A]PYRAZIN-7(8H)-YL]-2-(2,4,5-TRIFLUOROPHENYL)CYCLOHEXANAMINE	2	DB07072	-7.9382	0.3149	6.51249	419.373	6.242	464	3411	441	354	705.035	405	887.046	709	NA	DPP4
(4R,2S)-5'-(4-(4-CHLOROBENZYLOXY)PYRROLIDIN-2-YLMETHANESULFONYL)ISOQUINOLINE	1	DB07583	-7.32423	0.81556	6.83366	431.945	6.2365	1019	281	149	355	350.811	108	349.426	152	NA	PRKACA,PKIA
4-Amido-4-Carbamoyl-Butyric-Acid	0	DB03091	-4.4869	0.50022	3.8987	146.146	6.23391	3900	2090	3876	356	1831.31	2162	3161.29	3921	NA	atpF
Paliperidone	1	DB01267	-8.23694	0.15181	6.50607	426.492	6.23244	295	4248	449	357	669.469	367	825.564	629	Paliperidone is the primary active metabolite of risperidone. The mechanism of action is unknown but it is likely to act via a similar pathway to risperidone. It has been proposed that the drug's therapeutic activity in schizophrenia is mediated through a combination of central dopamine Type 2 (D2) and serotonin Type 2 (5HT2A) receptor antagonism. Paliperidone is also active as an antagonist at a…	ADRA2A,ADRA2B,ADRA2C,HTR1A,DRD1,CYP3A4,CYP2D6,CYP3A5,HTR2A,DRD2,HRH1,ADRA1A,ADRA1B,DRD4,HTR1D,DRD3,HTR2C
Isoquinoline	1	DB04329	-4.77655	0.80026	4.02043	129.162	6.23089	3728	333	3792	358	1139.38	991	1675.96	1814	NA	NA
Fosaprepitant	0	DB06717	-9.01762	0.16606	6.234	614.411	6.23053	64	4183	830	359	531.447	228	605.688	390	Fosaprepitant is an intravenously administered antiemetic drug. It is a prodrug of Aprepitant. It aids in the prevention of acute and delayed nausea and vomiting associated with chemotherapy treatment.	TACR1
Bis-Napthyl-Beta-Ketophosphonic-Acid	9	DB02360	-7.48991	0.16035	4.95133	376.348	6.22969	845	4208	2984	360	1398	1395	2197.41	2638	NA	CTSG
Aminolevulinic-acid	0	DB00855	-4.10248	0.36732	3.46982	131.131	6.22968	4085	3056	4172	361	2082.33	2584	3734.48	4410	A compound produced from succinyl-CoA and glycine as an intermediate in heme synthesis. It is used as a photochemotherapy for actinic keratosis. [PubChem]	ALAD
5-(3,5-DICHLOROPHENYL)THIO-4-ISOPROPYL-1-(PYRIDIN-4-YL-METHYL)-1H-IMIDAZOL-2-YL-METHYL-CARBAMATE	2	DB08502	-6.83939	0.15432	6.40649	451.379	6.2283	1692	4236	577	362	1106.14	945	1605.13	1710	NA	gag-pol
(2R)-1-[4-({6-[(2,6-DIFLUOROPHENYL)AMINO]PYRIMIDIN-4-YL}AMINO)PHENOXY]-3-(DIMETHYLAMINO)PROPAN-2-OL	1	DB07761	-7.05239	0.81315	6.63604	415.444	6.22743	1380	291	299	363	456.917	173	493.342	278	NA	CDK2
Malonic-acid	0	DB02175	-3.3246	0.5014	2.89832	104.061	6.22688	4321	2079	4439	364	1951.89	2367	3416.45	4172	NA	rsbQ,panD,SRC,SCO1207,SNRPA,Not-Available,rimL
3-bromo-5-phenyl-N-(pyrimidin-5-ylmethyl)pyrazolo[1,5-a]pyridin-7-amine	0	DB08536	-7.14932	0.33362	6.2399	380.249	6.22688	1239	3293	821	365	1051.54	853	1496.24	1531	NA	CDK2
Cefaclor	0	DB00833	-7.65039	0.5333	5.71461	367.814	6.22638	705	1849	1856	366	970.055	731	1342.46	1304	Semisynthetic, broad-spectrum antibiotic derivative of cephalexin.	pbp3,pbpA
3-(3,5-Dibromo-4-Hydroxy-Benzoyl)-2-Ethyl-Benzofuran-6-Sulfonic-Acid-(4-Sulfamoyl-Phenyl)-Amide	3	DB02259	-8.17564	0.7587	7.2144	658.346	6.22552	320	482	28	367	199.529	38	162.849	41	NA	PTPN1
Tetramethylammonium-Ion	8	DB03095	-1.97267	0.57109	3.01411	74.147	6.2236	4487	1590	4396	368	1843.17	2186	3153.58	3912	NA	GALE
N-Carbamyl-D-Valine	0	DB01847	-4.41783	0.62082	4.04161	160.173	6.22349	3945	1234	3781	369	1614.35	1789	2640.32	3278	NA	Not-Available
Monothioglycerol	7	DB03864	-2.65792	0.83898	3.27541	108.162	6.22295	4433	224	4283	370	1120.02	964	1620.19	1741	NA	PREP
Alvimopan	2	DB06274	-7.97967	0.40008	6.59603	424.541	6.22264	438	2826	342	371	629.523	329	750.857	544	Alvimopan is a peripherally acting 渭 opioid antagonist. It is used to avoid postoperative ileus following small or large bowel resection and accelerates the gastrointestinal recovery period.	OPRM1,OPRK1,OPRD1
(4Z)-2,8:7,12:11,15:14,18:17,22-PENTAANHYDRO-4,5,6,9,10,13,19,20,21-NONADEOXY-D-ARABINO-D-ALLO-D-ALLO-DOCOSA-4,9,20-TRIENITOL	0	DB07716	-8.66719	0.46066	5.74727	422.474	6.22249	148	2385	1803	372	697.545	392	860.165	675	NA	IGKC
Ketazolam	0	DB01587	-8.87794	0.31376	5.86128	368.82	6.22218	91	3419	1568	373	653.129	352	787.219	582	Ketazolam is a benzodiazepine derivative with anxiolytic, anticonvulsant, sedative and skeletal muscle relaxant activity. Ketazolam is not approved in Canada or America.	TSPO,GABRA1,GABRB1,GABRG1,GABRD,GABRE
[4-({5-(AMINOCARBONYL)-4-[(3-METHYLPHENYL)AMINO]PYRIMIDIN-2-YL}AMINO)PHENYL]ACETIC-ACID	4	DB08513	-7.07774	0.81786	6.80218	377.404	6.22195	1331	266	172	374	388.477	124	393.426	186	NA	MAPK1,INSR,IRS1
1,1,1-TRIFLUORO-3-((N-ACETYL)-L-LEUCYLAMIDO)-4-PHENYL-BUTAN-2-ONE(N-ACETYL-L-LEUCYL-L-PHENYLALANYL-TRIFLUOROMETHYL-KETONE)	4	DB08119	-6.21382	0.26331	5.57357	372.387	6.22121	2514	3730	2112	375	1650.82	1857	2705.55	3384	NA	CTRB1
D-Methionine	0	DB02893	-3.79649	0.50483	3.54889	149.215	6.22121	4199	2055	4108	376	1910.71	2299	3284.95	4049	NA	METAP2,VC_1968
2-Methyl-2-Propanol	0	DB03900	-2.89356	0.79236	2.91492	74.123	6.22067	4410	358	4434	377	1274.57	1203	1912.96	2185	NA	RNASE1,TPI1,METAP2,bphC,CALM1
N~4~-(3-methyl-1H-indazol-6-yl)-N~2~-(3,4,5-trimethoxyphenyl)pyrimidine-2,4-diamine	1	DB08519	-7.09649	0.56311	6.56984	406.446	6.22049	1304	1642	372	378	740.75	453	926.968	767	NA	KDR
2-amino-N-(4-methyl-1,3-thiazol-2-yl)-5-[(4-methyl-4H-1,2,4-triazol-3-yl)sulfanyl]benzamide	0	DB07358	-6.75322	0.27779	6.01565	346.441	6.22012	1826	3638	1264	379	1335.63	1288	2032.53	2356	NA	GCK
2-{[4-(1-methyl-4-pyridin-4-yl-1H-pyrazol-3-yl)phenoxy]methyl}quinoline	1	DB08387	-7.62856	0.2114	6.10791	392.462	6.2198	726	3984	1068	380	1040.88	830	1456.38	1476	NA	PDE10A
1-(3-chloro-4-methylphenyl)-3-{2-[({5-[(dimethylamino)methyl]-2-furyl}methyl)thio]ethyl}urea	0	DB08027	-6.03425	0.17459	5.35296	381.929	6.21914	2713	4143	2457	381	1801.04	2104	3022.66	3774	NA	gag-pol
3,4-DI-1H-INDOL-3-YL-1H-PYRROLE-2,5-DICARBOXYLIC-ACID	1	DB07588	-7.69666	0.11406	5.66522	385.379	6.21913	657	4368	1960	382	1210.71	1093	1778.42	1967	NA	staP
Dimethylformamide	0	DB01844	-2.36874	0.64019	2.80889	73.095	6.21911	4466	1114	4463	383	1707.68	1950	2810.67	3510	NA	CELA1,REN
4-[(5-bromopyridin-2-yl)amino]-4-oxobutanoic-acid	3	DB08578	-5.00188	0.4548	4.76025	273.086	6.21695	3579	2430	3167	384	1803.38	2109	3019.99	3768	NA	Not-Available
Trimethyl-Glycine	8	DB04455	-2.7924	0.57062	3.40842	118.156	6.21526	4417	1594	4206	385	1837.54	2174	3093.82	3855	A naturally occurring compound that has been of interest for its role in osmoregulation. As a drug, betaine hydrochloride has been used as a source of hydrochloric acid in the treatment of hypochlorhydria. Betaine has also been used in the treatment of liver disorders, for hyperkalemia, for homocystinuria, and for gastrointestinal disturbances. (From Martindale, The Extra Pharmacopoeia, 30th ed, …	proX,kaiB
Altretamine	0	DB00488	-4.44315	0.24146	4.25789	210.285	6.21284	3930	3846	3632	386	2145.53	2686	3800.57	4430	An alkylating agent proposed as an antineoplastic. It also acts as a chemosterilant for male houseflies and other insects.	Not-Available
Doxapram	4	DB00561	-6.83423	0.24525	5.84015	378.516	6.21161	1701	3827	1609	387	1418.92	1438	2187.96	2625	A central respiratory stimulant with a brief duration of action. (From Martindale, The Extra Pharmocopoeia, 30th ed, p1225)	KCNK3,KCNK9
Haloprogin	1	DB00793	-5.04899	0.60894	5.35011	361.393	6.21094	3553	1307	2468	388	1452.15	1498	2254.61	2727	Haloprogin is used as a topical ointment or cream in the treatment of Tinea infections. Tinea infections are superficial fungal infections caused by three species of fungi collectively known as dermatophytes (Trichophyton, Microsporum and Epidermophyton). Commonly these infections are named for the body part affected, including tinea corporis (general skin), tinea cruris (groin), and tinea pedis …	NA
3(S)-METHYLCARBAMOYL-7-SULFOAMINO-3,4-DIHYDRO-1H-ISOQUINOLINE-2-CARBOXYLIC-ACID-TERT-BUTYL-ESTER	0	DB06887	-6.80003	0.31231	5.95859	385.442	6.21094	1762	3433	1392	389	1345.29	1309	2034.42	2360	NA	PTPN1
(2R)-1-[(5,6-DIPHENYL-7H-PYRROLO[2,3-D]PYRIMIDIN-4-YL)AMINO]PROPAN-2-OL	8	DB07647	-6.68014	0.53738	6.34781	344.418	6.20828	1927	1826	656	390	974.065	737	1321.59	1280	NA	CHEK1
2,4,6-Triaminoquinazoline	0	DB02532	-6.04003	0.90203	4.62617	175.195	6.20721	2702	91	3280	391	749.367	465	930.822	774	NA	PTR1,DHRS4L1
Aprepitant	3	DB00673	-8.58023	0.155	6.13005	534.432	6.20634	175	4233	1025	392	738.625	451	912.298	746	Aprepitant, an antiemetic, is a substance P/neurokinin 1 (NK1) receptor antagonist which, in combination with other antiemetic agents, is indicated for the prevention of acute and delayed nausea and vomiting associated with initial and repeat courses of highly emetogenic cancer chemotherapy. Aprepitant is a selective high-affinity antagonist of human substance P/neurokinin 1 (NK1) receptors. Apre…	TACR1
Cyclohexylammonium-Ion	9	DB02995	-3.29146	0.47739	3.68087	100.185	6.20504	4332	2269	4004	393	1983.14	2426	3401.51	4158	NA	murA
N'-(5-CHLORO-1,3-BENZODIOXOL-4-YL)-N-(3-MORPHOLIN-4-YLPHENYL)PYRIMIDINE-2,4-DIAMINE	0	DB07255	-7.99307	0.89988	7.23074	425.876	6.20494	428	94	25	394	141.092	21	100.193	17	NA	EPHB4
(9BETA,13ALPHA,14BETA,17ALPHA)-2-METHOXYESTRA-1,3,5(10)-TRIENE-3,17-DIYL-DISULFAMATE	0	DB08416	-8.14584	0.41767	6.75926	460.574	6.20194	335	2711	197	395	515.596	219	563.482	341	NA	CA2
2'-deoxy-N-(naphthalen-1-ylmethyl)guanosine-5'-(dihydrogen-phosphate)	8	DB08237	-7.41461	0.13961	5.77537	487.409	6.20014	927	4292	1743	396	1287.31	1219	1906.98	2177	NA	POLK
BETA-METHYLLACTOSIDE	0	DB04681	-7.75228	0.43163	4.04529	356.324	6.19992	604	2596	3777	397	1238.28	1133	1809.24	2024	NA	ABO
(2S)-1-[4-({4-[(2,5-DICHLOROPHENYL)AMINO]PYRIMIDIN-2-YL}AMINO)PHENOXY]-3-(DIMETHYLAMINO)PROPAN-2-OL	1	DB07755	-6.91429	0.70634	6.8107	448.354	6.19965	1591	748	164	398	527.928	223	580.059	363	NA	CDK2
Spirapril	0	DB01348	-6.53709	0.08049	5.31766	466.625	6.19934	2118	4444	2508	399	1751.86	2021	2868.64	3580	Spirapril is an ACE inhibitor antihypertensive drug used to treat hypertension. Spirapril is converted to the active spiraprilat after administration. ACE inhibitors are used primarily in treatment of hypertension and congestive heart failure.	ACE
N~4~-methyl-N~4~-(3-methyl-1H-indazol-6-yl)-N~2~-(3,4,5-trimethoxyphenyl)pyrimidine-2,4-diamine	0	DB08042	-7.1953	0.2816	6.43558	420.473	6.19875	1180	3613	537	400	978.241	748	1317.98	1276	NA	KDR
D-Cysteine	1	DB00151	-3.21573	0.68008	3.37002	121.161	6.19776	4345	901	4233	401	1605.56	1770	2549.5	3152	A thiol-containing non-essential amino acid that is oxidized to form cystine.	SLC19A3,CARS2,CSAD,NFS1,CDO1,GCLM,GCLC,CDO-1,GOT1,CTH,CBS,CARS,MGMT,GSS
L-Cysteine	0	DB00151	-3.29732	0.544	3.05232	121.161	6.19776	4331	1786	4379	402	1920.96	2318	3235.55	3997	A thiol-containing non-essential amino acid that is oxidized to form cystine.	SLC19A3,CARS2,CSAD,NFS1,CDO1,GCLM,GCLC,CDO-1,GOT1,CTH,CBS,CARS,MGMT,GSS
PYRIMIDINE-4,6-DICARBOXYLIC-ACID-BIS-(4-FLUORO-3-METHYL-BENZYLAMIDE)	1	DB04760	-7.75936	0.1541	5.95589	410.424	6.19743	599	4238	1399	403	1093.77	928	1525.7	1587	NA	MMP13
1-(5-{2-[(1-methyl-1H-pyrazolo[4,3-d]pyrimidin-7-yl)amino]ethyl}-1,3-thiazol-2-yl)-3-[3-(trifluoromethyl)phenyl]urea	2	DB07362	-7.45507	0.50193	6.53678	462.461	6.19597	881	2075	403	404	738.618	450	903.163	734	NA	AURKA
Beta-Amino-Isobutyrate	2	DB03432	-3.4202	0.52935	3.29609	102.113	6.19591	4303	1876	4268	405	1932.73	2332	3253.94	4019	NA	NA
Lopinavir	3	DB01601	-7.18871	0.13264	6.52368	628.814	6.19494	1188	4307	422	406	967.626	721	1292.51	1235	Lopinavir is an antiretroviral belonging to the _protease inhibitor_ class. It is marketed by Abbott as Kaletra, a co-formulation with a sub-therapeutic dose of ritonavir, as a component of combination therapy to treat HIV/AIDS.	HIV-1-protease
(2S)-6-(2,4-DIAMINO-6-ETHYLPYRIMIDIN-5-YL)-2-(3,5-DIFLUOROPHENYL)-4-(3-METHOXYPROPYL)-2H-1,4-BENZOXAZIN-3(4H)-ONE	0	DB07113	-7.6713	0.37756	6.91071	469.492	6.19471	683	2967	116	407	556.157	254	617.161	399	NA	REN
BENZYL-6-BENZYL-5,7-DIOXO-6,7-DIHYDRO-5H-[1,3]THIAZOLO[3,2-C]PYRIMIDINE-2-CARBOXYLATE	0	DB08561	-7.21651	0.14639	5.88257	392.436	6.19391	1156	4265	1537	408	1326.03	1276	1964.19	2267	NA	MMP13
N-ETHYL-N-ISOPROPYL-3-METHYL-5-{[(2S)-2-(PYRIDIN-4-YLAMINO)PROPYL]OXY}BENZAMIDE	3	DB07279	-6.10406	0.24742	5.76175	355.482	6.19287	2636	3810	1764	409	1640.68	1835	2606.89	3230	NA	F2
PD173955	0	DB02567	-8.61748	0.94219	7.39057	443.359	6.19282	167	27	8	410	62.0138	5	33.0413	4	NA	ABL
7-(5-DEOXY-BETA-D-RIBOFURANOSYL)-5-IODO-7H-PYRROLO[2,3-D]PYRIMIDIN-4-AMINE	1	DB07173	-6.76988	0.86737	5.64794	376.154	6.19163	1803	157	1990	411	693.661	389	825.878	631	NA	ADK
Levothyroxine	0	DB00451	-6.42436	0.21817	6.11561	776.872	6.19118	2248	3962	1053	412	1402.04	1408	2108.85	2484	"Levothyroxine is a synthetically produced form of thyroxine, a major endogenous hormone secreted by the thyroid gland.[F4633] Also known as L-thyroxine or the brand name product Synthroid, levothyroxine is used primarily to treat hypothyroidism, a condition where the thyroid gland is no longer able to produce sufficient quantities of the thyroid hormones T<sub>4</sub> (tetraiodothyronine or thyr…	THRA,THRB
3-Phenyl-1,2-Propandiol	0	DB02803	-4.99718	0.29709	3.57437	152.193	6.19082	3582	3520	4093	413	2148.65	2695	3723.09	4404	NA	REN
4-Aminophthalhydrazide	1	DB02041	-5.92102	0.62033	4.4024	177.163	6.19044	2835	1236	3487	414	1499.71	1582	2303.25	2794	NA	tgt
4-(2-{[4-{[3-(4-Chlorophenyl)Propyl]Sulfanyl}-6-(1-Piperazinyl)-1,3,5-Triazin-2-Yl]Amino}Ethyl)Phenol	3	DB04020	-6.96628	0.14421	6.60839	485.057	6.18888	1513	4276	332	415	971.663	734	1290.24	1233	NA	ESR2
M-Cresol	0	DB01776	-4.47572	0.74499	3.32863	108.14	6.18872	3908	552	4248	416	1397.31	1393	2092.63	2461	NA	INS
Oxamic-Acid	1	DB03940	-3.0456	0.57446	2.89365	89.05	6.1883	4382	1563	4441	417	1887.17	2251	3121.55	3886	Amino-substituted glyoxylic acid derivative. [PubChem]	Not-Available,ldh,LDHA,LDHB,pflB,Not-Available
7-PYRIDIN-2-YL-N-(3,4,5-TRIMETHOXYPHENYL)-7H-PYRROLO[2,3-D]PYRIMIDIN-2-AMINE	7	DB07248	-6.26183	0.15278	6.10522	377.404	6.18819	2458	4243	1081	418	1473.38	1536	2242.3	2703	NA	PTK2
Dextroamphetamine	1	DB01576	-4.58537	0.40498	3.50636	135.21	6.18791	3847	2791	4140	419	2077.42	2572	3542.37	4285	Dextroamphetamine is the dextrorotary enantiomer of amphetamine[A2505]. Dextroamphetamine was approved by the FDA in 2001 for the treatment of attention deficit hyperactivity disorder[L6010,Label].	SLC18A2,SLC6A2,SLC6A3,TAAR1,ADRA1A,ADRA1B
L-Phenylalanine	8	DB00120	-4.67084	0.64665	4.13465	165.192	6.18702	3792	1075	3716	420	1588.18	1745	2474.29	3033	An essential aromatic amino acid that is a precursor of melanin; dopamine; noradrenalin (norepinephrine), and thyroxine.	TAT,SLC7A8,FARSA,PAH,FARS2,FARSB,TH
[Methylthio]Acetate	0	DB03517	-2.58397	0.64147	3.07922	105.138	6.18617	4446	1101	4368	421	1732.13	1986	2775.53	3472	NA	soxA
Nicergoline	3	DB00699	-8.06111	0.67546	6.96171	484.394	6.18498	395	919	87	422	339.771	98	316.09	122	An ergot derivative that has been used as a cerebral vasodilator and in peripheral vascular disease. It has been suggested to ameliorate cognitive deficits in cerebrovascular disease.	ADRA1A
Thymine	0	DB03462	-4.3267	0.69167	3.5245	126.115	6.18323	3984	833	4120	423	1550.78	1673	2391.23	2913	NA	phr,deoA
Succinic-acid	0	DB00139	-3.87947	0.56696	2.84188	118.088	6.18293	4168	1618	4455	424	1889.21	2255	3108.74	3875	A water-soluble, colorless crystal with an acid taste that is used as a chemical intermediate, in medicine, the manufacture of lacquers, and to make perfume esters. It is also used in foods as a sequestrant, buffer, and a neutralizing agent. (Hawley's Condensed Chemical Dictionary, 12th ed, p1099; McGraw-Hill Dictionary of Scientific and Technical Terms, 4th ed, p1851)	SLC13A2,SLC13A1,SUCLG2,SDHD,P4HA2,PLOD3,BBOX1,P4HA1,SDHB,ALDH5A1,SDHC,SUCLG1,OXCT1,PLOD1,ASPH,LEPRE1,LEPREL1,LEPREL2,SUCNR1,OXCT2,TMLHE,SUCLA2,SLC25A10,SDHA,HSD17B6,SLC13A3
3-Methoxybenzamide	0	DB03073	-4.68741	0.75963	3.71667	151.165	6.18207	3779	478	3981	425	1322.2	1271	1930.19	2213	NA	PARP1
Isovaleric-Acid	6	DB03750	-3.21623	0.69051	3.32063	102.133	6.18051	4344	848	4252	426	1607.21	1774	2502.03	3073	NA	cumD,aspC,pcp
Sertraline	1	DB01104	-7.43424	0.6229	6.22459	306.236	6.18045	911	1225	843	427	796.118	518	979.852	823	Sertraline hydrochloride belongs to a class of antidepressant agents known as selective serotonin-reuptake inhibitors (SSRIs). Despite distinct structural differences between compounds in this class, SSRIs possess similar pharmacological activity. As with other antidepressant agents, several weeks of therapy may be required before a clinical effect is seen. SSRIs are potent inhibitors of neuronal…	SLC6A4,SLC6A3
(1S,4S)-4-(3,4-dichlorophenyl)-N-methyl-1,2,3,4-tetrahydronaphthalen-1-amine	0	DB01104	-7.55912	0.41718	5.992	306.236	6.18045	781	2714	1322	428	1046.49	842	1409.82	1406	Sertraline hydrochloride belongs to a class of antidepressant agents known as selective serotonin-reuptake inhibitors (SSRIs). Despite distinct structural differences between compounds in this class, SSRIs possess similar pharmacological activity. As with other antidepressant agents, several weeks of therapy may be required before a clinical effect is seen. SSRIs are potent inhibitors of neuronal…	SLC6A4,SLC6A3
2-Methylleucine	8	DB04063	-3.73966	0.63796	3.924	145.202	6.17985	4216	1125	3860	429	1674.07	1894	2635.6	3269	NA	ilvE
Carvedilol	0	DB01136	-6.73175	0.22704	5.67263	406.482	6.17978	1857	3922	1943	430	1570.6	1708	2418.79	2954	Carvedilol is a non-selective beta blocker indicated in the treatment of mild to moderate congestive heart failure (CHF). It blocks beta-1 and beta-2 adrenergic receptors as well as the alpha-1 adrenergic receptors.	ADRB1,ADRA1A,NDUFC2,ADRB2,VEGFA,NPPB,GJA1,KCNH2,VCAM1
2,6-Diaminoquinazolin-4(3h)-One	0	DB03505	-6.17087	0.82687	4.38623	176.179	6.17956	2563	250	3505	431	991.89	764	1309.56	1263	NA	tgt
Quinine	0	DB00468	-8.30574	0.4576	6.18603	324.424	6.17922	265	2407	917	432	708.996	411	836.303	645	An alkaloid derived from the bark of the cinchona tree. It is used as an antimalarial drug, and is the active ingredient in extracts of the cinchona that have been used for that purpose since before 1633. Quinine is also a mild antipyretic and analgesic and has been used in common cold preparations for that purpose. It was used commonly and as a bitter and flavoring agent, and is still useful for…	Not-Available,GP9,KCNN4
2s,3s-3-Methylaspartic-Acid	5	DB04313	-3.89694	0.71726	3.84083	147.13	6.17846	4162	698	3914	433	1489.59	1570	2248.67	2715	NA	NA
3-Methyl-Aspartic-Acid	4	DB04313	-4.06136	0.58596	3.65254	147.13	6.17846	4101	1479	4031	434	1804.85	2111	2902.4	3616	NA	NA
2-{[(1R,2S)-2-aminocyclohexyl]amino}-4-[(3-methylphenyl)amino]pyrimidine-5-carboxamide	6	DB08361	-7.17616	0.7183	6.65184	340.431	6.17832	1207	691	283	435	566.064	263	618.003	400	NA	SYK
4-Fluorophenethyl-Alcohol	7	DB03669	-4.34827	0.75208	3.77831	140.157	6.17778	3971	514	3954	436	1369.61	1346	2005.86	2323	NA	E
2-Amino-3-Ketobutyric-Acid	7	DB03915	-3.33765	0.68863	3.49605	117.104	6.17757	4318	855	4148	437	1608.39	1778	2483.3	3042	NA	kbl
N-({(2S,3S)-3-[(BENZYLAMINO)CARBONYL]OXIRAN-2-YL}CARBONYL)-L-ISOLEUCYL-L-PROLINE	0	DB07231	-7.27337	0.64378	6.06514	431.489	6.17352	1081	1086	1177	438	882.016	608	1113.81	970	NA	CTSB
3-FLUORO-5-MORPHOLIN-4-YL-N-[1-(2-PYRIDIN-4-YLETHYL)-1H-INDOL-6-YL]BENZAMIDE	0	DB08730	-8.08402	0.12271	6.2451	444.51	6.17334	377	4346	809	439	873.396	600	1098.48	954	NA	MAPK14
Dipicolinic-Acid	1	DB04267	-4.97729	0.4822	3.28691	167.12	6.17159	3595	2227	4275	440	1969.94	2401	3246.77	4009	NA	dapB,dapB
1-Hydroxy-1-Thio-Glycerol	4	DB01684	-3.06497	0.65321	3.10195	124.161	6.17146	4379	1042	4362	441	1721.24	1974	2710.04	3392	NA	PREP
Lactose	0	DB04465	-8.39831	0.42502	3.91885	342.297	6.17034	238	2655	3862	442	1019.11	793	1346.33	1310	A disaccharide of glucose and galactose in human and cow milk. It is used in pharmacy for tablets, in medicine as a nutrient, and in industry.	GLT6D1,GLTP,entB,nedA,Not-Available,TCTS-154,xlnA,lacZ,tetX
1-(1,4-dimethyl-1,2,3,4-tetrahydroquinoxalin-6-yl)methanamine	2	DB08685	-5.37549	0.49624	4.57273	191.278	6.16987	3315	2118	3331	443	1794.1	2094	2859.75	3570	NA	BURPS1710b_3237
4-Hydroxy-3-Methoxybenzoate	1	DB02130	-4.79019	0.6453	3.64758	167.14	6.16868	3718	1081	4033	444	1637.9	1830	2530.78	3119	A flavoring agent. It is the intermediate product in the two-step bioconversion of ferulic acid to vanillin. (J Biotechnol 1996;50(2-3):107-13).	ubiC
Vigabatrin	6	DB01080	-3.67614	0.43844	3.67421	129.159	6.16847	4236	2548	4011	445	2095.04	2602	3511.31	4251	An analogue of gamma-aminobutyric acid, vigabatrin is an irreversible inhibitor of 4-aminobutyrate transaminase, the enzyme responsible for the catabolism of gamma-aminobutyric acid. (From Martindale The Extra Pharmacopoeia, 31st ed). Off-label uses include treatment of cocaine dependence.	GABBR1,ABAT
N-Valeric-Acid	5	DB02406	-3.12624	0.7843	3.53879	102.133	6.16838	4366	384	4113	446	1324.27	1274	1903.38	2167	NA	cumD
3-AMINO-3-BENZYL-[4	4	DB07655	-6.52092	0.64681	6.42721	330.391	6.16792	2137	1074	551	447	867.096	594	1081.4	937	NA	CHEK1
4-{[4-{[(1R,2R)-2-(dimethylamino)cyclopentyl]amino}-5-(trifluoromethyl)pyrimidin-2-yl]amino}-N-methylbenzenesulfonamide	1	DB08341	-6.90831	0.76191	7.30682	458.51	6.16785	1596	469	17	448	274.779	71	233.463	75	NA	PTK2B
N-[3-[[4-[(5-CHLORO-1,3-BENZODIOXOL-4-YL)AMINO]PYRIMIDIN-2-YL]AMINO]PHENYL]METHANESULFONAMIDE	0	DB07254	-7.44691	0.83287	7.09231	433.877	6.16767	894	235	47	449	258.04	62	214.536	67	NA	EPHB4
3-Methylpyridine	1	DB01996	-3.5781	0.86088	3.59798	93.129	6.16729	4263	176	4077	450	1083.17	913	1451.63	1472	NA	MMP13,MMP3
N5-Methylglutamine	0	DB03473	-4.24657	0.27206	3.51248	160.173	6.16697	4024	3677	4134	451	2291.79	2916	3940.1	4469	NA	TM_0488
1-cyclopentyl-3-(1H-pyrrolo[2,3-b]pyridin-5-yl)-1H-pyrazolo[3,4-d]pyrimidin-4-amine	3	DB08052	-7.05437	0.67396	6.80746	319.372	6.16579	1372	930	167	452	557.087	255	597.289	381	NA	SRC
3-FLUORO-N-1H-INDOL-5-YL-5-MORPHOLIN-4-YLBENZAMIDE	0	DB08092	-7.69188	0.41222	5.78838	339.37	6.16471	662	2747	1713	453	1089.92	922	1460.47	1484	3-fluoro-N-1H-indol-5-yl-5-morpholin-4-ylbenzamide is a solid. This compound belongs to the phenylmorpholines. These are aromatic compounds containing a morpholine ring and a benzene ring linked to each other through a CC or a CN bond. This drug targets mitogen-activated protein kinase 14.	MAPK14
Benzylmorphine	1	DB01573	-8.71053	0.47459	5.81265	375.468	6.16466	133	2289	1662	454	692.303	388	796.849	591	NA	NA
Spermidine	9	DB03566	-3.2213	0.41468	3.89989	145.25	6.16455	4342	2731	3875	455	2138.32	2678	3581.74	4314	Spermidine is a polyamine formed from putrescine. It is found in almost all tissues in association with nucleic acids. It is found as a cation at all pH values, and is thought to help stabilize some membranes and nucleic acid structures. It is a precursor of spermine.	potD,TXNRD1,aacC1
2-Amino-8-Methylquinazolin-4(3h)-One	1	DB01825	-5.91914	0.84503	4.76817	175.191	6.16357	2836	208	3160	456	960.186	704	1230.7	1137	NA	tgt
Allyl-{6-[3-(4-Bromo-Phenyl)-1-Methyl-1h-Indazol-6-Yl]Oxy}Hexyl)-N-Methylamine	0	DB03888	-6.74227	0.62543	6.66226	456.428	6.16317	1844	1205	276	457	727.601	428	849.609	663	NA	shc
Etoposide	3	DB00773	-8.0783	0.1931	6.08369	588.562	6.16229	382	4080	1134	458	948.529	692	1209.05	1110	A semisynthetic derivative of podophyllotoxin that exhibits antitumor activity. Etoposide inhibits DNA synthesis by forming a complex with topoisomerase II and DNA. This complex induces breaks in double stranded DNA and prevents repair by topoisomerase II binding. Accumulated breaks in DNA prevent entry into the mitotic phase of cell division, and lead to cell death. Etoposide acts primarily in t…	TOP2A
ginkgolide-C	1	DB06745	-10.6175	0.25047	4.90623	440.401	6.16031	2	3799	3044	459	320.988	92	284.915	108	NA	NA
(5-phenyl-7-(pyridin-3-ylmethylamino)pyrazolo[1,5-a]pyrimidin-3-yl)methanol	0	DB06983	-7.77692	0.11402	5.53941	331.379	6.15925	584	4369	2175	460	1264.02	1182	1770.45	1954	NA	CDK2
PUROMYCIN	1	DB08437	-7.19194	0.11203	5.73073	471.518	6.15905	1185	4376	1833	461	1446.82	1486	2118.29	2500	Puromycin is an antibiotic that prevents bacterial protein translation. It is utilized as a selective agent in laboratory cell cultures. Puromycin is toxic to both prokaryotic and eukaryotic cells, resulting in significant cell death at appropriate doses.	RPL37,RPL3,RPL11,NHP2L1,aat,RPL10L,RPL13A,RPL23,RPL15,RPL19,RPL23A,RSL24D1,RPL26L1,RPL8
Aminosalicylic-Acid	4	DB00233	-4.80123	0.65138	3.61529	153.137	6.15857	3708	1055	4064	462	1646.25	1850	2514.48	3095	An antitubercular agent often administered in association with isoniazid. The sodium salt of the drug is better tolerated than the free acid.	PTGS2,CHUK,ALOX5,PLA2G2E,folK
2-Amino-4-Mercapto-Butyric-Acid	0	DB04422	-3.57273	0.50706	3.42736	135.188	6.15849	4265	2034	4195	463	2026.03	2490	3313.86	4073	A thiol-containing amino acid formed by a demethylation of METHIONINE. [PubChem]	metE,TM_0268,luxS
7-[(3-CHLOROBENZYL)OXY]-4-[(METHYLAMINO)METHYL]-2H-CHROMEN-2-ONE	5	DB07513	-6.57202	0.18058	5.43371	329.783	6.15664	2074	4122	2344	464	1746.22	2011	2716.18	3405	NA	MAOB
1-Aminocyclopropylphosphonate	5	DB03053	-3.52271	0.60322	3.45074	136.067	6.15657	4283	1350	4179	465	1830.85	2161	2891.02	3604	NA	acdS
S,3-Hydroxybutan-2-One	0	DB02788	-3.19441	0.72371	2.96976	88.106	6.15649	4350	661	4413	466	1559.38	1687	2332.43	2831	A product of fermentation. It is a component of the butanediol cycle in microorganisms. In mammals it is oxidized to carbon dioxide.	NA
R,3-Hydroxybutan-2-One	0	DB02788	-3.1787	0.71107	2.96122	88.106	6.15649	4354	726	4416	467	1597.87	1755	2407.79	2937	A product of fermentation. It is a component of the butanediol cycle in microorganisms. In mammals it is oxidized to carbon dioxide.	NA
1-{7-cyclohexyl-6-[4-(4-methylpiperazin-1-yl)benzyl]-7H-pyrrolo[2,3-d]pyrimidin-2-yl}methanamine	0	DB07563	-8.05139	0.1567	6.41269	418.589	6.1557	398	4224	571	468	818.695	538	986.464	831	NA	CTSK
(5Z)-5-(3-BROMOCYCLOHEXA-2,5-DIEN-1-YLIDENE)-N-(PYRIDIN-4-YLMETHYL)-1,5-DIHYDROPYRAZOLO[1,5-A]PYRIMIDIN-7-AMINE	4	DB07595	-6.71339	0.47175	6.28981	381.257	6.15524	1887	2305	749	469	1111.79	957	1482.43	1512	NA	CDK2
Fluorouracil	0	DB00544	-4.19659	0.72961	3.62804	130.078	6.15438	4045	635	4050	470	1487	1562	2182.98	2613	A pyrimidine analog that is an antineoplastic antimetabolite. It interferes with DNA synthesis by blocking the thymidylate synthetase conversion of deoxyuridylic acid to thymidylic acid.	TYMS,Not-Available,Not-Available
5-amino-2-methyl-N-[(1R)-1-naphthalen-1-ylethyl]benzamide	0	DB08656	-8.20885	0.76898	5.96752	304.393	6.15411	308	440	1372	471	543.995	240	570.759	347	NA	rep
dimethyl-(1R,4S)-5,6-bis(4-hydroxyphenyl)-7-oxabicyclo[2	0	DB07932	-6.7208	0.10944	5.58681	394.379	6.15397	1877	4384	2096	472	1689.15	1916	2583.7	3194	NA	ESR1,NCOA2
4-Butyrolactone	0	DB04699	-3.03087	0.67664	2.90123	86.09	6.15358	4388	915	4438	473	1703.86	1947	2611.91	3238	One of the FURANS with a carbonyl thereby forming a cyclic lactone. It is an endogenous compound made from gamma-aminobutyrate and is the precursor of gamma-hydroxybutyrate. It is also used as a pharmacological agent and solvent. [PubChem]	nagJ
Mometasone	0	DB00764	-9.6406	0.63509	6.4858	427.368	6.15278	12	1148	473	474	235.744	52	186.779	51	Mometasone is a medium-potency synthetic corticosteroid with anti-inflammatory, antipruritic, and vasoconstrictive properties. Studies in asthmatic patients have demonstrated that mometasone provides a favorable ratio of topical to systemic activity due to its primary local effect along with the extensive hepatic metabolism and the lack of active metabolites. Though effective for the treatment of…	NR3C1
ginkgolide-J	5	DB06746	-9.4309	0.33683	4.9674	424.402	6.15225	25	3279	2971	475	583.203	279	624.494	402	NA	NA
Calcitriol	1	DB00136	-8.57278	0.63601	6.74161	416.646	6.15216	177	1137	212	476	377.502	121	349.427	153	"Calcitriol is an active metabolite of vitamin D with 3 hydroxyl (OH) groups and is commonly referred to as 1,25-dihydroxycholecalciferol, or 1alpha,25-dihydroxyvitamin D<sub>3</sub>, 1,25-dihydroxyvitamin D<sub>3</sub>. It is produced in the body after series of conversion steps of 7-dehydrocholesterol from exposure to UV light. 7-dehydrocholesterol is converted to [DB00169] (vitamin D3) in the …	VDR
Voglibose	2	DB04878	-5.93486	0.436	3.83221	267.278	6.15101	2824	2563	3922	477	1918.27	2312	3050.52	3801	Voglibose is an alpha-glucosidase inhibitor used for lowering post-prandial blood glucose levels in people with diabetes mellitus. It is made in India by Ranbaxy Labs and sold under the trade name Volix.	MGAM
L-Lysine	0	DB00123	-4.53197	0.5133	4.0651	146.19	6.15041	3881	1985	3758	478	1928.73	2327	3070.58	3828	L-Lysine (abbreviated as Lys or K) is an 伪-amino acid with the chemical formula HO2CCH(NH2)(CH2)4NH2. This amino acid is an essential amino acid, which means that humans cannot synthesize it. Its codons are AAA and AAG. L-Lysine is a base, as are arginine and histidine. The 蔚-amino group acts as a site for hydrogen binding and a general base in catalysis. Common posttranslational modifications in…	SLC7A1,SLC7A4,SLC7A3,SLC7A2,KARS
D-Lysine	2	DB00123	-4.42486	0.40179	4.04923	146.19	6.15041	3942	2812	3773	479	2115.62	2640	3471.15	4224	L-Lysine (abbreviated as Lys or K) is an 伪-amino acid with the chemical formula HO2CCH(NH2)(CH2)4NH2. This amino acid is an essential amino acid, which means that humans cannot synthesize it. Its codons are AAA and AAG. L-Lysine is a base, as are arginine and histidine. The 蔚-amino group acts as a site for hydrogen binding and a general base in catalysis. Common posttranslational modifications in…	SLC7A1,SLC7A4,SLC7A3,SLC7A2,KARS
Hydroxyzine	2	DB00557	-6.40099	0.61684	5.75778	374.912	6.14862	2278	1255	1774	480	1249.1	1153	1718.11	1866	A histamine H1 receptor antagonist that is effective in the treatment of chronic urticaria, dermatitis, and histamine-mediated pruritus. Unlike its major metabolite cetirizine, it does cause drowsiness. It is also effective as an antiemetic, for relief of anxiety and tension, and as a sedative.	HRH1
6-Amino-Hexanoic-Acid	7	DB00513	-3.48599	0.53831	3.65493	131.175	6.14857	4290	1817	4027	481	1971.22	2403	3154.51	3914	An antifibrinolytic agent that acts by inhibiting plasminogen activators which have fibrinolytic properties.	PLG,PLAT,LPA
Aminocaproic-Acid	1	DB00513	-3.8523	0.37425	3.65197	131.175	6.14857	4181	2985	4032	482	2219.21	2809	3691.89	4379	An antifibrinolytic agent that acts by inhibiting plasminogen activators which have fibrinolytic properties.	PLG,PLAT,LPA
6-[4-(2-piperidin-1-ylethoxy)phenyl]-3-pyridin-4-ylpyrazolo[1,5-a]pyrimidine	0	DB08597	-7.89275	0.90528	6.69834	399.498	6.14725	495	83	252	483	265.924	66	217.952	68	NA	ACVR1,FKBP1A
Meso-Erythritol	0	DB04481	-3.6565	0.47101	2.62631	122.12	6.14481	4247	2310	4489	484	2148.68	2697	3531.41	4276	A four-carbon sugar that is found in algae, fungi, and lichens. It is twice as sweet as sucrose and can be used as a coronary vasodilator. [PubChem]	metE
2-Phenyl-Ethanol	4	DB02192	-4.21383	0.5347	3.48849	122.167	6.14267	4035	1843	4157	485	1967.76	2395	3138.46	3900	An antimicrobial, antiseptic, and disinfectant that is used also as an aromatic essence and preservative in pharmaceutics and perfumery.	opd
3h-Pyrazolo[4,3-D]Pyrimidin-7-Ol	1	DB03153	-4.27387	0.52891	3.89846	136.114	6.14248	4012	1879	3878	486	1941.48	2350	3080.58	3839	NA	HPRT1
4-({[4-(3-METHYLBENZOYL)PYRIDIN-2-YL]AMINO}METHYL)BENZENECARBOXIMIDAMIDE	4	DB07809	-7.26925	0.68559	6.32828	344.418	6.14179	1093	872	686	487	751.186	467	867.934	685	NA	F2
2-(4-{(3S,5S)-5-[(3,3-difluoropyrrolidin-1-yl)carbonyl]pyrrolidin-3-yl}piperazin-1-yl)pyrimidine	3	DB08382	-6.64535	0.11588	5.60286	366.416	6.14047	1975	4363	2068	488	1717.24	1966	2611.97	3239	Gosogliptin has been used in trials studying the treatment of Renal Insufficiency, Chronic.	DPP4
6-Hydroxy-L-Norleucine	0	DB03412	-4.65719	0.66014	3.87895	147.174	6.14022	3802	1006	3893	489	1642.67	1839	2460.17	3020	NA	ansB
6-Hydroxy-D-Norleucine	1	DB03412	-4.16129	0.38016	3.42699	147.174	6.14022	4061	2956	4196	490	2228.91	2826	3693.1	4380	NA	ansB
L-Glutamine	0	DB00130	-4.14943	0.66232	4.05153	146.146	6.13969	4066	996	3771	491	1654.78	1863	2481.01	3039	A non-essential amino acid present abundantly throughout the body and is involved in many metabolic processes. It is synthesized from glutamic acid and ammonia. It is the principal carrier of nitrogen in the body and is an important energy source for many cells. An oral formulation of L-glutamine was approved by the FDA in July 2017 for use in sickle cell disease [L892]. This oral formulation is …	CTPS,PPAT,GLUL
D-Glutamine	0	DB00130	-4.35855	0.68779	4.03281	146.146	6.13969	3967	860	3786	492	1587.73	1743	2346.28	2851	A non-essential amino acid present abundantly throughout the body and is involved in many metabolic processes. It is synthesized from glutamic acid and ammonia. It is the principal carrier of nitrogen in the body and is an important energy source for many cells. An oral formulation of L-glutamine was approved by the FDA in July 2017 for use in sickle cell disease [L892]. This oral formulation is …	CTPS,PPAT,GLUL
Cycloleucine	2	DB04620	-4.47451	0.54927	3.61485	129.159	6.13705	3909	1745	4065	493	1922.84	2320	3026.73	3777	Cycloleucine is non-metabolisable amino acid formed by cyclization of leucine. It is also a specific and reversible inhibitor of nucleic acid methylation and widely used in biochemical experiments.	GRIN1
5,6-Diaminouracil	1	DB03826	-4.42173	0.69791	3.57694	142.118	6.13566	3943	798	4092	494	1588.08	1744	2343.81	2849	NA	NA
DIMETHYL-THIOPHOSPHATE	0	DB04687	-2.99609	0.62092	3.00062	142.116	6.13554	4394	1233	4401	495	1853.51	2205	2878.23	3592	NA	opdA
N-(2-chloro-6-methylphenyl)-8-[(3S)-3-methylpiperazin-1-yl]imidazo[1,5-a]quinoxalin-4-amine	0	DB08057	-7.89832	0.55954	6.80109	406.921	6.13326	491	1671	173	496	515.106	218	521.637	297	NA	LCK
D-Phenylalanine	0	DB02556	-5.04423	0.20198	3.62182	165.192	6.13061	3556	4033	4059	497	2319.22	2958	3875.58	4457	An essential aromatic amino acid that is a precursor of melanin; dopamine; noradrenalin (norepinephrine), and thyroxine. [PubChem]	CCBL1,CRH
N-Benzylformamide	4	DB02481	-4.14914	0.52379	3.57721	135.166	6.13005	4067	1907	4091	498	1993.75	2438	3165.81	3930	NA	ADH1B
(3AS,4R,9BR)-4-(4-HYDROXYPHENYL)-6-(METHOXYMETHYL)-1,2,3,3A,4,9B-HEXAHYDROCYCLOPENTA[C]CHROMEN-8-OL	0	DB08020	-7.76727	0.53496	6.08192	326.392	6.12737	592	1839	1137	499	886.525	613	1073.71	926	NA	ESR2,ESR1
6-[4-(2-fluorophenyl)-1,3-oxazol-5-yl]-N-(1-methylethyl)-1,3-benzothiazol-2-amine	0	DB08352	-7.27494	0.26143	6.09958	353.422	6.12561	1076	3746	1096	500	1219.1	1103	1640.83	1774	NA	MAPK14
Dihydrogenphosphate-Ion	6	DB02831	-2.48399	0.42986	2.98563	96.986	6.12535	4456	2610	4406	501	2250.96	2854	3714.3	4395	NA	pstS,DCXR
Dichloroacetic-Acid	2	DB08809	-3.20007	0.66435	3.04731	128.942	6.12404	4349	983	4382	502	1751.18	2020	2655.86	3302	"Dichloroacetic acid, often abbreviated DCA, is an acid analogue of acetic acid in which two of the three hydrogen atoms of the methyl group have been replaced by chlorine atoms. Salts of DCA are used as drugs since they inhibit the enzyme pyruvate dehydrogenase kinase. Early reports of its activity against brain cancer cells led patients to treat themselves with DCA, which is commercially availa…	PDK1
N~6~-cyclohexyl-N~2~-(4-morpholin-4-ylphenyl)-9H-purine-2,6-diamine	4	DB07340	-7.16537	0.15668	6.25587	393.495	6.12369	1220	4226	800	503	1200.15	1074	1603.71	1708	NA	AURKB,INCENP
2-({8-[(3R)-3-AMINOPIPERIDIN-1-YL]-1,3-DIMETHYL-2,6-DIOXO-1,2,3,6-TETRAHYDRO-7H-PURIN-7-YL}METHYL)BENZONITRILE	1	DB08743	-7.06724	0.12943	5.80745	393.451	6.12165	1347	4320	1677	504	1489.2	1569	2136.95	2544	NA	DPP4
(5S,8R,9S,10S,13R,14S,17S)-13-{2-[(3,5-DIFLUOROBENZYL)OXY]ETHYL}-17-HYDROXY-10-METHYLHEXADECAHYDRO-3H-CYCLOPENTA[A]PHENANTHREN-3-ONE	0	DB07717	-8.69684	0.2532	6.54542	446.578	6.12158	138	3786	397	505	568.899	266	591.948	377	NA	AR
(3R)-4-[(3R)-3-AMINO-4-(2,4,5-TRIFLUOROPHENYL)BUTANOYL]-3-METHYL-1,4-DIAZEPAN-2-ONE	1	DB07154	-7.70038	0.41691	6.20971	343.349	6.12103	653	2719	864	506	938.635	676	1153.31	1021	NA	DPP4
N-[(4-HYDROXY-8-IODOISOQUINOLIN-3-YL)CARBONYL]GLYCINE	4	DB07112	-6.27337	0.29493	5.05881	372.118	6.1205	2444	3535	2864	507	1881.99	2246	2913.99	3629	NA	EGLN1
L-Methionine	0	DB00134	-3.75953	0.48095	3.44834	149.215	6.12021	4209	2239	4180	508	2115.04	2635	3402.54	4160	A sulfur containing essential amino acid that is important in many body functions. It is a chelating agent for heavy metals.	MTRR,MTR,METAP2,BHMT,BHMT2
(2S)-1-(6H-INDOL-3-YL)-3-{[5-(7H-PYRAZOLO[3,4-C]PYRIDIN-5-YL)PYRIDIN-3-YL]OXY}PROPAN-2-AMINE	2	DB07124	-7.40263	0.65574	6.72557	384.443	6.12009	938	1026	223	509	574.901	273	598.713	384	NA	PRKACA
N-METHYL-{4-[2-(7-OXO-6,7-DIHYDRO-8H-[1,3]THIAZOLO[5,4-E]INDOL-8-YLIDENE)HYDRAZINO]PHENYL}METHANESULFONAMIDE	0	DB08123	-7.38451	0.48722	6.37736	401.473	6.1195	955	2191	621	510	902.25	632	1091.22	943	NA	CDK2
S-Hydroxycysteine	8	DB01915	-3.01987	0.55409	3.21027	137.16	6.1187	4390	1710	4320	511	2017.63	2477	3188.95	3950	S-hydroxycysteine is a solid. This compound belongs to the alpha amino acids and derivatives. These are amino acids in which the amino group is attached to the carbon atom immediately adjacent to the carboxylate group (alpha carbon), or a derivative thereof. It targets the proteins subtilisin BPN', glutathione S-transferase A1, glutathione S-transferase p, myelin P2 protein, and complement c3.	C3,azu,GSTP1,ACAT2,GSTA1,PMP2,phbA,apr
3-(3,5-Dibromo-4-Hydroxy-Benzoyl)-2-Ethyl-Benzofuran-6-Sulfonic-Acid-[4-(Thiazol-2-Ylsulfamoyl)-Phenyl]-Amide	0	DB03311	-8.27005	0.48218	7.33877	741.461	6.11766	281	2228	14	512	258.824	64	206.182	60	NA	PTPN1
Bacampicillin	0	DB01602	-7.27891	0.70082	6.24833	465.528	6.11578	1074	776	807	513	766.415	481	876.153	695	Bacampicillin is a prodrug of ampicillin and is microbiologically inactive. It is absorbed following oral administration. During absorption from the gastrointestinal tract, bacampicillin is hydrolyzed by esterases present in the intestinal wall. It is microbiologically active as ampicillin, and exerts a bactericidal action through the inhibition of the biosynthesis of cell wall mucopeptides. It i…	pbpA
4-{[4-(4-fluoro-3-methylphenyl)-1,3-thiazol-2-yl]amino}-2-hydroxybenzoic-acid	2	DB07616	-7.35687	0.55168	6.24044	344.367	6.11571	981	1723	820	514	918.719	648	1114.95	974	NA	HPGDS
Malonate-Ion	5	DB02201	-2.98609	0.64918	2.83191	102.045	6.11533	4398	1063	4457	515	1809.92	2122	2751.76	3442	NA	aroG,SDF2
Methyl-aminolevulinate	3	DB00992	-3.66838	0.76356	4.05336	145.158	6.1153	4242	462	3769	516	1397.24	1391	1947.51	2247	Methyl aminolevulinate is a prodrug that is metabolised to Protoporphyrin IX (a photosensitizer) used in photodynamic therapy.	FCGR1A
N-{2,2-DIFLUORO-2-[(2R)-PIPERIDIN-2-YL]ETHYL}-2-[2-(1H-1,2,4-TRIAZOL-1-YL)BENZYL][1,3]OXAZOLO[4,5-C]PYRIDIN-4-AMINE	2	DB04591	-7.39871	0.07587	6.52989	439.47	6.11505	942	4456	412	517	972.402	735	1200.32	1086	NA	F2
1-[4-(PYRIDIN-4-YLOXY)PHENYL]-3-[3-(TRIFLUOROMETHYL)PHENYL]UREA	0	DB08043	-7.08159	0.26933	5.47639	373.334	6.11429	1325	3697	2272	518	1549.53	1671	2232.67	2690	NA	ABL1
N-Acetyl-Serine	1	DB02340	-4.03062	0.82955	3.89537	147.13	6.11279	4119	243	3885	519	1191.9	1062	1572.52	1667	NA	F13A1
(4R,5R)-5-AMINO-1-[2-(1,3-BENZODIOXOL-5-YL)ETHYL]-4-(2,4,5-TRIFLUOROPHENYL)PIPERIDIN-2-ONE	0	DB07830	-8.11473	0.82356	6.80305	392.377	6.11111	357	258	170	520	300.39	80	250.176	84	NA	DPP4
2,3-Didehydroalanine	8	DB02688	-2.63262	0.56926	2.90595	87.078	6.1101	4438	1604	4435	521	2013.87	2474	3160.54	3918	NA	mrsA
Nandrolone-decanoate	4	DB08804	-7.21033	0.50912	6.88008	428.657	6.10915	1164	2014	126	522	626.633	323	665.98	457	C18 steroid with androgenic and anabolic properties. It is generally prepared from alkyl ethers of estradiol to resemble testosterone but less one carbon at the 19 position. It is a schedule III drug in the U.S.	AR
4-Hydroxy-1,2,5-Oxadiazole-3-Carboxylic-Acid	0	DB02401	-4.33587	0.43123	3.37596	130.059	6.1061	3979	2601	4231	523	2187.58	2762	3524.68	4266	NA	Not-Available,LDHB
1-{(2S,5S)-4-FLUORO-5-[(TRITYLOXY)METHYL]TETRAHYDROFURAN-2-YL}PYRIMIDINE-2,4(1H,3H)-DIONE	0	DB04685	-8.06224	0.16332	6.06917	472.516	6.10527	392	4196	1167	524	1001.45	771	1242.79	1157	NA	PF11_0282,DUT
Eplerenone	0	DB00700	-8.93622	0.21014	5.89256	414.498	6.10478	76	3992	1517	525	701.112	397	772.082	564	Eplerenone, an aldosterone receptor antagonist similar to spironolactone, has been shown to produce sustained increases in plasma renin and serum aldosterone, consistent with inhibition of the negative regulatory feedback of aldosterone on renin secretion. The resulting increased plasma renin activity and aldosterone circulating levels do not overcome the effects of eplerenone. Eplerenone selecti…	NR3C2
N-(6-{[3-(4-Bromophenyl)-1,2-Benzisothiazol-6-Yl]Oxy}Hexyl)-N-Methylprop-2-En-1-Amine	2	DB02544	-6.00966	0.54495	6.85173	459.453	6.10476	2737	1780	141	526	775.309	489	882.344	702	NA	shc
Glutamyl-Group	0	DB03774	-3.77006	0.62363	3.63744	132.139	6.10444	4206	1219	4044	527	1818.12	2141	2747.23	3435	NA	NA
N-ethyl-4-{[5-(methoxycarbamoyl)-2-methylphenyl]amino}-5-methylpyrrolo[2,1-f][1,2,4]triazine-6-carboxamide	0	DB06940	-8.14291	0.94323	6.99876	382.424	6.10436	340	26	70	528	134.445	16	85.2151	14	N-ethyl-4-{[5-(methoxycarbamoyl)-2-methylphenyl]amino}-5-methylpyrrolo[2,1-f][1,2,4]triazine-6-carboxamide is a solid. This compound belongs to the pyrrolotriazines. These are compounds containing a pyrrolotriazine moiety, which consists of a pyrrole ring fused to a triazine ring. N-ethyl-4-{[5-(methoxycarbamoyl)-2-methylphenyl]amino}-5-methylpyrrolo[2,1-f][1,2,4]triazine-6-carboxamide is known t…	MAPK14
(3S)-1-(1,3-BENZODIOXOL-5-YLMETHYL)-3-[4-(1H-IMIDAZOL-1-YL)PHENOXY]PIPERIDINE	6	DB07011	-6.98041	0.16585	5.86042	377.444	6.10403	1494	4185	1573	529	1510.28	1601	2142.52	2556	NA	NOS2
4,5-Dimethyl-1,2-Phenylenediamine	0	DB03180	-4.94221	0.54598	4.21502	136.198	6.10389	3618	1770	3660	530	1877.37	2238	2861.81	3573	NA	cobT
(6S)-1-chloro-3-[(4-fluorobenzyl)oxy]-6-(pyrrolidin-1-ylcarbonyl)pyrrolo[1,2-a]pyrazin-4(6H)-one	6	DB07148	-6.76269	0.48019	6.09874	389.814	6.10249	1813	2248	1097	531	1241.29	1137	1647.4	1782	NA	PREP
Propanoic-Acid	1	DB03766	-2.9075	0.67453	2.81958	74.079	6.10224	4406	923	4460	532	1762.48	2044	2627.4	3256	Sodium propionate is the sodium salt of propionic acid that exists as colorless, transparent crystals or a granular crystalline powder. It is considered generally recognized as safe (GRAS) food ingredient by FDA, where it acts as an antimicrobial agent for food preservation and flavoring agent. Its use as a food additive is also approved in Europe. Sodium propionate is is prepared by neutralizing…	cpo,GPHN,PA3967,cumD,alr
2-Ammoniobut-3-Enoate,-2-Amino-3-Butenoate	1	DB01804	-3.1718	0.62623	3.51957	101.105	6.10098	4357	1201	4123	533	1841.48	2184	2783.86	3485	NA	acdS
Hexane-1,6-Diol	3	DB02210	-3.61647	0.50074	3.38778	118.176	6.10001	4256	2084	4224	534	2114.91	2634	3346.12	4103	NA	NE0143,HRAS,NR3C1,E,ruvB,PLA2G1B
(3AS,4R,9BR)-2,2-DIFLUORO-4-(4-HYDROXYPHENYL)-1,2,3,3A,4,9B-HEXAHYDROCYCLOPENTA[C]CHROMEN-8-OL	0	DB07638	-8.75571	0.40572	5.88619	318.319	6.09958	115	2786	1527	535	715.267	417	787.963	584	NA	ESR1,ESR2
octyl-3-deoxy-2-O-(6-deoxy-alpha-L-galactopyranosyl)-beta-D-xylo-hexopyranoside	0	DB07633	-6.69417	0.28128	5.30068	422.515	6.0993	1913	3616	2542	536	1752.15	2022	2600.4	3215	NA	ABO
N-((1R,2R)-2-(5-CHLORO-1H-INDOLE-2-CARBOXAMIDO)CYCLOHEXYL)-5-METHYL-4,5,6,7-TETRAHYDROTHIAZOLO[5,4-C]PYRIDINE-2-CARBOXAMIDE	3	DB07630	-7.81862	0.15331	6.56316	472.014	6.09794	547	4241	382	537	830.564	551	960.52	796	NA	F10
Acetic-acid	0	DB14511	-2.33561	0.74313	2.73365	59.044	6.09646	4470	562	4480	538	1568.65	1701	2240.99	2700	NA	NA
Dextrothyroxine	8	DB00509	-5.75597	0.02965	5.90261	776.872	6.09616	2993	4495	1498	539	1815.45	2133	2721.34	3411	The major hormone derived from the thyroid gland. Thyroxine is synthesized via the iodination of tyrosines (monoiodotyrosine) and the coupling of iodotyrosines (diiodotyrosine) in the thyroglobulin. Thyroxine is released from thyroglobulin by proteolysis and secreted into the blood. Thyroxine is peripherally deiodinated to form triiodothyronine which exerts a broad spectrum of stimulatory effects…	THRA,THRB,TPO
Oxonic-Acid	0	DB03209	-4.75784	0.5193	3.53069	157.085	6.09494	3739	1940	4116	540	2003.81	2454	3102.26	3864	"Oteracil is an adjunct to antineoplastic therapy, used to reduce the toxic side effects associated with chemotherapy. Approved by the European Medicines Agency (EMA) in March 2011, Oteracil is available in combination with [DB09257] and [DB09256] within the commercially available product ""Teysuno"". The main active ingredient in Teysuno is [DB09256], a pro-drug of [DB00544] (5-FU), which is a c…	NA
N-((1R,2S)-2-(5-CHLORO-1H-INDOLE-2-CARBOXAMIDO)CYCLOHEXYL)-5-METHYL-4,5,6,7-TETRAHYDROTHIAZOLO[5,4-C]PYRIDINE-2-CARBOXAMIDE	2	DB07629	-8.08837	0.13767	6.50176	472.014	6.09423	372	4298	452	541	790.745	506	897.393	721	NA	F10
Sitagliptin	1	DB01261	-7.65352	0.60011	6.63107	407.318	6.09365	700	1378	306	542	632.437	331	665.819	456	Sitagliptin is an oral dipeptidyl peptidase-4 (DPP-4) inhibitor used in conjunction with diet and exercise to improve glycemic control in patients with type 2 diabetes mellitus[Label,A2260,A2255,A2256]. The effect of this medication leads to glucose dependent increases in insulin and decreases in glucagon to improve control of blood sugar[Label,A2255]. Sitagliptin was granted FDA approval on Octo…	DPP4
D-Treitol	9	DB03278	-3.28232	0.80337	3.21267	122.12	6.09338	4333	316	4318	543	1338.57	1294	1808.23	2023	A four-carbon sugar that is found in algae, fungi, and lichens. It is twice as sweet as sucrose and can be used as a coronary vasodilator. [PubChem]	pflB
(3Z)-1-[(6-fluoro-4H-1,3-benzodioxin-8-yl)methyl]-4-[(E)-2-phenylethenyl]-1H-indole-2,3-dione-3-oxime	2	DB08010	-8.62699	0.38884	6.4452	430.435	6.09322	160	2898	526	544	603.533	293	624.791	404	NA	MAPK10
(9BETA,11ALPHA,13ALPHA,14BETA,17ALPHA)-11-(METHOXYMETHYL)ESTRA-1(10),2,4-TRIENE-3,17-DIOL	7	DB07707	-7.63961	0.58873	6.30132	316.441	6.09241	716	1460	727	545	802.231	522	912.571	748	NA	ESR1,NCOA2
(1S,5S,7R)-N~7~-(BIPHENYL-4-YLMETHYL)-N~3~-HYDROXY-6,8-DIOXA-3-AZABICYCLO[3	8	DB07026	-6.91964	0.41317	5.45432	383.404	6.09239	1579	2741	2307	546	1528.03	1634	2153.34	2572	NA	MMP12
5-Chloro-thiophene-2-carboxylic-acid-((3S,4S)-1-{[2-fluoro-4-(2-oxo-2H-pyridin-1-yl)-phenylcarbamoyl]-methyl}-4-hydroxy-pyrrolidin-3-yl)-amide	0	DB07875	-7.85701	0.18543	5.73466	490.944	6.09088	516	4108	1826	547	1206.26	1083	1570.1	1664	NA	F10
2-[(5,6-DIPHENYLFURO[2,3-D]PYRIMIDIN-4-YL)AMINO]ETHANOL	0	DB08393	-7.26018	0.2278	5.63041	331.375	6.08785	1102	3915	2024	548	1479.03	1548	2059.24	2396	NA	CHEK1
5-CHLORO-N-{(3S)-1-[(1S)-1-METHYL-2-MORPHOLIN-4-YL-2-5-CHLORO-N-{(3S)-1-[(1S)-1-METHYL-2-MORPHOLIN-4-YL-2-SULFONAMIDE	0	DB07848	-8.14019	0.65262	6.75276	454.936	6.08776	345	1047	201	549	446.821	167	417.177	207	NA	F10
Methysergide	3	DB00247	-7.03388	0.40575	6.20839	353.466	6.08634	1408	2785	868	550	1169.71	1036	1504.24	1550	An ergot derivative that is a congener of lysergic acid diethylamide. It antagonizes the effects of serotonin in blood vessels and gastrointestinal smooth muscle, but has few of the properties of other ergot alkaloids. Methysergide is used prophylactically in migraine and other vascular headaches and to antagonize serotonin in the carcinoid syndrome.	HTR2B,HTR2C,HTR2A,HTR1A,HTR7
Oxacillin	3	DB00713	-7.21867	0.40359	6.00752	401.444	6.08623	1153	2804	1286	551	1230.27	1123	1607.99	1719	An antibiotic similar to flucloxacillin used in resistant staphylococci infections.	pbp3,pbp2a,pbpA,penA,pbp1b,pbpA
2,5-Xylidine	0	DB02163	-4.71869	0.58092	3.7106	121.183	6.08469	3763	1516	3984	552	1882.01	2247	2832.59	3542	NA	cobT
3-Methylphenylalanine	0	DB02685	-5.63715	0.32833	3.89739	179.219	6.0842	3097	3329	3882	553	2169	2728	3420.61	4177	NA	CTSB
(3R)-METHYLCARBAMOYL-7-SULFOAMINO-3,4-DIHYDRO-1H-ISOQUINOLINE-2-CARBOXYLIC-ACID-BENZYL-ESTER	1	DB08549	-7.07304	0.32088	5.8758	419.459	6.08361	1338	3373	1551	554	1403.29	1409	1912.91	2184	NA	PTPN1
1-(5-TERT-BUTYL-1,3,4-OXADIAZOL-2-YL)-2-(METHYLAMINO)ETHANONE	1	DB08576	-5.35811	0.86266	4.91137	197.238	6.08216	3327	174	3039	555	994.046	766	1207.2	1105	NA	pip
1-Benzyl-(R)-Propylamine	4	DB02972	-4.6108	0.58815	4.15609	149.237	6.08154	3827	1467	3702	556	1843.74	2188	2749.42	3438	NA	gag-pol
2-Aminobenzoic-Acid	6	DB04166	-4.4672	0.55452	3.70766	137.138	6.08132	3913	1709	3985	557	1962.84	2384	2986.94	3725	NA	IL4I1,DAO
6-Aminobenzoic-Acid	1	DB04166	-4.67169	0.48748	3.56453	137.138	6.08132	3791	2189	4098	558	2087.14	2588	3239.84	4002	NA	IL4I1,DAO
Phenylalanine-Amide	2	DB04029	-4.89639	0.52523	3.9729	164.208	6.08053	3645	1897	3832	559	1961.78	2381	2981.24	3720	NA	Not-Available,Not-Available,daaA
4-Methyl-Histidine	6	DB04151	-4.22964	0.5741	4.14	169.184	6.07808	4030	1567	3712	560	1903.45	2283	2861.94	3575	NA	ACTA1
2-[2-(2-FLUOROPHENYL)PYRIDIN-4-YL]-1,5,6,7-TETRAHYDRO-4H-PYRROLO[3,2-C]PYRIDIN-4-ONE	1	DB07728	-7.68637	0.60058	6.12513	307.328	6.07739	667	1371	1033	561	853.211	576	981.193	825	NA	MAPKAPK2,MAPKAPK3
4-[5-(4-FLUORO-PHENYL)-2-(4-METHANESULFINYL-PHENYL)-3H-IMIDAZOL-4-YL]-PYRIDINE	6	DB08521	-6.54965	0.3135	6.14972	377.444	6.07738	2101	3423	986	562	1412.9	1426	1921.19	2193	NA	MAPK14,MAPK1
(2R)-1-[4-({4-[(2,5-DICHLOROPHENYL)AMINO]PYRIMIDIN-2-YL}AMINO)PHENOXY]-3-(DIMETHYLAMINO)PROPAN-2-OL	2	DB07750	-6.76088	0.55452	6.7459	448.354	6.07666	1818	1708	208	563	776.539	490	864.401	680	NA	CDK2
Butylphosphonate	3	DB03999	-3.48622	0.72861	3.56412	138.103	6.07641	4289	639	4100	564	1586.65	1738	2239.82	2697	NA	lip
ginkgolide-B	0	DB06744	-10.2655	0.28995	4.96787	424.402	6.07592	5	3564	2970	565	415.842	145	375.452	172	NA	NA
7-Deazaguanine	1	DB02245	-4.87631	0.80698	4.37687	150.141	6.07557	3659	307	3514	566	1222.59	1108	1580.4	1680	NA	NA
1-TERT-BUTYL-3-(2,5-DIMETHYLBENZYL)-1H-PYRAZOLO[3,4-D]PYRIMIDIN-4-AMINE	2	DB08035	-7.12101	0.92805	6.90914	309.417	6.07303	1268	49	117	567	253.379	60	193.717	55	NA	AR
N-{5-[4-(4-METHYLPIPERAZIN-1-YL)PHENYL]-1H-PYRROLO[2,3-B]PYRIDIN-3-YL}NICOTINAMIDE	1	DB06876	-7.53935	0.86274	6.91804	412.497	6.07234	799	171	112	568	305.336	81	248.268	83	NA	CHEK1
N-(5-{[(2S)-4-amino-2-(3-chlorophenyl)butanoyl]amino}-1H-indazol-3-yl)benzamide	7	DB07608	-7.03604	0.61075	6.73032	447.926	6.07222	1402	1298	217	569	688.492	384	733.659	525	NA	DYRK1A,CRB2
5-METHYL-3-(9-OXO-1,8-DIAZA-TRICYCLO[10	0	DB08493	-8.18969	0.09009	6.10311	441.572	6.07213	314	4424	1085	570	962.747	710	1146.55	1012	NA	MMP7
Doxazosin	0	DB00590	-7.59924	0.30283	5.82253	451.483	6.07081	752	3487	1641	571	1252	1161	1626.52	1752	Doxazosin is a quinazoline-derivative that selectively antagonizes postsynaptic &alpha;<sub>1</sub>-adrenergic receptors. It may be used to mild to moderate hypertension and in the management of symptomatic benign prostatic hyperplasia (BPH). &alpha;<sub>1</sub>-Receptors mediate contraction and hypertrophic growth of smooth muscle cells. Antagonism of these receptors leads to smooth muscle relax…	ADRA1A,ADRA1B,ADRA1D,KCNH2,KCNH6,KCNH7
(5S)-5-(2-amino-2-oxoethyl)-4-oxo-N-[(3-oxo-3,4-dihydro-2H-1,4-benzoxazin-6-yl)methyl]-3,4,5,6,7,8-hexahydro[1]benzothieno[2,3-d]pyrimidine-2-carboxamide	0	DB07397	-8.96476	0.81593	6.79661	467.507	6.07031	72	276	176	572	211.489	41	151.793	39	NA	MMP8
5-(2,3-dichlorophenyl)-N-(pyridin-4-ylmethyl)pyrazolo[1,5-a]pyrimidin-7-amine	7	DB08531	-6.53805	0.36655	6.51033	370.243	6.06884	2116	3058	442	573	1131.44	978	1419.47	1427	NA	CDK2
Sunitinib	0	DB01268	-6.95955	0.40177	6.29724	398.482	6.06874	1523	2813	733	574	1158.7	1016	1464.39	1493	Sunitinib is a small-molecule multi-targeted receptor tyrosine kinase (RTK) inhibitor. On January 26, 2006, the agent was formally approved by the US FDA for the indications of treating renal cell carcinoma (RCC) and imatinib-resistant gastrointestinal stromal tumor (GIST). For these purposes, sunitinib is generally available as an orally administered formulation. Sunitinib inhibits cellular sign…	PDGFRB,FLT1,KIT,KDR,FLT4,FLT3,CSF1R,PDGFRA
Bezitramide	1	DB01459	-7.56437	0.42601	6.95682	492.623	6.0686	776	2640	91	575	572.195	268	571.262	348	"Bezitramide is a narcotic analgesic which was discovered in 1961, clinically tested around the 1970's [A14383], and marketed under the name Burgodin. After cases of fatal overdose in the Netherlands in 2004 the drug was withdrawn from the market.	NA
4-Methyl-Valeric-Acid	1	DB03993	-3.84943	0.38825	3.49258	116.16	6.06761	4183	2901	4152	576	2321.02	2964	3693.44	4381	NA	ilvE
(20S)-19,20,21,22-TETRAHYDRO-19-OXO-5H-18,20-ETHANO-12,14-ETHENO-6,10-METHENO-18H-BENZ[D]IMIDAZO[4,3-K][1,6,9,12]OXATRIAZA-CYCLOOCTADECOSINE-9-CARBONITRILE	6	DB08674	-7.84582	0.15832	6.15731	435.487	6.06711	522	4216	970	577	1053.49	857	1287.6	1229	NA	FNTA,FNTB
N-(2-chlorophenyl)-5-phenylimidazo[1,5-a]pyrazin-8-amine	0	DB08055	-7.66056	0.76057	6.69094	320.783	6.06587	692	473	256	578	469.12	185	437.592	224	NA	LCK
Glycochenodeoxycholic-Acid	0	DB02123	-9.41066	0.93134	7.33474	449.632	6.06542	26	44	15	579	56.1434	4	25.7932	3	A bile salt formed in the liver from chenodeoxycholate and glycine, usually as the sodium salt. It acts as a detergent to solubilize fats for absorption and is itself absorbed. It is a cholagogue and choleretic. [PubChem]	hdhA
(2e,3s)-3-Hydroxy-5'-[(4-Hydroxypiperidin-1-Yl)Sulfonyl]-3-Methyl-1,3-Dihydro-2,3'-Biindol-2'(1'h)-One	0	DB03583	-8.6878	0.46733	6.57083	441.509	6.06531	141	2340	370	580	515.841	220	496.073	279	NA	CDK2
Propyl-Acetate	1	DB01670	-3.08512	0.7315	3.4752	102.133	6.06456	4377	624	4169	581	1603.77	1767	2249.73	2718	NA	est
Aminomethylcyclohexane	0	DB02435	-4.09478	0.47565	3.40966	114.212	6.06397	4087	2282	4203	582	2185.5	2756	3396.98	4154	NA	murA,PRSS1
Hetacillin	2	DB00739	-7.75634	0.31145	6.12844	389.477	6.06366	600	3439	1028	583	1054.54	859	1284.87	1221	Hetacillin is a penicillin beta-lactam antibiotic used in the treatment of bacterial infections caused by susceptible, usually gram-positive, organisms. The name "penicillin" can either refer to several variants of penicillin available, or to the group of antibiotics derived from the penicillins. Hetacillin has in vitro activity against gram-positive and gram-negative aerobic and anaerobic bacter…	pbp2a,pbp1b,pbp3,pbpA,penA
4-Oxoretinol	2	DB02699	-7.20399	0.77713	6.41294	300.442	6.06291	1167	411	570	584	632.121	330	649.027	431	NA	NA
Lumefantrine	3	DB06708	-6.93045	0.24198	6.96299	528.951	6.06267	1567	3844	86	585	741.953	454	803.126	599	Lumefantrine is an antimalarial agent used to treat acute uncomplicated malaria. It is administered in combination with artemether for improved efficacy. This combination therapy exerts its effects against the erythrocytic stages of <i>Plasmodium spp.</i> and may be used to treat infections caused by <i>P. falciparum</i> and unidentified <i>Plasmodium</i> species, including infections acquired in…	NA
3-({4-[(5-CHLORO-1,3-BENZODIOXOL-4-YL)AMINO]PYRIMIDIN-2-YL}AMINO)BENZAMIDE	1	DB07256	-7.39828	0.64502	6.78143	383.795	6.06262	943	1083	187	586	578.389	276	575.874	354	NA	EPHB4
1,3,4,9-Tetrahydro-2-(Hydroxybenzoyl)-9-[(4-Hydroxyphenyl)Methyl]-6-Methoxy-2h-Pyrido[3,4-B]Indole	0	DB04030	-8.8903	0.27542	6.18272	398.462	6.06239	87	3651	926	587	644.607	347	665.039	454	NA	fabI
Hexachlorophene	0	DB00756	-7.62748	0.71879	6.81627	406.907	6.06166	727	688	160	588	465.752	179	430.937	219	A chlorinated bisphenol antiseptic with a bacteriostatic action against Gram-positive organisms, but much less effective against Gram-negative organisms. It is mainly used in soaps and creams and is an ingredient of various preparations used for skin disorders. (From Martindale, The Extra Pharmacopoeia, 30th ed, p797)	dld,SDHD,GLUD1
8-(2-Chloro-3,4,5-Trimethoxy-Benzyl)-2-Fluoro-9-Pent-4-Ylnyl-9h-Purin-6-Ylamine	0	DB02550	-6.95266	0.13134	6.56065	433.871	6.05995	1537	4315	384	589	1106.69	946	1365.62	1331	NA	HSP90AA1
Moexipril	8	DB00691	-6.21591	0.09382	5.77585	498.576	6.05941	2510	4412	1742	590	1836.76	2171	2681.96	3345	Moexipril is a non-sulfhydryl containing precursor of the active angiotensin-converting enzyme (ACE) inhibitor moexiprilat. It is used to treat high blood pressure (hypertension). It works by relaxing blood vessels, causing them to widen. Lowering high blood pressure helps prevent strokes, heart attacks and kidney problems.	ACE,ACE2
Eszopiclone	1	DB00402	-7.17404	0.58053	6.4044	388.815	6.05777	1210	1517	581	591	891.012	619	1021.68	880	"Eszopiclone, marketed by Sepracor under the brand-name Lunesta, is a nonbenzodiazepine hypnotic drug used to treat insomnia. It is the active stereoisomer of zopiclone, belonging to the class of drugs known as _cyclopyrrolones_.[A179638,L6850] Cyclopyrrolone drugs demonstrate high efficacy and low toxicity[A179827], offering a safer alternative to other drugs used for insomnia.	GABRA1,GABRA2,GABRA3,GABRA5,TSPO
Sulfanilamide	0	DB00259	-5.34186	0.78193	4.0183	172.209	6.05775	3340	394	3795	592	1311.28	1261	1709.3	1858	Sulfanilamide is a molecule containing the sulfonamide functional group attached to an aniline.	folP
N-Methylleucine	3	DB04487	-3.81293	0.66191	4.05966	145.202	6.05735	4191	1001	3764	593	1749.3	2016	2508.81	3084	NA	CXCL10
Uracil	2	DB03419	-3.79793	0.73033	3.33369	112.088	6.05647	4197	630	4244	594	1606.79	1772	2238.82	2695	NA	rsuA,UL2,ung,DPYD,UCKL1,udg,pdp
2-({[2,3,5,6-TETRAFLUORO-3'-(TRIFLUOROMETHOXY)BIPHENYL-4-YL]AMINO}CARBONYL)CYCLOPENTA-1,3-DIENE-1-CARBOXYLIC-ACID	0	DB07978	-8.59904	0.35542	6.73017	461.289	6.05583	172	3144	218	595	514.631	217	490.331	274	NA	DHODH
(2R)-2-(5-CHLORO-2-THIENYL)-N-{(3S)-1-[(1S)-1-METHYL-2-MORPHOLIN-4-YL-2-OXOETHYL]-2-OXOPYRROLIDIN-3-YL}PROPENE-1-SULFONAMIDE	0	DB07211	-7.0341	0.31674	6.38601	461.993	6.05341	1405	3394	608	596	1146.53	1002	1425.93	1434	NA	F2,F10
4-(6-CYCLOHEXYLMETHOXY-9H-PURIN-2-YLAMINO)--BENZAMIDE	2	DB08241	-7.1719	0.76133	7.10016	366.425	6.05278	1211	470	43	597	347.673	107	290.338	110	NA	CCNA2,CDK2
Glyoxalate,-Glyoxylate	3	DB04343	-2.36491	0.69208	2.58579	74.035	6.05141	4467	829	4491	598	1775.84	2059	2552.53	3157	NA	glcB,icl,glcB,Rv3853
(CHLOROACETYL)CARBAMIC-ACID-(3R,4S,5S,5R)-5-METHOXY-4-[(2R,3R)-2-METHYL-3-(3-METHYL-2-BUTENYL)OXIRANYL]-1-OXASPIRO[2	0	DB08633	-7.14969	0.73829	6.46835	401.887	6.051	1238	589	493	599	681.204	378	711.04	502	O-(chloroacetylcarbamoyl)fumagillol (TNP-470) has been used in trials studying the treatment of HIV Infections, Sarcoma, Kaposi, and Pancreatic Neoplasms.	METAP2
(2R,3R)-7-(methylsulfonyl)-3-(2,4,5-trifluorophenyl)-1,2,3,4-tetrahydropyrido[1,2-a]benzimidazol-2-amine	2	DB07193	-7.79328	0.48387	6.63329	395.406	6.04824	566	2216	303	600	691.027	386	724.341	518	NA	DPP4
Bosentan	2	DB00559	-7.33529	0.21891	6.85037	551.625	6.04797	1002	3959	142	601	762.788	478	825.874	630	Bosentan is a dual endothelin receptor antagonist marketed under the trade name Tracleer by Actelion Pharmaceuticals. Bosentan is used to treat pulmonary hypertension by blocking the action of endothelin molecules that would otherwise promote narrowing of the blood vessels and lead to high blood pressure.	EDNRA,EDNRB
4-[1-(2,6-dichlorobenzyl)-2-methyl-1H-imidazol-4-yl]pyrimidin-2-amine	0	DB08076	-7.04912	0.49385	6.32625	334.21	6.04787	1384	2139	690	602	1053.05	854	1268.82	1198	NA	accC
Quinolinic-Acid	0	DB01796	-4.5892	0.36151	3.30454	167.12	6.04706	3843	3102	4264	603	2352.94	3020	3704.33	4392	A metabolite of tryptophan with a possible role in neurodegenerative disorders. Elevated CSF levels of quinolinic acid are correlated with the severity of neuropsychological deficits in patients who have AIDS. [PubChem]	nadC,nadC
2-(methylamino)-N-(4-methyl-1,3-thiazol-2-yl)-5-[(4-methyl-4H-1,2,4-triazol-3-yl)sulfanyl]benzamide	2	DB08118	-6.0431	0.17646	5.88012	360.468	6.04625	2701	4138	1541	604	1795.93	2098	2582.49	3190	NA	GCK
4-[(5-{[4-(3-CHLOROPHENYL)-3-OXOPIPERAZIN-1-YL]METHYL}-1H-IMIDAZOL-1-YL)METHYL]BENZONITRILE	0	DB07227	-7.77472	0.34136	6.3794	405.889	6.04569	587	3244	619	605	918.949	650	1056.34	912	NA	FNTA,FNTB,PGGT1B
6-Chloro-2-(2-Hydroxy-Biphenyl-3-Yl)-1h-Indole-5-Carboxamidine	4	DB03865	-7.50549	0.45066	5.99426	362.84	6.0446	830	2458	1317	606	1129.61	977	1390.21	1379	NA	F2,PRSS1,PLAU,HPN
N(4)-adenosyl-N(4)-methyl-2,4-diaminobutanoic-acid	2	DB03458	-6.77916	0.52768	5.2391	381.393	6.04383	1787	1883	2639	607	1523.7	1620	2070.8	2418	N(4)-adenosyl-n(4)-methyl-2,4-diaminobutanoic acid is a solid. This compound belongs to the purine nucleosides and analogues. These are compounds comprising a purine base attached to a sugar.	NA
NALPHA-[(BENZYLOXY)CARBONYL]-N-[(1R)-4-HYDROXY-1-METHYL-2-OXOBUTYL]-L-PHENYLALANINAMIDE	1	DB08732	-6.67556	0.36913	5.75703	398.459	6.04318	1933	3037	1776	608	1586.74	1739	2184.61	2616	NA	rep,1a
Bunamiodyl	1	DB04814	-6.09924	0.74316	6.99061	639.009	6.04312	2640	561	73	609	506.555	214	476.391	260	Withdrawn from the Canadian, US, and UK markets in 1963 due to nephropathy.	NA
Cloxacillin	7	DB01147	-7.03588	0.32345	6.07879	435.889	6.04258	1403	3360	1148	610	1347.93	1312	1755.68	1931	A semi-synthetic antibiotic that is a chlorinated derivative of oxacillin.	pbpA,ampC,pbp2a,penA,pbpB,dacA
2,5-O,O-BIS-{4',4''-AMIDINOPHENYL}-1,4:3,6-DIANHYDRO-D-SORBITOL	6	DB04792	-7.10073	0.61604	5.55799	382.42	6.0418	1299	1260	2145	611	1210.21	1091	1519.86	1576	NA	PRSS1
Saxagliptin	5	DB06335	-7.78457	0.55158	6.39496	315.417	6.04167	576	1724	589	612	773.493	486	836.293	644	Saxagliptin (rINN) is an orally active hypoglycemic (anti-diabetic drug) of the new dipeptidyl peptidase-4 (DPP-4) inhibitor class of drugs. FDA approved on July 31, 2009.	DPP4
(3R,4S)-1-(3,4-DIMETHOXYPHENYL)-3-(3-METHYLPHENYL)PIPERIDIN-4-AMINE	0	DB07851	-7.09389	0.13234	5.52287	326.44	6.04112	1311	4308	2203	613	1661.84	1874	2317.2	2809	NA	DPP4
THIAMPHENICOL	3	DB08621	-5.86497	0.46257	5.24465	356.227	6.04104	2886	2375	2631	614	1824.16	2149	2622.37	3250	NA	draA
N-(5-CHLORO-BENZO[B]THIOPHEN-3-YLMETHYL)-2-[6-CHLORO-OXO-3-(2-PYRIDIN-2-YL-ETHYLAMINO)-2H-PYRAZIN-1-YL]-ACETAMIDE	0	DB07165	-7.45519	0.22713	6.20511	492.432	6.04056	880	3920	874	615	1166.91	1033	1444.64	1455	NA	F2
Amphetamine	3	DB00182	-4.40045	0.44275	3.86047	135.21	6.03982	3952	2515	3907	616	2211.54	2799	3386.36	4144	"Amphetamine, a compound discovered over 100 years ago, is one of the more restricted controlled drugs. It was previously used for a large variety of conditions and this changed until this point where its use is highly restricted. Amphetamine, with the chemical formula alpha-methylphenethylamine, was discovered in 1910 and first synthesized by 1927. After being proven to reduce drug-induced anest…	SLC18A2,SLC6A3,CARTPT,TAAR1
5-chloro-N-[(3R)-1-(2-{[2-fluoro-4-(2-oxopyridin-1(2H)-yl)phenyl]amino}-2-oxoethyl)pyrrolidin-3-yl]thiophene-2-carboxamide	2	DB07872	-6.90945	0.13171	5.89997	474.945	6.03886	1595	4313	1503	617	1589.26	1748	2178.54	2606	NA	F10
Methamphetamine	1	DB01577	-4.51687	0.38193	3.97645	149.237	6.03786	3889	2943	3829	618	2281.26	2902	3525.64	4270	Metamfetamine (methamphetamine) is a psychostimulant and sympathomimetic drug. It is a member of the amphetamine group of sympathomimetic amines. Methamphetamine can induce effects such as euphoria, increased alertness and energy, and enhanced self-esteem. It is a scheduled drug in most countries due to its high potential for addiction and abuse.	MAOA,MAOB,SLC6A3,SLC6A4,SLC6A2,SLC18A2,SLC18A1,TAAR1,ADRA2A,ADRA2B,ADRA2C
Lucanthone	0	DB04967	-6.54651	0.31353	5.40768	340.492	6.03753	2106	3422	2380	619	1805.1	2112	2578.92	3185	One of the schistosomicides, it has been replaced largely by hycanthone and more recently praziquantel. (From Martindale The Extrapharmacopoeia, 30th ed., p46). It is currently being tested as a radiation sensitizer.	TOP2A,APEX1,Not-Available,TOP1
2-Oxo-Glutaric-Acid	2	DB08845	-4.06044	0.30399	3.24962	146.098	6.03736	4103	3481	4302	620	2484.37	3226	3946.01	4470	Oxogluric acid (伪-Ketoglutarate) is not approved for any indication in the world but is an investigational drug in the United States. In the United States a phase I clinical trial is investigating whether oxogluric acid precursors found in nutritional supplements can benefit patients with the metabolic disorder propionic acidemia. Oxogluric acid is sold as a dietary supplement to athletes to impr…	NA
Moxifloxacin	0	DB00218	-7.19342	0.07703	6.07529	401.438	6.03727	1183	4453	1156	621	1394.51	1387	1826.13	2055	Moxifloxacin is a synthetic fluoroquinolone antibiotic agent. Bayer AG developed the drug (initially called BAY 12-8039) and it is marketed worldwide (as the hydrochloride) under the brand name Avelox (in some countries also Avalox) for oral treatment.	parC,gyrA,TOP2A
(2R,4S)-2-[(R)-BENZYLCARBAMOYL-PHENYLACETYL-METHYL]-5,5-DIMETHYL-THIAZOLIDINE-4-CARBOXYLIC-ACID	1	DB07806	-7.38098	0.22277	5.67564	441.553	6.03454	962	3946	1935	622	1462.01	1517	1943.89	2237	NA	gag-pol
Cloxazolam	0	DB01553	-7.71448	0.34828	6.02736	349.217	6.03398	643	3201	1239	623	1122.7	968	1366.23	1333	Cloxazolam is a benzodiazepine with anxiolytic, sedative/hypnotic, muscle relaxant, and antiepileptic effects. It is marketed in the Argentina, Australia, Portugal, Belgium, Switzerland, Luxembourg, Germany, Taiwan and Japan -- mainly for anti-anxiety. The usual dose of cloxazolam in adults is 3-12mg/day for anti-anxiety. Although less commonly noted, it has also been reported as clinically effec…	NA
2-(2,6-DIFLUOROPHENOXY)-N-(2-FLUOROPHENYL)-9-ISOPROPYL-9H-PURIN-8-AMINE	1	DB08097	-7.22237	0.61705	6.92209	399.376	6.03109	1149	1254	109	624	559.509	258	539.529	316	NA	MAPK14
Diethylphosphono-Group	0	DB02811	-3.09909	0.71795	3.2628	138.103	6.03107	4373	694	4298	625	1689.75	1917	2353.97	2858	NA	BCHE,fbpC
Xanthine	2	DB02134	-4.55708	0.71794	4.16986	152.113	6.03084	3862	695	3692	626	1578.19	1721	2147.93	2563	A purine base found in most body tissues and fluids, certain plants, and some urinary calculi. It is an intermediate in the degradation of adenosine monophosphate to uric acid, being formed by oxidation of hypoxanthine. The methylated xanthine compounds caffeine, theobromine, and theophylline and their derivatives are used in medicine for their bronchodilator effects. (Dorland, 28th ed)	xapA,gpt
(2R)-4-(2-BENZOYL-1,2-DIAZEPAN-1-YL)-4-OXO-1-(2,4,5-TRIFLUOROPHENYL)BUTAN-2-AMINE	5	DB08051	-7.55714	0.1941	6.04656	419.447	6.0306	785	4075	1206	627	1247.11	1149	1568.37	1660	NA	DPP4
Oxalic-Acid	8	DB03902	-2.50665	0.59227	2.55502	90.034	6.0304	4451	1434	4495	628	2060.27	2545	3061.34	3820	A strong dicarboxylic acid occurring in many plants and vegetables. It is produced in the body by metabolism of glyoxylic acid or ascorbic acid. It is not metabolized but excreted in the urine. It is used as an analytical reagent and general reducing agent. [PubChem]	SRC
2-Amino-3-Methyl-1-Pyrrolidin-1-Yl-Butan-1-One	2	DB01884	-4.61788	0.42435	4.40848	170.256	6.02864	3824	2658	3481	629	2171.99	2733	3282.91	4046	NA	DPP4
3,8-DIBROMO-7-HYDROXY-4-METHYL-2H-CHROMEN-2-ONE	0	DB07802	-6.18464	0.56844	4.86741	333.963	6.02861	2547	1607	3081	630	1678.88	1904	2327.62	2823	NA	CSNK2A1
Hydroxyaminovaline	5	DB02697	-4.01152	0.44582	3.69196	132.163	6.0285	4126	2492	3996	631	2256.49	2861	3450.65	4204	NA	MMP13,MMP3
Pivampicillin	3	DB01604	-7.17557	0.61917	6.38736	463.556	6.02764	1208	1241	603	632	869.397	596	966.908	806	Pivalate ester analog of ampicillin.	pbpA
Spironolactone	0	DB00421	-8.81461	0.2881	6.40222	416.583	6.0274	103	3579	584	633	607.581	300	599.336	385	"Spironolactone is a potassium sparing diuretic like [eplerenone] that competitively inhibits mineralocorticoid receptors in the distal convoluted tubule to promote sodium and water excretion and potassium retention.[A11837]. Spironolactone was originally developed purely for this ability before other pharmacodynamic properties of the drug were discovered.[A11837,A178246] It is indicated to treat…	NR3C2,AR
2-METHYL-2-(4-{[({4-METHYL-2-[4-(TRIFLUOROMETHYL)PHENYL]-1,3-THIAZOL-5-YL}CARBONYL)AMINO]METHYL}PHENOXY)PROPANOIC-ACID	3	DB07215	-7.2104	0.65241	6.31631	478.492	6.02649	1163	1048	703	634	858.512	581	949.8	792	NA	NCOA1,PPARA
(3aS,4R,9bR)-2,2-difluoro-4-(4-hydroxyphenyl)-6-(methoxymethyl)-1,2,3,3a,4,9b-hexahydrocyclopenta[c]chromen-8-ol	1	DB07036	-7.84019	0.28974	5.90857	362.372	6.02641	527	3566	1486	635	1153.97	1010	1408.22	1404	NA	ESR2
5-{[Ethyl(Methyl)Amino]Methyl}-2-Methyl-5,6-Dihydropyrimidin-4-Amine	1	DB03653	-4.97549	0.90985	5.08572	180.255	6.02634	3598	79	2830	636	845.732	565	930.018	773	NA	NA
2-((9H-PURIN-6-YLTHIO)METHYL)-5-CHLORO-3-(2-METHOXYPHENYL)QUINAZOLIN-4(3H)-ONE	0	DB06831	-8.02299	0.14386	6.35924	450.911	6.02539	412	4279	643	637	921.823	654	1042.68	895	NA	PIK3CG,PIK3CD
BIOTINOL-5-AMP	0	DB04651	-7.30477	0.12137	5.53159	559.542	6.02453	1041	4354	2187	638	1585.81	1734	2148.14	2564	NA	birA
2-AMINO-4-FLUORO-5-[(1-METHYL-1H-IMIDAZOL-2-YL)SULFANYL]-N-(1,3-THIAZOL-2-YL)BENZAMIDE	6	DB08210	-5.84636	0.3122	6.12867	349.416	6.02448	2901	3434	1027	639	1599.02	1757	2170.9	2596	NA	GCK
Benzofuran	0	DB04179	-4.41149	0.83692	3.82715	118.135	6.0231	3947	226	3927	640	1223.64	1111	1518.72	1574	NA	E
Tropinone	1	DB01874	-4.74643	0.73663	3.78475	139.198	6.02301	3746	600	3952	641	1544.72	1661	2070.99	2419	NA	NA
Folic-Acid	3	DB00158	-7.35934	0.67909	6.1309	441.404	6.02277	979	906	1019	642	872.78	599	966.856	805	"Folic acid, also known as folate or Vitamin B9, is a member of the B vitamin family and an essential cofactor for enzymes involved in DNA and RNA synthesis. More specifically, Folic acid is required by the body for the synthesis of purines, pyrimidines, and methionine before incorporation into DNA or protein. Folic acid is particularly important during phases of rapid cell division, such as infa…	FOLR2,FOLR3
Phenylephrine	1	DB00388	-5.1432	0.74155	4.10882	167.208	6.02205	3483	572	3731	643	1478.59	1546	1951.6	2251	Phenylephrine is a sympathomimetic amine that acts predominantly on &alpha;-adrenergic receptors. It is mainly used to treat nasal congestion, but may also be useful in treating hypotension and shock, hypotension during spinal anaesthesia, prolongation of spinal anaesthesia, paroxysmal supraventricular tachycardia, symptomatic relief of external or internal hemorrhoids, and to increase blood pres…	ADRA1A,ADRA1B,ADRA1D
Morpholine-4-Carboxylic-Acid-(1-(3-Benzenesulfonyl-1-Phenethylallylcarbamoyl)-3-Methylbutyl)-Amide	7	DB03837	-6.64387	0.22979	6.34894	527.687	6.02172	1980	3906	655	644	1343.94	1305	1717.43	1864	NA	CTSS
Budesonide	2	DB01222	-9.56402	0.6155	6.27697	430.541	6.02041	14	1265	773	645	306.542	82	239.221	80	Budesonide is a glucocorticoid used in the management of asthma, the treatment of various skin disorders, and allergic rhinitis. [PubChem] The extended release oral tablet, marketed as Uceris, was FDA approved on January 14, 2013 for the management of ulcerative colitis. Budesonide is provided as a mixture of two epimers (22R and 22S). Interestingly, the 22R form is two times more active than the…	NR3C1
Vardenafil	2	DB00862	-6.64252	0.2064	6.43533	488.614	6.01971	1982	4009	539	646	1289.7	1223	1623.96	1747	Vardenafil (Levitra) is an oral therapy for the treatment of erectile dysfunction. It is a selective inhibitor of cyclic guanosine monophosphate (cGMP)-specific phosphodiesterase type 5 (PDE5). Penile erection is a hemodynamic process initiated by the relaxation of smooth muscle in the corpus cavernosum and its associated arterioles. During sexual stimulation, nitric oxide is released from nerve …	PDE5A,PDE6G,PDE6H
Amiodarone	1	DB01118	-6.10981	0.15731	6.22565	645.319	6.01906	2629	4221	840	647	1567.1	1698	2104.56	2481	An antianginal and antiarrhythmic drug. It increases the duration of ventricular and atrial muscle action by inhibiting Na,K-activated myocardial adenosine triphosphatase. There is a resulting decrease in heart rate and in vascular resistance.	KCNH2,ADRB1,CACNA1H,CACNA2D2
N-Phenylthiourea	4	DB03694	-3.9472	0.52639	3.89852	152.222	6.01773	4148	1891	3877	648	2106.93	2624	3121.35	3885	NA	NA
3-Fluoro-2-Methyl-Aniline	0	DB01986	-4.45229	0.40222	3.60734	125.146	6.01668	3923	2810	4068	649	2322.67	2968	3552.78	4293	NA	E
Mefloquine	1	DB00358	-7.74197	0.75081	6.3014	378.316	6.01645	618	521	726	650	624.337	320	616.01	398	A phospholipid-interacting antimalarial drug (antimalarials). It is very effective against plasmodium falciparum with very few side effects. [PubChem]	Not-Available,HBA1,ADORA2A
Nicotinamide	0	DB02701	-4.07514	0.71956	3.51554	122.127	6.01553	4094	679	4129	651	1653.34	1862	2255.73	2730	An important compound functioning as a component of the coenzyme NAD. Its primary significance is in the prevention and/or cure of blacktongue and pellagra. Most animals cannot manufacture this compound in amounts sufficient to prevent nutritional deficiency and it therefore must be supplemented through dietary intake.	eta,LDHA,PARP1,SIRT5,BST1
1-[(3S)-5-PHENYL-3-THIOPHEN-2-YL-3H-1,4-BENZODIAZEPIN-2-YL]AZETIDIN-3-OL	6	DB08698	-6.47125	0.18757	5.91522	373.481	6.01447	2194	4101	1474	652	1714.82	1961	2367.05	2874	NA	murI
N,N'-DIPHENYLPYRAZOLO[1,5-A][1,3,5]TRIAZINE-2,4-DIAMINE	7	DB08340	-6.28363	0.3108	5.77957	302.341	6.01439	2431	3441	1732	653	1753.81	2027	2437.84	2989	NA	CSNK2A1
1-[2-(4-ETHOXY-3-FLUOROPYRIDIN-2-YL)ETHYL]-3-(5-METHYLPYRIDIN-2-YL)THIOUREA	0	DB08372	-5.94175	0.2037	5.93027	334.42	6.01303	2816	4028	1442	654	1808.49	2117	2538.41	3132	NA	gag-pol,gag-pol
Ritonavir	3	DB00503	-6.96086	0.0457	6.27072	720.962	6.01292	1521	4490	779	655	1366.28	1338	1745.71	1910	"Ritonavir is an HIV protease inhibitor that interferes with the reproductive cycle of HIV. Although it was initially developed as an independent antiviral agent, it has been shown to possess advantageous properties in combination regimens with low-dose ritonavir and other protease inhibitors. It is now more commonly used as a booster of other protease inhibitors and is available in both liquid f…	HIV-1-protease
Midazolam	2	DB00683	-7.51197	0.60721	6.54513	325.774	6.01179	823	1321	398	656	729.915	432	756.36	548	"Midazolam is a short-acting hypnotic-sedative drug with anxiolytic, muscle relaxant, anticonvulsant, sedative, hypnotic, and amnesic properties.[A173842] It belongs to a class of drugs called _benzodiazepines_. This drug is unique from others in this class due to its rapid onset of effects and short duration of action.[A173842] Midazolam is available by oral, rectal, intranasal, intramuscular (I…	GABRG1,GABRG2,GABRG3,GABRD,GABRE,GABRP,GABRR1,GABRR2,GABRR3,GABRQ,GABRA1,GABRA2,GABRA3,GABRA4,GABRA5,GABRB1,GABRB3,GABRB2,GABRA6
2-Bromoacetyl-Group	1	DB02198	-2.54033	0.7485	2.78256	138.948	6.01166	4449	528	4473	657	1620.93	1801	2190.27	2629	NA	PTGS1
Beta-Hydroxyasparagine	3	DB04527	-3.8492	0.71693	3.59201	148.118	6.01067	4184	700	4080	658	1674.53	1896	2286.21	2779	NA	MASP2
Methylphosphonic-Acid-Ester-Group	0	DB02825	-2.22014	0.71253	2.5752	79.015	6.00973	4478	721	4492	659	1758.27	2035	2438.67	2990	NA	ACHE
Darunavir	0	DB01264	-7.35347	0.28178	6.5768	547.674	6.00946	985	3611	361	660	959.464	703	1086.9	940	Darunavir is a protease inhibitor used to treat HIV. It acts on the HIV aspartyl protease which the virus needs to cleave the HIV polyprotein into its functional fragments.	HIV-1-protease
1,3-CYCLOHEXANEDIOL,-4-METHYLENE-5-[(2E)-[(1S,3AS,7AS)-OCTAHYDRO-1-(5-HYDROXY-5-METHYL-1,3-HEXADIYNYL)-7A-METHYL-4H-INDEN-4-YLIDENE]ETHYLIDENE]-,-(1R,3S,5Z)	0	DB08742	-8.53136	0.64514	6.53112	394.555	6.00888	190	1082	411	661	486.134	195	438.808	226	NA	NCOA1,VDR
(3S)-N-(3-BROMOPHENYL)-1-CYCLOHEXYL-5-OXOPYRROLIDINE-3-CARBOXAMIDE	1	DB07192	-7.06911	0.46791	5.80976	365.271	6.00838	1343	2332	1671	662	1364.3	1332	1736.18	1897	NA	inhA
N-(CYCLOPROPYLMETHYL)-4-(METHYLOXY)-3-({5-[3-(3-PYRIDINYL)PHENYL]-1,3-OXAZOL-2-YL}AMINO)BENZENESULFONAMIDE	3	DB07333	-7.22847	0.67986	7.25023	476.558	6.0078	1144	903	20	663	342.109	104	274.398	101	NA	KDR
Aminorex	0	DB01490	-5.26812	0.72187	4.09354	162.192	6.00656	3393	665	3742	664	1538.75	1652	2036.28	2362	Aminorex is an amphetamine-like anorectic agent. It may cause pulmonary hypertension.	NA
Desonide	5	DB01260	-8.80781	0.56457	6.23393	416.514	6.00542	105	1630	831	665	554.562	252	521.987	298	A nonfluorinated corticosteroid anti-inflammatory agent used topically for dermatoses.	NR3C1
N-ACETYLHISTAMINE	4	DB04622	-3.91799	0.71068	4.3269	153.185	6.00472	4155	728	3568	666	1637.38	1829	2209.92	2655	NA	QPCT
4-({(2R,5S)-2,5-DIMETHYL-4-[(2R)-3,3,3-TRIFLUORO-2-HYDROXY-2-METHYLPROPANOYL]PIPERAZIN-1-YL}CARBONYL)BENZONITRILE	1	DB08608	-7.43778	0.78142	6.5191	383.37	6.00469	909	399	430	667	567.914	264	538.272	313	NA	PDK2
Ethylisothiourea	3	DB02234	-2.70384	0.75784	3.44308	104.178	6.00467	4431	491	4185	668	1570.41	1707	2088.14	2451	S-Ethylisothiourea is a nitric oxide synthase inhibitor.	nos,NOS2,NOS3
S-Ethylisothiourea	5	DB02234	-2.67727	0.75401	3.27147	104.178	6.00467	4432	506	4286	669	1592.42	1751	2126.18	2519	S-Ethylisothiourea is a nitric oxide synthase inhibitor.	nos,NOS2,NOS3
(6,7-Dihydro-5h-Cyclopenta[D]Imidazo[2,1-B]Thiazol-2-Yl]-4,7-Dihydro[1,4]Thiazepine-3,6-Dicarboxylic-Acid	0	DB03970	-6.85416	0.1693	5.5196	363.42	6.00413	1676	4174	2209	670	1793.8	2092	2490.81	3049	NA	ampC,bla,bla,Not-Available
4-Methoxyamphetamine	2	DB01472	-4.80163	0.34721	4.13389	165.236	6.00411	3707	3205	3717	671	2333.14	2987	3534.66	4281	NA	SLC6A3,SLC6A4,SLC18A2,ADRA1A,ADRA2A,MAOA,MAOB
N-cyclopropyl-4-methyl-3-[1-(2-methylphenyl)phthalazin-6-yl]benzamide	2	DB07307	-8.04445	0.66962	6.49456	393.49	6.00338	401	953	461	672	586.579	281	560.591	337	NA	MAPK14
N'-(5-chloro-1,3-benzodioxol-4-yl)-N-(3-methylsulfonylphenyl)pyrimidine-2,4-diamine	0	DB07253	-7.99741	0.9518	7.33986	418.862	6.00057	425	15	13	673	86.4191	9	43.5988	6	NA	EPHB4
Alfuzosin	2	DB00346	-6.32032	0.30551	6.28092	389.456	6.00053	2385	3468	762	674	1435.64	1460	1847.17	2093	Alfuzosin (INN, provided as the hydrochloride salt) is an alpha-adrenergic blocker used to treat benign prostatic hyperplasia (BPH). It works by relaxing the muscles in the prostate and bladder neck, making it easier to urinate.	ADRA1A,ADRA1B,ADRA1D
Arbekacin	2	DB06696	-8.27035	0.2778	5.65101	552.626	6.00015	280	3637	1986	675	1080.93	907	1264.62	1193	An semisynthetic aminoglycoside antibiotic. Often used for treatment of multi-resistant bacterial infection such as methicillin-resistant _Staphylococcus aureus_ (MRSA). Amikacin is also nephrotoxic and ototoxic.	rpsL
(2S)-1-{[5-(3-METHYL-1H-INDAZOL-5-YL)PYRIDIN-3-YL]OXY}-3-PHENYLPROPAN-2-AMINE	3	DB08568	-7.47032	0.92039	6.95359	358.445	5.99953	863	65	93	676	243.69	54	173.435	45	NA	PRKACA,PKIA
Ampicillin	0	DB00415	-7.23852	0.69679	5.67726	349.412	5.99903	1127	807	1931	677	1044.22	836	1206.5	1103	Ampicillin is a semi-synthetic derivative of penicillin that functions as an orally active broad-spectrum antibiotic.	pbp2a,pbp1b,pbp3,pbpA,penA
8-(2-CHLOROPHENYLAMINO)-2-(2,6-DIFLUOROPHENYLAMINO)-9-ETHYL-9H-PURINE-1,7-DIIUM	2	DB08096	-6.96351	0.60698	6.91754	400.82	5.9981	1515	1323	114	678	627.374	325	611.354	394	NA	MAPK14
Cyanamide	1	DB02679	-1.81131	0.76743	2.85583	42.041	5.99769	4491	448	4450	679	1570.23	1706	2076.48	2425	A cyanide compound which has been used as a fertilizer, defoliant and in many manufacturing processes. It often occurs as the calcium salt, sometimes also referred to as cyanamide. The citrated calcium salt is used in the treatment of alcoholism. [PubChem]	CA2
3-bromo-6-phenyl-N-(pyrimidin-5-ylmethyl)imidazo[1,2-a]pyridin-8-amine	0	DB08537	-7.01207	0.30282	6.12748	380.249	5.99762	1437	3488	1030	680	1368.82	1344	1728.32	1886	NA	CDK2
N~3~-[3-(1H-INDOL-6-YL)BENZYL]PYRIDINE-2,3-DIAMINE	0	DB07993	-7.89499	0.20857	5.80234	314.392	5.99658	494	4000	1689	681	1227.84	1118	1494.42	1526	NA	BACE1
Tafluprost	9	DB08819	-6.30393	0.13619	5.89213	452.538	5.99545	2409	4302	1518	682	1809.84	2121	2505.68	3079	A prostaglandin analogue ester prodrug used topically (as eye drops) to control the progression of glaucoma and in the management of ocular hypertension. Chemically, tafluprost is a fluorinated analog of prostaglandin F2-alpha. Tafluprost was approved for use in the U.S. on February 10, 2012.	PTGFR
(2R,4R)-N~1~-(4-CHLOROPHENYL)-N~2~-[2-FLUORO-4-(2-OXOPYRIDIN-1(2H)-YL)PHENYL]-4-METHOXYPYRROLIDINE-1,2-DICARBOXAMIDE	0	DB06920	-7.59956	0.09905	6.28803	484.915	5.99534	751	4405	751	683	1141.33	995	1354.38	1317	NA	F10
4-{2,4-Bis[(3-Nitrobenzoyl)Amino]Phenoxy}Phthalic-Acid	1	DB03067	-7.77296	0.14429	6.01589	586.469	5.99476	589	4275	1263	684	1214.44	1097	1470.57	1498	NA	PYGM
2-(2-QUINOLIN-3-YLPYRIDIN-4-YL)-1,5,6,7-TETRAHYDRO-4H-PYRROLO[3,2-C]PYRIDIN-4-ONE	0	DB08358	-8.41258	0.47385	6.42808	340.386	5.99421	230	2295	549	685	667.488	364	661.751	447	NA	MAPKAPK2,MAPKAPK3
[4-(6-Chloro-Naphthalene-2-Sulfonyl)-Piperazin-1-Yl]-(3,4,5,6-Tetrahydro-2h-[1,4']Bipyridinyl-4-Yl)-Methanone	1	DB01836	-7.77508	0.16109	6.24644	499.036	5.99239	586	4205	808	686	1081.06	908	1258.03	1186	NA	PRSS1
Forskolin	0	DB02587	-9.84398	0.666	5.97627	410.507	5.99185	10	976	1352	687	308.564	85	236.306	79	Potent activator of the adenylate cyclase system and the biosynthesis of cyclic AMP. From the plant Coleus forskohlii. Has antihypertensive, positive inotropic, platelet aggregation inhibitory, and smooth muscle relaxant activities; also lowers intraocular pressure and promotes release of hormones from the pituitary gland.	ADCY2,GNAS,ADCY5
N-[(2R,3S)-1-((2S)-2-{[(CYCLOPENTYLAMINO)CARBONYL]AMINO}-3-METHYLBUTANOYL)-2-(1-FORMYL-1-CYCLOBUTYL)PYRROLIDINYL]CYCLOPROPANECARBOXAMIDE	0	DB07582	-6.68827	0.22397	6.30418	446.592	5.99114	1918	3938	722	688	1391.75	1382	1760.17	1936	NA	Not-Available,Not-Available
3(S)-AMINO-4-PHENYL-BUTAN-2(S)-OL	2	DB08428	-4.83965	0.4917	4.23074	165.236	5.99064	3687	2156	3647	689	2114.07	2632	3071.99	3831	NA	gag-pol,gag-pol
1-{3-oxo-3-[(2S)-2-(pyrrolidin-1-ylcarbonyl)pyrrolidin-1-yl]propyl}-3-phenylquinoxalin-2(1H)-one	6	DB08738	-7.57829	0.31179	6.58367	444.535	5.9902	765	3437	353	690	894.574	623	975.45	822	NA	PREP
5-(4'-AMINO-1'-ETHYL-5',8'-DIFLUORO-1'H-SPIRO[PIPERIDINE-4,2'-QUINAZOLINE]-1-YLCARBONYL)PICOLINONITRILE	0	DB06879	-8.85128	0.34946	6.82314	412.444	5.98989	100	3195	157	691	431.481	158	368.799	162	NA	NOS2
(R)-(+)-5(9BH)-OXO-9B-PHENYL-2,3-DIHYDROTHIAZOLO[2,3-A]ISOINDOL-3-CARBOXYLIC-ACID-METHYL-ESTER	0	DB07473	-7.21416	0.42925	5.69855	325.389	5.98947	1158	2617	1890	692	1410.98	1421	1789.2	1991	NA	gag-pol
2,6-Diamino-Hexanoic-Acid-Amide	0	DB03988	-4.41091	0.6505	4.39914	146.214	5.98882	3948	1058	3491	693	1782.94	2071	2443.08	2994	NA	ADCYAP1
Pipobroman	1	DB00236	-5.16149	0.58892	5.03006	356.058	5.98861	3468	1456	2899	694	1785.3	2077	2446.22	2997	An antineoplastic agent that acts by alkylation.	Not-Available
N-(2-AMINOETHYL)-P-CHLOROBENZAMIDE	6	DB08082	-4.82591	0.54844	4.03612	199.637	5.98739	3692	1752	3784	695	2030.87	2495	2903.46	3618	NA	MAOB
Tagetitoxin	9	DB04788	-6.26058	0.48702	4.89837	416.301	5.9872	2460	2193	3053	696	1840.04	2181	2544.29	3141	Tagetitoxin is a bacterial phytotoxin. It preferentially inhibits eukaryotic RNA polymerase.	rpoB,rpoC
Podofilox	2	DB01179	-7.24781	0.37209	6.06855	414.41	5.98712	1117	3001	1168	697	1285.28	1214	1576.11	1671	A lignan found in podophyllin resin from the roots of podophyllum plants. It is a potent spindle poison, toxic if taken internally, and has been used as a cathartic. It is very irritating to skin and mucous membranes, has keratolytic actions, has been used to treat warts and keratoses, and may have antineoplastic properties, as do some of its congeners and derivatives.	TOP2A,TUBA4A,TUBB
N2-[(Benzyloxy)Carbonyl]-N1-[(3s)-1-Cyanopyrrolidin-3-Yl]-L-Leucinamide	0	DB03456	-6.10545	0.05844	5.2614	358.442	5.98676	2634	4474	2607	698	2151.92	2702	3131.97	3895	N2-[(benzyloxy)carbonyl]-n1-[(3S)-1-cyanopyrrolidin-3-yl]-l-leucinamide is a solid. This compound belongs to the n-acyl-alpha amino acids and derivatives. These are compounds containing an alpha amino acid (or a derivative thereof) which bears an acyl group at its terminal nitrogen atom. It is known to target cathepsin K.	CTSK
3-[(1s)-1-(Dimethylamino)Ethyl]Phenol	0	DB04556	-4.96166	0.57156	4.00926	165.236	5.98616	3608	1585	3804	699	1974.71	2412	2791.55	3494	NA	ACHE
Cephalexin	0	DB00567	-7.65415	0.52504	5.80601	347.396	5.98542	699	1899	1680	700	1117.77	962	1306.48	1258	Cephalexin is the first of the first generation cephalosporins.[A179071,A179074] This antibiotic contains a beta lactam and a dihydrothiazide.[A179071] Cephalexin is used to treat a number of susceptible bacterial infections through inhibition of cell wall synthesis.[A179083,Label] Cephalexin was approved by the FDA on 4 January 1971.[L6547]	pbp3,pbp2a,pbp1b,penA,pbpA
2-[3-({Methyl[1-(2-Naphthoyl)Piperidin-4-Yl]Amino}Carbonyl)-2-Naphthyl]-1-(1-Naphthyl)-2-Oxoethylphosphonic-Acid	0	DB04016	-9.15738	0.05998	5.96027	670.702	5.98527	47	4473	1388	701	672.514	371	663.278	451	NA	CTSG,CMA1
Adenosine-5-Diphosphoribose	1	DB02059	-7.6456	0.10004	4.86034	559.318	5.98483	711	4403	3089	702	1614.15	1788	2130.49	2528	NA	ndx4,SIRT3,rfbG,EEF2,GAPDH,fucO,SIRT5,pobA,nudF,MT1739,nudE
{[2-(1h-1,2,3-Benzotriazol-1-Yl)-2-(3,4-Difluorophenyl)Propane-1,3-Diyl]Bis[4,1-Phenylene(Difluoromethylene)]}Bis(Phosphonic-Acid)	6	DB02651	-8.09385	0.12622	6.59596	685.454	5.98473	367	4337	343	703	787.093	504	817.303	617	NA	PTPN1
3-Methylcytosine	1	DB04103	-4.13962	0.86046	3.91277	126.139	5.98447	4072	177	3870	704	1183.77	1050	1407.66	1400	NA	PAPS
N-{1-[(1-carbamoylcyclopropyl)methyl]piperidin-4-yl}-N-cyclopropyl-4-[(1S)-2,2,2-trifluoro-1-hydroxy-1-methylethyl]benzamide	4	DB07316	-6.69749	0.35192	6.22495	453.505	5.98431	1907	3180	841	705	1377.02	1362	1721.31	1872	NA	HSD11B1
Adenylosuccinic-Acid	0	DB04418	-7.70739	0.23665	5.11955	463.296	5.98416	648	3870	2784	706	1490.01	1571	1911.25	2183	NA	ADSSL1
7-(2-Amino-2-Phenyl-Acetylamino)-3-Chloro-8-Oxo-1-Aza-Bicyclo[4	0	DB04293	-7.9122	0.51962	5.79936	349.774	5.98336	482	1937	1691	707	1027.86	813	1164.41	1036	NA	ampC
4-(2-AMINOETHYL)BENZENESULFONYL-FLUORIDE	3	DB07347	-4.94269	0.49043	4.57724	203.238	5.98273	3616	2167	3328	708	2072.89	2569	2965.45	3695	NA	GAPDH,ATP6V1B2
3-[[(METHYLAMINO)SULFONYL]AMINO]-2-OXO-6-PHENYL-N-[3,3,3-TRIFLUORO-1-(1-METHYLETHYL)-2-OXOPHENYL]-1(2H)-PYRIDINE-ACETAMIDE	0	DB08614	-6.97443	0.13904	6.1263	488.488	5.9825	1504	4293	1032	709	1474.29	1540	1881.75	2135	NA	CELA1
2-CHLORO-4-ISOPROPYLAMINO-6-ETHYLAMINO--1,3,5-TRIAZINE	0	DB07392	-4.81388	0.72183	5.03269	215.688	5.98028	3701	666	2895	710	1500.29	1583	1925.22	2201	NA	pufC,puhA,pufL,pufM
2-({2-[(3R)-3-AMINOPIPERIDIN-1-YL]-4-OXOQUINAZOLIN-3(4H)-YL}METHYL)BENZONITRILE	0	DB08588	-8.09081	0.78306	6.87451	359.433	5.97942	369	392	131	711	340.693	100	266.601	97	NA	DPP4
4-{2-[4-(2-Aminoethyl)Piperazin-1-Yl]Pyridin-4-Yl}-N-(3-Chloro-4-Methylphenyl)Pyrimidin-2-Amine	1	DB03916	-7.51044	0.29413	6.36426	423.952	5.97756	825	3539	639	712	1073.57	893	1231.06	1139	NA	zipA,zipA
2-Methylbutanoic-Acid	6	DB03741	-3.20014	0.70136	3.39697	102.133	5.97717	4348	773	4213	713	1782.53	2069	2419.28	2956	NA	cumD
Adefovir-Dipivoxil	0	DB00718	-6.20933	0.22417	5.95633	501.477	5.97708	2519	3936	1397	714	1773.35	2054	2401.56	2928	Adefovir dipivoxil, previously called bis-POM PMEA, with trade names Preveon and Hepsera, is an orally-administered acyclic nucleotide analog reverse transcriptase inhibitor (ntRTI) used for treatment of hepatitis B. It is ineffective against HIV-1. Adefovir dipivoxil is the diester prodrug of adefovir.	P
4-[(1E,7E)-8-(2,6-DIOXO-1,2,3,6-TETRAHYDROPYRIMIDIN-4-YL)-3,6-DIOXA-2,7-DIAZAOCTA-1,7-DIEN-1-YL]BENZOIC-ACID	0	DB06990	-6.87854	0.14182	5.26455	346.299	5.97622	1642	4284	2601	715	1901.81	2278	2635.04	3268	NA	UNG
3-hydroxyglutaric-acid	1	DB04594	-4.11927	0.3732	3.27594	148.114	5.97599	4081	2995	4282	716	2474.18	3216	3740.56	4414	NA	HMGCL
N6-ISOPENTENYL-ADENOSINE-5'-MONOPHOSPHATE	0	DB07205	-7.34698	0.73907	5.55866	417.359	5.97488	988	585	2141	717	970.537	732	1073.6	925	NA	YARS
3-Benzylaminocarbonylphenyl-Alpha-D-Galactoside	0	DB03446	-8.16743	0.74671	5.33801	389.404	5.97445	325	538	2483	718	747.208	461	757.206	549	NA	eltB
SR11254	2	DB02258	-9.55485	0.50125	6.47495	401.506	5.97414	16	2080	483	719	327.88	94	252.373	86	NA	RARG
Ethyl-Dihydrogen-Phosphate	5	DB03822	-3.00214	0.46852	3.24409	126.048	5.97245	4393	2328	4305	720	2372.81	3062	3531.07	4275	NA	opd,BCHE
octyl-3-amino-3-deoxy-2-O-(2,6-dideoxy-alpha-L-lyxo-hexopyranosyl)-beta-D-galactopyranoside	0	DB07341	-6.91816	0.60513	5.86631	421.531	5.97239	1583	1336	1562	721	1242.3	1142	1489.32	1521	NA	ABO
3,4-bis(7-chloro-1H-indol-3-yl)-1H-pyrrole-2,5-dicarboxylic-acid	3	DB06955	-7.84789	0.08694	6.13625	454.269	5.97239	520	4431	1009	722	1138.24	989	1324.74	1284	NA	staP
Pergolide	0	DB01186	-6.75226	0.37694	6.06965	314.498	5.97232	1828	2972	1166	723	1462.9	1519	1850.3	2098	Pergolide is a long-acting dopamine agonist approved in 1982 for the treatment of Parkinson鈥檚 Disease. It is an ergot derivative that acts on the dopamine D2 and D3, alpha2- and alpha1-adrenergic, and 5-hydroxytryptamine (5-HT) receptors. It was indicated as adjunct therapy with levodopa/carbidopa in the symptomatic treatment of parkinsonian syndrome. It was later found that pergolide increased t…	ADRA2C,DRD5,DRD1,HTR1B,HTR2C,ADRA1A,ADRA1B,ADRA1D,DRD2,DRD3,DRD4,HTR1A,HTR2B,HTR2A,HTR1D,ADRA2B,ADRA2A
Zopiclone	1	DB01198	-7.0976	0.6975	6.42869	388.815	5.97224	1302	801	548	724	802.03	521	829.866	637	Zopiclone is a novel hypnotic agent used in the treatment of insomnia. Its mechanism of action is based on modulating benzodiazepine receptors. In addition to zopiclone's benzodiazepine pharmacological properties it also has some barbiturate like properties.	GABRA1,GABRA2,GABRA3,GABRA5,TSPO
(5-BROMO-4-CHLORO-3-INDOLYL)-A-D-MANNOSE	0	DB04806	-7.74374	0.85282	5.79982	408.632	5.97201	614	189	1690	725	614.064	309	580.995	365	NA	NA
PF-00356231	7	DB03367	-7.15333	0.36639	5.95183	428.513	5.97136	1232	3061	1405	726	1400.46	1404	1743.35	1906	NA	MMP12
Domperidone	4	DB01184	-7.76527	0.51528	6.91771	425.92	5.97113	596	1975	113	727	557.643	256	510.463	288	A specific blocker of dopamine receptors. It speeds gastrointestinal peristalsis, causes prolactin release, and is used as antiemetic and tool in the study of dopaminergic mechanisms.	DRD2,DRD3
5,10-Methylene-6-Hydrofolic-Acid	7	DB02301	-6.87524	0.46312	6.06244	455.431	5.97107	1646	2370	1185	728	1354.43	1317	1665.84	1799	NA	thyA,fgs,thyA
5-(DIMETHYLAMINO)-2-NAPHTHALENESULFONIC-ACID	2	DB07684	-5.97626	0.32665	4.62126	251.307	5.9707	2784	3339	3287	729	2172.47	2735	3126.28	3890	NA	PLAT
1-METHYL-5-(2-PHENOXYMETHYL-PYRROLIDINE-1-SULFONYL)-1H-INDOLE-2,3-DIONE	1	DB08213	-7.47089	0.29597	6.09415	400.456	5.96982	862	3528	1106	730	1251.78	1160	1498.29	1535	NA	CASP3
3-({5-Benzyl-6-Hydroxy-2,4-Bis-(4-Hydroxy-Benzyl)-3-Oxo-[1,2,4]-Triazepane-1-Sulfonyl)-Benzonitrile	3	DB03141	-7.99239	0.13832	6.51443	598.681	5.9673	429	4296	439	731	876.952	602	931.813	776	NA	gag-pol,ORF
Drotebanol	2	DB01547	-7.84096	0.27055	5.09829	333.428	5.96446	526	3685	2814	732	1413.56	1429	1760.28	1938	NA	NA
Adinazolam	1	DB00546	-7.37562	0.58616	6.33563	351.841	5.96315	968	1477	672	733	916.078	645	986.753	832	Adinazolam (Deracyn庐) is a benzodiazepine derivative with anxiolytic, anticonvulsant, sedative, and antidepressant properties. Adinazolam was first developed to enhance the antidepressant effects of [alprazolam]. It has never been approved by the FDA for clinical use.	GABRB3,GABRD,GABRE,GABRP,GABRR1,GABRR2,GABRR3,GABRA1,GABRA2,GABRA3,GABRA5,GABRG1,GABRG2,GABRG3,GABRB1,GABRB2
Telmisartan	0	DB00966	-9.11639	0.10925	6.73481	514.629	5.96312	54	4385	215	734	439.668	164	370.624	167	Telmisartan is an angiotensin II receptor antagonist (ARB) used in the management of hypertension. Generally, angiotensin II receptor blockers (ARBs) such as telmisartan bind to the angiotensin II type 1 (AT1) receptors with high affinity, causing inhibition of the action of angiotensin II on vascular smooth muscle, ultimately leading to a reduction in arterial blood pressure. Recent studies sugg…	AGTR1,PPARG
Mercaptopurine	0	DB01033	-4.41169	0.93283	4.5543	152.182	5.96231	3946	41	3350	735	794.453	515	815.321	615	An antimetabolite antineoplastic agent with immunosuppressant properties. It interferes with nucleic acid synthesis by inhibiting purine metabolism and is used, usually in combination with other drugs, in the treatment of or in remission maintenance programs for leukemia. [PubChem]	HPRT1
Iodo-Willardiine	1	DB02818	-5.60494	0.73703	5.13244	325.062	5.96221	3128	597	2768	736	1396.6	1389	1729.03	1888	NA	GRIA2
Para-Isopropylaniline	6	DB02114	-4.46818	0.56528	3.97995	135.21	5.96207	3911	1628	3824	737	2058.17	2544	2898.37	3611	NA	CELA1
Methimazole	0	DB00763	-3.08187	0.8652	3.76754	114.173	5.95968	4378	161	3958	738	1197.87	1071	1407.75	1401	A thioureylene antithyroid agent that inhibits the formation of thyroid hormones by interfering with the incorporation of iodine into tyrosyl residues of thyroglobulin. This is done by interfering with the oxidation of iodide ion and iodotyrosyl groups through inhibition of the peroxidase enzyme.	TPO
Azelastine	0	DB00972	-7.64907	0.4348	6.37077	381.907	5.95961	706	2573	628	739	958.213	701	1044.88	898	Azelastine, a phthalazine derivative, is an antihistamine and mast cell stabilizer available as a nasal spray for hay fever and as eye drops for allergic conjunctivitis. Azelastine is also available as a combination product of azelastine hydrochloride and fluticasone propionate called Dymista鈩? Dymista鈩?is indicated in patient over 12 years old for symptomatic relief of seasonal allergic rhinitis.	HRH1
Malonaldehyde	0	DB03057	-2.44288	0.77207	2.81539	72.063	5.95886	4460	426	4462	740	1582.62	1729	2039.03	2367	The dialdehyde of malonic acid. [PubChem]	bla
5-(2-PHENYLPYRAZOLO[1,5-A]PYRIDIN-3-YL)-1H-PYRAZOLO[3,4-C]PYRIDAZIN-3-AMINE	0	DB07794	-8.09138	0.65031	6.55287	327.351	5.95786	368	1059	391	741	579.675	277	534.122	308	NA	MAPK1
(3R,4S)-1-[(4-amino-5H-pyrrolo[3,2-d]pyrimidin-7-yl)methyl]-4-[(benzylsulfanyl)methyl]pyrrolidin-3-ol	1	DB07649	-7.08341	0.67568	6.39645	369.494	5.95781	1321	917	587	742	852.273	574	892.559	714	NA	mtnN
5-(2-fluorophenyl)-N-(pyridin-4-ylmethyl)pyrazolo[1,5-a]pyrimidin-7-amine	8	DB08534	-6.21693	0.21245	5.96329	319.343	5.95769	2509	3981	1382	743	1789.56	2087	2398.83	2925	NA	CDK2
6-{4-[4-(4-CHLOROPHENYL)PIPERIDIN-4-YL]PHENYL}-9H-PURINE	9	DB07856	-7.44595	0.32874	6.70195	389.89	5.95767	897	3327	245	744	858.808	584	900.887	727	NA	PRKACA,PKIA
4-(2-aminoethoxy)-N-(3-chloro-2-ethoxy-5-piperidin-1-ylphenyl)-3,5-dimethylbenzamide	7	DB07626	-6.52204	0.19913	6.21729	445.991	5.95729	2136	4049	850	745	1529.79	1637	1944.42	2241	NA	PLAU
2-Iminiopropanoate	2	DB04212	-2.80961	0.65957	3.33106	87.078	5.95685	4415	1008	4246	746	1937.66	2341	2663.53	3317	NA	acdS
1-(3-BROMOPHENYL)-7-CHLORO-6-METHOXY-3,4-DIHYDROISOQUINOLINE	6	DB08555	-6.39509	0.58277	5.95588	350.643	5.95676	2286	1503	1400	747	1376.8	1361	1688.06	1829	1-(3-bromophenyl)-7-chloro-6-methoxy-3,4-dihydroisoquinoline is a solid. This compound belongs to the isoquinolines and derivatives. These are aromatic polycyclic compounds containing an isoquinoline moiety, which consists of a benzene ring fused to a pyridine ring and forming benzo[c]pyridine. This medication is known to target mitogen-activated protein kinase 10.	MAPK10
1-(3-HYDROXYPROPYL)-2-[(3-NITROBENZOYL)AMINO]-1H-BENZIMIDAZOL-5-YL-PIVALATE	2	DB08590	-6.79837	0.27868	6.10775	440.456	5.95648	1767	3630	1071	748	1505.6	1591	1900.98	2161	NA	IRAK4
Hydrocortamate	1	DB00769	-8.33325	0.35354	6.46003	475.626	5.95641	257	3161	506	749	744.899	458	743.537	534	Hydrocortamate is a synthetic glucocorticoid used for its anti-inflammatory or immunosuppressive properties to treat inflammation due to corticosteroid-responsive dermatoses. Glucocorticoids are a class of steroid hormones characterised by an ability to bind with the cortisol receptor and trigger a variety of important cardiovascular, metabolic, immunologic and homeostatic effects.	NR3C1
Vinylsulphonic-Acid	3	DB04359	-2.75987	0.68552	3.32	108.118	5.95631	4425	873	4253	750	1873.57	2232	2542.19	3139	NA	phnX
CP-271485	0	DB02118	-7.64259	0.58953	5.66042	372.446	5.95622	713	1447	1966	751	1110.95	956	1265.84	1195	NA	MMP12
Meticillin	0	DB01603	-7.28468	0.55022	6.02453	380.422	5.95618	1065	1741	1248	752	1148.54	1003	1322.68	1282	One of the penicillins which is resistant to penicillinase but susceptible to a penicillin-binding protein. It is inactivated by gastric acid so administered by injection.	mecA,pbp2a,pbp1b,penA,pbp3,pbpA
4-[5-(3-IODO-PHENYL)-2-(4-METHANESULFINYL-PHENYL)-1H-IMIDAZOL-4-YL]-PYRIDINE	2	DB07607	-7.27295	0.50582	6.51507	485.35	5.9561	1082	2049	435	753	923.131	658	987.991	834	NA	MAPK14
1-{5-[2-(thieno[3,2-d]pyrimidin-4-ylamino)ethyl]-1,3-thiazol-2-yl}-3-[3-(trifluoromethyl)phenyl]urea	0	DB07360	-7.38478	0.15276	6.58686	464.498	5.95609	953	4244	348	754	1014.97	786	1120.68	980	NA	AURKA
8-(2-Chloro-3,4,5-Trimethoxy-Benzyl)-9-Pent-4-Ylnyl-9h-Purin-6-Ylamine	0	DB04505	-6.70486	0.16252	6.46125	415.881	5.95567	1897	4199	505	755	1320.12	1266	1590.38	1693	NA	HSP90AA1
Toluene	4	DB11558	-3.75529	0.6544	3.14261	92.141	5.9556	4212	1035	4345	756	1945.29	2357	2665.67	3321	Toluene is a colorless, liquid that is immiscible in water. It is a mono-substituted benzene derivative used in veterinary medicine as a treatment for various parasites in dogs and cats.	NA
5-ALPHA-PREGNANE-3-BETA-OL-HEMISUCCINATE	0	DB08510	-8.67519	0.40759	6.52381	418.574	5.95538	144	2770	421	757	597.111	290	551.707	329	NA	IGHG2
Mexiletine	4	DB00379	-4.92741	0.45549	4.45574	179.263	5.95461	3628	2421	3444	758	2188.26	2763	3115.84	3880	Antiarrhythmic agent pharmacologically similar to lidocaine. It may have some anticonvulsant properties.	SCN5A,AHR
1-((1R,2S)-1-{2-[2-(4-CHLOROPHENYL)-1,3-BENZOXAZOL-7-YL]ETHYL}-2-HYDROXYPROPYL)-1H-IMIDAZOLE-4-CARBOXAMIDE	3	DB07786	-7.77285	0.61666	6.79476	424.888	5.95435	590	1257	179	759	563.405	261	510.129	287	NA	ADA
Alfacalcidol	3	DB01436	-8.03941	0.36994	6.52643	400.647	5.95396	402	3027	417	760	788.038	505	797.612	593	Alfacalcidol is an active metabolite of Vitamin D, which performs important functions in regulation of the calcium balance and the bone metabolism. Alfacalcidol is Vitamin D-hormone analog which is activated by the enzyme 25-hydroxylase in the liver for systemic and in osteoblasts for local D-hormone actions. It possesses a unique pattern of pleiotropic effects on, e.g. gut, bone, pararthyroids, …	VDR,CYP27B1
Balanol-Analog-1	1	DB02611	-7.7822	0.31325	5.43526	370.405	5.95396	578	3425	2342	761	1370.53	1349	1667.47	1802	NA	PRKACA
Enalapril	0	DB00584	-6.44229	0.10302	5.26403	376.453	5.95348	2227	4396	2602	762	2098.99	2610	2942.35	3662	"Enalapril is a prodrug belonging to the angiotensin-converting enzyme (ACE) inhibitor drug class that works on the renin-angiotensin-aldosterone system, which is responsible for the regulation of blood pressure and fluid and electrolyte homeostasis. Enalapril is an orally-active and long-acting nonsulphydryl antihypertensive agent that suppresses the renin-angiotensin-aldosterone system to lower…	ACE
Liothyronine	3	DB00279	-6.39993	0.36108	6.44625	650.976	5.95307	2280	3105	523	763	1296.45	1233	1547.03	1627	Liothyronine is a thyroidal hormone T3 which is normally produced by the thyroid gland in a ratio 4:1 when compared with T4: T3. Liothyronine is the active form of thyroxine which is composed in a basic chemical structure by a tyrosine with bound iodine.[T457] The exogenous liothyronine product was developed by King Pharmaceuticals and FDA approved in 1956.[L5578]	THRA,THRB
2-{2-[(3,5-dimethylphenyl)amino]pyrimidin-4-yl}-N-[(1S)-2-hydroxy-1-methylethyl]-4-methyl-1,3-thiazole-5-carboxamide	3	DB07194	-6.95761	0.49609	6.61766	397.504	5.95278	1525	2123	325	764	946.889	686	1017.11	876	NA	SYK
PROGESTERONE-11-ALPHA-OL-HEMISUCCINATE	1	DB08547	-8.66968	0.71358	6.62938	430.541	5.95264	145	717	309	765	395.938	134	317.894	127	NA	IGHG2
4-{[(2,6-dichlorophenyl)carbonyl]amino}-N-piperidin-4-yl-1H-pyrazole-3-carboxamide	2	DB08142	-7.26906	0.70077	6.42634	382.251	5.9524	1094	779	553	766	775.135	487	778.204	566	AT7519 is a selective inhibitor of certain Cyclin Dependent Kinases (CDKs) leading to tumour regression. It is developed by Astex for the treatment of solid tumours and haematological malignancies.	CDK2
Acrylic-Acid	7	DB02579	-2.29301	0.75603	2.98811	72.063	5.95221	4474	499	4404	767	1657.14	1868	2142.3	2554	A 伪,尾-unsaturated monocarboxylic acid that is ethene substituted by a carboxy group.	bla
Z-Dehydrobutyrine	0	DB03720	-3.71292	0.54823	2.89628	101.105	5.95201	4223	1754	4440	768	2241.81	2841	3203.89	3969	NA	NA
Quazepam	4	DB01589	-7.02322	0.58095	6.38353	386.801	5.95144	1420	1514	611	769	1002.53	774	1095.18	951	Quazepam is a drug which is a benzodiazepine derivative. It induces impairment of motor function and has hypnotic properties. Quazepam is used to treat insomnia.	GABRD,GABRE,GABRP,GABRR1,GABRR2,GABRR3,GABRA1,GABRA2,GABRA3,GABRA5,GABRG1,GABRG2,GABRG3,GABRB1,GABRB3
Ethyl-Trimethyl-Silane	0	DB02265	-2.44493	0.65557	3.59055	102.253	5.95086	4459	1028	4083	770	1948.39	2361	2655.03	3301	NA	tetX
2,2'-{[9-(HYDROXYIMINO)-9H-FLUORENE-2,7-DIYL]BIS(OXY)}DIACETIC-ACID	4	DB07034	-7.41088	0.42848	5.20851	343.291	5.94977	930	2627	2679	771	1498.8	1580	1870.56	2124	NA	CHEK1
[2'-HYDROXY-3'-(1H-PYRROLO[3,2-C]PYRIDIN-2-YL)-BIPHENYL-3-YLMETHYL]-UREA	0	DB07247	-8.49592	0.63518	6.28067	358.401	5.94966	201	1146	763	772	606.919	299	560.147	336	NA	F7,F3
[1-(6-{6-[(1-methylethyl)amino]-1H-indazol-1-yl}pyrazin-2-yl)-1H-pyrrol-3-yl]acetic-acid	1	DB07546	-7.24006	0.75685	6.56616	376.42	5.94813	1126	496	378	773	635.584	338	595.439	380	NA	CSNK2A2
(3R)-3-cyclopentyl-7-[(4-methylpiperazin-1-yl)sulfonyl]-3,4-dihydro-2H-1,2-benzothiazine-1,1-dioxide	0	DB08304	-8.02922	0.54595	6.20494	413.565	5.94715	409	1771	875	774	836.898	558	858.981	674	NA	GRIA2
1,1,1,3,3,3-HEXAFLUORO-2-{4-[(2,2,2-TRIFLUOROETHYL)AMINO]PHENYL}PROPAN-2-OL	0	DB07082	-6.92816	0.74275	5.54326	341.173	5.94543	1571	564	2168	775	1104.6	943	1243.1	1158	NA	NR1H2
N-[(2-AMINO-6-METHYLPYRIMIDIN-4-YL)METHYL]-3-{[(E)-(2-OXODIHYDROFURAN-3(2H)-YLIDENE)METHYL]AMINO}BENZENESULFONAMIDE	0	DB07325	-7.73311	0.7832	6.19553	389.437	5.94533	628	389	894	776	641.619	343	602.211	387	NA	HSP90AA1
Indinavir	4	DB00224	-7.60656	0.05157	6.19458	613.803	5.94515	743	4481	897	777	1234.22	1130	1440.08	1449	A potent and specific HIV protease inhibitor that appears to have good oral bioavailability. [PubChem]	HIV-1-protease
(METHYLPYRIDAZINE-PIPERIDINE-ETHYLOXYPHENYL)ETHYLACETATE	4	DB08012	-6.47961	0.25059	5.99351	369.465	5.94298	2186	3797	1319	778	1708.36	1951	2220.47	2677	NA	Not-Available,Not-Available
3-CHLORO-2-(4-HYDROXYPHENYL)-2H-INDAZOL-5-OL	2	DB07708	-7.0475	0.81184	5.60658	260.68	5.94261	1386	296	2063	779	901.1	631	945.913	788	NA	ESR1,NCOA2
4-[(1S,2S,5S)-5-(HYDROXYMETHYL)-6,8,9-TRIMETHYL-3-OXABICYCLO[3	2	DB07195	-8.46467	0.74349	5.77829	288.387	5.94213	213	558	1735	780	633.289	334	590.796	375	NA	ESR1,NCOA2
7-amino-2-tert-butyl-4-(4-pyrimidin-2-ylpiperazin-1-yl)pyrido[2,3-d]pyrimidine-6-carboxamide	4	DB07043	-6.78293	0.3676	6.37003	407.482	5.94193	1781	3054	629	781	1278.52	1204	1506.82	1557	NA	ligA
(Z)-3-BENZYL-5-(2-HYDROXY-3-NITROBENZYLIDENE)-2-THIOXOTHIAZOLIDIN-4-ONE	1	DB07838	-7.07066	0.74687	6.31239	372.427	5.94175	1342	537	709	782	795.051	517	799.449	594	NA	NMT2
6-CYCLOHEXYLMETHYLOXY-2-(4'-HYDROXYANILINO)PURINE	6	DB08233	-6.80561	0.61644	6.66588	339.399	5.94125	1752	1258	273	783	828.485	547	844.227	652	NA	CCNA2,CDK2
5-Bromothienyldeoxyuridine	0	DB03804	-7.04249	0.79877	6.08025	389.227	5.93922	1391	338	1142	784	805.483	524	812.774	611	NA	TK
CRA_10991	0	DB01771	-7.58178	0.27946	6.06082	369.852	5.93904	763	3623	1187	785	1266.86	1192	1485.99	1515	NA	PRSS1
Tetrahydropyran	1	DB02412	-3.16924	0.74214	3.19379	86.134	5.93891	4358	567	4330	786	1702.92	1945	2203.53	2645	NA	NA
N-[2-(1,3-BENZODIOXOL-5-YL)ETHYL]-1-[2-(1H-IMIDAZOL-1-YL)-6-METHYLPYRIMIDIN-4-YL]-D-PROLINAMIDE	1	DB06916	-7.20595	0.3879	6.33835	420.473	5.93867	1166	2905	667	787	1154.75	1011	1312.17	1269	NA	NOS2
Penicillin-V	1	DB00417	-6.61303	0.66927	5.688	350.396	5.9378	2017	956	1914	788	1305.89	1253	1545.38	1623	Phenoxymethylpenicillin is a narrow spectrum antibiotic also commonly referred to as Penicillin V or Penicillin VK.[A178609] It is a phenoxymethyl analog of Penicillin G, or [benzylpenicillin]. An orally active naturally penicillin, phenoxymethylpenicillin is used to treat mild to moderate infections in the respiratory tract, skin, and soft tissues caused by penicillin G颅-sensitive microorganisms…	pbpA,mecA,dacB,Not-Available
Ouabain	2	DB01092	-11.6684	0.53825	5.94102	584.659	5.93656	1	1818	1429	789	212.778	42	137.47	33	A cardioactive glycoside consisting of rhamnose and ouabagenin, obtained from the seeds of Strophanthus gratus and other plants of the Apocynaceae; used like digitalis. It is commonly used in cell biological studies as an inhibitor of the NA(+)-K(+)-exchanging ATPase.	ATP1A1
Quinapril	2	DB00881	-6.65444	0.26603	5.86077	438.524	5.93577	1965	3716	1571	790	1735.04	1993	2255.3	2728	Quinapril is a prodrug that belongs to the angiotensin-converting enzyme (ACE) inhibitor class of medications. It is metabolized to quinaprilat (quinapril diacid) following oral administration. Quinaprilat is a competitive inhibitor of ACE, the enzyme responsible for the conversion of angiotensin I (ATI) to angiotensin II (ATII). ATII regulates blood pressure and is a key component of the renin-a…	ACE
Simvastatin	5	DB00641	-7.27176	0.63653	6.82668	418.574	5.93557	1087	1128	154	791	621.669	318	573.702	350	Simvastatin is a lipid-lowering agent that is derived synthetically from the fermentation of Aspergillus terreus. It is a potent competitive inhibitor of 3-hydroxy-3-methylglutaryl coenzyme A reductase (hydroxymethylglutaryl COA reductases), which is the rate-limiting enzyme in cholesterol biosynthesis. It may also interfere with steroid hormone production. Due to the induction of hepatic LDL rec…	HMGCR,ITGB2
2-{5-[3-(7-PROPYL-3-TRIFLUOROMETHYLBENZO[D]ISOXAZOL-6-YLOXY)PROPOXY]INDOL-1-YL}ETHANOIC-ACID	0	DB07053	-6.94825	0.51529	6.78411	476.451	5.93507	1545	1974	185	792	817.604	537	826.322	632	NA	PPARG
BENZYL-N-({(2S,3S)-3-[(PROPYLAMINO)CARBONYL]OXIRAN-2-YL}CARBONYL)-L-ISOLEUCYL-L-PROLINATE	0	DB07219	-7.0626	0.29522	5.95498	473.57	5.93391	1356	3533	1401	793	1518.9	1614	1886.31	2141	NA	CTSB
Beta-Hydroxyleucine	6	DB02978	-4.04606	0.60816	3.71325	147.174	5.93223	4114	1315	3982	794	2033.66	2503	2782.47	3481	NA	NA
Phytonadione	1	DB01022	-6.85286	0.41031	7.01379	450.707	5.93188	1678	2758	63	795	693.863	390	663.095	450	Phylloquinone is often called vitamin K1. Phylloquinone is fat soluble and stable in air and moisture. However, it degrades in sunlight. It is found naturally in a wide variety of green plants. Phylloquinone is also an antidote for coumatetralyl. Vitamin K is needed for the posttranslational modification of certain proteins, mostly required for blood coagulation.	GGCX,BGLAP
OLOMOUCINE-II	2	DB04662	-6.80192	0.28867	6.24169	370.457	5.93072	1759	3577	816	796	1421.83	1440	1725.14	1880	NA	CDK2
Voriconazole	2	DB00582	-6.49744	0.39846	6.52267	349.316	5.93067	2164	2838	427	797	1202.37	1075	1379.01	1352	Voriconazole (Vfend, Pfizer) is a triazole antifungal medication used to treat serious fungal infections. It is used to treat invasive fungal infections that are generally seen in patients who are immunocompromised. These include invasive candidiasis, invasive aspergillosis, and emerging fungal infections.	ERG11
6-Carboxymethyluracil	1	DB03048	-4.74181	0.74937	3.83662	170.124	5.93064	3749	526	3919	798	1575.87	1717	1977.09	2283	NA	DPYD
Tadalafil	0	DB00820	-8.29908	0.32513	6.23693	389.411	5.92937	269	3351	827	799	878.506	605	906.729	740	Tadalafil is an orally administered drug used to treat male erectile dysfunction (impotence). It is marketed worldwide under the brand name Cialis. It is a phosphodiesterase 5 (PDE5) inhibitor. Tadalafil's distinguishing pharmacologic feature is its longer half-life (17.5 hours) compared with Viagra and Levitra (4-5 hours). This longer half-life results in a longer duration of action and is, in p…	PDE5A,PDE11A
17-METHYL-17-ALPHA-DIHYDROEQUILENIN	0	DB06871	-8.71178	0.36384	5.51229	282.383	5.92908	132	3085	2220	800	922.185	657	966.928	807	NA	ESR1,NCOA2
Laevulinic-Acid	1	DB02239	-3.55561	0.42354	3.29315	116.116	5.92861	4270	2665	4269	801	2497.59	3247	3648.8	4352	NA	ALAD
Methylmalonic-Acid	9	DB04183	-3.46861	0.50677	2.91993	118.088	5.92841	4294	2037	4432	802	2361.33	3039	3384.42	4142	A malonic acid derivative which is a vital intermediate in the metabolism of fat and protein. Abnormalities in methylmalonic acid metabolism lead to methylmalonic aciduria. This metabolic disease is attributed to a block in the enzymatic conversion of methylmalonyl CoA to succinyl CoA. [PubChem]	Not-Available
N-cyclopropyl-3-{[1-(2,4-difluorophenyl)-7-methyl-6-oxo-6,7-dihydro-1H-pyrazolo[3,4-b]pyridin-4-yl]amino}-4-methylbenzamide	1	DB08349	-8.15478	0.46955	6.95917	449.461	5.92597	330	2321	88	803	482.333	190	406.965	199	NA	MAPK14
Estramustine	1	DB01196	-7.89213	0.2102	6.43442	440.411	5.92588	497	3991	542	804	964.214	713	1024.42	881	A nitrogen mustard linked to estradiol, usually as phosphate; used to treat prostatic neoplasms; also has radiation protective properties.	MAP2,MAP1A,ESR1,ESR2
2-(6-CHLORO-3-{[2,2-DIFLUORO-2-(1-OXIDO-2-PYRIDINYL)ETHYL]AMINO}-2-OXO-1(2H)-PYRAZINYL)-N-[(2-FLUOROPHENYL)METHYL]ACETAMIDE	3	DB07550	-6.94109	0.36439	6.61988	467.835	5.92587	1553	3078	321	805	1054.23	858	1153.4	1022	NA	F2
4-Imino-5-Methidyl-2-Methylpyrimidine	0	DB01788	-4.55832	0.81414	3.88737	121.143	5.92447	3860	287	3888	806	1365	1334	1627.04	1755	NA	thiE
2-[2-(2-Hydroxy-Ethoxy)-Ethoxy]-Ethanol	4	DB02327	-3.39509	0.59799	3.31161	150.174	5.92386	4311	1393	4261	807	2131.71	2668	2946.77	3667	NA	budB,ganB,serC
Cetirizine	0	DB00341	-6.83282	0.59945	5.69003	388.895	5.92382	1708	1385	1908	808	1381.92	1371	1652.62	1786	"Cetirizine, also commonly known as _Zyrtec_, is an orally active second-generation histamine H1 antagonist proven effective in the treatment of various allergic symptoms, such as sneezing, coughing, nasal congestion, hives, and other symptoms [A175051], [A175054].	HRH1
P-Cresol	0	DB01688	-4.38851	0.62318	3.324	108.14	5.9238	3956	1223	4251	809	2019.67	2482	2739.84	3429	NA	cobT
(3AS,4R,9BR)-4-(4-HYDROXYPHENYL)-1,2,3,3A,4,9B-HEXAHYDROCYCLOPENTA[C]CHROMEN-9-OL	0	DB08737	-8.06175	0.60871	6.04393	282.339	5.92344	394	1312	1210	810	843.675	563	855.208	668	NA	ESR1
(2Z)-5'-BROMO-2,3'-BIINDOLE-2',3(1H,1'H)-DIONE-AMMONIATE	0	DB07493	-8.03918	0.66945	5.77691	341.164	5.92293	403	954	1739	811	858.111	580	874.415	692	NA	CDK2
N-Butyl-Isocyanide	5	DB01826	-2.46968	0.80322	3.65871	83.134	5.92281	4457	318	4022	812	1466.79	1526	1786.37	1985	NA	camC,Not-Available,glbN,MB
Cefprozil	0	DB01150	-7.44543	0.29647	5.5711	389.433	5.9225	899	3525	2115	813	1527.85	1632	1885.43	2139	Cefprozil is a cephalosporin antibiotic that is commonly employed to treat a variety of bacterial infections, including those of the ear and skin, bronchitis, and others.	ponA,pbpX,penA
4-(2-AMINOETHYL)BENZENESULFONAMIDE	0	DB08782	-5.58512	0.63016	4.56041	200.263	5.92196	3150	1177	3347	814	1782.76	2070	2315.16	2807	NA	CA2
Phenelzine	4	DB00780	-4.45814	0.57914	4.10859	136.198	5.92176	3918	1523	3732	815	2064.03	2549	2813.42	3515	Phenelzine, with the formula 尾-phenylethylhydrazine, is a monoamine oxidase inhibiting antidepressant that is effective in the treatment of panic disorder and social anxiety disorder.[A15753] It was developed by Parke Davis and originally FDA approved on June 9th, 1961. It is currently approved under prescription by the name of Nardil.	MAOA,MAOB,AOC3,ABAT,GPT,GPT2,GAD65
Acetoacetic-Acid	0	DB01762	-3.62382	0.73971	2.80526	102.089	5.9215	4255	583	4464	816	1733.79	1991	2228.94	2686	NA	FAH
2,5-bis-o-{3-[amino(imino)methyl]phenyl}-1,4:3,6-dianhydro-d-glucitol	4	DB04790	-7.19859	0.47474	5.34992	382.42	5.92128	1174	2288	2469	817	1525.69	1626	1878.81	2134	NA	PRSS1
4-Aminohydrocinnamic-Acid	4	DB03210	-4.83562	0.42956	3.99098	165.192	5.92096	3689	2613	3816	818	2342.08	3003	3325.72	4086	NA	tyrB
Carboxymethylthio-3-(3-Chlorophenyl)-1,2,4-Oxadiazol	2	DB03928	-5.96576	0.73571	5.14286	270.697	5.92053	2797	603	2757	819	1396.96	1390	1669.1	1805	NA	CTH
6-[BIS(2,2,2-TRIFLUOROETHYL)AMINO]-4-(TRIFLUOROMETHYL)QUINOLIN-2(1H)-ONE	3	DB08089	-7.29187	0.47503	6.18172	392.221	5.92032	1052	2287	930	820	1163.84	1029	1307.94	1261	An androgen receptor modulator.	AR
N-[(1S)-1-{1-[(1R,3E)-1-ACETYLPENT-3-EN-1-YL]-1H-1,2,3-TRIAZOL-4-YL}-1,2-DIMETHYLPROPYL]BENZAMIDE	0	DB07878	-6.98436	0.29779	6.14338	368.481	5.92014	1483	3518	996	821	1437.18	1464	1732.07	1894	NA	CTSS
Hypophosphite	7	DB04053	-1.44815	0.61886	2.58963	62.972	5.9197	4494	1242	4490	822	2130.43	2667	2926.4	3642	NA	rhdA
Dicloxacillin	0	DB00485	-8.31896	0.26709	6.47099	470.334	5.9194	261	3709	492	823	791.253	507	780.946	571	One of the penicillins which is resistant to penicillinase.	LMHCC_2184,LMHCC_2773,pbp1b,pbp2a,pbp3,pbpA,penA
Ephedrine	0	DB01364	-5.12229	0.38058	3.63017	165.236	5.91934	3497	2950	4048	824	2421.98	3135	3469.39	4220	An alpha- and beta-adrenergic agonist that may also enhance release of norepinephrine. It has been used in the treatment of several disorders including asthma, heart failure, rhinitis, and urinary incontinence, and for its central nervous system stimulatory effects in the treatment of narcolepsy and depression. It has become less extensively used with the advent of more selective agonists.	SLC6A2,ADRA1A,SLC18A2,ACHE
3,5-Difluorobenzenesulfonamide	2	DB02087	-5.14241	0.86506	4.56688	193.174	5.9193	3484	162	3341	825	1116.81	960	1235.44	1142	NA	CA2
N-(6,7,9,10,17,18,20,21-octahydrodibenzo[b,k][1,4,7,10,13,16]hexaoxacyclooctadecin-2-yl)acetamide	3	DB07084	-7.10886	0.30823	5.47878	417.458	5.91848	1288	3452	2270	826	1699.21	1940	2161.08	2586	NA	ompF
3-Chloroalaninate	0	DB01735	-3.06153	0.622	3.5087	123.539	5.91837	4380	1231	4136	827	2072.31	2566	2814.74	3519	NA	acdS
5'-S-[2-(decylamino)ethyl]-5'-thioadenosine	0	DB07413	-6.11532	0.5176	5.68042	466.652	5.91832	2622	1959	1928	828	1692.2	1924	2147.46	2561	NA	mmaA4
N1-(1-Dimethylcarbamoyl-2-Phenyl-Ethyl)-2-Oxo-N4-(2-Pyridin-2-Yl-Ethyl)-Succinamide	2	DB02140	-6.45305	0.5218	6.037	410.474	5.91799	2213	1920	1220	829	1439.79	1470	1730.67	1890	NA	CTSH
2,4-Dihydroxy-3,3-Dimethyl-Butyrate	0	DB01930	-4.24033	0.57068	3.44263	147.15	5.91743	4026	1593	4186	830	2172.66	2737	2994.31	3736	NA	panC
Orotic-Acid	0	DB02262	-4.90122	0.61351	3.60623	156.097	5.91621	3642	1275	4069	831	1990.6	2433	2663.46	3316	NA	pyrDA,pyrE,DHODH,pyrD,pyrC
Daunorubicin	3	DB00694	-9.15395	0.55032	6.14411	527.526	5.91557	48	1740	994	832	512.655	216	436.24	222	A very toxic anthracycline aminoglycoside antineoplastic isolated from Streptomyces peucetius and others, used in treatment of leukemia and other neoplasms.	Not-Available,TOP2A,TOP2B
Amantadine	2	DB00915	-5.68344	0.4229	4.42647	151.253	5.91533	3057	2671	3465	833	2203.33	2783	3047.13	3794	An antiviral that is used in the prophylactic or symptomatic treatment of influenza A. It is also used as an antiparkinsonian agent, to treat extrapyramidal reactions, and for postherpetic neuralgia. The mechanisms of its effects in movement disorders are not well understood but probably reflect an increase in synthesis and release of dopamine, with perhaps some inhibition of dopamine uptake.	M,GRIN3A,DRD2
6-[(5-CHLORO-3-METHYL-1-BENZOFURAN-2-YL)SULFONYL]PYRIDAZIN-3(2H)-ONE	2	DB07187	-6.75421	0.59647	5.88548	324.745	5.91438	1825	1402	1528	834	1343.77	1304	1575.35	1669	NA	AKR1B1
Cortisone-acetate	2	DB01380	-8.85284	0.77468	6.36399	402.487	5.91435	99	417	640	835	385.398	123	297.84	116	Cortisone acetate is a steroid hormone that has both glucocoriticoid and mineral corticoid activities. Corticosteroids are used to provide relief for inflamed areas of the body. They lessen swelling, redness, itching, and allergic reactions. They are often used as part of the treatment for a number of different diseases, such as severe allergies or skin problems, asthma, or arthritis. Endogenous …	NR3C1
Cefadroxil	0	DB01140	-7.44758	0.38288	5.44424	363.395	5.91434	892	2938	2324	836	1502.16	1585	1826.21	2056	Long-acting, broad-spectrum, water-soluble, cephalexin derivative.	pbp3,pbpA,pbp1b,penA
NAPHTHYLOXYACETIC-ACID	4	DB08286	-5.6385	0.65298	4.25603	202.209	5.9141	3092	1044	3633	837	1770.04	2053	2271.97	2757	NA	gag-pol,gag-pol
Mephentermine	0	DB01365	-4.74068	0.35507	4.19558	163.264	5.91399	3751	3147	3670	838	2454.64	3183	3512.12	4253	A sympathomimetic agent with mainly indirect effects on adrenergic receptors. It is used to maintain blood pressure in hypotensive states, for example, following spinal anesthesia. Although the central stimulant effects of mephentermine are much less than those of amphetamine, its use may lead to amphetamine-type dependence. (From Martindale, The Extra Pharmacopoeia, 30th ed, p1248)	ADRA1A
3-cyclopropyl-5-phenyl-N-(pyridin-3-ylmethyl)pyrazolo[1,5-a]pyrimidin-7-amine	5	DB08539	-6.59941	0.46123	6.62975	341.418	5.91313	2031	2381	308	839	1057.29	860	1142.02	1003	NA	CDK2
2-Oxobutanoic-Acid	7	DB04553	-2.96319	0.67203	3.16657	102.089	5.91312	4400	943	4336	840	1971.67	2404	2620.3	3247	NA	Not-Available,acdS
Pentanal	7	DB01919	-2.64126	0.82824	3.62418	86.134	5.91243	4435	248	4057	841	1391.83	1383	1646.33	1779	Pentanal is a solid. This compound belongs to the polyamines. These are compounds containing more than one amine group. This drug targets the protein cAMP-dependent protein kinase catalytic subunit alpha.	PRKACA
Morpholine-4-Carboxylic-Acid-[1-(2-Benzylsulfanyl-1-Formyl-Ethylcarbamoyl)-2-Phenyl-Ethyl]-Amide	1	DB03984	-6.18853	0.17147	5.64515	455.58	5.91226	2542	4158	2002	842	2054.51	2541	2765.93	3458	NA	CTSS
Diatrizoate	4	DB00271	-5.64478	0.1629	5.54432	613.915	5.91208	3089	4198	2166	843	2205.9	2786	3039.76	3789	A commonly used x-ray contrast medium. As diatrizoate meglumine and as Diatrizoate sodium, it is used for gastrointestinal studies, angiography, and urography.	NA
2-{3-[(2S)-4,4-difluoro-2-(pyrrolidin-1-ylcarbonyl)pyrrolidin-1-yl]-3-oxopropyl}-isoindole-1,3(2H)-dione	1	DB08739	-8.4039	0.5072	6.36231	405.401	5.91146	234	2031	641	844	712.085	414	672.865	466	NA	PREP
N-cyclopropyl-6-[(6,7-dimethoxyquinolin-4-yl)oxy]naphthalene-1-carboxamide	3	DB07274	-7.16079	0.20624	6.12065	414.461	5.91142	1224	4010	1045	845	1442.86	1476	1724.57	1876	NA	KDR
Lovastatin	6	DB00227	-6.93927	0.55238	6.61995	404.547	5.91132	1556	1715	320	846	921.931	655	948.727	791	Lovastatin is a hydroxymethylglutaryl coenzyme A (HMG-CoA) reductase inhibitor produced by _Aspergillus terreus_.[A174550] It is a polyketide-derived natural product that contains an oxidation susceptible heteroannular diene ring system.[T412] Lovastatin is a member of the family of the substituted hexahydronaphthalene lactones.[A174553] In the new set of FDA records, the first reported product w…	HMGCR,ITGAL,HDAC2
[(1S)-1-(5-CHLORO-1-BENZOTHIEN-3-YL)-2-(2-NAPHTHYLAMINO)-2-OXOETHYL]PHOSPHONIC-ACID	6	DB07680	-7.3135	0.18893	5.46778	431.837	5.91011	1036	4097	2287	847	1693.34	1925	2133.2	2533	NA	CMA1
4-bromo-2-{[(3R,5S)-3,5-dimethylpiperidin-1-yl]carbonyl}aniline	2	DB08579	-6.76446	0.40484	5.45228	311.223	5.91008	1810	2792	2315	848	1774.74	2056	2270.12	2753	NA	Not-Available
2-Methoxy-3-Isopropylpyrazine	4	DB01760	-3.92842	0.71105	4.35768	152.197	5.91005	4153	727	3537	849	1735.24	1994	2202.13	2642	NA	LCN9
1-BENZYL-4-[(5,6-DIMETHOXY-1-INDANON-2-YL)METHYL]PIPERIDINE	0	DB07701	-7.45961	0.53654	5.81844	379.5	5.90983	875	1828	1646	850	1223.09	1109	1380.82	1356	NA	ACHE
Isobutyric-Acid	8	DB02531	-3.01755	0.69744	2.96218	88.106	5.90899	4391	802	4415	851	1907.21	2291	2495.88	3057	NA	cumD
2-[5,6-BIS-(4-METHOXY-PHENYL)-FURO[2,3-D]PYRIMIDIN-4-YLAMINO]-ETHANOL	8	DB08392	-6.10716	0.46912	6.46744	391.427	5.90878	2632	2324	494	852	1266.7	1191	1445.72	1457	NA	CHEK1
Methylphenyl-carbinol	1	DB04784	-4.55017	0.62726	3.38333	122.167	5.90839	3870	1193	4227	853	2019.92	2483	2692.33	3360	NA	radh
Tolterodine	1	DB01036	-6.49336	0.36438	6.07809	325.496	5.90822	2170	3080	1152	854	1601.33	1763	1974.64	2280	Tolterodine is an antimuscarinic drug that is used to treat urinary incontinence. Tolterodine acts on M2 and M3 subtypes of muscarinic receptors.	CHRM3,CHRM2,CHRM5,CHRM1,CHRM4
Allyl-{6-[3-(4-Bromo-Phenyl)-Benzofuran-6-Yloxy]-Hexyl-}-Methyl-Amin	2	DB02339	-6.16823	0.75844	6.36541	442.397	5.90807	2564	485	635	855	906.463	634	924.296	765	NA	shc
N-Formylpiperidine	3	DB04113	-3.62857	0.60611	3.77385	113.16	5.90803	4254	1328	3955	856	2091.24	2596	2816.53	3521	NA	ADH1C
Butorphanol	2	DB00611	-8.9699	0.44369	5.63452	327.468	5.90778	70	2508	2022	857	742.672	455	708.058	499	A synthetic morphinan analgesic with narcotic antagonist action. It is used in the management of severe pain.	OPRK1,OPRD1,OPRM1
Calcidiol	3	DB00146	-8.12973	0.62177	6.84202	400.647	5.90777	351	1232	148	858	484.08	193	400	191	The major circulating metabolite of vitamin D3 (cholecalciferol). It is produced in the liver and is the best indicator of the body's vitamin D stores. It is effective in the treatment of rickets and osteomalacia, both in azotemic and non-azotemic patients. Calcifediol also has mineralizing properties.	VDR
Alpha-Aminoisobutyric-Acid	7	DB02952	-3.11949	0.70473	3.26287	103.121	5.90759	4367	756	4297	859	1868.38	2223	2420.79	2960	NA	CRH,NPY
4-(DIMETHYLAMINO)BENZOIC-ACID	5	DB08748	-4.60532	0.36465	3.62071	165.192	5.90731	3831	3077	4060	860	2532.89	3304	3630.68	4343	NA	rep,orf1ab
1-Methoxy-2-(2-Methoxyethoxy)Ethane	0	DB02935	-2.91769	0.68258	3.41347	134.175	5.90692	4404	885	4199	861	1937.47	2340	2538.9	3133	NA	HSP90B1
METHYL-N-({(2S,3S)-3-[(PROPYLAMINO)CARBONYL]OXIRAN-2-YL}CARBONYL)-L-ISOLEUCYL-L-PROLINATE	0	DB07223	-6.2851	0.38474	5.91801	397.472	5.90625	2429	2924	1471	862	1732.33	1988	2186.11	2619	NA	CTSB
N-Methyldehydrobutyrine	7	DB04225	-3.18532	0.61118	3.47577	115.132	5.90545	4353	1294	4168	863	2121.61	2650	2863.41	3577	NA	NA
(METHYLPYRIDAZINE-PIPERIDINE-PROPYLOXYPHENYL)ETHYLACETATE	0	DB08013	-6.79787	0.27156	6.16056	383.492	5.90517	1769	3681	963	864	1525.66	1625	1844.05	2083	NA	Not-Available,Not-Available
Clindamycin	0	DB01190	-7.00035	0.15443	5.30958	424.991	5.90481	1457	4235	2524	865	1915.82	2304	2497.28	3063	Clindamycin is a semisynthetic lincosamide antibiotic that has largely replaced lincomycin due to an improved side effect profile. Clindamycin inhibits bacterial protein synthesis by binding to bacterial 50S ribosomal subunits. It may be bacteriostatic or bactericidal depending on the organism and drug concentration.	rplJ,Not-Available
O-[2-(1,3-dioxo-1,3-dihydro-2H-isoindol-2-yl)ethyl]-(4-bromophenyl)thiocarbamate	0	DB08281	-6.97063	0.36243	5.75695	405.273	5.90343	1506	3097	1777	866	1636.79	1828	2023.72	2346	NA	gag-pol
Butenoic-Acid	5	DB02074	-2.78968	0.87348	3.20814	86.09	5.90217	4418	142	4323	867	1238.31	1134	1394.55	1385	NA	NA
Flucloxacillin	4	DB00301	-7.44356	0.33433	6.31691	453.879	5.90091	904	3290	702	868	1160.26	1021	1278.11	1212	Antibiotic analog of [cloxacillin].	pbpA
Fluorometholone	5	DB00324	-8.80257	0.7586	6.56719	376.468	5.8984	106	483	377	869	359.877	112	268.245	98	A glucocorticoid employed, usually as eye drops, in the treatment of allergic and inflammatory conditions of the eye. It has also been used topically in the treatment of various skin disorders. (From Martindale, The Extra Pharmacopoeia, 30th ed, p732)	NR3C1
Estazolam	2	DB01215	-7.08189	0.65886	6.08104	294.745	5.89818	1324	1011	1140	870	1073.41	892	1151.28	1020	A benzodiazepine with anticonvulsant, hypnotic, and muscle relaxant properties. It has been shown in some cases to be more potent than diazepam or nitrazepam.	GABRB3,GABRD,GABRE,GABRP,GABRR1,GABRR2,GABRR3,GABRA1,GABRA2,GABRA3,GABRA5,GABRG1,GABRG2,GABRG3,GABRB1,GABRB2
Alpha-Hydroxy-Beta-Phenyl-Propionic-Acid	4	DB02494	-4.79689	0.29416	3.60961	166.176	5.8976	3714	3538	4067	871	2612	3428	3766.67	4426	NA	RPL26L1,RPL8,RPL37,RPL3,RPL11,NHP2L1,CPA1,pdh,PGA3,RPL10L,RPL13A,RPL23,RPL15,RPL19,RPL23A,RSL24D1
Trandolapril	0	DB00519	-6.56945	0.16003	5.93131	430.545	5.89711	2077	4209	1439	872	1819.9	2143	2325.73	2821	Trandolapril is a non-sulhydryl prodrug that belongs to the angiotensin-converting enzyme (ACE) inhibitor class of medications. It is metabolized to its biologically active diacid form, trandolaprilat, in the liver. Trandolaprilat inhibits ACE, the enzyme responsible for the conversion of angiotensin I (ATI) to angiotensin II (ATII). ATII regulates blood pressure and is a key component of the ren…	ACE
5-Hydroxy-2-(Hydroxymethyl)-4h-Pyran-4-One	0	DB01759	-4.67587	0.45343	3.8371	142.11	5.89627	3786	2439	3918	873	2370.65	3060	3307.39	4066	NA	NA
3-CARBOXAMIDO-1,3,5(10)-ESTRATRIEN-17(R)-SPIRO-2'(5',5'-DIMETHYL-6'OXO)TETRAHYDROPYRAN	0	DB07700	-10.233	0.34412	6.54504	395.543	5.89564	6	3229	399	874	286.699	75	197.726	58	NA	AKR1C3
4-({4-[(6-CHLORO-1-BENZOTHIEN-2-YL)SULFONYL]-2-OXOPIPERAZIN-1-YL}METHYL)BENZENECARBOXIMIDAMIDE	0	DB08495	-7.56898	0.45571	6.33263	462.984	5.89552	770	2418	679	875	1025.55	808	1081.28	936	NA	F10
2-Oxo-4-Methylpentanoic-Acid	4	DB03229	-3.76964	0.72998	3.79524	130.143	5.89205	4207	632	3943	876	1740.83	2000	2188.63	2627	NA	cefE,Not-Available
4-{[1-Methyl-5-(2-Methyl-Benzoimidazol-1-Ylmethyl)-1h-Benzoimidazol-2-Ylmethyl]-Amino}-Benzamidine	2	DB02354	-8.3395	0.57982	6.8079	423.524	5.89142	255	1518	166	877	487.225	196	400.535	193	NA	PRSS1
HONH-BENZYLMALONYL-L-ALANYLGLYCINE-P-NITROANILIDE	2	DB07434	-7.24894	0.3281	6.3279	457.443	5.89134	1116	3331	687	878	1223.69	1112	1366.88	1334	NA	npr
4-(2-(1H-IMIDAZOL-4-YL)ETHYLAMINO)-2-(PHENYLAMINO)PYRAZOLO[1,5-A][1,3,5]TRIAZINE-8-CARBONITRILE	7	DB08345	-5.99754	0.47639	6.1216	345.37	5.89131	2753	2277	1042	879	1547.95	1668	1869.3	2122	NA	CSNK2A1
Dimercaprol	8	DB06782	-2.27902	0.6969	3.51661	124.23	5.8912	4476	806	4126	880	1902.43	2280	2459.9	3018	Dimercaprol is a traditional chelating agent developed by British biochemists at Oxford University during World War II. It was developed as an experimental antidote against the arsenic-based poison gas Lewisite. It has been used clinically since 1949 in arsenic, cadmium and mercury poisoning. In addition, it has in the past been used for the treatment of Wilson's disease, a genetic disorder in wh…	Not-Available,Not-Available,Not-Available
(2S)-4-(2,5-difluorophenyl)-N-[(3R,4S)-3-fluoro-1-methylpiperidin-4-yl]-2-(hydroxymethyl)-N-methyl-2-phenyl-2,5-dihydro-1H-pyrrole-1-carboxamide	0	DB08037	-7.72383	0.36127	6.20451	459.512	5.8911	638	3104	876	881	1111.87	958	1201.57	1093	NA	KIF11
Enprofylline	3	DB00824	-5.02166	0.85692	5.03442	194.194	5.89094	3571	184	2892	882	1137.81	988	1238.61	1147	Enprofylline is a derivative of theophylline which shares bronchodilator properties. Enprofylline is used in asthma, chronic obstructive pulmonary disease, and in the management of cerebrovascular insufficiency, sickle cell disease, and diabetic neuropathy. Long-term enprofylline administration may be associated with elevation in liver enzyme levels and unpredictable blood levels.	PDE4A,PDE4B,ADORA2B
L-Citrulline	6	DB00155	-4.37908	0.6053	4.22519	175.188	5.89049	3961	1334	3651	883	2031.58	2497	2681.99	3346	Citrulline is an amino acid. It is made from ornithine and carbamoyl phosphate in one of the central reactions in the urea cycle. It is also produced from arginine as a by-product of the reaction catalyzed by NOS family. Its name is derived from citrullus, the Latin word for watermelon, from which it was first isolated.	PADI1,PADI3,PADI2,PADI4,ASS1,DDAH2,ASS1,DDAH1,OTC,NOS1,NOS2,NOS3,PADI6
Benzamidine	2	DB03127	-4.29885	0.42975	3.45193	121.163	5.89036	4000	2611	4178	884	2492.14	3240	3520.56	4263	NA	CSNK2A1,KLK6,PRSS2,PRSS3,ATOX1,DCI,sprT,ST14,PLAU,PRSS1
Amoxicillin	0	DB01060	-7.41867	0.33334	5.42949	365.411	5.88986	924	3296	2351	885	1586.59	1737	1927.39	2204	A broad-spectrum semisynthetic antibiotic similar to ampicillin except that its resistance to gastric acid permits higher serum levels with oral administration. Amoxicillin is commonly prescribed with clauvanic acid (a beta lactamase inhibitor) as it is susceptible to beta-lacatamase degradation.	pbpA
D-Xylulose	0	DB03947	-4.06057	0.56701	3.19719	150.13	5.88918	4102	1616	4326	886	2245.12	2848	3060.84	3817	NA	xylA
Capecitabine	8	DB01101	-5.82916	0.55376	5.70733	359.354	5.88886	2919	1711	1869	887	1696.31	1930	2105.54	2483	Capecitabine is an orally-administered chemotherapeutic agent used in the treatment of metastatic breast and colorectal cancers. Capecitabine is a prodrug, that is enzymatically converted to fluorouracil (antimetabolite) in the tumor, where it inhibits DNA synthesis and slows growth of tumor tissue.	TYMS,Not-Available,Not-Available
3-(3-aminophenyl)-N-(3-chlorophenyl)pyrazolo[1,5-a]pyrimidin-5-amine	2	DB07698	-7.38059	0.69144	6.51335	335.798	5.88852	964	834	440	888	748.647	463	707.237	497	NA	GSG2
Dihydrotachysterol	4	DB01070	-8.24906	0.53041	6.77886	398.675	5.88803	291	1869	189	889	549.815	246	468.441	254	A vitamin D that can be regarded as a reduction product of vitamin D2.	VDR
3-METHOXY-6-[4-(3-METHYLPHENYL)-1-PIPERAZINYL]PYRIDAZINE	1	DB08017	-6.46365	0.30162	5.35923	284.363	5.888	2199	3494	2442	890	2021.49	2486	2657.24	3305	NA	Not-Available,Not-Available
2-Methyl-3-(2-Aminothiazolo)Propanal	0	DB03024	-4.46408	0.56698	4.36192	170.237	5.88758	3915	1617	3532	891	2112.69	2630	2817.22	3525	NA	REN
{4-[3-(6,7-Diethoxy-Quinazolin-4-Ylamino)-Phenyl]-Thiazol-2-Yl}-Methanol	5	DB02848	-6.67006	0.436	6.70783	422.51	5.8857	1942	2562	236	892	1011.64	784	1054.99	909	NA	FBP1
Diflorasone	0	DB00223	-9.50541	0.60315	6.42201	410.457	5.88542	19	1352	558	893	336.36	96	242.915	82	Diflorasone is a topical corticosteroid used to treat itching and inflammation of the skin.	NR3C1
N-[(1S)-2-[(4-cyano-1-methylpiperidin-4-yl)amino]-1-(cyclohexylmethyl)-2-oxoethyl]morpholine-4-carboxamide	1	DB08752	-6.81197	0.62296	6.57004	405.543	5.88529	1741	1224	371	894	916.902	646	924.666	766	NA	CTSS
Torasemide	4	DB00214	-6.1826	0.62675	6.25367	348.428	5.88525	2549	1199	803	895	1217.4	1101	1348.86	1314	Torasemide is a high-ceiling loop diuretic.[A174463] Structurally, it is a pyridine-sulfnyl urea used as an antihypertensive agent.[A319] On the FDA records, torasemide was developed and first introduced by the company Teva Pharmaceuticals and FDA approved in 2002.[L5248] However, torasemide was first approved for clinical use by the FDA on 1993.[L5257]	SLC12A1
Droperidol	1	DB00450	-7.64887	0.78554	6.95241	379.435	5.88492	707	380	95	896	388.874	125	294.426	113	A butyrophenone with general properties similar to those of haloperidol. It is used in conjunction with an opioid analgesic such as fentanyl to maintain the patient in a calm state of neuroleptanalgesia with indifference to surroundings but still able to cooperate with the surgeon. It is also used as a premedicant, as an antiemetic, and for the control of agitation in acute psychoses. (From Marti…	DRD2,ADRA1A
Isoformononetin	0	DB04202	-7.45065	0.78142	5.65577	268.268	5.88478	886	398	1978	897	889.373	617	886.845	708	NA	NA
6-(2-fluorophenyl)-N-(pyridin-3-ylmethyl)imidazo[1,2-a]pyrazin-8-amine	5	DB08532	-6.58508	0.29097	5.99031	319.343	5.88371	2051	3556	1326	898	1716.67	1964	2130.54	2529	NA	CDK2
7-amino-2-tert-butyl-4-{[2-(1H-imidazol-4-yl)ethyl]amino}pyrido[2,3-d]pyrimidine-6-carboxamide	2	DB07042	-6.8862	0.75081	6.78588	354.418	5.88279	1630	522	184	899	612.504	307	538.963	315	NA	ligA
2-O-(3'-AMIDINOPHENYL)-5-O-(4''-AMIDINOPHENYL}-1,4:3,6-DIANHYDRO-D-SORBITOL	3	DB04793	-7.54693	0.59299	5.60533	382.42	5.88244	793	1430	2066	900	1205.02	1080	1328.15	1288	NA	PRSS1
Methadone	0	DB00333	-6.45862	0.34328	5.81483	309.453	5.88194	2205	3233	1657	901	1806.2	2113	2277.43	2765	"A synthetic opioid that is used as the hydrochloride. It is an opioid analgesic that is primarily a mu-opioid agonist. It has actions and uses similar to those of morphine. It also has a depressant action on the cough center and may be given to control intractable cough associated with terminal lung cancer. Methadone is also used as part of the treatment of dependence on opioid drugs, although p…	OPRM1,GRIN3A,CHRNA10,OPRD1
8-Methyl-9-Oxoguanine	1	DB02993	-4.91569	0.9096	4.58385	166.14	5.88194	3634	81	3323	902	969.174	726	992.659	840	NA	NA
4-Methyl-2,5-dimethoxyamphetamine	9	DB01528	-4.62924	0.31812	4.40272	209.289	5.88181	3814	3386	3486	903	2525.05	3294	3557.39	4299	A psychedelic phenyl isopropylamine derivative, commonly called DOM, whose mood-altering effects and mechanism of action may be similar to those of LSD.	NA
Risperidone	0	DB00734	-8.28484	0.58964	6.47444	410.493	5.88181	270	1446	484	904	642.89	345	573.842	351	"Schizophrenia and various mood disorders are thought to be caused by an excess of dopaminergic D2 and serotonergic 5-HT2A activity, resulting in overactivity of central mesolimbic pathways and mesocortical pathways, respectively [L1212, L1213].	ADRA2B,ADRA2C,HTR2C,HTR1A,DRD1,HTR2A,DRD2,DRD3,DRD4,ADRA1A,ADRA1B,HTR1D,HRH1,ADRA2A
Fluvastatin	3	DB01095	-7.67679	0.27633	5.94191	411.473	5.88075	675	3646	1426	905	1334.97	1287	1519.66	1575	Fluvastatin is an antilipemic agent that competitively inhibits hydroxymethylglutaryl-coenzyme A (HMG-CoA) reductase. HMG-CoA reductase catalyzes the conversion of HMG-CoA to mevalonic acid, the rate-limiting step in cholesterol biosynthesis. Fluvastatin belongs to a class of medications called statins and is used to reduce plasma cholesterol levels and prevent cardiovascular disease. It is also …	HMGCR
N-[(13-CYCLOHEXYL-6,7-DIHYDROINDOLO[1,2-D][1,4]BENZOXAZEPIN-10-YL)CARBONYL]-2-METHYL-L-ALANINE	1	DB08031	-7.94855	0.16766	6.36515	446.547	5.88055	455	4176	636	906	1022.91	803	1065.15	920	NA	Not-Available
Tartronate	0	DB03680	-3.41996	0.53105	2.75989	118.044	5.88022	4305	1862	4477	907	2388.56	3084	3298.48	4061	NA	ME2,ME3
Tiagabine	0	DB00906	-6.81953	0.11432	5.86032	375.559	5.88008	1725	4366	1574	908	1811.3	2127	2280.13	2770	Tiagabine is an anti-convulsive medication. It is also used in the treatment for panic disorder as are a few other anticonvulsants. Though the exact mechanism by which tiagabine exerts its effect on the human body is unknown, it does appear to operate as a selective GABA reuptake inhibitor.	SLC6A1
Clobetasol	0	DB11750	-9.57694	0.75579	6.77715	410.913	5.87993	13	500	190	909	183.045	35	107.289	19	Clobetasol is under investigation for the treatment of Scleroderma. Clobetasol has been investigated for the prevention of Psoriasis and Cutaneous Atrophy Due to Corticosteroids.	NA
2-O-(4'-AMIDINOPHENYL)-5-O-(3''-AMIDINOPHENYL)-1,4:3,6-DIANHYDRO-D-SORBITOL	2	DB04791	-7.46186	0.48906	5.33053	382.42	5.87969	871	2180	2498	910	1441.38	1473	1680.18	1818	NA	PRSS1
2-Dehydropantoate	0	DB03795	-4.21972	0.53977	3.558	146.142	5.87962	4033	1810	4104	911	2285.64	2905	3105.78	3869	NA	panB
2-{4-[4-({4-[2-methyl-1-(1-methylethyl)-1H-imidazol-5-yl]pyrimidin-2-yl}amino)phenyl]piperazin-1-yl}-2-oxoethanol	6	DB07982	-6.66953	0.36906	6.50633	435.532	5.87861	1943	3038	448	912	1246.19	1148	1382.86	1363	NA	CDK2
Metaxalone	0	DB00660	-5.9962	0.27864	4.60665	221.256	5.87839	2758	3631	3301	913	2343.87	3007	3209.39	3973	Metaxalone is a moderate to strong muscle relaxant used in the symptomatic treatment of musculoskeletal pain caused by strains, sprains, and other musculoskeletal conditions. It is marketed by King Pharmaceuticals under the brand name Skelaxin庐. Its main mechanism of action is thought to involve general central nervous system depression. Metaxalone is associated with few side effects and is avail…	NA
Alphamethadol	0	DB01498	-6.43322	0.28969	5.71968	311.469	5.87799	2238	3567	1850	914	1916.77	2305	2453.46	3005	NA	NA
2-Isobutyl-3-Methoxypyrazine	4	DB04512	-4.29142	0.77661	4.68968	166.224	5.87733	4005	414	3218	915	1486.46	1560	1747.42	1913	NA	LCN9
D-phenylalanyl-N-{4-[amino(iminio)methyl]benzyl}-L-prolinamide	0	DB07005	-7.78296	0.35088	6.16754	394.499	5.87732	577	3185	953	916	1125.43	974	1205.39	1099	NA	F2
4-(5-phenyl-1H-pyrrolo[2,3-b]pyridin-3-yl)benzoic-acid	0	DB08191	-8.14875	0.95127	6.25074	314.344	5.87693	333	17	806	917	254.331	61	165.86	42	NA	SGK1
Beta-(2-Naphthyl)-Alanine	5	DB01766	-6.03863	0.36344	4.80531	215.252	5.87604	2708	3088	3133	918	2214.53	2801	2970.04	3706	NA	YARS,PIN1,F2
Niacin	3	DB00627	-4.03875	0.65682	3.44329	123.111	5.87592	4117	1021	4184	919	2005.06	2458	2600.56	3216	A water-soluble vitamin of the B complex occurring in various animal and plant tissues. It is required by the body for the formation of coenzymes NAD and NADP. It has pellagra-curative, vasodilating, and antilipemic properties.	GPR109B,GPR109A,QPRT,NNMT
2-{[4-(4-pyridin-4-yl-1H-pyrazol-3-yl)phenoxy]methyl}quinoline	0	DB08386	-7.78845	0.52345	6.78788	378.435	5.87563	572	1912	182	920	654.163	353	583.873	367	NA	PDE10A
(1S,2S,5S)2-(4-GLUTARIDYLBENZYL)-5-PHENYL-1-CYCLOHEXANOL	4	DB07909	-7.50657	0.59998	5.81088	381.472	5.87527	828	1380	1669	921	1151.21	1006	1240.1	1150	NA	Not-Available,IGHG1,IGKC
Udenafil	4	DB06267	-6.74932	0.50817	7.37662	516.668	5.87523	1834	2025	10	922	430.169	157	333.637	141	Udenafil is a new phosphodiesterase type 5 (PDE5) inhibitor used to treat erectile dysfunction (ED). It has been approved in South Korea and will be marketed under the brand name Zydena. It is not yet approved for use in the U.S., E.U., or Canada.	PDE5A
(2R,3R,4S,5R)-2-[6-amino-8-[(3,4-dichlorophenyl)methylamino]purin-9-yl]-5-(hydroxymethyl)oxolane-3,4-diol	5	DB07045	-7.02789	0.43327	6.00623	441.275	5.875	1417	2585	1287	923	1444.28	1480	1676.76	1816	NA	BAG1,HSPA8
3-Chlorophenol	0	DB01957	-4.31523	0.71377	3.48161	128.558	5.87331	3989	712	4164	924	1818.16	2142	2278.34	2767	NA	E
N-[(2',4'-DIFLUORO-4-HYDROXY-5-IODOBIPHENYL-3-YL)CARBONYL]-BETA-ALANINE	2	DB07963	-6.98637	0.53636	5.99828	447.175	5.87328	1479	1830	1308	925	1345.22	1308	1524.08	1584	NA	NA
Lorazepam	2	DB00186	-7.22955	0.23537	5.34142	321.163	5.87288	1140	3876	2477	926	1784.25	2074	2220.27	2675	Lorazepam is a short-acting and rapidly cleared benzodiazepine used commonly as a sedative and anxiolytic.[A957] It was developed by DJ Richards, presented and marketed initially by Wyeth Pharmaceuticals in the USA in 1977. The first historic FDA label approval is reported in 1985 by the company Mutual Pharm.[L5095]	GABRG1,GABRG2,GABRG3,GABRD,GABRE,GABRP,GABRR1,GABRR2,GABRR3,GABRQ,GABRA1,TSPO,GABRA2,GABRA3,GABRA4,GABRA5,GABRA6,GABRB1,GABRB2,GABRB3
Spectinomycin	1	DB00919	-6.94198	0.40447	4.17729	332.353	5.8711	1551	2798	3682	927	1961.8	2382	2518.73	3102	An antibiotic produced by Streptomyces spectabilis. It is active against gram-negative bacteria and used for the treatment of gonorrhea.	rpsL
1-Bromopropane-2-Ol	7	DB03335	-2.39189	0.7393	3.04902	138.992	5.87068	4465	584	4381	928	1804.43	2110	2252.18	2724	NA	linB
Diltiazem	0	DB00343	-6.90583	0.2577	5.91784	414.527	5.86996	1603	3757	1472	929	1694.04	1927	2069.64	2414	Diltiazem is a benzothiazepine derivative with antihypertensive and vasodilating properties. Approved in 1982 by the FDA, it is a member of the non-dihydropyridine calcium channel blockers drug class. It works through various mechanisms of action, but it primarily works by inhibiting the calcium influx into cardiac and vascular smooth muscle during depolarization.[label] Compared to dihydropyridi…	CACNG1
(1S,3aS,5aR,8aS)-1,7,7-trimethyl-1,2,3,3a,5a,6,7,8-octahydrocyclopenta[c]pentalene-4-carboxylic-acid	8	DB06903	-6.84447	0.44865	5.60578	234.339	5.8697	1685	2469	2065	930	1681.24	1907	2048.08	2378	NA	ptlH
(4aS,4bR,10bS,12aS)-12a-methyl-1,3-dioxo-2-(pyridin-3-ylmethyl)-1,2,3,4,4a,4b,5,6,10b,11,12,12a-dodecahydronaphtho[2,1-f]isoquinolin-8-yl-sulfamate	0	DB08418	-9.3151	0.2514	6.63392	469.563	5.86966	36	3795	302	931	442.708	166	345.547	151	NA	CA2
3-FLUORO-5-MORPHOLIN-4-YL-N-[3-(2-PYRIDIN-4-YLETHYL)-1H-INDOL-5-YL]BENZAMIDE	2	DB08091	-7.63044	0.1891	6.18201	444.51	5.8695	722	4096	927	932	1264.29	1183	1399.56	1392	NA	MAPK14
Alfentanil	0	DB00802	-6.46693	0.22882	6.19168	416.526	5.86935	2196	3911	905	933	1641.02	1837	1980.87	2289	A short-acting opioid anesthetic and analgesic derivative of fentanyl. It produces an early peak analgesic effect and fast recovery of consciousness. Alfentanil is effective as an anesthetic during surgery, for supplementation of analgesia during surgical procedures, and as an analgesic for critically ill patients.	OPRM1
2-(4-(AMINOMETHYL)PIPERIDIN-1-YL)-N-(3_CYCLOHEXYL-4-OXO-2,4-DIHYDROINDENO[1,2-C]PYRAZOL-5-YL)ACETAMIDE	8	DB07618	-7.54018	0.69895	6.71971	421.545	5.86911	798	788	228	934	604.927	295	523.385	301	NA	CDK2
(1-Methyl-1h-Imidazol-2-Yl)-(3-Methyl-4-{3-[(Pyridin-3-Ylmethyl)-Amino]-Propoxy}-Benzofuran-2-Yl)-Methanone	1	DB03062	-6.73205	0.15495	5.91087	404.47	5.86884	1856	4234	1482	935	1816.55	2134	2266.69	2744	NA	NMT1,NMT1
(4s)-5-Fluoro-L-Leucine	9	DB02542	-3.83072	0.52177	3.91718	149.165	5.86811	4188	1921	3866	936	2322.83	2969	3144.84	3906	NA	UBB
4-(4-Hydroxy-3-Isopropylphenylthio)-2-Isopropylphenol	3	DB02881	-6.4477	0.31081	5.87076	302.439	5.86811	2220	3440	1553	937	1825.81	2151	2280.49	2771	NA	NA
3-(4-Amino-1-Tert-Butyl-1h-Pyrazolo[3,4-D]Pyrimidin-3-Yl)Phenol	1	DB04463	-6.68247	0.69514	6.04179	283.335	5.86783	1924	815	1213	938	1155.73	1013	1239.01	1149	NA	CBR1
Quisqualate	3	DB02999	-4.73853	0.29583	3.91452	189.127	5.86741	3754	3531	3867	939	2633.95	3464	3714.69	4396	An agonist at two subsets of excitatory amino acid receptors, ionotropic receptors that directly control membrane channels and metabotropic receptors that indirectly mediate calcium mobilization from intracellular stores. The compound is obtained from the seeds and fruit of Quisqualis chinensis. [PubChem]	GRIA2,GRIK2
O,O-DIETHYL-HYDROGEN-THIOPHOSPHATE	3	DB07674	-3.20167	0.63616	3.40096	170.17	5.86731	4347	1134	4211	940	2101.74	2618	2748.29	3436	NA	opdA
N-[[3-FLUORO-4-ETHOXY-PYRID-2-YL]ETHYL]-N'-[5-CHLORO-PYRIDYL]-THIOUREA	0	DB07797	-5.88806	0.09276	5.82836	354.838	5.86679	2865	4414	1630	941	2098.62	2609	2741.88	3433	NA	gag-pol
2-ANILINO-6-CYCLOHEXYLMETHOXYPURINE	3	DB06948	-6.63423	0.12297	5.69877	323.4	5.86653	1994	4345	1889	942	1981.52	2421	2538.92	3134	NA	CCNA2,CDK2
Aripiprazole	0	DB01238	-7.32714	0.47077	6.78372	448.394	5.86569	1013	2313	186	943	800.668	520	758.169	550	Aripiprazole is an atypical antipsychotic orally indicated for treatment of schizophrenia, bipolar I, major depressive disorder, irritability associated with autism, and Tourette's[Label]. It is also indicated as an injection for agitation associated with schizophrenia or bipolar mania[Label]. Aripiprazole exerts its effects through agonism of dopaminic and 5-HT1A receptors and antagonism of alph…	HTR7,DRD1,DRD5,DRD3,DRD4,HRH1,ADRA1A,ADRA1B,ADRA2A,ADRA2B,HTR2A,ADRA2C,CHRM1,CHRM2,CHRM3,CHRM4,CHRM5,DRD2,HTR1A,HTR1B,HTR1D,HTR1E,HTR2C,HTR3A,HTR6
[1-(1-Benzyl-3-Hydroxy-2-Oxo-Propylcarbamoyl)-2-Phenyl-Ethyl]-Carbamic-Acid-Benzyl-Ester	3	DB01871	-6.75606	0.14127	5.40242	460.53	5.8644	1821	4286	2385	944	2047.41	2525	2650.23	3292	NA	Not-Available,CTSF
Isocarboxazid	0	DB01247	-5.89742	0.72714	4.71293	231.255	5.86422	2854	646	3200	945	1536.62	1649	1806.95	2019	Isocarboxazid has the formula 1-benzyl-2-(5-methyl-3-isoxazolylcarbonyl)hydrazine-isocarboxazid. It is a monoamine oxidase inhibitor.[A31930] It is used in the treatment of major depression, dysthymic disorder, atypical disorder, panic disorder and the phobic disorders.[T115] It was first introduced by Roche pharmaceuticals, further developed by Validus pharms Inc and first FDA approved as a pres…	MAOA,MAOB
1-((2-HYDROXYETHOXY)METHYL)-5-(3-(BENZYLOXY)BENZYL)-6-HYDROXYPYRIMIDINE-2,4(1H,3H)-DIONE	0	DB07439	-7.40233	0.45508	5.91388	398.415	5.864	939	2428	1476	946	1335.74	1289	1498.53	1537	NA	udp
2-(4-fluorophenyl)-N-{[3-fluoro-4-(1H-pyrrolo[2,3-b]pyridin-4-yloxy)phenyl]carbamoyl}acetamide	0	DB06997	-8.14173	0.2627	5.97895	422.391	5.86319	344	3736	1348	947	1131.75	979	1201.02	1087	NA	MET
5-[4-(DIMETHYLAMINO)PHENYL]-6-[(6-MORPHOLIN-4-YLPYRIDIN-3-YL)ETHYNYL]PYRIMIDIN-4-AMINE	0	DB07280	-7.28085	0.28886	6.49009	400.486	5.8628	1072	3574	465	948	1139.99	992	1212.27	1116	NA	ADK
SB220025	5	DB04338	-6.64151	0.54864	6.51659	338.39	5.86263	1984	1749	434	949	1093.38	926	1146.24	1011	NA	MAPK14,MAPK1
SR12813	9	DB04466	-5.71451	0.39396	6.22936	504.541	5.86007	3033	2862	834	950	1619.41	1798	1934.5	2221	NA	NR1I2
Delavirdine	2	DB00705	-7.5908	0.53269	6.52698	456.572	5.85944	757	1853	416	951	863.1	589	835.644	643	A potent, non-nucleoside reverse transcriptase inhibitor with activity specific for HIV-1.	Not-Available
5-FLUORO-1-[4-(4-PHENYL-3,6-DIHYDROPYRIDIN-1(2H)-YL)BUTYL]QUINAZOLINE-2,4(1H,3H)-DIONE	2	DB07787	-7.39129	0.36286	6.06285	393.462	5.85907	948	3094	1182	952	1347.86	1311	1513.5	1567	NA	PARP1
N-[1-(AMINOMETHYL)CYCLOPROPYL]-3-(BENZYLSULFONYL)-N~2~-[(1S)-2,2,2-TRIFLUORO-1-(4-HYDROXYPHENYL)ETHYL]-L-ALANINAMIDE	0	DB07589	-7.32714	0.40819	6.4115	485.528	5.85835	1014	2765	573	953	1112.36	959	1171.2	1047	NA	CTSS
3-((3-bromo-5-o-tolylpyrazolo[1,5-a]pyrimidin-7-ylamino)methyl)pyridine-1-oxide	0	DB07179	-7.59083	0.3681	6.29707	410.275	5.85824	756	3047	734	954	1126.96	976	1191.32	1079	NA	CDK2
6-(2-fluorobenzyl)-2,4-dimethyl-4,6-dihydro-5H-thieno[2',3':4,5]pyrrolo[2,3-d]pyridazin-5-one	2	DB07628	-6.92768	0.79666	6.4291	327.384	5.85818	1573	345	547	955	729.684	431	667.081	459	NA	PKM2
1-(5-OXO-2,3,5,9B-TETRAHYDRO-1H-PYRROLO[2,1-A]ISOINDOL-9-YL)-3-(5-PYRROLIDIN-2-YL-1H-PYRAZOL-3-YL)-UREA	5	DB06976	-7.46108	0.48018	6.22478	366.425	5.85817	873	2250	842	956	1121.35	966	1182.6	1069	NA	CDK2
Topotecan	1	DB01030	-7.77753	0.70773	6.50917	421.453	5.8581	583	743	444	957	654.995	355	577.227	358	An antineoplastic agent used to treat ovarian cancer. It works by inhibiting DNA topoisomerases, type I.	TOP1,TOP1MT,Not-Available
4-[3-(1,4-diazepan-1-ylcarbonyl)-4-fluorobenzyl]phthalazin-1(2H)-one	0	DB08058	-8.72508	0.19817	6.03678	380.423	5.85639	125	4052	1221	958	877.334	603	851.985	665	NA	PARP3
Perhexiline	2	DB01074	-6.72882	0.34951	5.65111	277.496	5.85637	1865	3194	1985	959	1835.05	2168	2278.2	2766	Perhexiline is a coronary vasodilator used especially for angina of effort. It may cause neuropathy and hepatitis.	CPT1A,CPT2
4-[(3AS,4R,7R,8AS,8BR)-2-(1,3-BENZODIOXOL-5-YLMETHYL)-7-HYDROXY-1,3-DIOXODECAHYDROPYRROLO[3,4-A]PYRROLIZIN-4-YL]BENZENECARBOXIMIDAMIDE	0	DB08546	-8.65475	0.11645	5.93486	448.479	5.85626	154	4360	1434	960	980.521	751	987.458	833	NA	F2
Idarubicin	0	DB01177	-10.3679	0.50186	6.03041	497.5	5.85612	3	2076	1236	961	293.273	76	197.449	57	An orally administered anthracycline antineoplastic. The compound has shown activity against breast cancer, lymphomas and leukemias, together with the potential for reduced cardiac toxicity.	Not-Available,TOP2A
4-CHLORO-3',3''-DIBROMOPHENOL-1,8-NAPHTHALEIN	1	DB04696	-8.86108	0.52603	6.77001	560.625	5.85441	96	1894	194	962	429.197	155	327.958	138	NA	thyA
2-({4-[4-(pyridin-4-ylmethyl)-1H-pyrazol-3-yl]phenoxy}methyl)quinoline	9	DB08384	-7.28441	0.36569	6.59511	392.462	5.85309	1067	3068	345	963	1021.21	799	1041.39	893	NA	PDE10A
2-Hydroxy-5-({1-[(2-Naphthyloxy)Methyl]-3-Oxoprop-1-Enyl}Amino)Tyrosine	0	DB02511	-7.92467	0.34545	5.77641	422.437	5.8528	473	3221	1741	964	1264.54	1184	1384.26	1364	NA	Not-Available
6,6-DIMETHYL-1-[3-(2,4,5-TRICHLOROPHENOXY)PROPOXY]-1,6-DIHYDRO-1,3,5-TRIAZINE-2,4-DIAMINE	0	DB08734	-6.8353	0.60675	6.62645	394.69	5.85248	1700	1324	311	965	906.58	635	887.903	710	NA	TYMS
Mifepristone	0	DB00834	-8.70735	0.4332	7.02801	429.604	5.85216	134	2586	59	966	374.879	119	273.44	100	Mifepristone is a progestational and glucocorticoid hormone antagonist. Its inhibition of progesterone induces bleeding during the luteal phase and in early pregnancy by releasing endogenous prostaglandins from the endometrium or decidua. As a glucocorticoid receptor antagonist, the drug has been used to treat hypercortisolism in patients with nonpituitary cushing syndrome. The two marketed forms…	PGR,NR3C1
(4R)-4-(3-HYDROXYPHENYL)-N,N,7,8-TETRAMETHYL-3,4-DIHYDROISOQUINOLINE-2(1H)-CARBOXAMIDE	5	DB07064	-7.35791	0.26522	5.69449	324.424	5.85194	980	3719	1896	967	1607.79	1776	1904.72	2169	NA	KIF11
Cyclopropyl-{4-[5-(3,4-Dichlorophenyl)-2-[(1-Methyl)-Piperidin]-4-Yl-3-Propyl-3h-Imidazol-4-Yl]-Pyrimidin-2-Yl}Amine	1	DB03084	-6.87716	0.14014	6.81331	485.463	5.85149	1645	4290	163	968	1027.24	812	1047.78	902	NA	MAPK10
(1-HYDROXY-1-PHOSPHONO-2-[1,1';4',1'']TERPHENYL-3-YL-ETHYL)-PHOSPHONIC-ACID	1	DB07409	-8.50953	0.29841	5.2811	434.321	5.85141	197	3514	2571	969	1145.97	1001	1211.87	1115	NA	uppS
Cefotiam	0	DB00229	-6.94213	0.13086	5.99811	525.642	5.85041	1550	4316	1310	970	1707.51	1949	2061.71	2399	One of the cephalosporins that has a broad spectrum of activity against both gram-positive and gram-negative microorganisms.	pbpA
Nilotinib	0	DB04868	-8.71544	0.06601	6.68844	529.526	5.85027	130	4469	260	971	618.852	313	532.569	307	Nilotinib, also known as AMN107, is a tyrosine kinase inhibitor under investigation as a possible treatment for chronic myelogenous leukemia (CML). A Phase I clinical trial in 2006 showed that this drug was relatively safe and offered significant therapeutic benefits in cases of CML which were found to be resistant to treatment with imatinib (Gleevec), another tyrosine kinase inhibitor used as a …	ABL1,KIT
4-{[5-(CYCLOHEXYLOXY)[1,2,4]TRIAZOLO[1,5-A]PYRIMIDIN-7-YL]AMINO}BENZENESULFONAMIDE	2	DB07688	-7.27047	0.43818	6.61856	388.453	5.85009	1089	2549	324	972	966.946	719	965.267	801	NA	CDK2,CCNA2
4-[4-(4-Methyl-2-Methylamino-Thiazol-5-Yl)-Pyrimidin-2-Ylamino]-Phenol	4	DB04407	-6.56503	0.61293	6.34651	313.386	5.84979	2082	1280	658	973	1142.9	997	1205.88	1101	NA	CDK2
3-(Mercaptomethylene)Pyridine	0	DB04490	-3.67201	0.83193	3.84068	125.196	5.84978	4240	237	3915	974	1399.11	1399	1578.64	1676	NA	gag-pol
1-[2-AMINO-2-CYCLOHEXYL-ACETYL]-PYRROLIDINE-3-CARBOXYLIC-ACID-5-CHLORO-2-(2-ETHYLCARBAMOYL-ETHOXY)-BENZYLAMIDE	6	DB06869	-6.78376	0.41202	6.20577	479.021	5.84887	1779	2748	872	975	1427.84	1447	1621.45	1743	NA	F2
Alprazolam	1	DB00404	-7.66203	0.68366	6.33805	308.772	5.84828	690	881	668	976	793.438	513	740.515	532	Alprazolam is a triazolobenzodiazepine indicated for the treatment of anxiety and panic disorders.[Label] It is mainly metabolized by CYP3As and so is contraindicated with CYP3A inhibitors like ketoconazole and itraconazole.[Label] Benzodiazepine treatment should be stopped gradually by tapering down a patient's dose to avoid withdrawal symptoms.[A18125] Alprazolam's adverse effects are generally…	GABRG1,GABRG2,GABRG3,GABRD,GABRE,GABRP,GABRR1,GABRR2,GABRQ,GABRR3,GABRA1,TSPO,GABRA2,GABRA3,GABRA4,GABRA5,GABRA6,GABRB1,GABRB2,GABRB3
Allyl-{4-[3-(4-Bromo-Phenyl)-Benzofuran-6-Yloxy]-but-2-Enyl}-Methyl-Amine	0	DB03771	-6.87472	0.89186	6.43451	412.327	5.84819	1647	107	541	977	552.449	250	456.834	245	NA	shc
Ethylmethylthiambutene	0	DB01468	-5.25424	0.34142	5.80327	277.458	5.84808	3403	3243	1687	978	2065.69	2555	2650.38	3293	NA	NA
Loracarbef	0	DB00447	-7.93445	0.51904	5.79375	349.774	5.8475	467	1946	1700	979	1108.98	950	1156.03	1025	Loracarbef is a carbacephem antibiotic sometimes grouped together with the second-generation cephalosporin antibiotics. It is marketed under the trade name Lorabid.	pbp3,pbpA
Equilenin	4	DB03515	-8.01214	0.555	5.71058	266.34	5.84613	419	1705	1863	980	1068.67	885	1099.98	957	An estrogenic steroid produced by HORSES. It has a total of five double bonds in the A- and B-ring. High concentration of equilenin is found in the URINE of pregnant mares. [PubChem]	ksi,ksi
Donepezil	0	DB00843	-7.46153	0.52749	5.85029	379.5	5.84606	872	1885	1590	981	1265.39	1187	1377.45	1350	Donepezil (Aricept), is a centrally acting reversible acetyl cholinesterase inhibitor. Its main therapeutic use is in the treatment of Alzheimer's disease where it is used to increase cortical acetylcholine. Donepezil is postulated to exert its therapeutic effect by enhancing cholinergic function. This is accomplished by increasing the concentration of acetylcholine through reversible inhibition …	ACHE,HTR2A
Beta(2-Thienyl)Alanine	0	DB03673	-4.53511	0.32242	3.74642	171.221	5.84577	3879	3365	3970	982	2670.86	3515	3728.19	4408	NA	PAH
8-bromo-4-(2-chlorophenyl)-N-(2-hydroxyethyl)-6-methyl-1,3-dioxo-1,2,3,6-tetrahydropyrrolo[3,4-e]indole-7-carboxamide	1	DB08365	-7.80859	0.62338	6.94598	476.714	5.84501	553	1222	99	983	506.403	213	405.954	198	NA	WEE1
Bicine	0	DB03709	-4.36914	0.65024	3.81449	163.173	5.84462	3966	1060	3930	984	2007.99	2461	2546.93	3145	NA	glf,PLG,mltB
Amikacin	0	DB00479	-8.75158	0.28452	5.059	585.608	5.8444	118	3594	2863	985	1045.75	840	1066.83	921	"Amikacin is a semi-synthetic aminoglycoside antibiotic that is derived from kanamycin A.[FDA label] Amikacin is synthesized by acylation with the l-(-)-纬-amino-伪-hydroxybutyryl side chain at the C-1 amino group of the deoxystreptamine moiety of kanamycin A.[A39531]	rpsL,Not-Available
5-(7-(6-CHLORO-4-(5-HYDRO-4-METHYL-2-OXAZOLYL)PHENOXY)HEPTYL)-3-METHYL-ISOXAZOLE	0	DB08722	-6.39412	0.30508	6.33899	390.911	5.8443	2289	3475	664	986	1510.64	1603	1741.5	1903	5-(7-(6-chloro-4-(5-hydro-4-methyl-2-oxazolyl)phenoxy)heptyl)-3-methyl isoxazole is a solid. This compound belongs to the phenol ethers. These are aromatic compounds containing an ether group substituted with a benzene ring. 5-(7-(6-chloro-4-(5-hydro-4-methyl-2-oxazolyl)phenoxy)heptyl)-3-methyl isoxazole targets the protein genome polyprotein.	Not-Available
(2R)-2-(4-CHLOROPHENYL)-2-[4-(1H-PYRAZOL-4-YL)PHENYL]ETHANAMINE	3	DB07857	-6.97569	0.63487	5.82078	297.789	5.84162	1500	1149	1644	987	1293.18	1228	1415.05	1416	NA	PRKACA,PKIA
2-(1H-INDOL-3-YL)ETHANAMINE	2	DB08653	-5.13023	0.69477	4.4768	160.22	5.84136	3492	816	3416	988	1761	2038	2135.15	2540	NA	aauA,aauB
6-(cyclohexylsulfanyl)-1-(ethoxymethyl)-5-(1-methylethyl)pyrimidine-2,4(1H,3H)-dione	1	DB07184	-6.05695	0.7622	6.38642	326.462	5.84123	2688	467	606	989	931.33	666	912.864	749	NA	gag-pol
Phosphonoacetic-Acid	9	DB02823	-3.04346	0.47334	3.19441	140.031	5.84119	4384	2297	4328	990	2562.94	3353	3519.16	4260	A simple organophosphorus compound that inhibits DNA polymerase, especially in viruses and is used as an antiviral agent. [PubChem]	phoA
{4-[(CARBOXYMETHOXY)CARBONYL]-3,3-DIOXIDO-1-OXONAPHTHO[1,2-D]ISOTHIAZOL-2(1H)-YL}ACETIC-ACID	2	DB07999	-7.11778	0.35706	5.26616	393.329	5.84084	1272	3130	2597	991	1789.14	2084	2178.55	2607	NA	AKR1B1
ginkgolide-A	3	DB06743	-9.29591	0.29056	5.09764	408.403	5.8403	40	3559	2816	992	794.114	514	737.35	528	Ginkgolide A is a highly active PAF antagonist cage molecule that is isolated from the leaves of the Ginkgo biloba tree. Shows potential in a wide variety of inflammatory and immunological disorders.	NA
Pentazocine	1	DB00652	-8.40121	0.58474	6.05144	285.431	5.83999	236	1492	1196	993	804.156	523	749.556	540	The first mixed agonist-antagonist analgesic to be marketed. It is an agonist at the kappa and sigma opioid receptors and has a weak antagonist action at the mu receptor. (From AMA Drug Evaluations Annual, 1991, p97)	OPRM1,OPRK1,SIGMAR1
3,3',5,5'-Tetraiodothyroacetic-Acid	5	DB01751	-5.99216	0.27301	6.37968	747.83	5.83973	2765	3668	618	994	1579.88	1724	1843.76	2082	NA	NA
1,2-Hydro-1-Oxy-3,4-Hydro-3-(1-Methoxy-2-Oxy-3,4-Dihydroxypentyl)-8,9-Dihydroxy-7-(Sec-Butyl)-Anthracene	1	DB04240	-9.0799	0.63944	6.46246	430.497	5.83946	57	1119	504	995	422.902	150	317.964	128	NA	NA
4-[(1S,2S,5S)-5-(HYDROXYMETHYL)-8-METHYL-3-OXABICYCLO[3	0	DB07086	-7.72669	0.84571	5.70401	260.333	5.83919	633	206	1877	996	702.666	401	625.526	406	NA	NCOA2,ESR1
2-Bromo-2-Propene-1-Ol	6	DB04320	-2.3493	0.76962	3.14393	136.976	5.83906	4469	436	4343	997	1704.3	1948	2037.8	2365	NA	linB
2,5-DICHLORO-N-[5-METHOXY-7-(6-METHOXYPYRIDIN-3-YL)-1,3-BENZOXAZOL-2-YL]BENZENESULFONAMIDE	0	DB07321	-7.68271	0.69721	7.14861	480.329	5.83854	672	804	36	998	373.263	116	268.932	99	NA	FBP1
Phenylacetaldehyde	0	DB02178	-4.21332	0.42937	3.50649	120.151	5.83791	4036	2616	4139	999	2570.47	3365	3522.31	4265	NA	tynA
6-BENZYL-1-BENZYLOXYMETHYL-5-ISOPROPYL-URACIL	3	DB08634	-6.46784	0.52211	6.28286	364.445	5.83731	2195	1919	757	1000	1336.29	1290	1471.87	1501	NA	gag-pol
Ribose	8	DB01936	-4.14101	0.66445	3.22997	150.13	5.83712	4071	982	4314	1001	2038.36	2510	2583.63	3193	NA	rbsK
Uridine-Diphosphate-N-Acetylgalactosamine	1	DB02196	-7.79373	0.08393	4.47466	607.355	5.83686	564	4436	3417	1002	1710.79	1956	2044.74	2374	NA	EXTL2,UAP1,GALE,wecB,ABO,murG,Not-Available
2-HYDROXY-3,5-DIIODOBENZOIC-ACID	6	DB04674	-4.56295	0.36333	4.2772	389.914	5.8358	3858	3089	3618	1003	2564.41	3356	3506.57	4249	NA	EDNRA,AKR1C1
(3BETA,7BETA)-CHOLEST-5-ENE-3,7-DIOL	0	DB04706	-8.8505	0.55717	6.97995	402.663	5.8357	101	1690	77	1004	338.929	97	235.993	77	NA	NA
4-Oxo-2-Phenylmethanesulfonyl-Octahydro-Pyrrolo[1,2-a]Pyrazine-6-Carboxylic-Acid-[1-(N-Hydroxycarbamimidoyl)-Piperidin-4-Ylmethyl]-Amide	4	DB02723	-7.42391	0.34414	6.44314	492.602	5.83568	921	3227	527	1005	1120.11	965	1161.33	1029	NA	F2
Mezlocillin	1	DB00948	-7.38465	0.13579	6.04981	539.592	5.83534	954	4304	1199	1006	1491.8	1576	1701.17	1847	Semisynthetic ampicillin-derived acylureido penicillin. It has been proposed for infections with certain anaerobes and may be useful in inner ear, bile, and CNS infections.	pbpA,pbp3,mrdA
N-cyclopropyl-2',6-dimethyl-4'-(5-methyl-1,3,4-oxadiazol-2-yl)biphenyl-3-carboxamide	2	DB07811	-7.62414	0.28997	5.96226	347.418	5.8335	729	3563	1385	1007	1379.61	1368	1532.25	1596	NA	MAPK14
Halofantrine	9	DB01218	-6.30416	0.18029	6.47835	500.432	5.83224	2408	4124	477	1008	1478.22	1545	1679.44	1817	Halofantrine is an antimalarial. It belongs to the phenanthrene class of compounds that includes quinine and lumefantrine. It appears to inhibit polymerisation of heme molecules (by the parasite enzyme "heme polymerase"), resulting in the parasite being poisoned by its own waste. Halofantrine has been shown to preferentially block open and inactivated HERG channels leading to some degree of cardi…	Not-Available,KCNH2,Not-Available
N'-((2S,3R)-3-AMINO-2-HYDROXY-5-(ISOPROPYLSULFANYL)PENTANOYL)-N-3-CHLOROBENZOYL-HYDRAZIDE	0	DB07377	-6.26746	0.12719	5.09807	359.879	5.8322	2450	4333	2815	1009	2343.32	3006	3103.21	3866	NA	METAP2
Alpha-ketoisovalerate	4	DB04074	-3.52763	0.48869	3.14924	116.116	5.83139	4280	2181	4342	1010	2529.46	3298	3435.02	4188	NA	panB,cefE,leuA,BCAT2
Berberine	0	DB04115	-7.55795	0.25614	5.74803	336.367	5.83063	784	3761	1799	1011	1521.77	1618	1744.01	1908	An alkaloid from Hydrastis canadensis L., Berberidaceae. It is also found in many other plants. It is relatively toxic parenterally, but has been used orally for various parasitic and fungal infections and as antidiarrheal.	qacR
L-Leucyl-Hydroxylamine	3	DB03308	-4.20373	0.37841	3.69898	146.19	5.8306	4040	2964	3991	1012	2637.12	3468	3628.95	4341	NA	nprS
N-anthracen-2-yl-5-methyl[1,2,4]triazolo[1,5-a]pyrimidin-7-amine	1	DB08006	-8.43159	0.22374	5.95284	325.375	5.83036	227	3940	1403	1013	1061.81	870	1078.6	934	NA	DHODH
N-(5,6-DIPHENYLFURO[2,3-D]PYRIMIDIN-4-YL)GLYCINE	0	DB07653	-7.46528	0.26253	5.54466	345.358	5.82907	866	3738	2165	1014	1632.73	1821	1913.69	2186	NA	CHEK1
Formic-Acid-Benzyl-Ester	2	DB04569	-4.05245	0.50622	3.43641	136.15	5.82896	4110	2043	4190	1015	2444.54	3165	3276.74	4040	NA	nprS
(1S,3R,6S)-4-oxo-6-{4-[(2-phenylquinolin-4-yl)methoxy]phenyl}-5-azaspiro[2	0	DB07189	-8.7607	0.34927	6.70014	464.521	5.8281	113	3196	250	1016	550.338	247	448.616	234	NA	ADAM17
Phenacetin	0	DB03783	-4.86425	0.75208	4.4739	179.219	5.82792	3668	513	3418	1017	1599.23	1759	1859.69	2110	Phenacetin was withdrawn from the Canadian market in June 1973 due to concerns regarding nephropathy (damage to or disease of the kidney).	PTGS1
Cysteinesulfonic-Acid	1	DB03661	-3.83154	0.47097	3.01097	169.158	5.82733	4187	2311	4397	1018	2565.38	3357	3491.03	4235	Beta-Sulfoalanine. An amino acid with a C-terminal sulfonic acid group which has been isolated from human hair oxidized with permanganate. It occurs normally in the outer part of the sheep&#39;s fleece, where the wool is exposed to light and weather. [PubChem]	fabH,PTPN1,Not-Available,luxS,1,CDC25B,blaVIM-2,TM_1080,CTSL1,Not-Available,prx,def,GLIPR2,TM_1158,def
Trans-2-Phenylcyclopropylamine	0	DB02665	-4.81902	0.40788	3.92659	134.202	5.82694	3698	2768	3858	1019	2518.65	3284	3405.38	4162	A propylamine formed from the cyclization of the side chain of amphetamine. This monoamine oxidase inhibitor is effective in the treatment of major depression, dysthymic disorder, and atypical depression. It also is useful in panic and phobic disorders. (From AMA Drug Evaluations Annual, 1994, p311)	PRSS1
Bithionol	7	DB04813	-5.97144	0.60265	6.19177	356.057	5.82676	2791	1355	904	1020	1366.52	1339	1506.45	1555	Bithionol, formerly marketed as an active ingredient in various topical drug products, was shown to be a potent photosensitizer with the potential to cause serious skin disorders. Approvals of the NDA's for bithionol drug products were withdrawn on October 24, 1967 (see the Federal Register of October 31, 1967 (32 FR 15046)).	NA
Maprotiline	8	DB00934	-6.77731	0.34414	5.67395	277.411	5.82668	1794	3228	1939	1021	1840.09	2182	2239.29	2696	Maprotiline is a tetracyclic antidepressant with similar pharmacological properties to tricyclic antidepressants (TCAs). Similar to TCAs, maprotiline inhibits neuronal norepinephrine reuptake, possesses some anticholinergic activity, and does not affect monoamine oxidase activity. It differs from TCAs in that it does not appear to block serotonin reuptake. Maprotiline may be used to treat depress…	SLC6A2,HRH1,CHRM1,CHRM2,CHRM3,CHRM4,CHRM5,ADRA1A
N-[2-(5-methyl-4H-1,2,4-triazol-3-yl)phenyl]-7H-pyrrolo[2,3-d]pyrimidin-4-amine	1	DB07584	-7.12782	0.80459	6.45221	291.318	5.8264	1261	312	517	1022	675.232	375	588.103	372	NA	AKT1,GSK3B
Amisulpride	2	DB06288	-6.00162	0.17066	5.84717	369.487	5.82583	2748	4162	1598	1023	2079.42	2577	2634.1	3266	Amisulpride (trade name Solian) is an antipsychotic drug sold by Sanofi-Aventis. It is not approved for use in the United States, but is approved for use in Europe and Australia for the treatment of psychoses and schizophrenia. Additionally, it is approved in Italy for the treatment of dysthymia (under the brand name Deniban). Amisulpride is a selective dopamine antagonist.	DRD2,DRD3,HTR7,HTR2A
Mecamylamine	5	DB00657	-5.09566	0.41292	4.53844	167.296	5.82493	3520	2743	3365	1024	2401.67	3100	3190.93	3956	A nicotinic antagonist that is well absorbed from the gastrointestinal tract and crosses the blood-brain barrier. Mecamylamine has been used as a ganglionic blocker in treating hypertension, but, like most ganglionic blockers, is more often used now as a research tool.	CHRNA2
3-(3,5-Dibromo-4-Hydroxy-Benzoyl)-2-Ethyl-Benzofuran-6-Sulfonic-Acid-Dimethylamide	2	DB04142	-7.36486	0.78357	7.08719	531.222	5.82452	974	387	50	1025	372.813	115	266.122	96	NA	PTPN1
1-Ethyl-Pyrrolidine-2,5-Dione	0	DB01902	-3.93451	0.62894	3.63956	127.143	5.82436	4152	1183	4041	1026	2124.32	2655	2707.55	3389	NA	NSF,ERO1LB
2-[1-(4-CHLOROBENZOYL)-5-METHOXY-2-METHYL-1H-INDOL-3-YL]-N-[(1R)-1-(HYDROXYMETHYL)PROPYL]ACETAMIDE	1	DB07981	-7.50473	0.36044	6.4236	428.916	5.82433	831	3111	557	1027	1102.76	940	1129.24	987	NA	PTGS1
GUANOSINE-2',3'-O-METHYLIDENEPHOSPHONATE	1	DB04757	-7.26147	0.42271	4.90394	375.234	5.82408	1101	2677	3048	1028	1743.26	2004	2078.82	2430	NA	PNP
TETRAHEDRAL-INTERMEDIATE-OF-BLASTICIDIN-S	1	DB04649	-7.72797	0.17884	5.48901	440.461	5.82338	632	4131	2255	1029	1568.86	1702	1805.68	2016	NA	bsd
3-phenylpropionic-acid	6	DB02024	-4.62424	0.42997	3.87718	150.177	5.82307	3821	2609	3896	1030	2514.94	3277	3386.54	4145	NA	aspC,tyrB,Not-Available
2,3-Bis-Benzo[1,3]Dioxol-5-Ylmethyl-Succinic-Acid	0	DB02154	-7.66187	0.20417	5.61621	386.356	5.82301	691	4024	2046	1031	1556.23	1682	1785.17	1981	NA	Not-Available,blaIMP-1
2-(4-METHOXYPHENYL)ACETAMIDE	1	DB08767	-4.80259	0.52902	4.21939	165.192	5.82267	3706	1877	3655	1032	2263.26	2875	2940.49	3659	NA	aauA,aauB
Moclobemide	0	DB01171	-5.93305	0.24671	4.65534	268.744	5.82208	2827	3813	3247	1033	2452.13	3177	3271.08	4034	A reversible monoamine oxidase inhibitor (MAOI) selective for isoform A (RIMA) used to treat major depressive disorder. Most meta-analyses and most studies indicate that in the acute management of depression, moclobemide is more efficacious than placebo medication and similarly efficacious as tricyclic antidepressants (TCA) or selective serotonin reuptake inhibitors (SSRIs). Due to negligible ant…	MAOA
(S)-Wiskostatin	8	DB01731	-5.96954	0.43363	5.5368	426.152	5.8211	2794	2584	2180	1034	2008.51	2465	2506.06	3080	NA	WAS
4-Hydroxy-1,2,5-Thiadiazole-3-Carboxylic-Acid	8	DB03162	-3.75754	0.57118	3.60076	146.127	5.82039	4211	1588	4073	1035	2304.21	2940	3008.73	3755	NA	Not-Available
Ergocalciferol	0	DB00153	-8.74678	0.63627	6.94851	396.659	5.82007	120	1132	97	1036	341.814	103	236.193	78	"Ergocalciferol is an inactivated vitamin D analog.[A177526] It is a form of vitamin synthesized by some plants in the presence of UVB light.[T577] The production of ergocalciferol was impulsed by the identification of dietary deficiency, more specifically vitamin D, as the main causative agent for rickets. Impulsed by this research, ergocalciferol was isolated for the first time from yeast in 19…	VDR
5-{[1-(2-fluorobenzyl)piperidin-4-yl]methoxy}quinazoline-2,4-diamine	0	DB07642	-8.03134	0.1565	5.96566	381.455	5.82001	405	4229	1375	1037	1250.1	1156	1330.45	1291	NA	DCPS
Cholic-Acid	2	DB02659	-9.30417	0.80153	6.74333	408.579	5.81998	38	328	211	1038	228.578	47	138.032	34	"A major primary bile acid produced in the liver and usually conjugated with glycine or taurine. It facilitates fat absorption and cholesterol excretion. [PubChem]	COX5B,COX6C,COX7B,COX7C,COX8A,COX6A2,COX6B1,COX7A1,PLA2G1B,CES1,FECH,DKFZp686P18130,cbh,ADH1C,ESRRG,FABP6,COX4I1,MT-CO1,MT-CO2,MT-CO3,COX5A
Pseudoephedrine	3	DB00852	-4.89266	0.31354	3.80547	165.236	5.81988	3647	3421	3935	1039	2672.47	3518	3661.66	4358	An alpha- and beta-adrenergic agonist that may also enhance release of norepinephrine. It has been used in the treatment of several disorders including asthma, heart failure, rhinitis, and urinary incontinence, and for its central nervous system stimulatory effects in the treatment of narcolepsy and depression. It has become less extensively used with the advent of more selective agonists.	SLC6A2,SLC6A3,ADRA1A,ADRA2A,SLC6A4,ADRB2,ADRB1
1-Methyl-2-Oxy-5,5-Dimethyl-Pyrrolidine	0	DB03968	-4.25153	0.69286	3.62494	127.187	5.81984	4022	825	4056	1040	1934.22	2334	2378.65	2895	NA	REN
5-cyclopropyl-2-(4-fluorophenyl)-6-[(2-hydroxyethyl)(methylsulfonyl)amino]-N-methyl-1-benzofuran-3-carboxamide	4	DB07238	-6.55016	0.39046	6.40311	446.5	5.81964	2098	2887	583	1041	1384.66	1375	1522.79	1581	Nesbuvir has been investigated for the treatment of Hepatitis C.	Not-Available,Not-Available
5-(2-ETHOXYETHYL)-5-[4-(4-FLUOROPHENOXY)PHENOXY]PYRIMIDINE-2,4,6(1H,3H,5H)-TRIONE	2	DB08388	-6.57422	0.20204	5.68155	402.378	5.81911	2071	4032	1923	1042	2022.49	2487	2522.86	3108	NA	MMP13
(2S)-2-(4-CHLOROPHENYL)-2-[4-(1H-PYRAZOL-4-YL)PHENYL]ETHANAMINE	4	DB07858	-6.83769	0.32472	5.7822	297.789	5.8189	1696	3352	1723	1043	1787.82	2082	2139.63	2549	NA	PRKACA,PKIA
Ethyl-loflazepate	4	DB01545	-6.5555	0.33771	5.74397	360.772	5.81852	2093	3273	1808	1044	1896.28	2266	2313.69	2802	NA	NA
Naphthalene-Trisulfonate	5	DB04409	-6.44031	0.38669	5.42461	365.342	5.81848	2233	2915	2357	1045	2001.02	2446	2484.82	3044	NA	FGF1
Flecainide	2	DB01195	-6.47445	0.56268	6.06639	414.346	5.81786	2189	1650	1175	1046	1451.53	1496	1619.03	1738	A potent anti-arrhythmia agent, effective in a wide range of ventricular and atrial arrhythmias and tachycardias. Paradoxically, however, in myocardial infarct patients with either symptomatic or asymptomatic arrhythmia, flecainide exacerbates the arrhythmia and is not recommended for use in these patients.	SCN5A,SCN4A
N-(1-PHENYL-PROPYL)-FORMAMIDE	0	DB07436	-5.02887	0.63019	4.46627	163.22	5.81769	3568	1175	3429	1047	1969.67	2399	2431.51	2977	NA	UL80
NAPHTHALEN-2-YL-3-ALANINE	1	DB07365	-6.21869	0.21641	4.43016	215.252	5.81765	2508	3968	3463	1048	2451.48	3175	3254.25	4021	NA	oppA,pol
[4-({4-[(5-cyclopropyl-1H-pyrazol-3-yl)amino]quinazolin-2-yl}amino)phenyl]acetonitrile	1	DB07966	-7.29947	0.85491	7.26012	381.443	5.81749	1044	188	19	1049	250.09	57	155.073	40	NA	SRC
Raltitrexed	8	DB00293	-6.66275	0.07973	5.57562	458.496	5.81733	1949	4446	2110	1050	2093.21	2598	2634.44	3267	Raltitrexed (brand name Tomudex&reg;) is a chemotherapy drug manufactured AstraZeneca Company, is an antimetabolite used in chemotherapy. It is an inhibitor of thymidylate synthase.	TYMS,FPGS
7-[(3-CHLOROBENZYL)OXY]-2-OXO-2H-CHROMENE-4-CARBALDEHYDE	0	DB07512	-7.1342	0.2265	5.28563	314.724	5.81676	1256	3926	2562	1051	1908.89	2295	2329.02	2825	NA	MAOB
5-[(1S)-1-(3-chlorophenyl)ethoxy]quinazoline-2,4-diamine	0	DB07644	-7.83808	0.87219	6.21426	314.776	5.81636	529	143	859	1052	511.329	215	402.033	195	NA	DCPS
Nedocromil	0	DB00716	-7.2632	0.34034	5.93314	371.345	5.81623	1098	3256	1436	1053	1524.82	1622	1725.1	1879	A pyranoquinolone derivative that inhibits activation of inflammatory cells which are associated with asthma, including eosinophils, neutrophils, macrophages, mast cells, monocytes, and platelets.	CYSLTR1,CYSLTR2,FPR1,PTGDR,HSP90AA1
(S)-1-PHENYL-1-[4-(9H-PURIN-6-YL)PHENYL]METHANAMINE	0	DB07855	-7.67774	0.43038	5.88671	301.353	5.8157	674	2607	1525	1054	1296.37	1232	1388.96	1377	NA	PRKACA,PKIA
Morpholine-4-Carboxylic-Acid-[1s-(2-Benzyloxy-1r-Cyano-Ethylcarbamoyl)-3-Methyl-Butyl]Amide	1	DB03767	-6.05995	0.15244	5.41362	402.495	5.81569	2683	4247	2369	1055	2310.1	2951	2999.78	3744	NA	CTSS
Arginineamide	0	DB02299	-4.18614	0.45847	4.34334	174.228	5.81532	4049	2401	3550	1056	2457.02	3188	3255.79	4023	NA	KCNA4
Vitamin-E	7	DB00163	-6.35822	0.32374	6.69294	430.717	5.81437	2340	3359	255	1057	1206.45	1084	1260.83	1188	In 1922, vitamin E was demonstrated to be an essential nutrient[A32448]. Vitamin E is a term used to describe 8 different fat soluble tocopherols and tocotrienols, alpha-tocopherol being the most biologically active[A176104]. Vitamin E acts as an antioxidant, protecting cell membranes from oxidative damage[A176104]. The antioxidant effects are currently being researched for use in the treatment o…	SEC14L2,NR1I2,PRKCB,ALOX5,PRKCA,DGKA,PPP2CB,PPP2CA,SEC14L4,SEC14L3
[[CYCLOHEXANESULFONYL-GLYCYL]-3[PYRIDIN-4-YL-AMINOMETHYL]ALANYL]PIPERIDINE	9	DB07934	-6.32682	0.37855	6.52971	466.628	5.81425	2380	2963	413	1058	1324.91	1275	1428.08	1436	NA	F2
MMDA	8	DB01442	-4.95592	0.50712	4.75188	209.245	5.81363	3611	2033	3173	1059	2228.6	2825	2855.91	3566	MMDA, or 3-methoxy-4,5-methylenedioxyamphetamine, is a member of the amphetamine drug class with stimulant and psychedelic properties. It also acts as an entheogen and an entactogen. MMDA bears resemblance to the psychopharmacologically active essential oils elemicin and myristicin found in nutmeg. The effects of MMDA includes feelings of euphoria and warmth, as well as realistic closed-eye visua…	HTR2A,SLC6A3,SLC6A4,SLC6A2,SLC18A2,SLC18A1,MAOA,MAOB
D-leucyl-N-(3-chlorobenzyl)-L-prolinamide	2	DB06911	-6.41749	0.24259	5.94549	351.878	5.8136	2257	3842	1416	1060	1899.39	2272	2307.02	2797	NA	F2
Clofazimine	3	DB00845	-7.67428	0.42724	7.26626	473.407	5.81358	676	2636	18	1061	429.507	156	317.728	125	A fat-soluble riminophenazine dye used for the treatment of leprosy. It has been used investigationally in combination with other antimycobacterial drugs to treat Mycobacterium avium infections in AIDS patients. Furthermore, the agent is also known to possess a relatively strong anti-inflammatory effect that has been employed to manage erythema nodosum leprosum. (From AMA Drug Evaluations Annual,…	Not-Available,GK0582
(3ASR,4RS,8ASR,8BRS)-4-(2-(4-FLUOROBENZYL)-1,3-DIOXODEACAHYDROPYRROLO[3,4-A]-PYRROLIZIN-4-YL)BENZAMIDINE	2	DB07796	-7.72607	0.10885	5.90942	407.469	5.81343	635	4386	1485	1062	1447.68	1489	1605.18	1712	NA	F2
Cilazapril	1	DB01340	-6.93906	0.24449	6.07392	417.506	5.81299	1557	3831	1160	1063	1646.83	1852	1905.55	2174	Cilazapril is an ACE inhibtor class drug used in the treatment of hypertension and heart failure. It belongs to the angiotensin-converting enzyme inhibitors (ACE inhibitors) class of drugs. It is a prodrug that is hydrolyzed after absorption to its main metabolite cilazaprilat. It is branded as Inhibace in Canada and other countries, Vascace and Dynorm in a number of European countries, among man…	ACE
(2S)-1-(1H-INDOL-3-YL)-3-{[5-(3-METHYL-1H-INDAZOL-5-YL)PYRIDIN-3-YL]OXY}PROPAN-2-AMINE	0	DB08073	-8.48529	0.41455	6.84254	397.482	5.81249	205	2732	146	1064	543.103	239	434.039	221	NA	AKT2,GSK3B,PRKACA,PKIA
(2R)-1-(2,6-dimethylphenoxy)propan-2-amine	2	DB07129	-5.10313	0.37995	4.26096	179.263	5.81244	3513	2959	3629	1065	2517.62	3282	3353.8	4110	NA	PLAU
(5-CHLORO-2-{[(3-NITROBENZYL)AMINO]CARBONYL}PHENOXY)ACETIC-ACID	0	DB07030	-7.01919	0.49448	5.41614	364.741	5.81233	1426	2133	2366	1066	1664.26	1879	1930.67	2214	NA	AKR1B1
N-{3-[(7ar,12as,12bs)-7-Oxo-1,3,4,6,7,7a,12a,12b-Octahydroindolo[2,3-a]Quinolizin-12(2h)-Yl]Propyl}Propane-2-Sulfonamide	4	DB01967	-7.08839	0.42938	6.5779	403.548	5.81229	1318	2615	359	1067	1071.92	890	1073.56	924	NA	zipA,zipA
Doxorubicin	4	DB00997	-9.03057	0.3875	6.0269	543.525	5.81203	63	2906	1241	1068	701.851	398	610.196	393	Doxorubicin is a cytotoxic anthracycline antibiotic isolated from cultures of Streptomyces peucetius var. caesius. Doxorubicin binds to nucleic acids, presumably by specific intercalation of the planar anthracycline nucleus with the DNA double helix.	Not-Available,TOP2A
3-Fluorotyrosine	0	DB04436	-5.64175	0.19145	4.2182	199.181	5.81178	3090	4088	3656	1069	2650.72	3484	3587.77	4319	3-Fluoro-L-tyrosine is a solid. This compound belongs to the phenylpropanoic acids. These are compounds whose structure contain a benzene ring conjugated to a propanoic acid. 3-Fluoro-L-tyrosine targets the protein superoxide dismutase [mn], mitochondrial.	SOD2
(3,3-dimethylpiperidin-1-yl)(6-(3-fluoro-4-methylphenyl)pyridin-2-yl)methanone	2	DB06992	-7.62933	0.51724	6.07532	326.415	5.81108	725	1964	1155	1070	1151.76	1007	1180.38	1063	NA	HSD11B1
Iohexol	0	DB01362	-6.7992	0.09238	5.80643	821.141	5.81092	1763	4416	1679	1071	1934.33	2336	2355.65	2862	Iohexol is an effective non-ionic, water-soluble contrast agent which is used in myelography, arthrography, nephroangiography, arteriography, and other radiographic procedures. Its low systemic toxicity is the combined result of low chemotoxicity and low osmolality.	NA
Cysteine-S-Acetamide	5	DB02987	-3.71857	0.51963	3.91938	178.213	5.8108	4221	1936	3861	1072	2411.59	3114	3159.9	3917	NA	OAS1,RNASE1
P-Anisic-Acid	3	DB02795	-4.65645	0.41469	3.39216	152.149	5.81029	3804	2730	4218	1073	2618.35	3440	3525.09	4268	NA	PLA2G1B,PLA2G2E
AMPA	1	DB02057	-5.10516	0.38132	3.86187	186.167	5.81007	3510	2945	3906	1074	2566.15	3360	3430.64	4183	AMPA is a specific agonist for the AMPA receptor.	GRIA2
THYMIDINE-5'-THIOPHOSPHATE	0	DB08432	-6.75547	0.60638	5.08743	338.278	5.81006	1823	1327	2828	1075	1646.78	1851	1898.36	2159	NA	polA
N-Hydroxy-4-[(4-Methoxylphenyl)Sulfonyl]-2,2-Dimethyl-Hexahydro-1,4-Thiazepine-3(S)-Carboxamide	2	DB02350	-6.45155	0.39303	5.79457	374.484	5.80956	2215	2872	1699	1076	1846.68	2194	2210.98	2656	NA	MMP3
(21S)-1AZA-4,4-DIMETHYL-6,19-DIOXA-2,3,7,20-TETRAOXOBICYCLO[19	3	DB08520	-7.8348	0.53741	6.28522	437.577	5.80947	533	1825	754	1077	942.745	682	901.821	729	NA	FKBP1A
N-(R-Carboxy-Ethyl)-Alpha-(S)-(2-Phenylethyl)	0	DB02505	-7.03735	0.12803	6.17362	592.784	5.80912	1399	4329	944	1078	1575.61	1716	1788.1	1989	NA	Not-Available
3-(2-aminoquinazolin-6-yl)-4-methyl-1-[3-(trifluoromethyl)phenyl]pyridin-2(1H)-one	0	DB07528	-8.92153	0.26277	6.44227	396.372	5.80792	77	3735	530	1079	636.824	339	534.178	309	NA	KDR
4-{[5-(CYCLOHEXYLAMINO)[1,2,4]TRIAZOLO[1,5-A]PYRIMIDIN-7-YL]AMINO}BENZENESULFONAMIDE	8	DB07686	-6.9802	0.3035	6.45497	387.469	5.80684	1496	3485	513	1080	1303.67	1247	1388.09	1376	NA	CDK2
N-[5-(1,1-DIOXIDOISOTHIAZOLIDIN-2-YL)-1H-INDAZOL-3-YL]-2-(4-PIPERIDIN-1-YLPHENYL)ACETAMIDE	1	DB07220	-7.88583	0.10054	6.34123	453.568	5.80663	505	4401	661	1081	1122.58	967	1136.79	996	NA	CDK2
3-(1H-tetrazol-5-ylamino)cyclohex-2-en-1-one	1	DB07865	-5.25129	0.86357	5.17826	179.183	5.80659	3406	170	2715	1082	1142.02	996	1162.75	1032	NA	blaCTX-M-9a
Clemastine	0	DB00283	-6.59613	0.4524	5.59669	343.898	5.80645	2036	2447	2076	1083	1829.43	2160	2178.78	2609	An ethanolamine-derivative, first generation histamine H1 antagonist used in hay fever, rhinitis, allergic skin conditions, and pruritus. It causes drowsiness.	HRH1
D-phenylalanyl-N-(3-fluorobenzyl)-L-prolinamide	0	DB07027	-7.56896	0.2773	5.91071	369.44	5.806	771	3642	1483	1084	1457.61	1509	1608.84	1721	NA	F2
2-(CYCLOHEXYLMETHYLAMINO)-4-(PHENYLAMINO)PYRAZOLO[1,5-A][1,3,5]TRIAZINE-8-CARBONITRILE	2	DB08353	-6.48959	0.57723	6.77678	347.426	5.80545	2176	1533	191	1085	911.835	640	860.488	677	NA	CSNK2A1
4-Methyl-1,2-Benzenediol	4	DB04120	-4.44875	0.81951	3.99256	124.139	5.80527	3924	262	3814	1086	1436.52	1461	1576.9	1673	NA	cobT,catA
Phosphoric-Acid-Mono-[3-Fluoro-5-(5-Methyl-2,4-Dioxo-3,4-Dihydro-2h-Pyrimidin-1-Yl)-Tetrahyro-Furan-2-Ylmethyl]-Ester	2	DB03195	-6.76842	0.80798	5.4264	324.201	5.80494	1806	306	2354	1087	1090.48	923	1091.65	945	NA	DTYMK
4-(2-aminoethyl)-2-ethylphenol	5	DB07346	-4.95695	0.68866	4.40907	165.236	5.80455	3609	854	3479	1088	1848.13	2199	2205.12	2649	NA	BACE1
2-(4-ETHYLPIPERAZIN-1-YL)-4-(PHENYLAMINO)PYRAZOLO[1,5-A][1,3,5]TRIAZINE-8-CARBONITRILE	4	DB08360	-6.34436	0.58688	6.27764	348.414	5.80411	2353	1472	768	1089	1304.61	1249	1385.58	1367	NA	CSNK2A1
METHYL-N-[(2S,3R)-3-AMINO-2-HYDROXY-3-(4-ISOPROPYLPHENYL)PROPANOYL]-D-ALANYL-D-LEUCINATE	1	DB08670	-6.57873	0.17447	5.76651	421.538	5.8039	2061	4145	1758	1090	2011.46	2470	2467.22	3026	NA	map
4-methyl-7,8-dihydro-5H-thiopyrano[4,3-d]pyrimidin-2-amine	0	DB08194	-5.29563	0.79663	4.68976	181.264	5.8037	3369	346	3217	1091	1422.21	1441	1553.61	1635	NA	HSP90AA1
5-Chloro-1h-Indole-2-Carboxylic-Acid{[Cyclopentyl-(2-Hydroxy-Ethyl)-Carbamoyl]-Methyl}-Amide	2	DB03288	-6.95659	0.4946	5.76825	365.861	5.80363	1527	2132	1754	1092	1580.23	1726	1787.39	1987	NA	PYGL
2-[1-(4-CHLOROBENZOYL)-5-METHOXY-2-METHYL-1H-INDOL-3-YL]-N-[(1S)-1-(HYDROXYMETHYL)PROPYL]ACETAMIDE	0	DB07984	-7.60073	0.30887	6.32955	428.916	5.80357	749	3449	684	1093	1178.86	1047	1208.96	1109	NA	PTGS1
2-(6-CHLORO-3-{[2,2-DIFLUORO-2-(2-PYRIDINYL)ETHYL]AMINO}-2-OXO-1(2H)-PYRAZINYL)-N-[(2-FLUORO-6-PYRIDINYL)METHYL]ACETAMIDE	0	DB07548	-7.11333	0.41602	6.75881	432.406	5.80272	1281	2722	199	1094	933.42	668	885.313	703	NA	F2
D-phenylalanyl-N-(3-chlorobenzyl)-L-prolinamide	8	DB06919	-6.85933	0.38319	5.83342	385.895	5.80221	1669	2936	1620	1095	1717.06	1965	1994.84	2306	NA	F2
Tetrabenazine	0	DB04844	-6.89535	0.50585	6.10484	317.429	5.80179	1618	2047	1082	1096	1407.78	1415	1530.29	1593	A drug formerly used as an antipsychotic but now used primarily in the symptomatic treatment of various hyperkinetic disorders. It is a monoamine depletor and used as symptomatic treatment of chorea associated with Huntington's disease. FDA approved on August 15, 2008.	SLC18A2
Glipizide	0	DB01067	-7.5212	0.5546	6.09861	445.545	5.80173	813	1707	1099	1097	1137.32	986	1151.08	1019	Glipizide is an oral hypoglycemic agent in the second-generation sulfonylurea drug class that is used to control blood sugar levels in patients with type 2 diabetes mellitus. It was first introduced in 1984 [A179491] and is available in various countries including Canada and the U.S. According to the 2018 Clinical Practice Guidelines by Diabetes Canada, sulfonylurea drugs are considered a second-…	ABCC8,PPARG
{1-[2-(1-FORMYL-PROPYL)-3-METHANESULFONYLAMINO-PYRROLIDINE-1-CARBONYL]-2-METHYL-PROPYL}-CARBAMIC-ACID-TERT-BUTYL-ESTER	1	DB08644	-6.33544	0.38658	6.45063	433.571	5.80124	2365	2916	518	1098	1407.3	1414	1528.68	1591	NA	Not-Available
Epirubicin	6	DB00445	-8.98435	0.48524	6.06228	543.525	5.80085	69	2207	1186	1099	667.473	363	565.256	342	An anthracycline which is the 4&#39;-epi-isomer of doxorubicin. The compound exerts its antitumor effects by interference with the synthesis and function of DNA.	CHD1,TOP2A,Not-Available
2-(2f-Benzothiazolyl)-5-Styryl-3-(4f-Phthalhydrazidyl)Tetrazolium-Chloride	0	DB01897	-9.14445	0.22239	6.63709	466.506	5.80029	50	3948	298	1100	504.358	210	388.915	185	NA	HPGDS
Rimantadine	0	DB00478	-6.27332	0.42839	4.87461	179.307	5.80001	2445	2628	3074	1101	2159.48	2713	2703.15	3380	An RNA synthesis inhibitor that is used as an antiviral agent in the prophylaxis and treatment of influenza.	M
5-[3-(2-METHOXYPHENYL)-1H-PYRROLO[2,3-B]PYRIDIN-5-YL]-N,N-DIMETHYLPYRIDINE-3-CARBOXAMIDE	0	DB08350	-8.26779	0.93898	6.79399	372.428	5.8	282	33	180	1102	207.279	40	118.762	25	NA	ABL1
Tert-Butyloxycarbonyl-Group	0	DB02768	-3.15374	0.65277	2.93047	102.133	5.79941	4361	1046	4428	1103	2172.58	2736	2723.38	3414	NA	gag-pol
Sibutramine	1	DB01105	-6.13961	0.67612	5.94509	279.855	5.799	2593	916	1418	1104	1388.63	1379	1498.96	1541	Sibutramine (trade name Meridia in the USA, Reductil in Europe and other countries), usually as sibutramide hydrochloride monohydrate, is an orally administered agent for the treatment of obesity. It is a centrally acting stimulant chemically related to amphetamines thus it is classified as a Schedule IV controlled substance in the United States. In October 2010, Sibutramine was withdrawn from Ca…	SLC6A2,SLC6A4,SLC6A3
Cephaloglycin	0	DB00689	-7.26692	0.27519	5.35105	405.432	5.79899	1096	3654	2465	1105	1817.35	2139	2145.19	2559	A cephalorsporin antibiotic that is no longer commonly used.	pbpA
2-Amino-P-Cresol	0	DB04533	-4.74904	0.61345	3.52164	123.155	5.79884	3744	1277	4122	1106	2160.71	2715	2701.13	3375	NA	cobT
(3AS,4R,9BR)-4-(4-HYDROXYPHENYL)-1,2,3,3A,4,9B-HEXAHYDROCYCLOPENTA[C]CHROMEN-8-OL	1	DB07933	-7.96358	0.56625	5.83698	282.339	5.7986	448	1623	1612	1107	1067.28	882	1054.36	907	Erteberel is an estrogen receptor beta agonist that has been used in trials studying the treatment of Benign Prostatic Hyperplasia.	ESR2,ESR1
1-[4-Carboxy-2-(3-Pentylamino)Phenyl]-5,5'-Di(Hydroxymethyl)Pyrrolidin-2-One	5	DB03475	-6.11003	0.23154	5.19325	350.415	5.79835	2628	3894	2697	1108	2351.58	3018	3022.04	3772	NA	NA
Heptanamide	0	DB02641	-4.05937	0.7893	4.18855	129.203	5.79834	4106	370	3674	1109	1577.33	1720	1773.86	1960	NA	limA
3-bromo-5-phenyl-N-(pyridin-4-ylmethyl)pyrazolo[1,5-a]pyrimidin-7-amine	0	DB07210	-7.01821	0.28865	6.00792	380.249	5.79831	1428	3578	1284	1110	1642.72	1841	1872.02	2126	NA	CDK2
Benzoic-Acid	3	DB03793	-4.43254	0.49165	3.04274	122.123	5.7978	3933	2158	4384	1111	2535.65	3307	3338.48	4095	A fungistatic compound that is widely used as a food preservative. It is conjugated to GLYCINE in the liver and excreted as hippuric acid. As the sodium salt form, sodium benzoate is used as a treatment for urea cycle disorders due to its ability to bind amino acids. This leads to excretion of these amino acids and a decrease in ammonia levels. Recent research shows that sodium benzoate may be be…	nfnB,chqB,repA,PRDX5,eltB,cocE,oxyR,malT,pptA,DAO,HRSP12,clcA,RAB9A,cumD,cpo
EPIBATIDINE	0	DB07720	-5.68715	0.83433	5.11361	208.692	5.79768	3054	232	2790	1112	1217.63	1102	1255.03	1180	NA	CHRFAM7A
2-[4-(DIMETHYLAMINO)PHENYL]-6-HYDROXY-3-METHYL-1,3-BENZOTHIAZOL-3-IUM	0	DB08615	-6.75478	0.33288	5.51515	285.392	5.79709	1824	3299	2216	1113	1962.76	2383	2371.33	2879	NA	ACHE
2-Phenylamino-Ethanesulfonic-Acid	3	DB02283	-4.74573	0.37445	4.28103	201.247	5.79667	3747	2984	3612	1114	2589.88	3401	3430.92	4184	NA	ccpA
Alpha-L-Arabinose	0	DB03142	-4.81538	0.58367	2.84995	150.13	5.79633	3700	1497	4451	1115	2289.75	2913	2910.45	3626	NA	araC,araF,galM
Foscarnet	0	DB00529	-3.52723	0.34612	2.45584	126.004	5.79576	4281	3214	4496	1116	2882.51	3784	3954.93	4473	An antiviral agent used in the treatment of cytomegalovirus retinitis. Foscarnet also shows activity against human herpes viruses and HIV.	UL54,UL30
Dopamine	0	DB00988	-5.24421	0.58297	3.7883	153.181	5.79473	3414	1501	3951	1117	2180.73	2751	2725.53	3416	One of the catecholamine neurotransmitters in the brain. It is derived from tyrosine and is the precursor to norepinephrine and epinephrine. Dopamine is a major transmitter in the extrapyramidal system of the brain, and important in regulating movement. A family of receptors (receptors, dopamine) mediate its action.	DRD2,DRD1,DRD5,DRD3,DRD4,SLC6A3,DBH
(S)-Mandelic-Acid	3	DB03357	-4.76982	0.73173	3.71798	152.149	5.79432	3732	621	3979	1118	1791.89	2090	2097.02	2467	NA	mdlA
(R)-Mandelic-Acid	5	DB03357	-4.64168	0.73684	3.66598	152.149	5.79432	3809	598	4015	1119	1788.57	2083	2091.22	2457	NA	mdlA
N2-({[(4-Bromophenyl)Methyl]Oxy}Carbonyl)-N1-[(1s)-1-Formylpentyl]-L-Leucinamide	8	DB04234	-5.47806	0.22742	5.70127	441.366	5.79432	3241	3917	1884	1120	2275.01	2894	2881.19	3594	NA	CTSK
6-chloro-N-pyrimidin-5-yl-3-{[3-(trifluoromethyl)phenyl]amino}-1,2-benzisoxazole-7-carboxamide	0	DB07326	-8.48499	0.57778	6.638	433.777	5.79427	206	1531	296	1121	568.768	265	453.64	237	NA	KDR
Cysteine-Methylene-Carbamoyl-1,10-Phenanthroline	0	DB04437	-7.05524	0.60006	6.19465	356.407	5.79385	1369	1379	896	1122	1173.73	1039	1191.49	1080	NA	NA
(S)-4-ISOPROPOXYCARBONYL-6-METHOXY-3-METHYLTHIOMETHYL-3,4-DIHYDROQUINOXALIN-2(1H)-THIONE	2	DB07885	-5.49837	0.54282	5.81956	340.47	5.79374	3225	1798	1645	1123	1809.12	2120	2120.78	2509	Talviraline has been used in trials studying the treatment of HIV Infections.	gag-pol
2-[5-Methanesulfonylamino-2-(4-Aminophenyl)-6-Oxo-1,6-Dihydro-1-Pyrimidinyl]-N-(3,3,3-Trifluoro-1-Isopropyl-2-Oxopropyl)Acetamide	8	DB03202	-6.43324	0.13903	6.29607	489.476	5.79348	2237	4294	739	1124	1680.68	1906	1921.87	2195	NA	CELA1
[2-Amino-6-(2,6-Difluoro-Benzoyl)-Imidazo[1,2-a]Pyridin-3-Yl]-Phenyl-Methanone	0	DB04006	-8.2359	0.94644	6.8571	377.35	5.79331	297	22	140	1125	179.108	34	97.0739	16	NA	CDK2
(S)-2-CHLORO-N-(1-(2-(2-HYDROXYETHYLAMINO)-2-OXOETHYL)-2-OXO-1,2,3,4-TETRAHYDROQUINOLIN-3-YL)-6H-THIENO[2,3-B]PYRROLE-5-CARBOXAMIDE	0	DB07792	-7.55991	0.49023	6.27553	446.916	5.7922	779	2169	774	1126	1101.59	937	1093.57	950	NA	PYGM
Apstatin	2	DB04092	-6.95256	0.32595	6.49354	459.547	5.7916	1538	3342	462	1127	1279.03	1208	1334.14	1296	NA	pepP
GUANOSINE-2',3'-O-ETHYLIDENEPHOSPHONATE	2	DB04754	-7.14882	0.72357	5.38808	389.261	5.79137	1240	663	2397	1128	1221.03	1106	1253.72	1175	NA	PNP
3-PYRIDIN-4-YL-2,4-DIHYDRO-INDENO[1,2-	1	DB08569	-8.1075	0.32451	6.50139	437.341	5.79125	361	3354	453	1129	887.086	614	818.571	620	NA	PRKACA,PKIA
3,8-Diamino-6-Phenyl-5-[6-[1-[2-[(1,2,3,4-Tetrahydro-9-Acridinyl)Amino]Ethyl]-1h-1,2,3-Triazol-4-Yl]Hexyl]-Phenanthridinium	5	DB02226	-7.80951	0.093	7.13353	661.878	5.79081	552	4413	39	1130	572.406	271	456.295	241	NA	ACHE
5-(3-(2,6-DICHLORO-4-(4,5-DIHYDRO-2-OXAZOLYL)PHENOXY)PROPYL)-3-METHYL-ISOXAZOLE	0	DB08728	-6.6286	0.37562	6.27719	355.221	5.78993	2000	2977	772	1131	1509.98	1599	1662.68	1796	5-(3-(2,6-dichloro-4-(4,5-dihydro-2-oxazolyl)phenoxy)propyl)-3-methyl isoxazole is a solid. This compound belongs to the phenol ethers. These are aromatic compounds containing an ether group substituted with a benzene ring. Known drug targets of 5-(3-(2,6-dichloro-4-(4,5-dihydro-2-oxazolyl)phenoxy)propyl)-3-methyl isoxazole include genome polyprotein.	Not-Available,Not-Available
Cathine	6	DB01486	-4.62508	0.44935	3.63643	151.209	5.78949	3818	2468	4045	1132	2562.93	3352	3365.37	4121	Cathine, also known as d-norpseudoephedrine and (+)-norpseudoephedrine, is a psychoactive drug with stimulant properties. It belongs to the phenethylamine and amphetamine chemical classes. In the United States, it is classified as a Schedule IV controlled substance.	NA
2-Methoxy-4-Vinyl-Phenol	1	DB03514	-4.72804	0.73052	4.1188	150.177	5.78898	3757	629	3726	1133	1777.22	2061	2064.96	2406	NA	NA
N-({6-[(4-CYANO-2-FLUOROBENZYL)OXY]NAPHTHALEN-2-YL}SULFONYL)-D-GLUTAMIC-ACID	1	DB08112	-7.65314	0.22515	6.13591	486.477	5.78867	702	3931	1011	1134	1333.68	1286	1407.77	1402	NA	murD
4-(BENZHYDRYLOXY)-1-[3-(1H-TETRAAZOL-5-YL)PROPYL]PIPERIDINE	0	DB07917	-7.29001	0.23069	5.56512	377.492	5.78825	1056	3897	2128	1135	1775.58	2058	2061.21	2397	NA	HPGDS
Pyruvic-acid	6	DB00119	-2.73228	0.70985	2.78095	88.062	5.78805	4429	735	4474	1136	2016.82	2475	2442.1	2993	An intermediate compound in the metabolism of carbohydrates, proteins, and fats. In thiamine deficiency, its oxidation is retarded and it accumulates in the tissues, especially in nervous structures. (From Stedman, 26th ed)	ABAT,SLC16A4,SLC16A8,SLC16A1,PC,SLC16A3,SLC16A2,AGXT2,SLC16A5,PKLR,SLC16A6,SLC16A7,PDHB,PKM2
N-(TERT-BUTYL)-3,5-DIMETHYL-N'-[(5-METHYL-2,3-DIHYDRO-1,4-BENZODIOXIN-6-YL)CARBONYL]BENZOHYDRAZIDE	3	DB07929	-6.83715	0.36685	6.23689	396.487	5.78771	1697	3057	828	1137	1486.59	1561	1625.56	1749	NA	NR1H3,RXRB
2-{[(6-OXO-1,6-DIHYDROPYRIDIN-3-YL)METHYL]AMINO}-N-[4-PROPYL-3-(TRIFLUOROMETHYL)PHENYL]BENZAMIDE	0	DB07831	-7.73682	0.58908	6.80921	429.442	5.78534	624	1452	165	1138	642.236	344	530.736	305	NA	ABL1
Crotonaldehyde	1	DB04381	-2.60227	0.74611	3.19082	70.091	5.78457	4443	546	4331	1139	1859.92	2217	2190.21	2628	NA	ALDH2
Nefazodone	7	DB01149	-6.37808	0.21542	6.41474	470.017	5.78411	2318	3974	569	1140	1563.47	1695	1737.07	1900	Nefazodone hydrochloride (trade name Serzone) is an antidepressant drug marketed by Bristol-Myers Squibb. Its sale was discontinued in 2003 in some countries, due to the small possibility of hepatic (liver) injury. Drug-induced hepatic injuries were associated with an risk of elevated need for a liver transplant, or even death, with the incidence of severe liver damage was shown to be approximate…	HTR2A,HTR2C,SLC6A4,HTR1A,SLC6A2,SLC6A3,ADRA1B,ADRA2A,ADRA1A
Allosamidin	3	DB04628	-7.90293	0.21085	4.93489	622.625	5.78367	486	3988	3006	1141	1605.71	1771	1799.4	2007	Allosamidin exhibits extremely potent inhibitory activity against chitinases from a number of sources, particularly from <i>Candida albicans</i>, and can be utilized as potent antifungal agent.	chiB,chiA
Griseofulvin	2	DB00400	-6.87455	0.69216	5.97012	352.77	5.78299	1648	827	1367	1142	1207.74	1086	1230.49	1136	An antifungal antibiotic. Griseofulvin may be given by mouth in the treatment of tinea infections.	TUB2,TUB1,KRT12
(METHYLPYRIDAZINE-PIPERIDINE-BUTYLOXYPHENYL)ETHYLACETATE	2	DB08014	-6.31859	0.10743	5.827	397.519	5.78299	2389	4390	1633	1143	2103.43	2620	2577.64	3181	NA	Not-Available,Not-Available
10-Propargyl-5,8-Dideazafolic-Acid	4	DB03541	-7.01068	0.14643	5.67464	477.477	5.78286	1440	4264	1937	1144	1920.59	2316	2282.63	2775	NA	THYA,thyA,thyA,NQO2,TYMS,DHRS4L1
Fluoro-Phosphite-Ion	2	DB02348	-2.53726	0.53169	2.56067	97.969	5.78271	4450	1861	4494	1145	2554.97	3340	3338.72	4096	NA	PYGM
N~2~-(biphenyl-4-ylsulfonyl)-N-hydroxy-N~2~-(2-hydroxyethyl)glycinamide	0	DB08029	-7.51842	0.65422	5.77932	350.396	5.78256	816	1036	1733	1146	1138.3	990	1135.75	995	NA	MMP3
N-{3-[(5-chloro-1H-pyrrolo[2,3-b]pyridin-3-yl)carbonyl]-2,4-difluorophenyl}propane-1-sulfonamide	1	DB06999	-7.25369	0.3562	6.66234	413.833	5.78225	1111	3134	275	1147	1023.71	805	985.633	829	NA	BRAF
Darifenacin	1	DB00496	-7.32675	0.46915	7.04538	426.56	5.78225	1015	2322	54	1148	618.253	311	503.007	280	"Darifenacin (Enablex庐, Novartis) is a medication used to treat urinary incontinence.	CHRM3,CHRM1,CHRM2,CHRM4,CHRM5
Pentanedial	4	DB03266	-2.87118	0.52806	3.50853	100.117	5.78191	4411	1882	4137	1149	2506.34	3266	3250.48	4016	One of the protein CROSS-LINKING REAGENTS that is used as a disinfectant for sterilization of heat-sensitive equipment and as a laboratory reagent, especially as a fixative.	NA
Apramycin	3	DB04626	-8.70678	0.33268	5.29146	539.583	5.7811	135	3301	2555	1150	1069.71	886	1044.22	897	Apramycin is an aminoglycoside antibiotic and has a bactericidal action against many gram-negative bacteria. Apramycin is a structurally unique antibiotic that contains a bicyclic sugar moiety and a monosubstituted deoxystreptamine. It is not approved for use in humans.	Not-Available
1-[2-HYDROXY-3-(4-CYCLOHEXYL-PHENOXY)-PROPYL]-4-(2-PYRIDYL)-PIPERAZINE	0	DB08543	-7.39494	0.26213	6.03783	395.547	5.78082	945	3741	1217	1151	1491.75	1575	1626.43	1751	NA	Not-Available
3,4-Methylenedioxymethamphetamine	0	DB01454	-5.32448	0.7125	4.76254	193.246	5.78051	3350	722	3165	1152	1723.26	1976	1970.84	2276	An N-substituted amphetamine analog. It is a widely abused drug classified as a hallucinogen and causes marked, long-lasting changes in brain serotonergic systems. It is commonly referred to as MDMA or ecstasy. It is a widely abused drug classified as a hallucinogen and causes marked, long-lasting changes in brain serotonergic systems.	SLC6A4,SLC18A2,SLC6A3,HTR2A,HTR2B,HTR2C,SLC6A2
2,3-Dimethylimidazolium-Ion	0	DB03789	-3.24214	0.57341	3.56511	97.141	5.78035	4337	1574	4097	1153	2382.99	3077	3035.43	3785	NA	NA
Zalcitabine	2	DB00943	-5.73793	0.80426	4.82986	211.221	5.77998	3008	314	3107	1154	1356.56	1321	1431.69	1441	A dideoxynucleoside compound in which the 3'-hydroxyl group on the sugar moiety has been replaced by a hydrogen. This modification prevents the formation of 5' to 3' phosphodiester linkages, which are needed for the elongation of DNA chains, thus resulting in the termination of viral DNA growth. The compound is a potent inhibitor of HIV replication at low concentrations, acting as a chain-termina…	Not-Available
Phenol	0	DB03255	-3.95832	0.75082	3.10461	94.113	5.7796	4144	520	4361	1155	1815.09	2132	2110.26	2486	Phenol is an antiseptic and disinfectant. It is active against a wide range of micro-organisms including some fungi and viruses, but is only slowly effective against spores. Phenol has been used to disinfect skin and to relieve itching. Phenol is also used as an oral analgesic or anesthetic in products such as Chloraseptic to treat pharyngitis. Additionally, phenol and its related compounds are u…	nprS,E,cobT
1-{[(3R)-3-methyl-4-({4-[(1S)-2,2,2-trifluoro-1-hydroxy-1-methylethyl]phenyl}sulfonyl)piperazin-1-yl]methyl}cyclopropanecarboxamide	2	DB07624	-6.71417	0.42759	6.26041	449.495	5.7778	1884	2635	793	1156	1460.57	1516	1578.99	1677	NA	HSD11B1
2,4,6-Tribromophenol	4	DB02417	-4.24865	0.58669	4.6351	330.801	5.77747	4023	1474	3271	1157	2176.53	2745	2686.85	3353	NA	NA
6-[(Z)-Amino(Imino)Methyl]-N-[4-(Aminomethyl)Phenyl]-4-(Pyrimidin-2-Ylamino)-2-Naphthamide	1	DB03082	-7.94638	0.06685	6.03612	411.469	5.77729	458	4468	1224	1158	1305.02	1250	1358.06	1321	NA	PLAU
(3r)-4-(P-Toluenesulfonyl)-1,4-Thiazane-3-Carboxylicacid-L-Leucine	1	DB04012	-6.53484	0.24522	5.88333	414.549	5.77571	2123	3828	1533	1159	1949.34	2362	2318.22	2812	NA	FKBP1A
Alpha-Ketomalonic-Acid	0	DB03589	-3.5778	0.51672	2.90455	118.044	5.7757	4264	1968	4437	1160	2563.58	3354	3339.21	4097	NA	ME2
METHYL-4-{[({[(2R,5S)-5-{[(2S)-2-(AMINOMETHYL)PYRROLIDIN-1-YL]CARBONYL}PYRROLIDIN-2-YL]METHYL}AMINO)CARBONYL]AMINO}BENZOATE	0	DB07328	-6.98601	0.29115	5.80472	403.483	5.77525	1481	3555	1684	1161	1791.19	2089	2069.72	2415	NA	DPP4
Levallorphan	4	DB00504	-8.13163	0.49599	6.14147	283.415	5.77525	350	2125	1002	1162	964.662	714	906.633	739	An opioid antagonist with properties similar to those of naloxone; in addition it also possesses some agonist properties. It should be used cautiously; levallorphan reverses severe opioid-induced respiratory depression but may exacerbate respiratory depression such as that induced by alcohol or other non-opioid central depressants. (From Martindale, The Extra Pharmacopoeia, 30th ed, p683)	OPRM1
Cefditoren	1	DB01066	-7.31754	0.12377	6.14911	506.591	5.77488	1027	4342	988	1163	1504.52	1587	1639.35	1771	Cefditoren is an oral third-generation cephalosporin. It is commonly marketed under the trade name Spectracef by Cornerstone BioPharma.	penA,pbpA
2-[4-(2H-1,4-BENZOTHIAZINE-3-YL)-PIPERAZINE-1-LY]-1,3-THIAZOLE-4-CARBOXYLIC-ACID-ETHYLESTER	3	DB08540	-6.41727	0.28211	5.74766	388.518	5.77436	2258	3609	1801	1164	2033.03	2501	2448.36	2998	NA	Not-Available
(S)-2-[(R)-3-amino-4-(2-fluorophenyl)butyryl]-1,2,3,4-tetrahydroisoquinoline-3-carboxamide	1	DB04578	-7.12051	0.45035	6.26545	355.413	5.77291	1269	2462	783	1165	1299.3	1241	1347.42	1312	NA	DPP4
3-bromo-5-phenyl-N-(pyridin-3-ylmethyl)pyrazolo[1,5-a]pyrimidin-7-amine	0	DB08535	-7.06038	0.2904	6.06788	380.249	5.77106	1358	3562	1170	1166	1602.76	1765	1782.08	1975	NA	CDK2
2,2-Dimethylthiazolidine-4-Carboxylic-Acid;(Dmt)Thiazolidine	7	DB01635	-3.84699	0.47706	3.65516	161.226	5.77054	4186	2273	4026	1167	2585.75	3394	3370.99	4126	NA	NA
Raloxifene	0	DB00481	-7.74921	0.21051	6.45709	473.594	5.77023	609	3989	510	1168	1096.79	933	1074.03	927	"Raloxifene is a second generation selective estrogen receptor modulator (SERM) that mediates anti-estrogenic effects on breast and uterine tissues, and estrogenic effects on bone, lipid metabolism, and blood coagulation.[A4979,T28] Exhibiting tissue-specific effects distinct from [estradiol], raloxifene is the first of the benzothiophene group of antiestrogens to be labelled a SERM.[A4977] Avail…	ESR1,ESR2
5-CHLORO-6-METHYL-N-(2-PHENYLETHYL)-2-PYRIDIN-2-YLPYRIMIDIN-4-AMINE	7	DB07901	-6.25006	0.56461	6.52559	324.815	5.76995	2477	1629	419	1169	1185.68	1052	1191.3	1078	NA	METAP1
6-CYCLOHEXYLMETHOXY-2-(3'-CHLOROANILINO)-PURINE	7	DB07203	-6.54351	0.73014	6.86806	357.845	5.76975	2110	631	133	1170	674.664	374	561.549	339	NA	CCNA2,CDK2
Losartan	1	DB00678	-7.18523	0.30389	6.48775	422.92	5.76967	1193	3482	471	1171	1230.3	1124	1250.73	1168	Losartan is an angiotensin-receptor blocker (ARB) that may be used alone or with other agents to treat hypertension. Losartan and its longer acting metabolite, E-3174, lower blood pressure by antagonizing the renin-angiotensin-aldosterone system (RAAS); they compete with angiotensin II for binding to the type-1 angiotensin II receptor (AT1) subtype and prevents the blood pressure increasing effec…	AGTR1
2-METHYLTHIO-N6-ISOPENTENYL-ADENOSINE-5'-MONOPHOSPHATE	0	DB08185	-7.32625	0.75653	6.00351	463.453	5.76966	1016	498	1295	1172	936.117	674	868.556	686	NA	rpsR,rpsS,rpsT,rpsD,rpsE,rpsF,rpsG,rpsH,rpsI,rpsU,tuf,rpsQ,rpsT,rpsB,rpsC,rpsI,rpsS,rpsB,rpsC,rpsL,rpsJ,rpsK,rpsM,rpsZ,rpsO,rpsP,rpsQ
1-[1-(3-aminophenyl)-3-tert-butyl-1H-pyrazol-5-yl]-3-naphthalen-1-ylurea	0	DB06882	-8.07835	0.07356	5.96983	399.498	5.76934	381	4461	1368	1173	1285.1	1212	1324.79	1285	NA	SRC,MAPK14
1-(4-fluorophenyl)-N-[3-fluoro-4-(1H-pyrrolo[2,3-b]pyridin-4-yloxy)phenyl]-2-oxo-1,2-dihydropyridine-3-carboxamide	0	DB06896	-8.61932	0.25367	6.53635	458.424	5.76785	165	3782	404	1174	737.588	447	631.726	409	NA	MET
(3r,5r)-7-((1r,2r,6s,8r,8as)-2,6-Dimethyl-8-{[(2r)-2-Methylbutanoyl]Oxy}-1,2,6,7,8,8a-Hexahydronaphthalen-1-Yl)-3,5-Dihydroxyheptanoic-Acid	5	DB03785	-6.68095	0.34091	6.30141	422.562	5.76761	1926	3248	725	1175	1519.36	1615	1655.27	1789	NA	mvaA
Grepafloxacin	1	DB00365	-7.37904	0.2584	6.29652	359.401	5.76754	966	3755	735	1176	1330.67	1281	1386.62	1370	Grepafloxacin is an oral broad-spectrum quinoline antibacterial agent used to treat bacterial infections. Due to the QTc-prolonging potential, as indicated by the changes in the QT interval on the electrocardiogram, and the risk for cardiovascular adverse events, grepafloxacin was withdrawn in the United States.	gyrA,parC
(1-HYDROXY-1-PHOSPHONO-2-[1,1';3',1'']TERPHENYL-3-YL-ETHYL)-PHOSPHONIC-ACID	0	DB07404	-8.60154	0.42596	5.54053	434.321	5.76751	171	2641	2173	1177	1036.69	825	993.745	841	NA	uppS
Fosamprenavir	0	DB01319	-7.38945	0.25562	6.30012	585.616	5.76729	950	3765	728	1178	1323.4	1273	1375.75	1347	Fosamprenavir is a prodrug of amprenavir, an inhibitor of human immunodeficiency virus (HIV) protease.	HIV-1-protease
1,6-Fructose-Diphosphate-(Linear-Form)	4	DB02512	-5.34772	0.18845	3.79183	340.114	5.7667	3335	4100	3947	1179	2824.33	3713	3779.05	4427	NA	ALDOA,ALDOB
(1E)-5-(1-piperidin-4-yl-3-pyridin-4-yl-1H-pyrazol-4-yl)-2,3-dihydro-1H-inden-1-one-oxime	0	DB08553	-8.27065	0.2611	6.31576	373.46	5.7662	279	3747	706	1180	966.037	718	903.714	736	(1E)-5-(1-piperidin-4-yl-3-pyridin-4-yl-1h-pyrazol-4-yl)-2,3-dihydro-1h-inden-1-one oxime is a solid. This compound belongs to the phenylpyrazoles. These are compounds containing a phenylpyrazole skeleton, which consists of a pyrazole bound to a phenyl group. It targets the protein serine/threonine-protein kinase B-raf.	BRAF
trans-urocanic-acid	2	DB01971	-4.17227	0.5768	3.81023	138.126	5.76494	4055	1537	3934	1181	2319.73	2961	2905.14	3619	NA	hutU
2-(6-methylpyridin-2-yl)-N-pyridin-4-ylquinazolin-4-amine	1	DB07267	-7.01611	0.22898	5.99993	313.364	5.76454	1429	3910	1304	1182	1713.07	1959	1938.63	2230	NA	TGFBR1
PUROMYCIN-AMINONUCLEOSIDE-5'-MONOPHOSPHATE	2	DB04602	-6.66001	0.22917	5.02328	374.294	5.76434	1956	3909	2906	1183	2264.27	2877	2811.32	3512	NA	RPL37
methyl-(1R,2S)-2-(hydroxycarbamoyl)-1-{4-[(2-methylquinolin-4-yl)methoxy]benzyl}cyclopropanecarboxylate	6	DB07147	-7.27352	0.451	6.61681	420.465	5.76311	1080	2452	327	1184	1006.26	779	953.156	793	NA	ADAM17
9-HYDROXY-4-PHENYL-6H-PYRROLO[3,4-C]CARBAZOLE-1,3-DIONE	0	DB04608	-9.1823	0.55086	6.04471	328.327	5.76301	46	1732	1209	1185	581.25	278	458.399	249	NA	WEE1
2-Hydroxymethyl-Pyrrolidine-3,4-Diol	3	DB03411	-4.09324	0.51755	3.26939	133.147	5.76214	4088	1960	4288	1186	2526.54	3296	3250.93	4017	NA	punA
4-[(1S,2S,5S,9R)-5-(HYDROXYMETHYL)-8,9-DIMETHYL-3-OXABICYCLO[3	3	DB07087	-8.09439	0.77705	5.76141	276.376	5.76098	366	412	1766	1187	749.816	466	643.363	422	NA	ESR1,NCOA2
2[4-BROMO-2-FLUOROPHENYL)METHYL]-6-FLUOROSPIRO[ISOQUINOLINE-4-(1H),3'-PYRROLIDINE]-1,2',3,5'(2H)-TETRONE	0	DB07450	-9.31564	0.90524	7.01505	449.207	5.76071	35	85	62	1188	121.667	15	56.9237	7	NA	AKR1B1
(3S)-3-cyclopentyl-6-methyl-7-[(4-methylpiperazin-1-yl)sulfonyl]-3,4-dihydro-2H-1,2,4-benzothiadiazine-1,1-dioxide	0	DB08303	-7.61182	0.41756	6.3057	428.58	5.76045	739	2712	718	1189	1143.69	998	1128.98	986	NA	GRIA2
N4-HYDROXY-2-ISOBUTYL-N1-(9-OXO-1,8-DIAZA-TRICYCLO[10	1	DB08489	-8.25022	0.41581	6.68873	456.587	5.76036	290	2723	259	1190	702.382	399	589.181	373	NA	MMP7
5-chloro-N-({(5S)-2-oxo-3-[4-(3-oxomorpholin-4-yl)phenyl]-1,3-oxazolidin-5-yl}methyl)thiophene-2-carboxamide	0	DB06228	-7.81875	0.42892	5.56682	435.889	5.76034	546	2621	2124	1191	1379.37	1367	1448.57	1465	Rivaroxaban is an anticoagulant and the first orally active direct factor Xa inhibitor. Unlike warfarin, routine lab monitoring of INR is not necessary. However there is no antidote available in the event of a major bleed. Only the 10 mg tablet can be taken without regard to food. The 15 mg and 20 mg tablet should be taken with food. FDA approved on July 1, 2011.	F10
Sparfloxacin	2	DB01208	-7.115	0.18326	6.64894	392.406	5.76027	1278	4114	285	1192	1156.06	1014	1144.32	1008	Sparfloxacin is a fluoroquinolone antibiotic indicated for bacterial infections. Sparfloxacin exerts its antibacterial activity by inhibiting DNA gyrase, a bacterial topoisomerase. DNA gyrase is an essential enzyme which controls DNA topology and assists in DNA replication, repair, deactivation, and transcription.	parC,gyrA,TOP2A
Desoximetasone	0	DB00547	-9.09933	0.65152	6.38876	376.468	5.75955	55	1053	598	1193	450.851	169	325.96	136	A topical anti-inflammatory glucocorticoid used in dermatoses, skin allergies, psoriasis, etc.	NR3C1
Hydroxyethylcysteine	2	DB02413	-3.87061	0.53577	3.65463	165.214	5.75939	4173	1834	4028	1194	2463.12	3195	3135.54	3897	NA	gag-pro-pol
Glyburide	0	DB01016	-7.99163	0.55954	6.22755	494.013	5.75939	430	1670	836	1195	920.322	652	843.588	651	Glyburide is an oral antihyperglycemic agent used for the treatment of non-insulin-dependent diabetes mellitus (NIDDM). It belongs to the sulfonylurea class of insulin secretagogues, which act by stimulating &beta; cells of the pancreas to release insulin. Sulfonylureas increase both basal insulin secretion and meal-stimulated insulin release. Medications in this class differ in their dose, rate …	ABCC8,KCNJ1,KCNJ5,ABCC9,ABCB11,ABCA1,CFTR,KCNJ11
PYRIMIDINE-4,6-DICARBOXYLIC-ACID-BIS-(3-METHYL-BENZYLAMIDE)	2	DB04759	-7.44674	0.7459	6.0042	374.444	5.7587	895	547	1292	1196	932.612	667	858.402	672	NA	MMP13
Quinaldic-Acid	0	DB02428	-5.73543	0.50072	3.91317	173.171	5.75833	3012	2085	3869	1197	2322.27	2967	2896.36	3608	NA	gag-pol
4-[(10s,14s,18s)-18-(2-Amino-2-Oxoethyl)-14-(1-Naphthylmethyl)-8,17,20-Trioxo-7,16,19-Triazaspiro[5	1	DB03276	-8.89043	0.15863	6.83072	688.762	5.75824	86	4214	150	1198	505.167	211	378.816	177	NA	GRB2
1-[3,3-Dimethyl-2-(2-Methylamino-Propionylamino)-Butyryl]-Pyrrolidine-2-Carboxylic-Acid(1,2,3,4-Tetrahydro-Naphthalen-1-Yl)-Amide	3	DB02628	-7.41476	0.4111	6.84691	442.604	5.75821	926	2752	144	1199	814.442	532	715.936	507	NA	XIAP
4-{[(2,6-difluorophenyl)carbonyl]amino}-N-[(3S)-piperidin-3-yl]-1H-pyrazole-3-carboxamide	2	DB08141	-7.18028	0.51077	6.1482	349.341	5.7579	1203	2001	990	1200	1300.42	1243	1335.72	1298	NA	CDK2
3-({4-[(1E)-3-morpholin-4-yl-3-oxoprop-1-en-1-yl]-2,3-bis(trifluoromethyl)phenyl}sulfanyl)aniline	0	DB07486	-8.26376	0.25051	6.29957	476.442	5.75778	284	3798	729	1201	985.794	759	922.997	763	NA	ITGAL
5-(5-CHLORO-2-THIENYL)-N-{(3S)-1-[(1S)-1-METHYL-2-MORPHOLIN-4-YL-2-OXOETHYL]-2-OXOPYRROLIDIN-3-YL}-1H-1,2,4-TRIAZOLE-3-SULFONAMIDE	5	DB07804	-6.89797	0.69983	6.8796	488.979	5.75669	1609	785	128	1202	663.949	362	544.768	322	NA	F10
BROMAMPHENICOL	1	DB07492	-6.00672	0.29898	4.91348	412.034	5.75652	2742	3512	3034	1203	2434.87	3153	3079.97	3838	NA	draA
Ramipril	0	DB00178	-6.98145	0.14519	5.59626	416.518	5.75651	1489	4270	2078	1204	1997.09	2442	2364.05	2872	Ramipril is a prodrug belonging to the angiotensin-converting enzyme (ACE) inhibitor class of medications. It is metabolized to ramiprilat in the liver and, to a lesser extent, kidneys. Ramiprilat is a potent, competitive inhibitor of ACE, the enzyme responsible for the conversion of angiotensin I (ATI) to angiotensin II (ATII). ATII regulates blood pressure and is a key component of the renin-an…	ACE
N-[2-(1-Maleimidyl)Ethyl]-7-Diethylaminocoumarin-3-Carboxamide	0	DB02799	-7.4635	0.2222	6.18831	383.404	5.75642	868	3950	911	1205	1392.85	1384	1461.77	1489	NA	pstS
5,6-DIPHENYL-N-(2-PIPERAZIN-1-YLETHYL)FURO[2,3-D]PYRIMIDIN-4-AMINE	9	DB07297	-6.73873	0.77409	6.63598	399.498	5.75639	1847	421	300	1206	728.29	429	615.588	397	NA	LCK
4-[4-AMINO-6-(5-CHLORO-1H-INDOL-4-YLMETHYL)-[1,3,5]TRIAZIN-2-YLAMINO]-BENZONITRILE	0	DB07337	-7.9866	0.94053	7.23848	375.823	5.75586	434	31	22	1207	137.482	20	66.6435	10	NA	gag-pol
1-[1-(3-aminophenyl)-3-tert-butyl-1H-pyrazol-5-yl]-3-phenylurea	5	DB06883	-6.81637	0.34081	6.19578	349.438	5.75583	1731	3249	893	1208	1569.43	1704	1712.51	1861	NA	SRC
Travoprost	1	DB00287	-7.11102	0.33803	6.44107	500.554	5.75526	1285	3270	532	1209	1282.17	1210	1307.54	1260	Travoprost ophthalmic solution is a topical medication used for controlling the progression of glaucoma or ocular hypertension, by reducing intraocular pressure [FDA Label]. It is a synthetic prostaglandin F2alpha analog [FDA Label]. Having been a well-received therapeutic agent with demonstrated efficacy and safety, travoprost is currently approved by the US FDA as a first-line treatment for low…	PTGFR
THIENO[3,2-B]PYRIDINE-2-SULFONIC-ACID-[2-OXO-1-(1H-PYRROLO[2,3-C]PYRIDIN-2-YLMETHYL)-PYRROLIDIN-3-YL]-AMIDE	0	DB08426	-7.65067	0.16207	6.02212	427.511	5.75496	703	4203	1253	1210	1454.83	1505	1546.99	1626	NA	F10
Beta-L-Arabinose	0	DB03246	-4.82	0.57908	2.84422	150.13	5.75424	3697	1524	4454	1211	2347.91	3014	2927.71	3644	NA	araF
3,4-Methylenedioxyamphetamine	0	DB01509	-5.646	0.78123	4.63028	179.219	5.75419	3086	400	3276	1212	1487.91	1565	1593.19	1697	An amphetamine derivative that inhibits uptake of catecholamine neurotransmitters. It is a hallucinogen. It is less toxic than its methylated derivative but in sufficient doses may still destroy serotonergic neurons and has been used for that purpose experimentally. [PubChem]	NA
4-[(1R,2S)-1-ethyl-2-(4-hydroxyphenyl)butyl]phenol	4	DB07931	-6.88075	0.70718	5.9112	270.372	5.75398	1639	745	1479	1213	1216.58	1100	1217.78	1123	A synthetic estrogen that has been used as a hormonal antineoplastic agent.	AKR1C1
Perindopril	0	DB00790	-6.21134	0.26742	5.87008	368.474	5.75372	2518	3707	1555	1214	2048.83	2529	2439.32	2991	Perindopril is a nonsulfhydryl prodrug that belongs to the angiotensin-converting enzyme (ACE) inhibitor class of medications. It is rapidly metabolized in the liver to perindoprilat, its active metabolite, following oral administration. Perindoprilat is a potent, competitive inhibitor of ACE, the enzyme responsible for the conversion of angiotensin I (ATI) to angiotensin II (ATII). ATII regulate…	ACE
ONO-6818	0	DB03925	-8.24227	0.15963	6.43588	454.531	5.75339	292	4210	535	1215	945.472	685	869.64	688	NA	ELANE,CELA1
[Formylmethyl]Trimethyl-Ammonium,-N,N,N-Trimethylammonium-Acetaldehyde	9	DB04401	-2.50555	0.58195	3.36336	102.157	5.75312	4452	1507	4235	1216	2424.45	3138	3051.46	3804	NA	prr
BIA	1	DB03336	-7.87097	0.20937	5.66965	439.39	5.75294	510	3998	1950	1217	1483.15	1552	1584.22	1685	NA	COMT
N-(5-METHYL-1H-PYRAZOL-3-YL)-2-PHENYLQUINAZOLIN-4-AMINE	3	DB08454	-7.31364	0.35519	6.08686	301.353	5.75275	1034	3145	1123	1218	1452.25	1499	1539.95	1610	NA	CAMK1D
2-(5-CHLORO-2-THIENYL)-N-{(3S)-1-[(1S)-1-METHYL-2-MORPHOLIN-4-YL-2-OXOETHYL]-2-OXOPYRROLIDIN-3-YL}ETHENESULFONAMIDE	0	DB07278	-7.11257	0.37486	6.43229	447.966	5.75264	1282	2982	545	1219	1262.41	1180	1277.22	1210	NA	F2,F10
Isometheptene	3	DB06706	-3.9791	0.56348	4.31349	141.258	5.75261	4133	1640	3579	1220	2332.43	2986	2894.83	3607	Isometheptene is a sympathomimetic drug which causes vasoconstriction. It is used for treating migraines and tension headaches.	ADRA1A,SLC18A2
Ursodeoxycholic-acid	0	DB01586	-9.37545	0.74972	6.8286	392.58	5.7512	29	525	152	1221	230.557	49	132.272	31	Ursodeoxycholic acid is an epimer of [chenodeoxycholic acid]. It is a mammalian bile acid found first in the bear and is apparently either a precursor or a product of chenodeoxycholate. Its administration changes the composition of bile and may dissolve gallstones. It is used as a cholagogue and choleretic.	AKR1C2
(3ALPHA,5BETA,12ALPHA)-3,12-DIHYDROXYCHOLAN-24-OIC-ACID	3	DB03619	-8.83683	0.82997	6.97167	392.58	5.75105	102	241	80	1222	221.409	44	125.286	27	Deoxycholic acid is a a bile acid which emulsifies and solubilizes dietary fats in the intestine, and when injected subcutaneously, it disrupts cell membranes in adipocytes and destroys fat cells in that tissue. In April 2015, deoxycholic acid was approved by the FDA for the treatment submental fat to improve aesthetic appearance and reduce facial fullness or convexity. It is marketed under the b…	NA
Zk-806450	5	DB02112	-8.8732	0.15586	6.19708	489.623	5.75086	92	4230	888	1223	806.291	527	701.747	489	NA	PRSS1
Azlocillin	1	DB01061	-7.80633	0.37151	5.63379	461.5	5.74967	555	3007	2023	1224	1425.77	1444	1500.17	1545	Azlocillin is a semisynthetic ampicillin-derived acylureido penicillin.	pbpA
Bethanechol	1	DB01019	-3.77993	0.65294	4.33736	161.225	5.74945	4202	1045	3556	1225	2091.31	2597	2499.45	3068	Bethanechol is a synthetic ester structurally and pharmacologically related to acetylcholine. A slowly hydrolyzed muscarinic agonist with no nicotinic effects, bethanechol is generally used to increase smooth muscle tone, as in the GI tract following abdominal surgery or in urinary retention in the absence of obstruction. It may cause hypotension, cardiac rate changes, and bronchial spasms.	CHRM2
Repaglinide	5	DB00912	-6.70181	0.10749	5.8588	452.595	5.74922	1903	4389	1576	1226	2004.3	2455	2361.13	2866	Repaglinide is an oral antihyperglycemic agent used for the treatment of non-insulin-dependent diabetes mellitus (NIDDM). It belongs to the meglitinide class of short-acting insulin secretagogues, which act by binding to 尾 cells of the pancreas to stimulate insulin release. Repaglinide induces an early insulin response to meals decreasing postprandial blood glucose levels. It should only be taken…	ABCC8,PPARG
Cinalukast	0	DB00587	-6.63575	0.54436	6.52909	412.555	5.74921	1992	1783	414	1227	1158.97	1017	1137.14	997	Used in the treatment of asthma, cinalukast selectively antagonizes leukotriene D4 (LTD4) at the cysteinyl leukotriene receptor, CysLT1, in the human airway. Cinalukast inhibits the actions of LTD4 at the CysLT1 receptor, preventing airway edema, smooth muscle contraction, and enhanced secretion of thick, viscous mucus.	CYSLTR1
1-PHENYL-1H-PYRAZOLE-4-CARBOXYLIC-ACID	2	DB08790	-5.53215	0.49322	4.46153	188.186	5.74898	3194	2143	3434	1228	2317.87	2955	2864.52	3578	NA	HPGDS
3-cyclohexyl-D-alanyl-N-(3-chlorobenzyl)-L-prolinamide	2	DB07190	-7.2577	0.13594	6.25935	391.943	5.74836	1105	4303	794	1229	1467.66	1528	1557.11	1640	NA	F2
(5-(PYRIDIN-3-YL)FURAN-2-YL)METHANAMINE	0	DB07621	-5.35318	0.79841	4.64491	174.203	5.74803	3328	339	3261	1230	1458.51	1511	1543.75	1618	NA	CYP2A6
{[4-AMINO-2-(3-CHLOROANILINO)-1,3-THIAZOL-5-YL](4-FLUOROPHENYL)METHANONE	1	DB07489	-6.90712	0.53517	6.15534	348.81	5.74766	1599	1838	976	1231	1370.8	1350	1420.85	1430	NA	CSNK1G3
Sildenafil	0	DB00203	-7.08004	0.36748	6.47674	474.587	5.7475	1328	3055	479	1232	1243.91	1145	1247.91	1163	"In eliciting its mechanism of action, sildenafil ultimately prevents or minimizes the breakdown of cyclic guanosine monophosphate (cGMP) by inhibiting cGMP specific phosphodiesterase type 5 (PDE5) [F3850, F3853, F3856, F3859, F3883, F3886, L5611, L5614]. The result of doing so allows cGMP present in both the penis and pulmonary vasculature to elicit smooth muscle relaxation and vasodilation that…	PDE5A,PDE6G,PDE6H
4-(3,5-DIMETHYLPHENOXY)-5-(FURAN-2-YLMETHYLSULFANYLMETHYL)-3-IODO-6-METHYLPYRIDIN-2(1H)-ONE	4	DB08457	-6.329	0.6821	6.79561	481.355	5.74729	2376	890	178	1233	825.382	542	722.025	514	NA	gag-pol
Dioxaphetyl-butyrate	1	DB01475	-6.37037	0.20568	5.40636	353.462	5.74717	2326	4015	2381	1234	2288.72	2910	2812.02	3513	NA	NA
3-[(1E,7E)-8-(2,6-dioxo-1,2,3,6-tetrahydropyrimidin-4-yl)-3,6-dioxa-2,7-diazaocta-1,7-dien-1-yl]benzoic-acid	5	DB07760	-6.25966	0.29041	5.43153	346.299	5.74686	2462	3560	2349	1235	2245.55	2850	2740.78	3432	NA	UNG
Ezetimibe	0	DB00973	-8.27584	0.25648	6.20108	409.432	5.74673	273	3760	880	1236	1027.93	814	966.669	804	"Ezetimibe is a lipid-lowering compound that inhibits intestinal cholesterol and related phytosterol absorption. The discovery and research of this drug began in the early 1990's, where intravenous administration of radio-labelled compound in rats resulting in subsequent localization of the drug within enterocytes at the intestinal villus, leading to studies of investigating the effect of ezetimi…	SOAT1,NPC1L1,ANPEP
Biperiden	1	DB00810	-6.68892	0.27203	5.94426	311.469	5.7461	1916	3678	1419	1237	1875.38	2234	2154.42	2575	A muscarinic antagonist that has effects in both the central and peripheral nervous systems. It has been used in the treatment of arteriosclerotic, idiopathic, and postencephalitic parkinsonism. It has also been used to alleviate extrapyramidal symptoms induced by phenothiazine derivatives and reserpine.	CHRM1,CHRNA2
2-Aminophenol	5	DB01726	-3.76017	0.76017	3.66595	109.128	5.746	4208	475	4016	1238	1775.5	2057	2002.26	2316	NA	cobT
2-Propyl-Aniline	0	DB02970	-4.78284	0.70009	4.28543	135.21	5.74597	3724	783	3604	1239	1899.58	2274	2190.38	2630	NA	E
Alclometasone	0	DB00240	-9.33484	0.61317	6.43903	408.922	5.74588	33	1279	533	1240	408.68	140	282.295	106	Alclometasone is synthetic glucocorticoid steroid for topical use in dermatology as anti-inflammatory, antipruritic, antiallergic, antiproliferative and vasoconstrictive agent.	NR3C1
(3-Carboxy-2-(R)-Hydroxy-Propyl)-Trimethyl-Ammonium	0	DB02648	-4.05976	0.24717	3.27609	162.209	5.74584	4105	3812	4281	1241	3019.57	3933	4061.35	4490	Constituent of striated muscle and liver. It is used therapeutically to stimulate gastric and pancreatic secretions and in the treatment of hyperlipoproteinemias. [PubChem]	CRAT,CROT
2-Phosphoglycolic-Acid	6	DB02726	-3.5339	0.51945	3.15635	156.03	5.74558	4277	1939	4340	1242	2585.72	3393	3301.68	4062	NA	PKLR,TPI,yniC,ENO3,nagB,pfkA,TPI1,PKM2,tpiA,mgsA,ENO2,tpiA,aroG
(2,6-DIMETHYL-PHENOXY)-ACETIC-ACID	0	DB07634	-5.21346	0.17009	3.84245	180.203	5.74533	3430	4165	3913	1243	2887.17	3790	3823.6	4436	NA	gag-pol
2-[METHYL-(5-GERANYL-4-METHYL-PENT-3-ENYL)-AMINO]-ETHYL-DIPHOSPHATE	0	DB08180	-5.87043	0.15137	5.49098	453.453	5.74485	2881	4250	2252	1244	2420.08	3131	3021.11	3770	NA	FNTA,PGGT1B
METHYL-N-[(2',4'-DIFLUORO-4-HYDROXY-5-IODOBIPHENYL-3-YL)CARBONYL]-BETA-ALANINATE	0	DB07962	-6.78866	0.51852	6.11149	461.202	5.74482	1777	1955	1061	1245	1463.62	1520	1544.72	1621	NA	NA
(2R,3R,4S)-3-(4-HYDROXYPHENYL)-4-METHYL-2-[4-(2-PYRROLIDIN-1-YLETHOXY)PHENYL]CHROMAN-6-OL	1	DB07567	-7.49672	0.19441	6.02073	445.559	5.74447	838	4070	1255	1246	1519.67	1617	1623.66	1745	NA	ESR1
Camazepam	0	DB01489	-7.43093	0.37099	5.88966	371.824	5.74404	913	3016	1521	1247	1511.73	1606	1611.92	1724	"Camazepam is a benzodiazepine which is a dimethyl carbamate ester of tamzepam, a metabolite of diazepam. Similarly to other drugs in its class, it has antxiolytic, anticonvulsant, hypnotic, and skeletal muscle relaxant properties. However, unlike other benzodiapeines camazepam is predominantly anxiolytic and is relatively weak as an anticonvulsant, hypnotic and skeletal muscle relaxant.	NA
Tetrahydrooxazine	9	DB03862	-4.08506	0.8804	3.62653	149.146	5.74377	4091	127	4053	1248	1273.23	1200	1281.75	1216	NA	cel5A,bglA
Brinzolamide	2	DB01194	-6.01493	0.66447	5.9594	383.517	5.74296	2729	981	1390	1249	1468.29	1529	1549.63	1632	Brinzolamide is a highly specific, non-competitive, reversible carbonic anhydrase inhibitor. Carbonic anhydrase (CA) is an enzyme found in many tissues of the body including the eye. It catalyzes the reversible reaction involving the hydration of carbon dioxide and the dehydration of carbonic acid. In humans, carbonic anhydrase exists as a number of isoenzymes, the most active being carbonic anhy…	CA2,CA1,CA4,CA5A
(3R)-3-cyclopentyl-6-methyl-7-[(4-methylpiperazin-1-yl)sulfonyl]-3,4-dihydro-2H-1,2-benzothiazine-1,1-dioxide	0	DB08305	-7.55253	0.34195	6.14921	427.592	5.74295	790	3240	987	1250	1333.06	1285	1361.96	1325	NA	GRIA2
Gatifloxacin	0	DB01044	-7.12709	0.2591	6.35222	375.4	5.7428	1262	3752	652	1251	1401.87	1407	1456.1	1474	Gatifloxacin is an antibiotic agent and a member of the fourth-generation fluoroquinolone family. It works by inhibiting the bacterial enzymes DNA gyrase and topoisomerase IV. It was first introduced by Bristol-Myers Squibb in 1999 under the brand name Tequin庐 for the treatment of respiratory tract infections. Gatifloxacin is available as tablets and in various aqueous solutions for intravenous t…	gyrA,gyrB,parC,parE
1-(5-BROMO-PYRIDIN-2-YL)-3-[2-(6-FLUORO-2-HYDROXY-3-PROPIONYL-PHENYL)-CYCLOPROPYL]-UREA	0	DB07451	-7.52677	0.27933	5.9656	422.254	5.74274	809	3624	1376	1252	1499.13	1581	1591.91	1695	NA	gag-pol
4-(4-CHLORO-PHENYL)-1-{3-[2-(4-FLUORO-PHENYL)-[1,3]DITHIOLAN-2-YL]-PROPYL}-PIPERIDIN-4-OL	1	DB08622	-7.72467	0.1657	6.56799	452.06	5.74222	637	4186	376	1253	1058.69	865	1000.86	854	NA	gag-pol
N-(3-METHYLBUT-2-EN-1-YL)-9H-PURIN-6-AMINE	2	DB08768	-5.20544	0.88764	5.45231	203.249	5.74189	3437	115	2314	1254	1034.87	824	970.689	815	NA	CDK2
N-Cyclohexyl-N'-(4-Iodophenyl)Urea	0	DB02029	-6.07597	0.45019	5.23532	344.196	5.74128	2666	2465	2644	1255	2160.95	2716	2590.08	3202	NA	EPHX2
Loperamide	2	DB00836	-7.7655	0.19296	6.38268	477.048	5.74116	595	4082	614	1256	1169.87	1037	1142.49	1005	One of the long-acting synthetic antidiarrheals; it is not significantly absorbed from the gut, and has no effect on the adrenergic system or central nervous system, but may antagonize histamine and interfere with acetylcholine release locally.	OPRM1,OPRD1,OPRK1,CACNA1A,POMC,CALM1
3-[(4-AMINO-1-TERT-BUTYL-1H-PYRAZOLO[3,4-D]PYRIMIDIN-3-YL)METHYL]PHENOL	1	DB08461	-7.07481	0.91048	6.6515	297.362	5.74024	1334	77	284	1257	437.598	163	307.838	119	NA	AR
2-[(2-methoxyethyl)amino]-4-(4-oxo-1,2,3,4-tetrahydro-9H-carbazol-9-yl)benzamide	0	DB08557	-7.45941	0.3965	6.48783	377.444	5.74008	876	2851	470	1258	1102.35	938	1054.87	908	NA	HSP90AA1
Flurazepam	0	DB00690	-7.16287	0.76768	6.75502	387.886	5.73965	1222	446	200	1259	608.647	303	477.689	261	A benzodiazepine derivative used mainly as a hypnotic.	GABRG1,GABRG2,GABRG3,GABRD,GABRE,GABRP,GABRR1,GABRR2,GABRR3,GABRQ,GABRA1,GABRA2,GABRA3,GABRA4,GABRA5,GABRA6,GABRB1,GABRB2,GABRB3
3-FLUORO-N-[1-(4-FLUOROPHENYL)-3-(2-THIENYL)-1H-PYRAZOL-5-YL]BENZENESULFONAMIDE	1	DB08560	-7.51032	0.4956	6.70404	417.462	5.73954	826	2128	242	1260	855.627	577	752.066	546	NA	PPARG
Neamine	0	DB04808	-7.85517	0.353	4.61924	322.362	5.73906	518	3167	3288	1261	1614.94	1790	1753.76	1927	NA	NA
5-CHLORO-N-((1R,2S)-2-(4-(2-OXOPYRIDIN-1(2H)-YL)BENZAMIDO)-CYCLOPENTYL)THIOPHENE-2-CARBOXAMIDE	1	DB08174	-7.75147	0.1525	6.10007	441.94	5.73853	606	4246	1095	1262	1373.19	1356	1412.39	1411	NA	F10
(1S,6BR,9AS,11R,11BR)-9A,11B-DIMETHYL-1-[(METHYLOXY)METHYL]-3,6,9-TRIOXO-1,6,6B,7,8,9,9A,10,11,11B-DECAHYDRO-3H-FURO[4,3,2-DE]INDENO[4,5-H][2]BENZOPYRAN-11-YL-ACETATE	6	DB08059	-7.56746	0.72157	6.52552	428.437	5.73687	774	668	420	1263	723.673	425	601.066	386	Wortmannin is a steroid metabolite of _Penicillium funiculosum_ and _Talaromyces wortmannii_ fungi. This drug acts as a nonspecific, covalent inhibitor of phosphoinositide 3-kinase enzymes (PI3Ks).	PIK3CG,PLK1,PIK3R1,PIK3CA
Glisoxepide	0	DB01289	-7.68425	0.43285	6.00053	449.533	5.73681	671	2589	1300	1264	1299.83	1242	1312	1267	Glisoxepide is one of the sulphonamide-derived oral antidiabetic drugs. It inhibits the uptake of bile acids into isolated rat hepatocytes. However it inhibits taurocholate uptake only in the absence of sodium ions. Glisoxepide uptake could be further inhibited by blockers of the hepatocellular monocarboxylate transporter, by the loop diuretic bumetanide, by 4,4'-diisothiocyano-2,2'-stilbenedisul…	ABCC8,KCNJ8
6-Fluoro-2-(2'-Fluoro-1,1'-Biphenyl-4-Yl)-3-Methylquinoline-4-Carboxylic-Acid	3	DB03523	-7.98018	0.39912	6.18293	375.374	5.73655	437	2837	925	1265	1097.47	934	1046.71	900	NA	DHODH
Amprenavir	2	DB00701	-6.99192	0.27279	6.36885	505.637	5.73639	1473	3670	631	1266	1441.56	1474	1505.33	1552	Amprenavir is a protease inhibitor used to treat HIV infection.	HIV-1-protease
N-({6-[(4-CYANOBENZYL)OXY]NAPHTHALEN-2-YL}SULFONYL)-D-GLUTAMIC-ACID	2	DB08108	-7.28831	0.23061	5.76672	468.487	5.73514	1058	3898	1757	1267	1740.68	1999	1935.08	2224	NA	murD
Pentosan-Polysulfate	0	DB00686	-7.49366	0.38809	4.81888	602.501	5.7351	841	2902	3118	1268	1762.47	2043	1966.93	2270	A sulfated pentosyl polysaccharide with heparin-like properties. [PubChem]	FGF2,FGF1,FGF4
7-AMINO-4-METHYL-CHROMEN-2-ONE	0	DB08168	-5.99935	0.53525	4.40657	175.187	5.735	2750	1837	3482	1269	2173.62	2740	2600.7	3217	NA	ppiA,PPIF,HDAC8
(5-(aminomethyl)-2H-spiro[benzofuran-3,4'-piperidine]-1'-yl)(5-(phenylethynyl)furan-2-yl)methanone	4	DB06962	-7.4687	0.4078	6.19991	412.489	5.73497	864	2769	883	1270	1279.82	1209	1283.12	1218	NA	TPSB2
1-(1'-{[3-(methylsulfanyl)-2-benzothiophen-1-yl]carbonyl}spiro[1-benzofuran-3,4'-piperidin]-5-yl)methanamine	0	DB06848	-8.51217	0.56977	6.72289	424.591	5.73493	193	1599	224	1271	544.44	241	410.41	201	NA	TPSAB1
N-[1-(AMINOMETHYL)CYCLOPROPYL]-3-(MORPHOLIN-4-YLSULFONYL)-N~2~-[(1S)-2,2,2-TRIFLUORO-1-(4-FLUOROPHENYL)ETHYL]-L-ALANINAMIDE	7	DB07520	-6.80181	0.65699	6.57599	482.5	5.73352	1760	1020	366	1272	956.137	697	869.357	687	NA	CTSS
2,6-DIMETHYL-1-(3-[3-METHYL-5-ISOXAZOLYL]-PROPANYL)-4-[2-METHYL-4-ISOXAZOLYL]-PHENOL	0	DB08715	-6.51191	0.34286	6.00384	326.396	5.73352	2148	3236	1293	1273	1839.15	2177	2079.12	2432	NA	Not-Available
Meropenem	2	DB00760	-6.61244	0.08559	5.31032	383.47	5.73313	2018	4433	2523	1274	2315.67	2953	2826.04	3535	"Meropenem is a broad-spectrum carbapenem antibiotic. It is active against Gram-positive and Gram-negative bacteria. Meropenem exerts its action by penetrating bacterial cells readily and interfering with the synthesis of vital cell wall components, which leads to cell death.	dacB
Creatine	3	DB00148	-3.61237	0.49927	3.13278	131.135	5.73306	4258	2100	4348	1275	2653.42	3490	3387.7	4146	An amino acid that occurs in vertebrate tissues and in urine. In muscle tissue, creatine generally occurs as phosphocreatine. Creatine is excreted as creatinine in the urine.	CKM,CKMT1A,CKB,CKMT2,SLC6A8,GAMT
AL5424	3	DB01964	-6.99463	0.62785	5.85117	390.464	5.73237	1466	1189	1586	1276	1370.46	1348	1403.48	1398	NA	CA2
N-[5-(ETHYLSULFONYL)-2-METHOXYPHENYL]-5-[3-(2-PYRIDINYL)PHENYL]-1,3-OXAZOL-2-AMINE	0	DB07334	-7.56985	0.78145	6.83071	435.505	5.73171	769	397	151	1277	492.574	203	358.562	158	NA	KDR
2-[3-(2-Hydroxy-1,1-Dihydroxymethyl-Ethylamino)-Propylamino]-2-Hydroxymethyl-Propane-1,3-Diol	2	DB02676	-4.74032	0.54419	4.3557	282.337	5.73092	3752	1785	3540	1278	2346.17	3011	2872.77	3585	NA	PDE4D
N-BENZYLOXYCARBONYL-ALA-PRO-3-AMINO-4-PHENYL-BUTAN-2-OL	0	DB06886	-7.65715	0.31607	6.17419	467.566	5.73051	695	3401	942	1279	1299.06	1240	1305.81	1257	NA	apr
3,4-Dihydro-2h-Pyrrolium-5-Carboxylate	0	DB02838	-3.64587	0.67417	3.24379	113.116	5.72984	4250	929	4306	1280	2159.84	2714	2571.34	3177	NA	DAO
Mequitazine	0	DB01071	-9.14816	0.29639	6.00451	322.477	5.72968	49	3526	1291	1281	731.12	434	606.459	391	Mequitazine is a histamine H1 antagonist (antihistamine). It competes with histamine for the normal H1-receptor sites on effector cells of the gastrointestinal tract, blood vessels and respiratory tract. It provides effective, temporary relief of sneezing, watery and itchy eyes, and runny nose due to hay fever and other upper respiratory allergies.	HRH1
Mechlorethamine	0	DB00888	-3.03557	0.68282	3.96064	156.056	5.72965	4386	883	3843	1282	2090	2595	2459.8	3017	"A vesicant and necrotizing irritant destructive to mucous membranes, mechlorethamine is an alkylating drug. It was formerly used as a war gas. The hydrochloride is used as an antineoplastic in Hodgkin's disease and lymphomas. It causes severe gastrointestinal and bone marrow damage. [PubChem]	Not-Available
Levorphanol	2	DB00854	-8.5091	0.38158	4.90364	257.377	5.72947	198	2944	3049	1283	1228.84	1120	1211.3	1113	A narcotic analgesic that may be habit-forming. It is nearly as effective orally as by injection.	OPRM1,OPRD1,OPRK1
4-Flourobenzenesulfonamide	0	DB01784	-5.10941	0.79404	4.03919	175.184	5.72932	3507	351	3782	1284	1563.62	1696	1669.76	1807	NA	CA2
N-[2-methyl-5-(methylcarbamoyl)phenyl]-2-{[(1R)-1-methylpropyl]amino}-1,3-thiazole-5-carboxamide	0	DB06991	-6.82582	0.68635	6.08671	346.456	5.72868	1717	867	1124	1285	1210.92	1096	1187.19	1074	NA	MAPK14
4-{5-[(Z)-(2-IMINO-4-OXO-1,3-THIAZOLIDIN-5-YLIDENE)METHYL]-2-FURYL}-N-METHYLBENZENESULFONAMIDE	0	DB07533	-7.28776	0.43457	5.80533	363.42	5.7281	1060	2576	1681	1286	1558.71	1686	1661.91	1795	NA	CCNA2,CDK2
3[N-Morpholino]Propane-Sulfonic-Acid	4	DB03434	-4.31002	0.27303	4.22852	209.267	5.72787	3993	3667	3649	1287	2879.66	3780	3766.41	4425	NA	yicI,GNLY,purT
Tolnaftate	0	DB00525	-7.26017	0.37097	5.7546	307.418	5.72772	1103	3017	1781	1288	1662.2	1877	1809.69	2026	Tolnaftate is a synthetic over-the-counter anti-fungal agent. It may come as a cream, powder, spray, or liquid aerosol, and is used to treat jock itch, athlete's foot and ringworm. It is sold under several brand names, most notably Tinactin and Odor Eaters.	ERG1
Naltrexone	4	DB00704	-9.09845	0.44452	5.83634	341.407	5.72711	56	2503	1614	1289	734.854	442	609.328	392	Derivative of noroxymorphone that is the N-cyclopropylmethyl congener of naloxone. It is a narcotic antagonist that is effective orally, longer lasting and more potent than naloxone, and has been proposed for the treatment of heroin addiction. The FDA has approved naltrexone for the treatment of alcohol dependence.	OPRD1,OPRM1,OPRK1,OPRS1
3-({4-[(5-chloro-1,3-benzodioxol-4-yl)amino]pyrimidin-2-yl}amino)benzenesulfonamide	2	DB07252	-7.48879	0.69887	7.04062	419.85	5.72706	846	790	56	1290	468.753	184	334.499	143	NA	EPHB4
2-(Trimethylammonium)Ethyl-Thiol	0	DB01803	-2.62154	0.60324	3.59842	120.241	5.7266	4440	1349	4076	1291	2369.4	3058	2900.97	3615	NA	srtB
Dexmedetomidine	6	DB00633	-5.50966	0.71604	5.20672	200.285	5.72657	3215	702	2681	1292	1672.13	1889	1822.24	2050	An agonist of receptors, adrenergic alpha-2 that is used in veterinary medicine for its analgesic and sedative properties. It is the racemate of dexmedetomidine.	ADRA2A
Cefepime	1	DB01413	-6.91662	0.32546	6.24486	480.572	5.72625	1585	3349	810	1293	1535.53	1646	1626.08	1750	Cefepime is a fourth-generation cephalosporin antibiotic developed in 1994. Cefepime is active against Gram-positive and Gram-negative bacteria, with greater activity against both than third-generation antibiotics. Cefepime is usually reserved to treat severe nosocomial pneumonia, infections caused by multi-resistant microorganisms (e.g. Pseudomonas aeruginosa) and empirical treatment of febrile …	mrdA,ftsI,pbpB,pbpA
Pemoline	4	DB01230	-5.29089	0.83666	4.41197	176.175	5.72615	3374	227	3477	1294	1362.47	1329	1386.09	1369	In 2005, the Food and Drug Administration (FDA) withdrew approval for pemoline. In March 2005, Abbott Laboratories (Cylert marketer) had discontinued the production of Cylert arguing economic reasons.	NA
N-{(1S,2R)-1-BENZYL-3-[(CYCLOPROPYLMETHYL)(2-FURYLSULFONYL)AMINO]-2-HYDROXYPROPYL}-N'-METHYLSUCCINAMIDE	2	DB08223	-6.43688	0.20787	6.2828	477.583	5.72595	2235	4002	758	1295	1721.37	1975	1892.67	2149	NA	pol
Dimethylthiambutene	3	DB01444	-4.96828	0.2288	5.35704	263.431	5.72593	3602	3912	2446	1296	2585.24	3391	3254.37	4022	Dimethylthiambutene (N,N-Dimethyl-1-methyl-3,3-di-2-thienylallylamine, Dimethibutin, Ohton) is an opioid analgesic drug. It is now under international control under Schedule I of the UN Single Convention On Narcotic Drugs 1961, presumably due to high abuse potential, although little more information is available.	OPRM1,OPRD1
4-Methylaminorex	0	DB01447	-5.68209	0.81736	4.43166	176.219	5.72587	3060	267	3462	1297	1383.96	1374	1414.23	1414	NA	NA
Ertapenem	1	DB00303	-8.0772	0.18389	5.59582	475.523	5.7257	384	4111	2080	1298	1436.83	1462	1486.33	1517	Ertapenem is a carbapenem antibiotic drug that is marketed under the trade name Invanz by Merck & Co. pharmaceutical company. It is structurally similar to [meropenem] and possess a 1-beta-methyl group.	mrdA,mrdA,ftsI,ftsI,dacB,mrcA,mrcB,dacC
Fexofenadine	3	DB00950	-7.80634	0.14612	6.19369	501.667	5.72502	554	4266	900	1299	1289.28	1221	1286.05	1223	Fexofenadine hydrochloride (Allegra) is an antihistamine drug used in the treatment of hayfever and similar allergy symptoms. It was developed as a successor of and alternative to terfenadine. Fexofenadine, like other second and third-generation antihistamines, does not readily pass through the blood-brain barrier, and so causes less drowsiness than first-generation histamine-receptor antagonists.	HRH1
[5-HYDROXY-2-(4-HYDROXYPHENYL)-1-BENZOFURAN-7-YL]ACETONITRILE	3	DB06927	-6.72937	0.5983	5.74767	265.268	5.72482	1863	1391	1800	1300	1569.24	1703	1670.85	1808	NA	ESR2,NCOA1,ESR1
1-(2,6-Dichlorophenyl)-5-(2,4-Difluorophenyl)-7-Piperidin-4-Yl-3,4-Dihydroquinolin-2(1h)-One	0	DB01948	-8.65937	0.23372	6.84207	487.377	5.72453	150	3882	147	1301	577.677	274	440.712	227	NA	MAPK14
(4R)-7,8-dichloro-1',9-dimethyl-1-oxo-1,2,4,9-tetrahydrospiro[beta-carboline-3,4'-piperidine]-4-carbonitrile	0	DB07242	-8.53881	0.76758	6.80545	377.275	5.72422	186	447	168	1302	367.227	113	240.83	81	NA	DAPK3,PIM1
Paramethasone	1	DB01384	-9.46969	0.65121	6.29605	392.467	5.72406	23	1056	740	1303	391.194	127	261.944	91	A glucocorticoid with the general properties of corticosteroids. It has been used by mouth in the treatment of all conditions in which corticosteroid therapy is indicated except adrenal-deficiency states for which its lack of sodium-retaining properties makes it less suitable than hydrocortisone with supplementary fludrocortisone. (From Martindale, The Extra Pharmacopoeia, 30th ed, p737)	NR3C1
5-[(5-fluoro-3-methyl-1H-indazol-4-yl)oxy]benzene-1,3-dicarbonitrile	5	DB07935	-6.32931	0.76311	6.68287	292.273	5.72405	2375	465	264	1304	785.235	503	663.092	449	NA	pol
Quinestrol	0	DB04575	-8.55503	0.55751	6.59222	364.529	5.72375	179	1687	346	1305	607.664	301	470.993	256	The 3-cyclopentyl ether of ethinyl estradiol.	ESR1
N-Carbamoyl-L-Aspartate	1	DB04252	-4.57312	0.25701	3.47188	176.128	5.72365	3853	3758	4171	1306	2980.13	3882	3923.42	4467	NA	pyrC
Phosphonoacetaldehyde	4	DB03174	-2.764	0.5961	3.24574	124.032	5.7233	4424	1406	4304	1307	2432.13	3151	2991.51	3733	NA	phnX
5-iodotubercidin	1	DB04604	-6.98208	0.91554	5.7481	392.153	5.72226	1487	69	1797	1308	700.776	396	569.162	345	NA	CSNK1G2,GSG2,MAPK3
Streptomycin	0	DB01082	-8.06436	0.11126	4.49448	581.58	5.72172	391	4379	3404	1309	1661.96	1875	1799.62	2008	Streptomycin is an aminoglycoside antibiotic produced by the soil actinomycete Streptomyces griseus. It acts by binding to the 30S ribosomal subunit of susceptible organisms and disrupting the initiation and elongation steps in protein synthesis. It is bactericidal due to effects that are not fully understood.	rpsL,Not-Available
Zonisamide	0	DB00909	-5.6239	0.77204	4.82308	212.23	5.72156	3111	427	3115	1310	1525.86	1627	1605.44	1715	Zonisamide is a sulfonamide anticonvulsant approved for use as an adjunctive therapy in adults with partial-onset seizures. Zonisamide may be a carbonic anhydrase inhibitor although this is not one of the primary mechanisms of action. Zonisamide may act by blocking repetitive firing of voltage-gated sodium channels leading to a reduction of T-type calcium channel currents, or by binding allosteri…	SCN3B,SCN4B,CACNA1G,CACNA1H,CACNA1I,CA1,CA2,CA3,CA4,CA5A,SCN1A,CA5B,CA6,CA7,CA8,CA9,CA10,CA11,CA12,CA13,CA14,SCN2A,MAOB,MAOA,SCN3A,SCN4A,SCN5A,SCN9A,SCN11A,SCN1B,SCN2B
Hymenialdisine	0	DB02950	-6.86006	0.59195	5.95913	324.138	5.72148	1668	1435	1391	1311	1445.42	1484	1493.22	1525	NA	CDK5,CDK1,CDK2,CDK2deltaT
Chenodeoxycholic-acid	2	DB06777	-9.34055	0.76429	6.87714	392.58	5.72103	31	460	129	1312	221.646	45	122.528	26	Chenodeoxycholic acid (or Chenodiol) is an epimer of ursodeoxycholic acid (DB01586). Chenodeoxycholic acid is a bile acid naturally found in the body. It works by dissolving the cholesterol that makes gallstones and inhibiting production of cholesterol in the liver and absorption in the intestines, which helps to decrease the formation of gallstones. It can also reduce the amount of other bile ac…	NR1H4
2,3-DIPHENYL-N-(2-PIPERAZIN-1-YLETHYL)FURO[2,3-B]PYRIDIN-4-AMINE	6	DB07146	-7.00968	0.45349	6.37099	398.51	5.721	1442	2437	627	1313	1304.18	1248	1301.26	1249	NA	LCK
Beta-Hydroxyaspartic-Acid	3	DB03640	-3.86989	0.45541	2.90575	149.102	5.72072	4174	2422	4436	1314	2770.63	3657	3552.82	4294	NA	bla
Flavoxate	0	DB01148	-7.66979	0.80277	6.62139	391.467	5.72055	684	322	318	1315	550.892	249	412.205	203	A drug that has been used in various urinary syndromes and as an antispasmodic. Its therapeutic usefulness and its mechanism of action are not clear. It may have local anesthetic activity and direct relaxing effects on smooth muscle as well as some activity as a muscarinic antagonist. [PubChem]	CHRM2,CHRM1
5-bromo-3-(pyrrolidin-1-ylsulfonyl)-1H-indole-2-carboxamide	0	DB08211	-6.38044	0.7537	6.17968	372.244	5.72054	2314	507	932	1316	1095.24	929	1030.22	884	NA	gag-pol
4-{[(14beta,17alpha)-3-hydroxyestra-1,3,5(10)-trien-17-yl]oxy}-4-oxobutanoic-acid	4	DB07891	-7.98047	0.47738	6.26636	372.461	5.71965	436	2270	782	1317	1004.79	777	918.135	757	NA	MT0785
1-(3-METHYLPHENYL)-1H-BENZIMIDAZOL-5-AMINE	0	DB07972	-6.76868	0.89883	5.65028	223.279	5.71954	1805	97	1987	1318	822.888	539	703.313	492	NA	cyp130
4-[(4-O-SULFAMOYLBENZYL)(4-CYANOPHENYL)AMINO]-4H-[1,2,4]-TRIAZOLE	0	DB04601	-6.52308	0.23703	5.94547	370.394	5.71943	2134	3867	1417	1319	1981.74	2423	2269.76	2751	NA	CA2
N-[(1R)-3-(4-HYDROXYPHENYL)-1-METHYLPROPYL]-2-(2-PHENYL-1H-INDOL-3-YL)ACETAMIDE	3	DB07991	-7.94289	0.32593	6.197	398.506	5.71936	460	3343	890	1320	1159.35	1019	1110.27	967	NA	ESR1
Mesalazine	1	DB00244	-5.14916	0.47009	3.30679	153.137	5.71935	3476	2317	4262	1321	2594.96	3403	3249.92	4015	An anti-inflammatory agent, structurally related to the salicylates and non-steroidal anti-inflammatory drugs like acetylsalicylic acid, which is active in inflammatory bowel disease [A174022]. It is considered to be the active moiety of sulphasalazine. (From Martindale, The Extra Pharmacopoeia, 30th ed) Although demonstrably effective in treating and maintaining remission for ulcerative colitis,…	PTGS2,PTGS1,ALOX5,PPARG,CHUK,IKBKB,MPO,nat
N-({(3R,4R)-4-[(benzyloxy)methyl]pyrrolidin-3-yl}methyl)-N-(2-methylpropyl)benzenesulfonamide	1	DB07505	-6.65349	0.27103	6.3388	416.587	5.71926	1966	3683	665	1322	1588.4	1746	1688.63	1830	NA	gag-pol
Pregabalin	3	DB00230	-4.43133	0.48357	4.26409	159.229	5.71922	3936	2217	3625	1323	2543.44	3320	3162.59	3924	Pregabalin is an anticonvulsant drug used for neuropathic pain, epilepsy and generalized anxiety disorder.[A31161] Although as per the FDA Label the mechanism of action has not been definitively defined, there is evidence that pregabalin achieves antihyperalgesic activity by binding to the 伪2未 subunit of the voltage-dependent calcium channels [A31162]. Pregabalin is marketed by Pfizer under the t…	CACNA1A
N'-(5-CHLOROBENZOFURAN-2-CARBONYL)-2-(TRIFLUOROMETHYL)BENZENESULFONOHYDRAZIDE	1	DB07544	-7.80163	0.39493	6.00764	418.78	5.71774	560	2857	1285	1324	1284.47	1211	1271.55	1203	NA	BCAT1
Nalidixic-Acid	0	DB00779	-6.14433	0.42684	4.70184	232.239	5.71735	2589	2638	3212	1325	2321.93	2966	2799.37	3498	Nalidixic acid is a synthetic 1,8-naphthyridine antimicrobial agent with a limited bacteriocidal spectrum. It is an inhibitor of the A subunit of bacterial DNA gyrase.	Not-Available
(9aS)-4-bromo-9a-butyl-7-hydroxy-1,2,9,9a-tetrahydro-3H-fluoren-3-one	8	DB07757	-6.44152	0.57076	6.07175	335.241	5.71717	2229	1592	1162	1326	1529.15	1635	1603.56	1707	NA	ESR2
Sertaconazole	3	DB01153	-6.88786	0.47414	6.93457	437.779	5.71691	1627	2291	106	1327	850.937	571	733.792	526	Sertaconazole nitrate is an antifungal medication of the imidazole class. It is available in topical formulations for the treatment of skin infections such as athlete's foot.	ERG11
Tanaproget	0	DB04787	-7.32209	0.68359	6.07902	297.383	5.71628	1021	882	1145	1328	1081.74	911	1010.26	865	Tanaproget (NSP-989) is an investigational non-steroidal progestin. It is a high affinity, high efficacy agonist of the progesterone receptor (PR) with a much more selective binding profile relative to most conventional progestins. Because of this tanaproget may prove to produce fewer side effects in comparison. It is currently in the process of being developed for clinical use as a contraceptive…	PGR
Topiramate	2	DB00273	-6.51293	0.83861	5.69953	339.366	5.7161	2147	225	1888	1329	1049.27	849	969.778	812	"Topiramate is a sulfamate-substituted monosaccharide with some activity against carbonic anhydrase.[A175225] It was conceived as part of the efforts to generate analogs of fructose-1,6-diphosphate to block gluconeogenesis in which topiramate was a synthetic intermediate. Analyzing its similarity to acetazolamide, researchers decided to study its capability as an anticonvulsant agent where was sh…	GABRA1,SCN1A,GRIK1,CA2,CA4
3-(4-Amino-2-Tert-Butyl-5-Methyl-Phenylsulfanyl)-6-Cyclopentyl-4-Hydroxy-6-[2-(4-Hydroxy-Phenyl)-Ethyl]-5,6-Dihydro-Pyran-2-One	1	DB04298	-8.5075	0.52115	7.04458	495.685	5.71556	199	1926	55	1330	409.196	141	276.243	103	NA	Not-Available
Dipyridamole	6	DB00975	-6.01134	0.07795	5.40583	504.636	5.71523	2735	4450	2382	1331	2492.35	3241	3071.99	3832	A phosphodiesterase inhibitor that blocks uptake and metabolism of adenosine by erythrocytes and vascular endothelial cells. Dipyridamole also potentiates the antiaggregating action of prostacyclin. (From AMA Drug Evaluations Annual, 1994, p752)	PDE10A,ADA,PDE5A,PDE4A
N-METHYL(5-(PYRIDIN-3-YL)FURAN-2-YL)METHANAMINE	0	DB07617	-5.46134	0.78324	4.83496	188.23	5.7152	3255	388	3103	1332	1511.53	1605	1576.6	1672	NA	CYP2A6
(3S)-1-CYCLOHEXYL-N-(3,5-DICHLOROPHENYL)-5-OXOPYRROLIDINE-3-CARBOXAMIDE	0	DB07188	-7.17798	0.34706	5.85022	355.265	5.71509	1204	3206	1591	1333	1691.5	1922	1831.27	2063	NA	inhA
Rimonabant	0	DB06155	-6.99325	0.05141	6.42167	463.796	5.71491	1471	4482	561	1334	1490.39	1572	1546.5	1625	Rimonabant is an anorectic anti-obesity drug produced and marketed by Sanofi-Aventis. It is an inverse agonist for the cannabinoid receptor CB1. Its main avenue of effect is reduction in appetite. Rimonabant is the first selective CB1 receptor blocker to be approved for use anywhere in the world. Rimonabant is approved in 38 countries including the E.U., Mexico, and Brazil. It was rejected for ap…	CNR1
Theophylline	0	DB00277	-5.28154	0.87563	4.38431	180.167	5.71357	3379	138	3508	1335	1215.63	1098	1178.26	1061	A methylxanthine derivative from tea with diuretic, smooth muscle relaxant, bronchial dilation, cardiac and central nervous system stimulant activities. Mechanistically, theophylline acts as a phosphodiesterase inhibitor, adenosine receptor blocker, and histone deacetylase activator. Theophylline is marketed under several brand names such as Uniphyl and Theochron, and it is indicated mainly for a…	ADORA1,ADORA2A,ADORA2B,PDE4B,PDE5A,PDE4A,PDE3A
4-(4-CHLOROPHENYL)-4-[4-(1H-PYRAZOL-4-YL)PHENYL]PIPERIDINE	2	DB07859	-7.58263	0.187	6.10776	337.854	5.7135	762	4103	1070	1336	1453.99	1503	1495.59	1530	NA	PRKACA,PKIA,AKT2,GSK3B
N-cyclopropyl-4-methyl-3-{2-[(2-morpholin-4-ylethyl)amino]quinazolin-6-yl}benzamide	0	DB08351	-8.34714	0.2798	5.99497	431.54	5.71319	252	3619	1315	1337	1125.28	973	1062.44	917	NA	MAPK14
[1-HYDROXY-2-(1,1':3',1''-TERPHENYL-3-YLOXY)ETHANE-1,1-DIYL]BIS(PHOSPHONIC-ACID)	1	DB07426	-8.75427	0.57475	5.66523	450.32	5.71315	116	1561	1959	1338	830.019	550	707.889	498	NA	uppS
Ajmaline	4	DB01426	-7.75149	0.78027	6.42182	326.44	5.713	605	404	560	1339	654.299	354	515.357	291	An alkaloid found in the root of Rauwolfia serpentina, among other plant sources. It is a class Ia antiarrhythmic agent that apparently acts by changing the shape and threshold of cardiac action potentials. Ajmaline produces potent sodium channel blocking effects and a very short half-life which makes it a very useful drug for acute intravenous treatments. The drug has been very popular in some c…	SCN5A
[(4-{4-[4-(Difluoro-Phosphono-Methyl)-Phenyl]-Butyl}-Phenyl)-Difluoro-Methyl]-Phosphonic-Acid	8	DB04204	-6.76163	0.05017	4.95666	470.292	5.71219	1816	4484	2977	1340	2387.35	3083	2894.14	3606	NA	PTPN1
Oxaloacetate-Ion	7	DB02637	-3.4315	0.451	3.04145	131.063	5.71169	4301	2453	4385	1341	2806.51	3696	3589.87	4321	NA	CS,mdh,SPR,Not-Available,DR_1240
2-AMINO-4-HYDROXYPYRIMIDINE-5-CARBOXYLIC-ACID-ETHYL-ESTER	0	DB06906	-5.25782	0.7377	4.11713	183.167	5.71168	3401	592	3727	1342	1781.39	2068	1957.77	2258	NA	folB
N-({(2S)-1-[(3R)-3-amino-4-(3-chlorophenyl)butanoyl]pyrrolidin-2-yl}methyl)-3-(methylsulfonyl)benzamide	0	DB08429	-8.22107	0.52166	6.97344	478.014	5.71111	302	1922	79	1343	498.157	206	357.928	157	NA	DPP4
PHENYLALANINDIOL	7	DB07910	-4.61367	0.66086	3.8974	167.208	5.71108	3825	1003	3881	1344	2115.04	2636	2460.13	3019	NA	gag-pol,gag-pol,gag-pol
4-Bromo-2,5-dimethoxyphenethylamine	4	DB01537	-4.68254	0.37111	4.49542	260.131	5.71072	3783	3015	3403	1345	2687.99	3535	3385.8	4143	NA	NA
Cefuroxime	1	DB01112	-6.55855	0.33079	5.34156	424.391	5.71066	2087	3317	2476	1346	2191.62	2770	2578.34	3184	Broad-spectrum cephalosporin antibiotic resistant to beta-lactamase. It has been proposed for infections with gram-negative and gram-positive organisms, gonorrhea, and haemophilus.	pbpA
1-Hydroxy-2-Amino-3-Cyclohexylpropane	7	DB04387	-4.0398	0.54565	4.09016	157.257	5.71037	4116	1773	3745	1347	2463.21	3197	3012.16	3758	NA	REN,SAP2
Nicotinamide-Mononucleotide	3	DB03227	-6.60388	0.3966	4.79774	335.229	5.70986	2022	2850	3140	1348	2222.34	2812	2625.34	3252	3-Carbamoyl-1-beta-D-ribofuranosyl pyridinium hydroxide-5&#39;phosphate, inner salt. A nucleotide in which the nitrogenous base, nicotinamide, is in beta-N-glycosidic linkage with the C-1 position of D-ribose. Synonyms: Nicotinamide Ribonucleotide; NMN. [PubChem]	NMNAT1,NMNAT3,BST1,ligA
THIENO[3,2-B]PYRIDINE-2-SULFONIC-ACID-[1-(1-AMINO-ISOQUINOLIN-7-YLMETHYL)-2-OXO-PYRROLDIN-3-YL]-AMIDE	2	DB07261	-7.91763	0.33595	6.5647	453.549	5.70965	478	3283	381	1349	947.674	688	842.444	650	NA	F10
N-(3-Cyclopropyl(5,6,7,8,9,10-Hexahydro-2-Oxo-2h-Cycloocta[B]Pyran-3-Yl)Methyl)Phenylbenzensulfonamide	0	DB02033	-8.86665	0.14512	6.68354	479.598	5.70934	95	4271	263	1350	616.078	310	474.318	258	NA	gag-pol
3-[4-(2-METHYL-IMIDAZO[4,5-C]PYRIDIN-1-YL)BENZYL]-3H-BENZOTHIAZOL-2-ONE	0	DB07578	-8.40055	0.30417	6.46581	372.453	5.70848	237	3480	500	1351	863.949	591	744.331	535	NA	gag-pol
IDD594	0	DB08084	-6.84484	0.27206	5.49469	416.243	5.70844	1684	3676	2245	1352	2081.99	2580	2404.24	2933	NA	AKR1B1
(3R)-3-(FLUOROMETHYL)-N-(3,3,3-TRIFLUOROPROPYL)-1,2,3,4-TETRAHYDROISOQUINOLINE-7-SULFONAMIDE	4	DB07798	-6.19343	0.84152	6.0956	340.342	5.70665	2538	216	1103	1353	951.053	694	845.617	657	NA	PNMT
Flunarizine	1	DB04841	-7.3742	0.29952	5.74731	404.504	5.70646	969	3511	1802	1354	1697.39	1935	1830.22	2061	Flunarizine is a selective calcium entry blocker with calmodulin binding properties and histamine H1 blocking activity. It is effective in the prophylaxis of migraine, occlusive peripheral vascular disease, vertigo of central and peripheral origin, and as an adjuvant in the therapy of epilepsy.	CACNA1G,CACNA1H,CACNA1I,HRH1,CALM1
Heptulose-2-Phosphate	2	DB04195	-5.77325	0.39043	3.87421	274.162	5.70627	2979	2889	3899	1355	2596.74	3406	3225.45	3990	NA	PYGM
N-Acetyl-D-Galactosamine-6-Sulfate	1	DB02186	-5.96836	0.2769	3.96017	301.273	5.70622	2795	3643	3844	1356	2699.11	3554	3395.27	4153	NA	cslA,SP_0314
3-(6-CYCLOHEXYLMETHOXY-9H-PURIN-2-YLAMINO)-BENZENESULFONAMIDE	2	DB08248	-7.5562	0.8011	7.22144	402.48	5.7061	787	330	26	1357	309.393	87	189.011	54	NA	CCNA2,CDK2
(1S)-1-(1H-INDOL-3-YLMETHYL)-2-(2-PYRIDIN-4-YL-[1,7]NAPHTYRIDIN-5-YLOXY)-EHYLAMINE	9	DB07204	-7.28535	0.65588	6.70065	395.466	5.70608	1064	1024	249	1358	779.086	497	647.362	428	NA	PKIA,PRKACA
3-({4-[(6-CHLORO-1-BENZOTHIEN-2-YL)SULFONYL]-2-OXOPIPERAZIN-1-YL}METHYL)BENZENECARBOXIMIDAMIDE	0	DB08487	-7.6734	0.56081	6.40463	462.984	5.70607	678	1656	580	1359	969.917	729	866.774	682	NA	F10
N-(2,6-dimethylphenyl)-5-phenylimidazo[1,5-a]pyrazin-8-amine	0	DB08056	-7.39152	0.68702	6.45963	314.392	5.70569	947	864	507	1360	866.668	593	745.803	537	NA	LCK
2-[4-(4-Hydroxy-3-Isopropyl-Phenoxy)-3,5-Dimethyl-Phenyl]-2h-[1,2,4]Triazine-3,5-Dione	0	DB03181	-7.68744	0.09974	5.97533	367.405	5.70536	666	4404	1354	1361	1524.75	1621	1583.6	1684	NA	THRB
2-{4-[(4-imidazo[1,2-a]pyridin-3-ylpyrimidin-2-yl)amino]piperidin-1-yl}-N-methylacetamide	7	DB08026	-6.70377	0.58936	6.70357	365.441	5.70529	1900	1449	243	1362	977.015	745	874.6	693	NA	MAPK10
N-Allyl-Aniline	1	DB02870	-4.4805	0.58474	3.84472	133.194	5.7044	3906	1493	3912	1363	2361.41	3040	2836.16	3546	NA	E
Linezolid	2	DB00601	-6.82975	0.44312	5.56698	337.351	5.70383	1712	2513	2123	1364	1878.73	2240	2090.33	2455	Linezolid is a synthetic antibiotic, the first of the oxazolidinone class, used for the treatment of infections caused by multi-resistant bacteria including streptococcus and methicillin-resistant Staphylococcus aureus (MRSA). The drug works by inhibiting the initiation of bacterial protein synthesis.	Not-Available
N-Ethylmaleimide	0	DB02967	-3.93469	0.62735	3.64127	125.127	5.70345	4151	1192	4040	1365	2285.52	2904	2713.96	3400	A sulfhydryl reagent that is widely used in experimental biochemical studies. [PubChem]	CLC
[(1-{2[(4-Carbamimidoyl-Phenylamino)-Methyl]-1-Methyl-1h-Benzoimidazol-5-Yl}-Cyclopropyl)-Pyridin-2-Yl-Methyleneaminooxy]-Acetic-Acid-Ethyl-Ester	0	DB04107	-7.05583	0.05393	6.04853	525.613	5.70342	1367	4478	1202	1366	1780.54	2066	1945	2242	NA	PRSS1
S-Isopropyl-Isothiourea	2	DB04018	-3.04499	0.72085	3.50572	118.205	5.70325	4383	670	4144	1367	2019.57	2481	2300.15	2792	NA	NOS3
Bepotastine	0	DB04890	-6.603	0.17727	5.67866	388.895	5.70323	2025	4136	1930	1368	2168.51	2727	2528.45	3116	Bepotastine is a non-sedating, selective antagonist of the histamine 1 (H1) receptor. Bepotastine was approved in Japan for use in the treatment of allergic rhinitis and uriticaria/puritus in July 2000 and January 2002, respectively, and is marketed by Tanabe Seiyaku Co., Ltd. under the brand name Talion. It is available in oral and opthalmic dosage forms in Japan. The opthalmic solution is FDA a…	HRH1
Pyruvoyl-Group	1	DB03587	-2.49841	0.84129	2.92036	72.063	5.70302	4453	217	4431	1369	1555.98	1681	1623.82	1746	An organic compound used often as a reagent in organic synthesis, as a flavoring agent, and in tanning. It has been demonstrated as an intermediate in the metabolism of acetone and its derivatives in isolated cell preparations, in various culture media, and in vivo in certain animals. [PubChem]	PLA2G1B
Carboxymethylenecysteine	2	DB04339	-4.02216	0.40106	3.40841	179.197	5.70288	4123	2821	4207	1370	2861.39	3758	3657.6	4355	Carbocisteine is a mucolytic that reduces the viscosity of sputum to relieve the symptoms of chronic obstructive pulmonary disorder (COPD) and bronchiectasis through easier expulsion of mucus. Carbocisteine should not be used with antitussives (cough suppressants) or medicines that dry up bronchial secretions as they are functional antagonists. Carbocisteine is produced by alkylation of cysteine …	GSTP1
(2S)-2-amino-5-oxo-5-[(4-phenylmethoxyphenyl)amino]pentanoic-acid	0	DB07102	-7.00825	0.66406	5.82614	328.368	5.70268	1444	986	1636	1371	1336.8	1293	1325.59	1286	NA	LTA4H
IDD552	1	DB02834	-7.16608	0.49561	6.27034	414.336	5.70253	1217	2127	780	1372	1290.11	1225	1263.91	1191	NA	AKR1B1
Meta-Tyrosine	4	DB03552	-5.12313	0.50395	4.0572	181.191	5.70201	3496	2063	3766	1373	2471.19	3210	3005.96	3753	NA	TH
3-Hydroxyphenylalanine	6	DB03552	-5.0992	0.37314	3.89741	181.191	5.70201	3517	2996	3880	1374	2737.68	3611	3444.94	4194	NA	TH
6-Hydroxy-6-Methyl-Heptan-3-One	0	DB03711	-4.25825	0.7024	3.98825	144.214	5.70143	4017	764	3818	1375	2003.47	2453	2271.31	2756	NA	LCN9
(2r)-Amino(4-Hydroxyphenyl)Acetic-Acid	0	DB04291	-5.47033	0.68225	4.01622	167.164	5.70134	3246	888	3796	1376	1969.82	2400	2220.05	2674	Oxfenicine in an inhibitor of myocardial metabolism of nonesterified fatty acids (NEFA).	NA
(2s)-Amino(4-Hydroxyphenyl)Acetic-Acid	0	DB04291	-5.52572	0.5174	3.78854	167.164	5.70134	3203	1963	3950	1377	2418.25	3127	2917.59	3635	Oxfenicine in an inhibitor of myocardial metabolism of nonesterified fatty acids (NEFA).	NA
4-Hydroxyphenylglycine	0	DB04291	-5.52726	0.49622	3.75289	167.164	5.70134	3201	2120	3966	1378	2467.78	3202	2996.8	3738	Oxfenicine in an inhibitor of myocardial metabolism of nonesterified fatty acids (NEFA).	NA
Cp-166572,-2-Hydroxymethyl-4-(4-N,N-Dimethylaminosulfonyl-1-Piperazino)-Pyrimidine	1	DB04478	-5.73096	0.50197	5.46982	301.372	5.7008	3019	2074	2283	1379	2107.1	2626	2426.94	2968	NA	SORD
Para-Bromobenzyl-Alcohol	4	DB02822	-4.27292	0.58182	3.56444	187.036	5.70033	4013	1508	4099	1380	2418.84	3129	2916.42	3633	NA	ADH1C
1-(thiophen-2-ylacetyl)-4-(3-thiophen-2-yl-1,2,4-oxadiazol-5-yl)piperidine	0	DB08471	-6.96787	0.26759	5.93514	359.476	5.69994	1510	3705	1433	1381	1824.11	2148	2001.41	2314	NA	ethR
Oxyphencyclimine	3	DB00383	-6.65545	0.30546	5.5581	344.455	5.69847	1963	3470	2144	1382	2119.56	2648	2444.32	2996	Oxyphencyclimine is an anticholinergic drug (trade name Daricon) used in treating peptic ulcers.	CHRM3,CHRM1,CHRM2
2-[3,5-DICHLORO-4-(2-{2-[2(2-MERCAPTOETHOXY)ETHOXY]ETHOXY}ETHOXY)PHENYLAMINO]BENZOIC-ACID	3	DB04756	-6.67354	0.47928	5.6833	330.123	5.69806	1938	2257	1920	1383	1846.09	2193	2032.65	2357	NA	NA
3-{[(2,2-DIOXIDO-1,3-DIHYDRO-2-BENZOTHIEN-5-YL)AMINO]METHYLENE}-5-(1,3-OXAZOL-5-YL)-1,3-DIHYDRO-2H-INDOL-2-ONE	0	DB08124	-8.19007	0.2536	5.91257	393.424	5.69746	313	3783	1478	1384	1247.52	1150	1205.09	1098	NA	CDK2
N-{3-[5-(1H-1,2,4-triazol-3-yl)-1H-indazol-3-yl]phenyl}furan-2-carboxamide	1	DB07020	-7.86123	0.95068	6.64824	370.372	5.69743	514	18	287	1385	246.259	55	138.475	35	NA	MAPK9
2-PHENYLAMINO-4-METHYL-5-ACETYL-THIAZOLE	1	DB08359	-5.68724	0.33622	5.07932	232.308	5.69739	3053	3282	2836	1386	2505.15	3262	3051.57	3805	NA	fabB
Riboflavin	9	DB00140	-6.80416	0.4433	5.89256	376.369	5.69711	1756	2512	1516	1387	1745.14	2009	1884	2136	Nutritional factor found in milk, eggs, malted barley, liver, kidney, heart, and leafy vegetables. The richest natural source is yeast. It occurs in the free form only in the retina of the eye, in whey, and in urine; its principal forms in tissues and cells are as flavin mononucleotide and flavin-adenine dinucleotide.	RFK,ribE,BLVRB
3-(3-FLUORO-4-HYDROXYPHENYL)-7-HYDROXY-1-NAPHTHONITRILE	0	DB06875	-7.7411	0.44755	5.65624	279.27	5.69654	619	2474	1976	1388	1431.58	1450	1446.41	1459	NA	ESR2,NCOA1
2'-Deoxyguanosine-5'-Monophosphate	2	DB04457	-7.0596	0.57542	5.28455	347.224	5.69648	1359	1555	2563	1389	1656.15	1866	1756.17	1933	NA	1,thyA
Terazosin	0	DB01162	-6.91767	0.07727	5.34902	387.44	5.69629	1584	4451	2470	1390	2218.1	2807	2592.01	3204	Terazosin is a quinazoline derivative alpha-1-selective adrenergic blocking agent indicated for benign prostatic hyperplasia and hypertension[FDA Label][A176831]. Terazosin blocks adrenaline's action on alpha-1 adrenergic receptors, causing relaxation of smooth muscle in blood vessels and the prostate[A176837].	ADRA1A,ADRA1B,ADRA1D,KCNH2,KCNH6,KCNH7
6-[N-(1-Isopropyl-3,4-Dihydro-7-Isoquinolinyl)Carbamyl]-2-Naphthalenecarboxamidine	0	DB02473	-8.5397	0.3228	6.09097	384.483	5.69605	185	3362	1117	1391	991.488	763	885.675	704	NA	PLAU
2-Carboxyethylphosphonic-Acid	5	DB03379	-3.67465	0.49875	3.3362	154.058	5.69583	4238	2104	4241	1392	2693.57	3545	3356.54	4113	NA	TPI1
(R)-2-Hydroxy-3-Sulfopropanoic-Acid	0	DB02334	-3.96976	0.49952	2.95042	170.142	5.6954	4137	2097	4422	1393	2703.73	3560	3372.62	4127	NA	comB
PANTOTHENYL-AMINOETHANOL-11-PIVALIC-ACID	2	DB08328	-5.79936	0.33745	5.11936	346.424	5.69437	2946	3277	2785	1394	2474.28	3217	2995.79	3737	NA	phbA
Zanamivir	3	DB00558	-6.2317	0.14802	4.56394	332.313	5.6943	2491	4260	3343	1395	2652.31	3489	3285.79	4050	A guanido-neuraminic acid that is used to inhibit neuraminidase.	NA,NA,NEU2
3-(4-Phenylamino-Phenylamino)-2-(1h-Tetrazol-5-Yl)-Acrylonitrile	1	DB04430	-6.67643	0.67235	6.13461	303.329	5.69422	1931	941	1013	1396	1266.1	1189	1225.54	1130	NA	bla,bla
(2S)-2-{3-[({[2-fluoro-4-(trifluoromethyl)phenyl]carbonyl}amino)methyl]-4-methoxybenzyl}butanoic-acid	3	DB07070	-7.10182	0.44547	6.10271	427.394	5.69419	1296	2496	1087	1397	1488.74	1567	1520.64	1578	NA	PPARD
PYRIMIDINE-4,6-DICARBOXYLIC-ACID-BIS-[(PYRIDIN-3-YLMETHYL)-AMIDE]	0	DB04761	-6.95519	0.72986	5.85067	348.366	5.69409	1530	633	1588	1398	1210.91	1095	1154.29	1023	NA	MMP13
S-Acetonylcysteine	1	DB03858	-4.30328	0.73158	4.0022	177.225	5.69346	3996	622	3809	1399	1907.7	2292	2115.48	2498	NA	NA
Clonitazene	0	DB01523	-6.58624	0.80645	7.01311	386.883	5.69343	2050	308	64	1400	487.7	197	343.159	150	NA	NA
9-CYCLOPENTYL-6-[2-(3-IMIDAZOL-1-YL-PROPOXY)-PHENYLAMINO]-9H-PURINE-2-CARBONITRILE	0	DB07967	-7.23558	0.54467	6.9981	428.5	5.69314	1132	1781	71	1401	669.193	366	523.106	299	NA	CTSK
N-Hydroxy-1n(4-Methoxyphenyl)Sulfonyl-4-(Z,E-N-Methoxyimino)Pyrrolidine-2r-Carboxamide	3	DB01877	-6.10868	0.57452	5.6772	345.377	5.69303	2631	1562	1932	1402	1826.58	2156	1994.97	2307	NA	MMP3
Thymidine-5'-Phosphate	0	DB01643	-6.897	0.52736	4.92659	322.21	5.69281	1613	1887	3016	1403	1894.41	2261	2093.85	2463	5-Thymidylic acid. A thymine nucleotide containing one phosphate group esterified to the deoxyribose moiety.	tmk,DTYMK,TK,Not-Available,dnaQ,rmlA,TYMS,thyA,topA
Benzenesulfonyl	5	DB03848	-4.07428	0.69142	3.77045	142.179	5.69257	4095	836	3957	1404	2088.33	2592	2383.83	2903	NA	NR1H2
Atomoxetine	4	DB00289	-5.86001	0.37084	4.98451	255.361	5.69202	2892	3020	2951	1405	2453.09	3181	2953.87	3678	"Atomoxetine is a selective norepinephrine (NE) reuptake inhibitor used for the treatment of attention deficit hyperactivity disorder (ADHD). Also known as the marketed product Strattera, atomoxetine is used with other treatment modalities (psychological, educational, cognitive behaviour therapy, etc) to improve developmentally inappropriate symptoms associated with ADHD including distractibility…	SLC6A2,SLC6A4
4-[3-(4-chlorophenyl)-2,1-benzisoxazol-5-yl]pyrimidin-2-amine	0	DB08707	-8.1215	0.60574	6.42081	322.755	5.69193	352	1331	562	1406	780.029	499	640.942	418	NA	PIM1
Methylergonovine	0	DB00353	-7.48363	0.30336	6.16597	339.439	5.69141	852	3486	954	1407	1413.03	1428	1415.05	1417	A homolog of ergonovine containing one more CH2 group. (Merck Index, 11th ed)	DRD1
Indirubin-5-Sulphonate	0	DB02519	-8.62562	0.60928	5.7171	342.332	5.69114	161	1306	1854	1408	860.737	586	730.51	524	NA	PYGM,CRK2
beta-phenyl-D-phenylalanyl-N-propyl-L-prolinamide	5	DB07083	-6.63846	0.20469	5.8505	379.504	5.69066	1986	4020	1589	1409	2056.17	2543	2332.26	2830	NA	F2
S-propylamine-L-cysteine	0	DB04648	-4.23021	0.35265	3.6442	164.274	5.69036	4029	3171	4039	1410	2920.6	3825	3722.97	4403	NA	ARG1
3-(5-Amino-7-Hydroxy-[1,2,3]Triazolo[4,5-D]Pyrimidin-2-Yl)-N-(3,5-Dichlorobenzyl)-Benzamide	4	DB03571	-7.76821	0.28534	5.92035	430.255	5.68995	591	3590	1467	1411	1447.64	1488	1460.06	1482	NA	folB
5,6-dichloro-1-beta-D-ribofuranosyl-1H-benzimidazole	2	DB08473	-6.72306	0.84408	5.81515	319.144	5.68989	1872	213	1655	1412	982.493	754	870.618	690	NA	CSNK2A1
METHYL-N-[(2S,3R)-3-AMINO-2-HYDROXY-3-(4-METHYLPHENYL)PROPANOYL]-D-ALANYL-D-LEUCINATE	1	DB08669	-6.65794	0.23445	5.37574	393.484	5.68903	1958	3879	2418	1413	2257.01	2864	2638.33	3276	NA	map
2,5-Dimethoxyamphetamine	3	DB01465	-4.82438	0.54697	4.04784	195.262	5.68884	3693	1764	3776	1414	2428.51	3142	2908.28	3624	NA	NA
Pimozide	0	DB01100	-8.32397	0.28339	6.94057	461.556	5.68821	259	3599	102	1415	605.633	298	456.416	242	A diphenylbutylpiperidine that is effective as an antipsychotic agent and as an alternative to haloperidol for the suppression of vocal and motor tics in patients with Tourette syndrome. Although the precise mechanism of action is unknown, blockade of postsynaptic dopamine receptors has been postulated. (From AMA Drug Evaluations Annual, 1994, p403)	DRD2,DRD3,KCNH2,CALM1
Minaprine	0	DB00805	-6.70077	0.7165	5.99364	298.39	5.68816	1904	701	1318	1416	1256.29	1171	1207.17	1104	Minaprine is a psychotropic drug which has proved to be effective in the treatment of various depressive states. Like most antidepressants minaprine antagonizes behavioral despair. Minaprine is an amino-phenylpyridazine antidepressant reported to be relatively free of cardiotoxicity, drowsiness, and weight gain.	MAOA,HTR2B,HTR2A,HTR2C,ACHE,SLC6A4,DRD1,DRD2,CHRM1
Balanol	0	DB04098	-9.48897	0.15335	5.726	550.52	5.68742	21	4240	1840	1417	694.134	391	547.185	324	NA	PRKACA
N-Hydroxy-1-(4-Methoxyphenyl)Sulfonyl-4-Benzyloxycarbonyl-Piperazine-2-Carboxamide	0	DB04232	-7.06124	0.28115	5.62833	449.485	5.68718	1357	3618	2027	1418	1938.18	2343	2150.97	2569	NA	MMP3
Al7089a	4	DB02220	-6.86709	0.66201	6.15614	403.507	5.68683	1661	999	974	1419	1230.61	1125	1173.54	1050	NA	CA2
TRAZEOLIDE	4	DB08647	-6.8378	0.32556	6.20939	316.441	5.68678	1695	3348	866	1420	1625.33	1805	1700.16	1844	NA	IGKC
Ofloxacin	1	DB01165	-7.20291	0.15722	5.75073	361.373	5.68585	1170	4222	1793	1421	1883.52	2249	2069	2412	A synthetic fluoroquinolone (fluoroquinolones) antibacterial agent that inhibits the supercoiling activity of bacterial DNA gyrase, halting DNA replication.	parC,gyrA,TOP2A
1-Ethoxy-2-(2-Methoxyethoxy)Ethane	0	DB03508	-3.09008	0.54833	3.2741	148.202	5.6853	4376	1753	4284	1422	2614.58	3432	3203.09	3966	NA	NA
Nalbuphine	4	DB00844	-8.62438	0.29318	5.66353	357.45	5.68506	162	3544	1962	1423	1125.2	972	1040.49	891	A narcotic used as a pain medication. It appears to be an agonist at kappa opioid receptors and an antagonist or partial agonist at mu opioid receptors. Nalbuphine is the only opioid analgesic that is not a controlled substance in the United States.	OPRK1,OPRM1,OPRD1
Mestranol	0	DB01357	-8.25475	0.60066	6.35803	310.437	5.68469	289	1369	648	1424	777.314	493	635.271	412	The 3-methyl ether of ethinyl estradiol. It must be demethylated to be biologically active. It is used as the estrogen component of many combination ORAL contraceptives.	ESR1
Cyclohexanone	0	DB02060	-3.77696	0.68747	3.35282	98.145	5.68374	4203	861	4237	1425	2162.02	2719	2484.32	3043	Cyclohexanone (also known as oxocyclohexane, pimelic ketone, ketohexamethylene, cyclohexyl ketone or ketocyclohexane) is a six-carbon cyclic molecule with a ketone functional group. It is a colorless, oily liquid with an acetone-like smell.	onr
2-Amino-6-Oxo-Hexanoic-Acid	0	DB02571	-4.30507	0.37156	3.50586	145.158	5.68342	3995	3006	4143	1426	2902.25	3808	3677.96	4373	NA	ansB
PHENYLAMINOIMIDAZO(1,2-ALPHA)PYRIDINE	0	DB04607	-8.30669	0.7694	7.03945	461.33	5.6831	263	437	57	1427	310.945	88	187.113	52	NA	CDK2
4-(2-amino-1,3-thiazol-4-yl)pyrimidin-2-amine	0	DB08075	-5.252	0.93805	4.92985	193.235	5.6831	3405	35	3009	1428	845.929	566	710.454	501	NA	accC
N,4-dimethyl-3-[(1-phenyl-1H-pyrazolo[3,4-d]pyrimidin-4-yl)amino]benzamide	0	DB08242	-7.97754	0.75489	6.68079	358.405	5.6821	439	501	267	1429	538.222	235	388.691	184	NA	MAPK14
Quinacrine	3	DB01103	-6.20363	0.46551	6.4665	399.966	5.68131	2528	2357	498	1430	1435.24	1458	1437	1448	An acridine derivative formerly widely used as an antimalarial but superseded by chloroquine in recent years. It has also been used as an anthelmintic and in the treatment of giardiasis and malignant effusions. It is used in cell biological experiments as an inhibitor of phospholipase A2.	Not-Available,PLA2G6,PLA2G4A,PLCL1
Cholecalciferol	3	DB00169	-7.93646	0.55849	6.70179	384.648	5.68045	465	1681	246	1431	724.267	426	577.19	357	"Vitamin D, in general, is a secosteroid generated in the skin when 7-dehydrocholesterol located there interacts with ultraviolet irradiation - like that commonly found in sunlight [L5689]. Both the endogenous form of vitamin D (that results from 7-dehydrocholesterol transformation), vitamin D3 (cholecalciferol), and the plant-derived form, vitamin D2 (ergocalciferol), are considered the main for…	VDR
Ivacaftor	2	DB08820	-7.04991	0.37065	6.51489	392.499	5.68034	1383	3022	437	1432	1271.7	1198	1222.36	1127	"Ivacaftor (also known as Kalydeco or VX-770) is a drug used for the management of Cystic Fibrosis (CF). It is manufactured and distributed by Vertex Pharmaceuticals. It was approved by the Food and Drug Administration on January 31, 2012[L768], and by Health Canada in late 2012.[L6841] Ivacaftor is administered as a monotherapy and also administered in combination with other drugs for the manage…	CFTR
(1R)-2-[(CYANOMETHYL)AMINO]-1-({[2-(DIFLUOROMETHOXY)BENZYL]SULFONYL}METHYL)-2-OXOETHYL-MORPHOLINE-4-CARBOXYLATE	1	DB08195	-6.35886	0.51108	5.99109	461.443	5.67979	2338	1998	1324	1433	1725.41	1982	1835.59	2071	NA	CTSS
Sparsomycin	0	DB04222	-6.71384	0.33527	5.33152	361.445	5.67952	1886	3286	2496	1434	2170.2	2731	2491.64	3051	An antitumor antibiotic produced by Streptomyces sparsogenes. It inhibits protein synthesis in 70S and 80S ribosomal systems. [PubChem]	NA
N-Alpha-(2-Naphthylsulfonyl)-N(3-Amidino-L-Phenylalaninyl)-4-Acetyl-Piperazine	0	DB04125	-8.99683	0.54118	6.8245	507.616	5.67918	67	1803	155	1435	404.868	139	265.543	95	NA	PRSS1
Thioguanine	0	DB00352	-4.75965	0.79293	4.27228	167.197	5.67847	3737	353	3621	1436	1618.34	1797	1684.13	1824	An antineoplastic compound which also has antimetabolite action. The drug is used in the therapy of acute leukemia.	Not-Available
(3r)-4-(P-Toluenesulfonyl)-1,4-Thiazane-3-Carboxylicacid-L-Phenylalanine-Ethyl-Ester	0	DB01712	-6.99343	0.23761	6.14252	476.62	5.67824	1469	3864	997	1437	1688.7	1915	1782.04	1974	NA	FKBP1A
2-({4-[(5-CHLORO-1H-INDOL-2-YL)SULFONYL]PIPERAZIN-1-YL}CARBONYL)THIENO[3,2-B]PYRIDINE-4-OXIDE	0	DB07605	-7.97736	0.22329	6.38628	476.967	5.67795	440	3943	607	1438	1109.32	951	1017.39	877	NA	F10
6-amino-2-[(1-naphthylmethyl)amino]-3,7-dihydro-8H-imidazo[4,5-g]quinazolin-8-one	0	DB08512	-8.73804	0.71365	6.63114	356.389	5.67765	122	715	305	1439	442.34	165	298.53	117	NA	tgt
Isopropamide	0	DB01625	-6.06908	0.1445	5.70544	353.53	5.6776	2674	4273	1874	1440	2356.44	3030	2776.86	3475	Isopropamide iodide is a long-acting quaternary anticholinergic drug. It is used in the treatment of peptic ulcer and other gastrointestinal disorders marked by hyperacidity and hypermotility.	CHRM3,CHRM4
Cefixime	0	DB00671	-7.1443	0.05841	5.33416	453.458	5.67709	1247	4475	2489	1441	2115.13	2637	2403.78	2932	Cefixime, an antibiotic, is a third-generation cephalosporin like ceftriaxone and cefotaxime. Cefixime is highly stable in the presence of beta-lactamase enzymes. As a result, many organisms resistant to penicillins and some cephalosporins due to the presence of beta-lactamases, may be susceptible to cefixime. The antibacterial effect of cefixime results from inhibition of mucopeptide synthesis i…	mrdA
5-methyltetrahydrofolate	3	DB11256	-7.32789	0.04094	5.19348	459.463	5.677	1010	4494	2696	1442	2049.56	2531	2304.4	2796	Levomefolic acid (INN) is the metabolite of folic acid (Vitamin B9) and it is a predominant active form of folate found in foods and in the blood circulation, accounting for 98% of folates in human plasma [A19276]. It is transported across the membranes including the blood-brain barrier into various tissues where it plays an essential role in the DNA synthesis, cysteine cycle and regulation of ho…	NA
4-Phenylbutylamine	2	DB04311	-4.75979	0.61752	4.05718	149.237	5.67617	3736	1250	3767	1443	2244.63	2846	2600.78	3218	NA	PRSS1
Ethosuximide	0	DB00593	-4.69974	0.6783	3.83866	141.17	5.67568	3772	908	3916	1444	2097.81	2607	2375.93	2891	An anticonvulsant especially useful in the treatment of absence seizures unaccompanied by other types of seizures.	CACNA1G
3-[3-(4-methylpiperazin-1-yl)-7-(trifluoromethyl)quinoxalin-5-yl]phenol	0	DB07969	-8.51319	0.44636	6.26486	388.393	5.67556	192	2485	784	1445	857.438	579	720.523	513	NA	MET
8-(6-BROMO-BENZO[1,3]DIOXOL-5-YLSULFANYL)-9-(3-ISOPROPYLAMINO-PROPYL)-ADENINE	0	DB07877	-6.89183	0.62795	6.94004	465.377	5.67518	1621	1188	103	1446	731.815	437	583.193	366	NA	HSP90AB1,HSP90AA1
(S)-Des-Me-Ampa	1	DB01664	-4.70354	0.27929	3.63862	172.14	5.67518	3771	3626	4042	1447	2990.46	3895	3809.14	4432	NA	GRIA2
Dipivefrin	7	DB00449	-5.79779	0.61234	6.2396	351.443	5.67507	2947	1286	823	1448	1457.8	1510	1461.08	1485	Dipivefrin is a prodrug of adrenaline, which is used to treat glaucoma. It is available as ophthalmic solution (eye drops).	ADRA1A,ADRA2A,ADRB2,BCHE
(6-[4-(AMINOMETHYL)-2,6-DIMETHYLPHENOXY]-2-{[4-(AMINOMETHYL)PHENYL]AMINO}-5-BROMOPYRIMIDIN-4-YL)METHANOL	0	DB06874	-7.24174	0.23814	6.03361	450.296	5.67504	1123	3862	1228	1449	1666.73	1881	1746.35	1911	NA	gag-pol
(3r,4r,5r)-5-(Hydroxymethyl)Piperidine-3,4-Diol	3	DB04545	-4.25272	0.34616	3.00666	147.174	5.67477	4021	3213	4399	1450	3012.95	3923	3844.73	4444	NA	bglA,celA1,cel5A
(4R)-N-[4-({[2-(DIMETHYLAMINO)ETHYL]AMINO}CARBONYL)-1,3-THIAZOL-2-YL]-4-METHYL-1-OXO-2,3,4,9-TETRAHYDRO-1H-BETA-CARBOLINE-6-CARBOXAMIDE	0	DB07406	-7.88789	0.24328	6.01988	440.529	5.67469	502	3838	1257	1451	1369.16	1345	1342.91	1307	NA	MAPKAPK2
(4-BROMOPHENYL)[4-({(2E)-4-[CYCLOPROPYL(METHYL)AMINO]BUT-2-ENYL}OXY)PHENYL]METHANONE	0	DB08458	-6.49084	0.35605	5.84614	400.316	5.67279	2174	3136	1600	1452	1994.94	2439	2217.78	2664	NA	shc
6-(3-AMINOPHENYL)-N-(TERT-BUTYL)-2-(TRIFLUOROMETHYL)QUINAZOLIN-4-AMINE	0	DB07612	-7.73976	0.49617	6.54593	360.383	5.6722	622	2122	396	1453	933.521	669	805.521	600	NA	CDK2
N-cyclohexyl-3-[3-(trifluoromethyl)phenyl][1,2,4]triazolo[4,3-b]pyridazin-6-amine	6	DB08708	-7.59447	0.74274	6.49868	361.371	5.67207	753	565	455	1454	728.375	430	578.475	360	NA	PIM1
(2R)-N-HYDROXY-2-[(3S)-3-METHYL-3-{4-[(2-METHYLQUINOLIN-4-YL)METHOXY]PHENYL}-2-OXOPYRROLIDIN-1-YL]PROPANAMIDE	0	DB07145	-9.3193	0.81794	7.05668	433.508	5.67141	34	265	53	1455	162.355	30	78.1628	13	NA	ADAM17
6-ETHYL-5-[9-(3-METHOXYPROPYL)-9H-CARBAZOL-2-YL]PYRIMIDINE-2,4-DIAMINE	0	DB06967	-7.63692	0.4679	6.68703	375.476	5.67107	718	2333	261	1456	893.224	621	758.973	554	NA	REN
4-(1H-IMIDAZOL-1-YL)PHENOL	4	DB08214	-4.68176	0.80292	4.44921	160.176	5.67074	3784	321	3449	1457	1571.82	1709	1612.07	1725	NA	NOS2
5-(4-METHYL-BENZOYLAMINO)-BIPHENYL-3,4'-DICARBOXYLIC-ACID-3-DIMETHYLAMIDE-4'-HYDROXYAMIDE	1	DB07586	-7.67915	0.41945	5.98184	417.465	5.67054	673	2698	1347	1458	1374.19	1358	1347.33	1311	NA	HDAC8
3,4-dihydroxy-9,10-secoandrosta-1(10),2,4-triene-9,17-dione	0	DB08542	-8.60519	0.671	6.32987	316.397	5.67043	170	948	683	1459	633.043	332	479.247	263	NA	hsaC
Maleic-Acid	2	DB01677	-3.81012	0.49925	3.13413	116.072	5.66972	4192	2101	4346	1460	2734.15	3603	3370.12	4125	NA	mdh,fccA,SO_0970,ME2,FAH
[N-(BENZYLOXYCARBONYL)AMINO](4-AMIDINOPHENYL)METHANE-PHOSPHONATE	7	DB08763	-6.34274	0.13675	4.82415	363.31	5.66966	2358	4300	3114	1461	2606.13	3421	3160.65	3919	NA	PRSS1
6-amino-2-[(2-morpholin-4-ylethyl)amino]-3,7-dihydro-8H-imidazo[4,5-g]quinazolin-8-one	0	DB07564	-6.87749	0.20994	5.75438	329.364	5.66927	1644	3995	1782	1462	2033.85	2504	2270.43	2754	NA	tgt
2-(4-Morpholinyl)-8-Phenyl-4h-1-Benzopyran-4-One	0	DB02656	-7.46229	0.36609	5.42251	307.349	5.66899	870	3065	2359	1463	1741.73	2002	1845.98	2091	Specific inhibitor of phosphatidylinositol 3-kinase.	PIM1,PIK3CG
{[(2,6-difluorophenyl)carbonyl]amino}-N-(4-fluorophenyl)-1H-pyrazole-3-carboxamide	6	DB08138	-7.04893	0.39217	6.18852	360.295	5.66897	1385	2875	909	1464	1517.22	1612	1535.38	1601	NA	CDK2
9-Methyl-Uric-Acid	0	DB03293	-5.13993	0.61142	4.32257	182.139	5.66882	3486	1292	3573	1465	2203.51	2784	2524.69	3111	NA	NA
(4Z)-6-bromo-4-({[4-(pyrrolidin-1-ylmethyl)phenyl]amino}methylidene)isoquinoline-1,3(2H,4H)-dione	1	DB07156	-7.38264	0.5633	5.97772	426.314	5.6687	960	1641	1350	1466	1328.81	1278	1285.99	1222	NA	IGF1R
Oxyphenbutazone	1	DB03585	-6.86485	0.5323	6.03248	324.38	5.66852	1663	1857	1230	1467	1536.42	1648	1560.28	1646	Oxyphenbutazone was withdrawn from the Canadian market in March 1985 due to concerns regarding bone marrow suppression.	PLA2G2E
1-CHLORO-6-(4-HYDROXYPHENYL)-2-NAPHTHOL	5	DB07119	-7.45841	0.67097	5.50007	270.715	5.66838	877	949	2236	1468	1285.63	1215	1230.02	1134	NA	NCOA1,ESR2
4-(Methylsulfanyl)-2-Oxobutanoic-Acid	0	DB02238	-3.71066	0.51365	3.3285	148.183	5.66809	4226	1982	4249	1469	2688.97	3537	3289.32	4051	NA	Not-Available
1-(6-CYANO-3-PYRIDYLCARBONYL)-5',8'-DIFLUOROSPIRO[PIPERIDINE-4,2'(1'H)-QUINAZOLINE]-4'-AMINE	1	DB07405	-7.74788	0.62513	6.7116	382.374	5.66685	611	1207	234	1470	709.693	412	556.743	332	NA	NOS2
Daidzin	0	DB02115	-8.5117	0.57369	5.76704	416.382	5.66655	194	1573	1756	1471	942.252	680	812.241	610	NA	ALDH2
4'-[(1R)-1-amino-2-(2,5-difluorophenyl)ethyl]biphenyl-3-carboxamide	4	DB07181	-8.05736	0.52023	6.11586	352.384	5.66649	397	1933	1052	1472	1044.09	835	931.135	775	NA	DPP4
O-[2-(1,3-dioxo-1,3-dihydro-2H-isoindol-2-yl)ethyl]-(4-iodophenyl)thiocarbamate	0	DB08284	-7.0121	0.28326	5.78934	452.273	5.66629	1436	3600	1708	1473	1899.05	2269	2066.88	2410	NA	gag-pol
Ceftizoxime	7	DB01332	-6.00583	0.19925	5.56888	383.411	5.66599	2744	4048	2121	1474	2427.54	3140	2866.74	3579	A semisynthetic cephalosporin antibiotic which can be administered intravenously or by suppository. The drug is highly resistant to a broad spectrum of beta-lactamases and is active against a wide range of both aerobic and anaerobic gram-positive and gram-negative organisms. It has few side effects and is reported to be safe and effective in aged patients and in patients with hematologic disorder…	mecA,mrcA,mrcB,ftsI
Trimethadione	0	DB00347	-4.37724	0.74615	3.70595	143.142	5.66578	3964	544	3988	1475	1887.21	2252	2048.78	2379	An anticonvulsant effective in absence seizures, but generally reserved for refractory cases because of its toxicity. (From AMA Drug Evaluations Annual, 1994, p378)	CACNA1G
(2S)-2-(3-bromophenyl)-3-(5-chloro-2-hydroxyphenyl)-1,3-thiazolidin-4-one	4	DB08236	-6.55733	0.4184	5.59392	384.682	5.66557	2090	2704	2086	1476	2042.39	2515	2275.91	2763	NA	ARPC1B,ACTR2,ACTR3,ARPC2,ARPC3,ARPC4,ARPC5
1-(2-Fluorobenzyl)-3-Butyl-8-(N-Acetyl-4-Aminobenzyl)-Xanthine	1	DB02008	-7.33824	0.1274	6.57375	463.513	5.66529	997	4330	368	1477	1237.66	1132	1166.84	1040	NA	PCK1
3,5-Diiodotyrosine	0	DB03374	-5.76229	0.2375	4.73186	432.983	5.66448	2988	3866	3189	1478	2716.39	3577	3327.35	4087	A product from the iodination of MONOIODOTYROSINE. In the biosynthesis of thyroid hormones, diiodotyrosine residues are coupled with other monoiodotyrosine or diiodotyrosine residues to form T4 or T3 thyroid hormones (THYROXINE and TRIIODOTHYRONINE). [PubChem]	PKIA,PRKACA,BH0413,PRSS1,nikA,IYD
2-(1H-imidazol-1-yl)-9-methoxy-8-(2-methoxyethoxy)benzo[c][2,7]naphthyridin-4-amine	1	DB07300	-6.74097	0.68473	6.60556	365.393	5.66437	1846	877	333	1479	944.955	684	813.876	613	NA	PDPK1
Chlorphenesin	4	DB00856	-4.6748	0.52346	4.04201	202.637	5.66427	3790	1911	3779	1480	2522.81	3291	3013.65	3763	NA	NA
Gamma-Phenyl-Butyric-Acid	1	DB06819	-4.74751	0.34599	3.95893	164.204	5.66411	3745	3217	3845	1481	2877.99	3778	3591.42	4322	A monocarboxylic acid the structure of which is that of butyric acid substituted with a phenyl group at C-4. It is a histone deacetylase inhibitor that displays anticancer activity. It inhibits cell proliferation, invasion and migration and induces apoptosis in glioma cells. It also inhibits protein isoprenylation, depletes plasma glutamine, increases production of foetal haemoglobin through tran…	NA
1-cyclobutyl-3-(3,4-dimethoxyphenyl)-1H-pyrazolo[3,4-d]pyrimidin-4-amine	5	DB08053	-6.18019	0.64088	6.5087	325.372	5.6641	2551	1108	446	1482	1169.12	1034	1080.26	935	NA	SRC
Oxyphenisatin	5	DB04823	-7.43272	0.32247	5.97889	317.344	5.6639	912	3363	1349	1483	1573.87	1712	1605.38	1713	A laxative that undergoes enterohepatic circulation. It may cause jaundice.	NA
N-(tert-butyl)-4-[5-(pyridin-2-ylamino)quinolin-3-yl]benzenesulfonamide	3	DB06933	-7.13738	0.65802	6.85748	432.549	5.66387	1254	1013	139	1484	715.466	418	561.014	338	NA	MAPK10
methyl-L-phenylalaninate	0	DB06838	-4.93997	0.4328	4.225	179.219	5.6638	3619	2590	3652	1485	2670.15	3513	3246.93	4011	NA	pilE1,F2
N-[4-(benzyloxy)phenyl]glycinamide	0	DB07099	-6.3512	0.54501	5.14248	256.305	5.6634	2348	1778	2759	1486	2034	2505	2258.36	2733	NA	LTA4H
N-[N-[1-Hydroxycarboxyethyl-Carbonyl]Leucylamino-Butyl]-Guanidine	0	DB04276	-6.08491	0.13683	5.01987	360.435	5.66332	2656	4299	2914	1487	2652.16	3488	3216.34	3977	NA	srtB,CAPN1
(2S,3S)-3-{3-[4-(METHYLSULFONYL)PHENYL]-1,2,4-OXADIAZOL-5-YL}-1-OXO-1-PYRROLIDIN-1-YLBUTAN-2-AMINE	0	DB07067	-7.5684	0.71519	6.52357	378.454	5.66331	772	707	423	1488	765.588	480	613.469	396	NA	DPP4
Valpromide	6	DB04165	-3.80395	0.80614	4.85882	143.23	5.66313	4193	309	3091	1489	1562.68	1693	1588.04	1690	NA	limA
5-Methoxy-1,2-Dimethyl-3-(4-Nitrophenoxymethyl)Indole-4,7-Dione	3	DB02400	-6.68138	0.48963	5.88518	356.334	5.66281	1925	2176	1530	1490	1757.89	2034	1857.49	2109	NA	NQO1
3-ETHYL-2-(4-HYDROXYPHENYL)-2H-INDAZOL-5-OL	0	DB07712	-7.3462	0.81661	5.79463	254.289	5.66223	991	272	1698	1491	908.897	638	770.655	562	NA	ESR1,NCOA2
Hadacidin	0	DB02109	-3.50602	0.47148	2.83766	119.076	5.6617	4286	2308	4456	1492	2847.74	3741	3532.46	4279	NA	purA,ADSSL1,Adss
Nandrolone-phenpropionate	1	DB00984	-8.73749	0.43643	6.58897	406.566	5.66125	123	2559	347	1493	635.464	337	478.008	262	C18 steroid with androgenic and anabolic properties. It is generally prepared from alkyl ethers of estradiol to resemble testosterone but less one carbon at the 19 position. It is a schedule III drug in the U.S.	AR
ISOTHIAZOLIDINONE-ANALOG	0	DB08003	-7.7316	0.17151	6.40845	486.55	5.66117	629	4157	575	1494	1224.23	1115	1145.6	1010	NA	PTPN1
(5S)-2-{[(1S)-1-(2-fluorophenyl)ethyl]amino}-5-methyl-5-(trifluoromethyl)-1,3-thiazol-4(5H)-one	0	DB07310	-7.00256	0.63591	5.91537	320.311	5.6609	1451	1139	1473	1495	1381.21	1370	1345.23	1309	NA	HSD11B1
Glutamine-Hydroxamate	6	DB02446	-4.04893	0.33015	3.64504	162.145	5.66078	4111	3321	4037	1496	3013.36	3924	3805.62	4431	NA	glmS
AL7099A	6	DB03221	-6.81179	0.70078	6.18802	403.507	5.66017	1742	778	912	1497	1166.3	1030	1073.18	923	NA	CA2
3-(P-Tolyl)Propionic-Acid	5	DB03400	-4.86412	0.40391	4.07821	164.204	5.65985	3669	2801	3751	1498	2756.64	3640	3378.08	4134	NA	tyrB
(2E)-1-[2-hydroxy-4-methoxy-5-(3-methylbut-2-en-1-yl)phenyl]-3-(4-hydroxyphenyl)prop-2-en-1-one	0	DB07500	-7.77562	0.87213	6.30255	338.403	5.6597	585	144	723	1499	549.686	245	393.446	187	NA	PLA2G2E
6,4'-Dihydroxy-3-Methyl-3',5'-Dibromoflavone	0	DB01838	-8.08651	0.88797	6.74392	426.06	5.65959	374	114	210	1500	340.425	99	207.65	61	NA	NA
2-METHYL-FURAN-3-CARBOTHIOIC-ACID-[4-CHLORO-3-(3-METHYL-BUT-2-ENYLOXY)-PHENYL]-AMIDE	0	DB05871	-6.45035	0.70164	6.35752	335.856	5.65939	2216	771	650	1501	1136.26	985	1035.57	889	UC-781 is a thiocarboxanilide non-nucleoside reverse transcriptase inhibitor (NNRTI). It is a topical microbicide targeted against the AIDS virus.	NA
Trans-6-(2-Phenylcyclopropyl)-Naphthalene-2-Carboxamidine	3	DB03476	-7.95664	0.49321	5.62549	286.378	5.65935	451	2144	2033	1502	1310.85	1260	1252.7	1173	NA	PLAU
4-[4-(4-CHLORO-PHENOXY)-BENZENESULFONYLMETHYL]-TETRAHYDRO-PYRAN-4-CARBOXYLIC-ACID-HYDROXYAMIDE	0	DB08490	-7.82095	0.25032	5.9394	425.89	5.65836	541	3801	1431	1503	1450.19	1492	1433	1444	CTS-1027 has been used in trials studying the treatment of Hepatitis C and Chronic Hepatitis C Virus Infection.	MMP13
(17beta)-17-(cyanomethyl)-2-methoxyestra-1(10),2,4-trien-3-yl-sulfamate	0	DB07596	-8.19875	0.44186	6.68963	404.532	5.65835	311	2524	258	1504	742.898	456	587.25	370	NA	CA2
Terfenadine	1	DB00342	-7.89844	0.12085	6.11294	471.685	5.6577	490	4357	1059	1505	1358.17	1323	1312.48	1270	In the U.S., Terfenadine was superseded by fexofenadine in the 1990s due to the risk of cardiac arrhythmia caused by QT interval prolongation.	HRH1,KCNH2,CHRM3
Aldosterone	4	DB04630	-8.50365	0.72585	6.5182	360.45	5.65715	200	652	433	1506	540.005	236	383.638	180	A hormone secreted by the adrenal cortex that regulates electrolyte and water balance by increasing the renal retention of sodium and the excretion of potassium.	NR3C2
Temafloxacin	0	DB01405	-8.15076	0.13192	6.45327	417.387	5.65699	331	4310	515	1507	1025.79	809	902.341	731	Temafloxacin is an antibiotic agent belonging to the fluoroquinolone drug class. It was first approved for use in the U.S. market in 1992, but was withdrawn shortly due to the reports of serious adverse reactions, such as allergic reactions and hemolyric anemia, resulting in three deaths.	gyrA,parC
(2S)-3-(1-{[2-(2-CHLOROPHENYL)-5-METHYL-1,3-OXAZOL-4-YL]METHYL}-1H-INDOL-5-YL)-2-ETHOXYPROPANOIC-ACID	1	DB06908	-7.13115	0.20126	6.10199	438.911	5.6568	1260	4038	1089	1508	1700.17	1942	1769.52	1953	NA	NCOA1,PPARG
3-Sulfinoalanine	1	DB02153	-3.70345	0.47583	3.37395	153.159	5.65626	4227	2279	4232	1509	2800.61	3688	3441.71	4191	NA	def,Not-Available,mvaS,tthHB8IM,pdxY,blm,PAPOLA,aroH,GSR,luxS,clcD,dmsA,PRDX2
N-[(1S)-5-amino-1-(chloroacetyl)pentyl]-4-methylbenzenesulfonamide	0	DB08603	-6.11838	0.45725	5.77775	332.853	5.65587	2618	2410	1738	1510	2017.22	2476	2221.67	2678	NA	Not-Available
Para-Toluene-Sulfonate	0	DB03120	-5.12109	0.47733	3.87769	172.205	5.65499	3498	2271	3895	1511	2614.88	3435	3139.41	3901	NA	LYZ,CTSH
4-[[(1E)-2-(4-CHLOROPHENYL)ETHENYL]SULFONYL]-1-[[1-(4-PYRIDINYL)-4-PIPERIDINYL]METHYL]PIPERAZINONE	3	DB08745	-6.54722	0.27339	5.99331	475.014	5.65462	2104	3663	1320	1512	1980.4	2418	2166.8	2592	NA	F10
3-(4-Fluorophenyl)-1-Hydroxy-2-(Pyridin-4-Yl)-1h-Pyrrolo[3,2-B]Pyridine	0	DB02195	-7.39828	0.43787	6.19678	305.312	5.65298	944	2553	891	1513	1342.56	1300	1290.13	1232	NA	MAPK14
6-CHLORO-3-(DICHLOROMETHYL)-3,4-DIHYDRO-2H-1,2,4-BENZOTHIADIAZINE-7-SULFONAMIDE-1,1-DIOXIDE	0	DB08645	-6.86814	0.65699	5.83491	380.662	5.65258	1657	1019	1617	1514	1425.88	1445	1397.66	1389	NA	CA2
Sulfamethoxazole	1	DB01015	-5.79581	0.63342	5.06414	253.283	5.65196	2950	1156	2860	1515	1960.6	2378	2136.56	2543	A bacteriostatic antibacterial agent that interferes with folic acid synthesis in susceptible bacteria. Its broad spectrum of activity has been limited by the development of resistance. (From Martindale, The Extra Pharmacopoeia, 30th ed, p208)	folP,folC
ISOQUINOLINE-5-SULFONIC-ACID-(2-(2-(4-CHLOROBENZYLOXY)ETHYLAMINO)ETHYL)AMIDE	1	DB07947	-6.24725	0.65771	6.26465	419.934	5.65185	2481	1014	785	1516	1315.4	1264	1254.62	1177	NA	PRKACA,PKIA,AKT2,GSK3B
2-(Sec-Butyl)Thiazole	2	DB03087	-3.71186	0.84422	4.41296	141.239	5.65131	4225	211	3475	1517	1472.35	1534	1457.77	1479	NA	LCN9
Cyclohexylformamide	0	DB03559	-4.19351	0.58126	3.43278	127.187	5.65121	4047	1513	4192	1518	2498.42	3249	2949.84	3671	NA	ADH1C,ADH4
1,6-DI-O-PHOSPHONO-D-MANNITOL	2	DB04733	-5.66144	0.16981	3.92429	342.13	5.65099	3076	4167	3859	1519	2944.15	3846	3670.81	4365	NA	ALDOA
METHYL-1-(4-{[(2,4-DIAMINOPTERIDIN-6-YL)METHYL]AMINO}BENZOYL)PIPERIDINE-4-CARBOXYLATE	3	DB07689	-7.5103	0.45081	6.47135	436.476	5.65088	827	2456	491	1520	1109.6	953	999.091	848	NA	DHRS4L1
N-(2-CHLORO-4-FLUOROBENZOYL)-N'-(5-HYDROXY-2-METHOXYPHENYL)UREA	2	DB07968	-6.96131	0.70102	5.98855	338.722	5.65066	1520	775	1330	1521	1242.46	1143	1161.45	1030	NA	PYGL
Pantoprazole	2	DB00213	-6.44466	0.62556	6.15028	383.376	5.65054	2225	1204	985	1522	1415.64	1435	1381.86	1361	"Pantoprazole is a first-generation proton pump inhibitor (PPI) used for the management of gastroesophageal reflux disease (GERD), for gastric protection to prevent recurrence of stomach ulcers or gastric damage from chronic use of NSAIDs, and for the treatment of pathological hypersecretory conditions including Zollinger-Ellison (ZE) Syndrome. It can also be found in quadruple regimens for the t…	ATP4A
9-Butyl-8-(2-Chloro-3,4,5-Trimethoxy-Benzyl)-9h-Purin-6-Ylamine	0	DB03504	-6.69476	0.1614	6.40612	405.886	5.64985	1911	4204	578	1523	1630.75	1814	1668.34	1803	NA	HSP90AA1
(2S)-({(5Z)-5-[(5-ETHYL-2-FURYL)METHYLENE]-4-OXO-4,5-DIHYDRO-1,3-THIAZOL-2-YL}AMINO)(4-FLUOROPHENYL)ACETIC-ACID	7	DB08706	-6.50238	0.50899	6.00321	374.393	5.64941	2161	2016	1296	1524	1712.71	1958	1780.67	1971	NA	Not-Available
Benazepril	0	DB00542	-7.18173	0.24518	6.12086	424.497	5.64869	1198	3829	1044	1525	1643.91	1846	1685.57	1826	Benazepril, brand name Lotensin, is a medication used to treat high blood pressure (hypertension), congestive heart failure, and chronic renal failure[A838,A837]. Upon cleavage of its ester group by the liver, benazepril is converted into its active form benazeprilat, a non-sulfhydryl angiotensin-converting enzyme (ACE) inhibitor[A836].	ACE
2-amino-4-[2,4-dichloro-5-(2-pyrrolidin-1-ylethoxy)phenyl]-N-ethylthieno[2,3-d]pyrimidine-6-carboxamide	2	DB06969	-6.75863	0.50837	7.07314	480.421	5.64847	1819	2023	52	1526	735.1	443	576.25	355	NA	HSP90AA1
Roxatidine-acetate	0	DB08806	-6.13653	0.09484	5.01541	348.443	5.64834	2596	4410	2916	1527	2672.04	3517	3219.91	3984	Roxatidine acetate is a specific and competitive H2 receptor antagonist. It is currently approved in South Africa under the tradename Roxit.	HRH2
Primaquine	1	DB01087	-5.68509	0.25806	5.48994	259.353	5.64826	3056	3756	2253	1528	2507.21	3268	2957.2	3681	An aminoquinoline that is given by mouth to produce a radical cure and prevent relapse of vivax and ovale malarias following treatment with a blood schizontocide. It has also been used to prevent transmission of falciparum malaria by those returning to areas where there is a potential for re-introduction of malaria. Adverse effects include anemias and GI disturbances. (From Martindale, The Extra …	Not-Available,KRT7,NQO2
Compound-9	7	DB02014	-6.75286	0.63846	6.01479	413.357	5.64567	1827	1122	1265	1529	1411.1	1422	1373.85	1345	NA	PTPN1
2-MERCAPTO-N-[1,2,3,10-TETRAMETHOXY-9-OXO-5,6,7,9-TETRAHYDRO-BENZO[A]HEPTALEN-7-YL]ACETAMIDE	0	DB07574	-7.12249	0.35066	6.27858	431.51	5.64526	1267	3187	765	1530	1474.44	1541	1456.38	1475	NA	STMN4,TUBB2B,TUBA1A,TUBA1C,TUBA1B
4-{[(E)-2-(5-CHLOROTHIEN-2-YL)VINYL]SULFONYL}-1-(1H-PYRROLO[3,2-C]PYRIDIN-2-YLMETHYL)PIPERAZIN-2-ONE	0	DB08488	-7.14603	0.37266	5.95277	436.946	5.64525	1243	2999	1404	1531	1682.47	1908	1736.22	1898	NA	F10
[4-(4-Hydroxy-3-Iodo-Phenoxy)-3,5-Diiodo-Phenyl]-Acetic-Acid	5	DB03604	-5.8223	0.462	6.29647	621.934	5.64418	2925	2378	736	1532	1673.47	1891	1723.48	1875	A metabolite of T3 and T4 thyroid hormones; promoted for hyperlipidemia, localized lipodystrophy, and obesity. Tiratricol has been used in trials studying the treatment of Allan-Herndon-Dudley Syndrome.	THRB
N-[7-(3-AMINOPHENYL)-5-METHOXY-1,3-BENZOXAZOL-2-YL]-2,5-DICHLOROBENZENESULFONAMIDE	1	DB07270	-7.80025	0.6457	7.0239	464.33	5.64418	561	1079	61	1533	487.769	198	332.995	140	NA	FBP1
N-(4-carbamimidoylbenzyl)-1-(3-phenylpropanoyl)-L-prolinamide	0	DB06942	-7.44545	0.46219	6.28147	378.476	5.64412	898	2376	761	1534	1256.27	1170	1175.36	1054	N-(4-carbamimidoylbenzyl)-1-(3-phenylpropanoyl)-l-prolinamide is a solid. This compound belongs to the alpha amino acid amides. These are amide derivatives of alpha amino acids. This medication targets the protein prothrombin.	F2
Phenmetrazine	0	DB00830	-5.33329	0.37176	4.27767	177.247	5.64334	3343	3004	3617	1535	2732.58	3600	3311.78	4071	A sympathomimetic drug used primarily as an appetite depressant. Its actions and mechanisms are similar to dextroamphetamine.	SLC6A2,SLC6A3
2,3,7,8-tetrahydroxychromeno[5,4,3-cde]chromene-5,10-dione	5	DB08846	-7.93599	0.27972	5.05082	302.194	5.64328	466	3621	2877	1536	1652.48	1861	1693.24	1835	Ellagic acid is present in several fruits such as cranberries, strawberries, raspberries, and pomegranates. In pomegranates, there are several therapeutic compounds but ellagic acid is the most active and abundant. Ellagic acid is also present in vegetables. Ellagic acid is an investigational drug studied for treatment of Follicular Lymphoma (phase 2 trial), protection from brain injury of intrau…	NA
Pantothenyl-Aminoethanol-Acetate-Pivalic-Acid	0	DB03045	-5.78995	0.32538	5.77248	388.461	5.64323	2957	3350	1747	1537	2270.99	2887	2586.6	3198	NA	phbA
R-Styrene-Oxide	8	DB04499	-3.99654	0.68131	3.63229	120.151	5.64286	4130	895	4047	1538	2190.11	2768	2463.97	3021	NA	hheC
Medrysone	5	DB00253	-8.61854	0.65356	6.45495	344.495	5.64177	166	1040	514	1539	607.905	302	446.034	232	Medrysone is a corticosteroid used in ophthalmology.	NR3C1
Phosphorylisopropane	7	DB03976	-3.24208	0.41827	3.234	140.075	5.64142	4338	2707	4310	1540	2971.28	3873	3699.01	4385	NA	PRSS1,PRSS2,CTRB1
N~2~-1,3-BENZOXAZOL-2-YL-3-CYCLOHEXYL-N-{2-[(4-METHOXYPHENYL)AMINO]ETHYL}-L-ALANINAMIDE	0	DB07839	-6.99101	0.19698	6.42188	436.556	5.64129	1474	4059	559	1541	1506.72	1594	1495.46	1529	NA	CTSS
N-ACETYL-L-PHENYLALANYL-4-[DIFLUORO(PHOSPHONO)METHYL]-L-PHENYLALANINAMIDE	0	DB07651	-7.40725	0.11259	5.42021	483.408	5.64077	934	4372	2362	1542	1963.8	2385	2128.64	2524	NA	PTPN1
Cilostazol	5	DB01166	-6.77912	0.67341	6.57708	369.469	5.6401	1788	935	360	1543	981.662	752	844.294	653	Cilostazol is a quinolinone derivative and antiplatelet agent with vasodilating properties that has been used in the symptomatic treatment of intermittent claudication in patients with peripheral ischaemia. It is marketed under the brand name Pletal by Otsuka Pharmaceutical Co.. Cilostazol works by inhibiting both primary and secondary aggregation and reducing calcium-induced contractions.	PDE3A
Dansylamide	5	DB02866	-5.69379	0.69141	5.16217	250.323	5.63989	3047	837	2730	1544	1810.72	2124	1909.5	2181	NA	CA2
N-[(2R,3S)-3-AMINO-2-HYDROXY-4-PHENYLBUTYL]-4-METHOXY-2,3,6-TRIMETHYLBENZENESULFONAMIDE	8	DB07527	-6.29107	0.27609	5.66046	392.521	5.63849	2422	3648	1965	1545	2275.78	2896	2589.39	3201	NA	F2
Cyclohexanol	1	DB03703	-3.96163	0.63151	3.19038	100.161	5.63797	4141	1167	4332	1546	2385.17	3080	2756.06	3446	Monohydroxy derivatives of cyclohexanes that contain the general formula R-C6H11O. They have a camphorlike odor and are used in making soaps, insecticides, germicides, dry cleaning, and plasticizers. [PubChem]	ADH1B
2-Phenyl-1-[4-(2-Piperidin-1-Yl-Ethoxy)-Phenyl]-1,2,3,4-Tetrahydro-Isoquinolin-6-Ol	0	DB04471	-7.89884	0.20698	6.09205	428.576	5.63768	489	4005	1112	1547	1354.8	1318	1296.2	1244	NA	ESR1
4-[(4-bromo-2-{[(3R,5S)-3,5-dimethylpiperidin-1-yl]carbonyl}phenyl)amino]-4-oxobutanoic-acid	3	DB08581	-6.40798	0.30124	5.75295	411.296	5.63765	2267	3497	1786	1548	2163.71	2720	2419.22	2955	NA	Not-Available
5-N-Allyl-Arginine	0	DB03892	-4.5451	0.23969	4.45904	215.277	5.63736	3873	3856	3438	1549	2986.31	3889	3716.75	4397	NA	NOS1
4-(4-FLUOROPHENYL)-1-CYCLOROPROPYLMETHYL-5-(4-PYRIDYL)-IMIDAZOLE	4	DB08522	-6.41243	0.91119	6.62531	293.345	5.63663	2263	76	314	1550	537.886	234	377.986	176	NA	MAPK14
Acetyldihydrocodeine	0	DB01538	-7.79179	0.45225	5.82786	343.423	5.63617	568	2448	1632	1551	1369.69	1347	1314.09	1271	NA	NA
6-CHLORO-2-(1-FURO[2,3-C]PYRIDIN-5-YL-ETHYLSULFANYL)-PYRIMIDIN-4-YLAMINE	0	DB08414	-6.8406	0.45512	6.1604	306.778	5.63609	1691	2427	965	1552	1574.56	1714	1582.15	1681	NA	gag-pol
2-Aminoquinazolin-4(3h)-One	2	DB03780	-5.41944	0.91677	4.62797	161.164	5.63592	3285	68	3278	1553	1032.66	822	901.331	728	NA	tgt
{4-[(2R)-pyrrolidin-2-ylmethoxy]phenyl}(4-thiophen-3-ylphenyl)methanone	7	DB07237	-6.63683	0.60396	5.68093	363.482	5.63543	1990	1346	1926	1554	1682.68	1909	1727.9	1884	NA	LTA4H
Cathinone	5	DB01560	-4.51954	0.43872	3.79432	149.193	5.63472	3887	2546	3946	1555	2791.52	3677	3392.68	4151	Cathinone is a monoamine alkaloid found in the shrub Catha edulis (Khat). Closely related to ephedrine, cathine and other amphetamines, it is probably the main contributor to the stimulant effect of Catha edulis. Cathinone differs from many other amphetamines in that its structure is a ketone. Other amphetamines to share this structure include the antidepressant bupropion and the stimulant methca…	NA
Amodiaquine	1	DB00613	-6.83644	0.82283	6.70882	355.869	5.63447	1698	259	235	1556	633.255	333	469.283	255	A 4-aminoquinoquinoline compound with anti-inflammatory properties.	Not-Available,HNMT
(RP,SP)-O-(2R)-(1-PHENOXYBUT-2-YL)-METHYLPHOSPHONIC-ACID-CHLORIDE	0	DB07990	-5.51413	0.45709	4.63612	262.673	5.63382	3211	2412	3270	1557	2505.9	3264	2936.67	3655	NA	lipA
Diethylthiambutene	0	DB01533	-5.43293	0.38006	5.96341	291.485	5.63362	3276	2957	1381	1558	2136.68	2673	2373.9	2884	NA	NA
Temozolomide	0	DB00853	-5.70903	0.91231	4.50754	194.154	5.63342	3037	73	3393	1559	1040.64	829	909.46	742	Temozolomide (Temodar and Temodal) is an oral alkylating agent used for the treatment of refractory anaplastic astrocytoma -- a type of cancerous brain tumor. Temozolomide is not active until it is converted at physiologic pH to the active form, 5-(3-methyltriazen-1-yl)imidazole-4-carboxamide (MTIC).	Not-Available
Triazolopyridine	0	DB04797	-7.44489	0.48682	6.39483	322.343	5.63321	901	2197	590	1560	1161.8	1025	1053.1	906	NA	MAPK14
N-(M-Trifluoromethylphenyl)-Phenoxazine-4,6-Dicarboxylic-Acid	0	DB02698	-8.47192	0.15776	5.73142	415.323	5.63292	210	4217	1831	1561	1261.33	1179	1174.82	1053	NA	NA
Bromodiphenhydramine	7	DB01237	-5.5261	0.59476	5.33322	334.257	5.63286	3202	1413	2492	1562	2048.56	2528	2242.35	2704	Bromodiphenhydramine is an ethanolamine antihistamine with antimicrobial property. Bromodiphenhydramine is used in the control of cutaneous allergies. Ethanolamine antihistamines produce marked sedation in most patients.	HRH1
Yohimbine	5	DB01392	-7.40404	0.31478	6.21579	354.45	5.63285	937	3414	856	1563	1438.33	1467	1399.03	1391	A plant alkaloid with alpha-2-adrenergic blocking activity. Yohimbine has been used as a mydriatic and in the treatment of impotence. It is also alleged to be an aphrodisiac.	HTR2C,ADRA2A,ADRA2B,ADRA2C,HTR1A,HTR1B,HTR1D,DRD2,DRD3,HTR2A
6-(3-BROMO-2-NAPHTHYL)-1,3,5-TRIAZINE-2,4-DIAMINE	6	DB07319	-6.77456	0.72072	5.64404	316.162	5.6327	1796	671	2003	1564	1393.92	1386	1341.44	1302	NA	HSP90AA1
CARBOBENZYLOXY-(L)-LEUCINYL-(L)LEUCINYL-METHOXYMETHYLKETONE	6	DB08526	-5.72247	0.22401	5.36288	408.539	5.63187	3029	3937	2439	1565	2597.45	3409	3075.33	3834	NA	CTSH
4-METHYL-N-METHYL-N-(2-PHENYL-2H-PYRAZOL-3-YL)BENZENESULFONAMIDE	0	DB07670	-6.83129	0.4062	5.84137	327.409	5.63162	1709	2780	1608	1566	1859.8	2216	1969.51	2274	NA	CYP2C18
4-NITROPHENYL-(6-S-ALPHA-D-XYLOPYRANOSYL)-BETA-D-GLUCOPYRANOSIDE	4	DB04807	-7.80196	0.21577	5.05527	449.434	5.63073	559	3972	2870	1567	1777.64	2062	1853.96	2105	NA	yicI
Cyclohexyl-pentyl-maltoside	0	DB04664	-7.64589	0.14417	4.59514	494.578	5.63029	709	4277	3315	1568	1992.52	2436	2158.19	2578	NA	CYP2B6
N-hydroxy-4-({4-[4-(trifluoromethyl)phenoxy]phenyl}sulfonyl)tetrahydro-2H-pyran-4-carboxamide	0	DB06945	-7.91707	0.1567	5.77501	445.415	5.63022	479	4225	1746	1569	1534.47	1645	1523.12	1583	N-hydroxy-4-({4-[4-(trifluoromethyl)phenoxy]phenyl}sulfonyl)tetrahydro-2H-pyran-4-carboxamide is a solid. This compound belongs to the diarylethers. These are organic compounds containing the dialkyl ether functional group, with the formula ROR', where R and R' are aryl groups. This substance is known to target a disintegrin and metalloproteinase with thrombospondin motifs 5.	ADAMTS5
2-{5-[3-(6-BENZOYL-1-PROPYLNAPHTHALEN-2-YLOXY)PROPOXY]INDOL-1-YL}ETHANOIC-ACID	0	DB04689	-8.01933	0.4848	7.03702	521.613	5.6302	415	2209	58	1570	537.518	233	376.031	175	NA	PPARG
N-[2-(2,4-diaminopyrido[2,3-d]pyrimidin-7-yl)-2-methylpropyl]-4-phenoxybenzamide	3	DB07041	-7.73117	0.26685	6.28619	428.496	5.62967	630	3711	753	1571	1289.59	1222	1207.47	1108	NA	ligA,ligA
N'-(6-aminopyridin-3-yl)-N-(2-cyclopentylethyl)-4-methyl-benzene-1,3-dicarboxamide	1	DB07537	-7.05481	0.20402	5.92757	366.465	5.6287	1370	4027	1446	1572	1881.83	2243	1998.13	2311	NA	KDR
(2-AMINO-3-PHENYL-BICYCLO[2	7	DB07883	-7.02859	0.43946	5.96889	291.394	5.62842	1414	2540	1369	1573	1667.65	1883	1700.44	1845	NA	IGHG1
2,5-Dimethoxy-4-ethylamphetamine	1	DB01467	-5.29051	0.29459	4.53646	223.316	5.6282	3375	3536	3370	1574	2820.69	3708	3426.14	4180	NA	NA
D-leucyl-N-(4-carbamimidoylbenzyl)-L-prolinamide	0	DB06996	-7.21858	0.40942	6.16844	359.474	5.6278	1154	2761	950	1575	1477.64	1543	1446.54	1460	NA	F2
Levofloxacin	0	DB01137	-7.28	0.33784	6.00847	361.373	5.62721	1073	3271	1281	1576	1631.54	1817	1650.48	1784	A synthetic fluoroquinolone (fluoroquinolones) antibacterial agent that inhibits the supercoiling activity of bacterial DNA gyrase, halting DNA replication.	parC,gyrA,TOP2A
3-Bromo-3-buten-1-ol	0	DB04592	-3.4288	0.36415	3.18242	151.003	5.62714	4302	3083	4334	1577	3085.61	3996	3859.32	4452	NA	mmoX
Naloxone	0	DB01183	-9.47445	0.44609	5.39585	327.38	5.62668	22	2488	2389	1578	673.983	373	507.571	285	"Naloxone is an opioid antagonist medication used to block or reverse the effects of opioid drugs, particularly within the setting of drug overdoses which are rapidly becoming a leading cause of death worldwide. More specifically, naloxone has a high affinity for 渭-opioid receptors, where it acts as an inverse agonist, causing the rapid removal of any other drugs bound to these receptors. When ta…	OPRM1,OPRD1,OPRK1,CREB1,ESR1
N-((2-aminopyrimidin-5-yl)methyl)-5-(2,6-difluorophenyl)-3-ethylpyrazolo[1,5-a]pyrimidin-7-amine	9	DB08538	-6.44607	0.24529	6.49745	381.39	5.62601	2222	3826	457	1579	1573.79	1711	1572.06	1666	NA	CDK2
[4-({4-[(5-cyclopropyl-1H-pyrazol-3-yl)amino]-6-(methylamino)pyrimidin-2-yl}amino)phenyl]acetonitrile	0	DB07168	-6.71412	0.74072	6.93718	360.425	5.62522	1885	579	105	1580	652.318	350	485.728	270	NA	CAMK2B
Cromoglicic-acid	0	DB01003	-8.53317	0.19064	5.52355	468.37	5.62487	188	4090	2200	1581	1278.82	1206	1191.52	1081	A chromone complex that acts by inhibiting the release of chemical mediators from sensitized mast cells. It is used in the prophylactic treatment of both allergic and exercise-induced asthma, but does not affect an established asthmatic attack.	KCNMA1,S100P
3-Chloro-9-Ethyl-6,7,8,9,10,11-Hexahydro-7,11-Methanocycloocta[B]Quinolin-12-Amine	0	DB04114	-7.86557	0.55116	6.312	298.817	5.62307	512	1729	710	1582	998.579	767	856.593	669	NA	ACHE
Tyrosinal	7	DB03978	-4.75906	0.61087	4.28609	165.192	5.62287	3738	1296	3602	1583	2292.54	2918	2593.76	3206	NA	tyrS,pcp,YARS,YARS
(3R,4R)-4-(pyrrolidin-1-ylcarbonyl)-1-(quinoxalin-2-ylcarbonyl)pyrrolidin-3-amine	1	DB07015	-7.33658	0.41233	6.34078	339.399	5.622	1001	2746	663	1584	1303.47	1246	1221.47	1125	NA	DPP4
(2R)-2-{[(4-FLUORO-3-METHYLPHENYL)SULFONYL]AMINO}-N-HYDROXY-2-TETRAHYDRO-2H-PYRAN-4-YLACETAMIDE	2	DB07290	-6.75548	0.3408	5.36459	346.38	5.62186	1822	3250	2437	1585	2186.9	2758	2434.61	2983	NA	lef
4-{[5-(CYCLOHEXYLMETHOXY)[1,2,4]TRIAZOLO[1,5-A]PYRIMIDIN-7-YL]AMINO}BENZENESULFONAMIDE	5	DB07685	-7.0236	0.59777	6.67004	402.48	5.62158	1418	1396	272	1586	961.299	707	813.536	612	NA	CDK2
3-BENZYLOXYCARBONYLAMINO-2-HYDROXY-4-PHENYL-BUTYRIC-ACID	1	DB08041	-6.56859	0.14125	4.54122	329.352	5.62107	2078	4287	3364	1587	2626.08	3453	3106.12	3872	NA	gag-pol
Protriptyline	6	DB00344	-6.36801	0.42313	5.52526	263.384	5.62104	2328	2669	2198	1588	2158	2709	2390.3	2910	Protriptyline hydrochloride is a dibenzocycloheptene-derivative tricyclic antidepressant (TCA). TCAs are structurally similar to phenothiazines. They contain a tricyclic ring system with an alkyl amine substituent on the central ring. In non-depressed individuals, protriptyline does not affect mood or arousal, but may cause sedation. In depressed individuals, protriptyline exerts a positive effec…	SLC6A2,SLC6A4
Brodimoprim-4,6-Dicarboxylate	0	DB02809	-6.73247	0.07082	5.87647	496.338	5.62056	1855	4465	1550	1589	2125.23	2658	2341.53	2843	Brodimoprim-4,6-dicarboxylate is a solid. This compound belongs to the anisoles. These are organic compounds contaiing a methoxybenzene or a derivative thereof. This medication is known to target the protein dihydrofolate reductase.	folA
Forasartan	0	DB01342	-6.91622	0.33927	6.72594	416.533	5.62047	1587	3262	222	1590	1162.66	1026	1047.46	901	Forasartan, a specific angiotensin II antagonist, is used alone or with other antihypertensive agents to treat hypertension. Forasartan competes with angiotensin II for binding at the AT1 receptor subtype. As angiotensin II is a vasoconstrictor which also stimulates the synthesis and release of aldosterone, blockage of its effects results in a decreases in systemic vascular resistance.	AGTR1
[4-(3-AMINOMETHYL-PHENYL)-PIPERIDIN-1-YL]-(5-PHENETHYL--PYRIDIN-3-YL)-METHANONE	8	DB04764	-7.49561	0.67698	6.90233	399.538	5.61975	839	914	120	1591	618.571	312	451.471	235	NA	TPSB2
N-Ethyl-5'-Carboxamido-Adenosine	8	DB03719	-6.38371	0.87074	5.35753	308.298	5.61899	2307	148	2445	1592	1073.7	894	941.592	784	A stable adenosine A1 and A2 receptor agonist. Experimentally, it inhibits cAMP and cGMP phosphodiesterase activity. [PubChem]	HSP90B1
N-[3-(2-fluoroethoxy)phenyl]-N'-(1,3,4-trioxo-1,2,3,4-tetrahydroisoquinolin-6-yl)butanediamide	1	DB08499	-7.24383	0.43395	5.68152	427.388	5.6188	1119	2580	1924	1593	1724.72	1980	1771	1957	NA	CASP3
Beta-hydroxy-3-methylfentanyl	0	DB01570	-7.15078	0.18541	5.54248	366.505	5.61781	1234	4109	2172	1594	2046.92	2522	2224.87	2681	Ohmefentanyl is an extremely potent opioid analgesic drug which selectively binds to the 碌-opioid receptor. The Chinese have recorded ohmefentanyl as having a potency that is 6,300 times morphine. Ohmefentanyl is one of the most potent 渭 -receptor agonists known, comparable to super-potent opioids such as carfentanil and etorphine which are used for tranquilizing large animals such as elephants i…	NA
Pravastatin	8	DB00175	-6.70375	0.37122	6.1785	424.534	5.61751	1901	3012	936	1595	1709.89	1954	1750	1918	"Pravastatin is the 6-alpha-hydroxy acid form of [mevastatin].[T303] Pravastatin was firstly approved in 1991 becoming the second available statin in the United States. It was the first statin administered as the active form and not as a prodrug.[T274] This drug was developed by Sankyo Co. Ltd.; however, the first approved pravastatin product was developed by Bristol Myers Squibb and FDA approved…	HMGCR
S-azabisabolene	0	DB02099	-5.78138	0.31674	5.0775	208.369	5.61748	2968	3395	2837	1596	2598.96	3412	3057.65	3811	NA	NA
3-Methylthiofentanyl	0	DB01439	-6.79839	0.31714	5.98367	356.535	5.61729	1766	3391	1342	1597	1892.75	2258	2003.04	2317	3-Methyl-thiofentanyl is a [fentanyl] analog and an opioid analgesic that works by inducing central nervous system (CNS) depression.	OPRM1,OPRD1,OPRK1
DIMETHYL-(4,5,6,7-TETRABROMO-1H-BENZOIMIDAZOL-2-YL)-AMINE	0	DB04719	-5.40231	0.36984	6.17953	476.792	5.61714	3295	3029	934	1598	1964.58	2387	2104.59	2482	NA	CSNK2A1
4-(2,5-Dichloro-Thiophen-3-Yl)-Pyrimidin-2-Ylamine	0	DB03019	-5.41987	0.45308	5.05757	246.122	5.61667	3284	2441	2867	1599	2462.13	3193	2843.15	3556	NA	CDK2
N-(2-(((5-CHLORO-2-PYRIDINYL)AMINO)SULFONYL)PHENYL)-4-(2-OXO-1(2H)-PYRIDINYL)BENZAMIDE	3	DB07800	-6.77189	0.1459	6.57403	480.933	5.61638	1801	4268	367	1600	1457.58	1508	1412.98	1412	NA	F10
(5,6-DIPHENYL-FURO[2,3-D]PYRIMIDIN-4-YLAMINO)-ACETIC	4	DB07654	-6.80613	0.54632	6.08638	345.402	5.61637	1750	1769	1125	1601	1536.66	1650	1515.79	1571	NA	CHEK1
7-(1,1-Dioxo-1h-Benzo[D]Isothiazol-3-Yloxymethyl)-2-(Oxalyl-Amino)-4,7-Dihydro-5h-Thieno[2,3-C]Pyran-3-Carboxylic-Acid	9	DB02827	-7.34693	0.12203	5.51618	466.449	5.61618	989	4351	2215	1602	1976.77	2413	2120.25	2507	NA	PTPN1
(2S)-2-(6-methoxynaphthalen-2-yl)propanoic-acid	1	DB00788	-6.54566	0.71902	4.99571	230.263	5.61591	2107	685	2933	1603	1613.99	1786	1617.67	1735	Naproxen is classified as a nonsteroidal anti-inflammatory dug (NSAID) and was initially approved for prescription use in 1976 and then for over-the-counter (OTC) use in 1994.[A178975]	PTGS2,PTGS1
Naproxen	1	DB00788	-6.54889	0.73112	4.98978	230.263	5.61591	2102	625	2945	1604	1578.34	1722	1569.88	1663	Naproxen is classified as a nonsteroidal anti-inflammatory dug (NSAID) and was initially approved for prescription use in 1976 and then for over-the-counter (OTC) use in 1994.[A178975]	PTGS2,PTGS1
RB106	0	DB02669	-7.0774	0.2081	5.69255	412.511	5.61547	1333	4001	1901	1605	2008.46	2464	2164.35	2589	NA	nprS,npr
Alpha-methylthiofentanyl	0	DB01470	-6.57577	0.38361	6.13049	356.535	5.61533	2069	2932	1022	1606	1776.36	2060	1837.07	2073	伪-methylthiofentanyl (or alpha-methylthiofentanyl) is an opioid analgesic that is an analog of fentanyl.	NA
7,9-Dihydro-1h-Purine-2,6,8(3h)-Trione	0	DB08844	-5.00579	0.59544	4.06089	168.112	5.61468	3577	1410	3762	1607	2349.87	3015	2667.18	3327	Uric acid is the last product of purine metabolism in humans. The formation of uric acid is through the enzyme xanthine oxidase, which oxidizes oxypurines. Normally a small amount of uric acid is present in the body, but when there is an excess amount in the blood, called hyperuricemia, this can lead to gout and formation of kidney stones. As a therapeutic agent, it is known that uric acid is inc…	NA
Alpha-L-Fucose	3	DB04473	-5.03111	0.4677	3.02714	164.157	5.61447	3566	2335	4390	1608	2768.88	3654	3318.77	4082	NA	Not-Available,env,IGHG1,Not-Available
S-METHYL-GLUTATHIONE	0	DB04701	-5.55814	0.33301	4.60613	321.355	5.61436	3171	3298	3302	1609	2730.2	3596	3256.43	4024	NA	GSTM2
(5S)-2-(cyclooctylamino)-5-methyl-5-propyl-1,3-thiazol-4(5H)-one	0	DB07866	-6.71725	0.61982	5.92736	282.453	5.6137	1880	1237	1447	1610	1525.65	1624	1498.53	1536	NA	HSD11B1
Dequadin	0	DB04209	-7.14505	0.31682	6.75889	456.678	5.61331	1246	3393	198	1611	1077.62	902	942.444	785	Dequalinium is a quaternary ammonium cation that contains two quaternary quinolinium units linked by an N-decylene chain. It is an antiseptic and disinfectant agent with a broad bactericidal and fungicidal activity. It is most commonly available as a dichloride salt but is available as other various salts as well. It is used in wound dressings and mouth infections and may also have antifungal act…	acrB,qacR
Ecabet	3	DB05265	-7.26753	0.35047	6.24097	380.506	5.61276	1095	3188	819	1612	1465.19	1523	1419.29	1426	Ecabet is a prescription eye drop for the treatment of dry eye syndrome. Ecabet represents a new class of molecules that increases the quantity and quality of mucin produced by conjunctival goblet cells and corneal epithelia. Mucin is a glycoprotein component of tear film that lubricates while retarding moisture loss from tear evaporation. Ecabet is currently marketed in Japan as an oral agent fo…	NOXO1,ureC
(Carboxyhydroxyamino)Ethanoic-Acid	4	DB02954	-3.64181	0.42823	3.11104	135.075	5.61253	4251	2631	4355	1613	2977.2	3876	3652.02	4353	NA	purA,purA
5-[1-(4-methoxyphenyl)-1H-benzimidazol-6-yl]-1,3,4-oxadiazole-2(3H)-thione	0	DB07058	-7.29196	0.64075	6.28908	324.365	5.61231	1051	1109	750	1614	1089.87	921	956.163	794	NA	GSK3B
Heptanoic-Acid	0	DB02938	-4.138	0.5504	3.69982	130.187	5.61219	4074	1738	3990	1615	2598.99	3413	3045.66	3792	NA	PLA2G1B
4-CHLORO-8-METHYL-7-(3-METHYL-BUT-2-ENYL)-6,7,8,9-TETRAHYDRO-2H-2,7,9A-TRIAZA-BENZO[CD]AZULENE-1-THIONE	1	DB08598	-6.92231	0.17138	5.99699	321.877	5.61211	1578	4159	1311	1616	1931.01	2329	2049.11	2380	NA	gag-pol,gag-pol
Propafenone	3	DB01182	-5.90859	0.3512	5.54618	341.451	5.61194	2843	3182	2163	1617	2371.71	3061	2694.7	3363	An antiarrhythmia agent that is particularly effective in ventricular arrhythmias. It also has weak beta-blocking activity. The drug is generally well tolerated.	SCN5A,KCNH2
N-[[3-FLUORO-4-ETHOXY-PYRID-2-YL]ETHYL]-N'-[5-NITRILOMETHYL-PYRIDYL]-THIOUREA	1	DB07781	-5.69449	0.352	6.06992	345.403	5.61122	3046	3177	1165	1618	2066.63	2557	2242.29	2702	NA	gag-pol
Plerixafor	1	DB06809	-8.34229	0.30538	5.61213	502.796	5.61068	253	3471	2054	1619	1307.24	1255	1217.28	1121	Plerixafor is a hematopoietic stem cell mobilizer. It is used to stimulate the release of stem cells from the bone marrow into the blood in patients with non-Hodgkin lymphoma and multiple myeloma for the purpose of stimulating the immune system. These stem cells are then collected and used in autologous stem cell transplantation to replace blood-forming cells that were destroyed by chemotherapy. …	CXCR4
1,3-DIPHENYLUREA	0	DB07496	-5.77802	0.64002	4.78539	212.252	5.60997	2975	1116	3147	1620	2028.34	2491	2186.16	2621	NA	ephB
Brequinar-Analog	0	DB03480	-8.7189	0.4165	6.07837	357.384	5.60991	129	2720	1149	1621	899.115	628	738.742	530	NA	DHODH
Ximelagatran	2	DB04898	-6.52372	0.14853	5.76143	473.574	5.60972	2133	4257	1765	1622	2257.99	2870	2521.23	3105	Ximelagatran is an anticoagulant intended to become a replacement for warfarin by overcoming the dietary restrictions, drug interaction, and monitoring issues associated with the former. In 2006, its manufacturer AstraZeneca announced that it would not attempt to market ximelagatran after reports of hepatotoxicity (liver damage) during trials, and to discontinue its distribution in countries wher…	F2
4-Methylumbelliferyl-Alpha-D-Glucose	9	DB13177	-6.82644	0.33986	5.01874	338.312	5.60958	1716	3259	2915	1623	2267.98	2882	2535.6	3126	NA	NA
Cefotaxime	0	DB00493	-6.73017	0.2391	5.58381	455.474	5.60936	1862	3861	2102	1624	2225.74	2818	2472.32	3031	Cefotaxime is a third-generation cephalosporin antibiotic. Like other third-generation cephalosporins, it has broad spectrum activity against Gram positive and Gram negative bacteria. In most cases, it is considered to be equivalent to ceftriaxone in terms of safety and efficacy. Cefotaxime sodium is marketed under various trade names including Claforan (Sanofi-Aventis).	pbp1b,pbp2a,pbpC,pbpA,penA
CP-526423	5	DB02089	-6.38556	0.75793	6.3053	503.386	5.6086	2305	490	720	1625	1072.17	891	933.397	777	NA	PYGL
4-({4-[(4-AMINOBUT-2-YNYL)OXY]PHENYL}SULFONYL)-N-HYDROXY-2,2-DIMETHYLTHIOMORPHOLINE-3-CARBOXAMIDE	7	DB07121	-6.55093	0.31862	5.97321	413.521	5.6081	2097	3381	1359	1626	1989.51	2430	2127.92	2523	NA	ADAM17
N-Methylnaloxonium	9	DB04509	-8.36316	0.47292	5.68457	342.415	5.60757	246	2298	1917	1627	1152.32	1009	1027.15	882	NA	CES1
Sp-722	0	DB04503	-7.10209	0.17281	5.45991	428.419	5.60752	1295	4151	2296	1628	2117.2	2644	2310.99	2801	NA	thyA
N-Alpha-(2-Naphthylsulfonyl)-N(3-Amidino-L-Phenylalaninyl)Isopipecolinic-Acid-Methyl-Ester	0	DB01745	-8.63747	0.43379	6.87458	522.627	5.60566	158	2583	130	1629	542.202	238	375.758	173	NA	PRSS1
N-(3-chlorophenyl)-N-methyl-2-oxo-3-[(3,4,5-trimethyl-1H-pyrrol-2-yl)methyl]-2H-indole-5-sulfonamide	1	DB07369	-8.06481	0.38984	6.86172	455.967	5.6056	390	2893	136	1630	707.188	409	535.366	311	NA	MET
N-[(1S)-2-{[(1R)-2-(benzyloxy)-1-cyano-1-methylethyl]amino}-1-(cyclohexylmethyl)-2-oxoethyl]morpholine-4-carboxamide	2	DB08755	-6.71532	0.59322	6.70101	456.587	5.60504	1881	1428	248	1631	1020.95	797	873.352	691	NA	CTSS
R048-8071	0	DB02016	-5.92857	0.24877	6.18877	448.376	5.60475	2831	3805	908	1632	1998.83	2444	2138.59	2548	NA	LSS
6-ETHYL-5-[(2S)-1-(3-METHOXYPROPYL)-2-PHENYL-1,2,3,4-TETRAHYDROQUINOLIN-7-YL]PYRIMIDINE-2,4-DIAMINE	0	DB08099	-8.17955	0.53202	6.95811	417.557	5.60455	317	1858	89	1633	540.904	237	374.253	171	6-ethyl-5-[(2s)-1-(3-methoxypropyl)-2-phenyl-1,2,3,4-tetrahydroquinolin-7-yl]pyrimidine-2,4-diamine is a solid. This compound belongs to the phenylquinolines. These are heterocyclic compounds containing a quinoline moiety substituted with a phenyl group. This substance targets the protein renin.	REN
4-chloro-N-(3-methoxypropyl)-N-[(3S)-1-(2-phenylethyl)piperidin-3-yl]benzamide	6	DB08344	-6.33548	0.26472	6.06253	414.977	5.6044	2364	3725	1184	1634	2031.63	2498	2184.62	2617	NA	glmU
4-{2-[(7-amino-2-furan-2-yl[1,2,4]triazolo[1,5-a][1,3,5]triazin-5-yl)amino]ethyl}phenol	5	DB08770	-6.53702	0.6622	6.18846	337.343	5.60427	2119	998	910	1635	1331.85	1283	1243.85	1159	NA	ADORA2A
Sufentanil	2	DB00708	-6.14707	0.35847	6.58583	386.561	5.60403	2583	3124	350	1636	1466.13	1524	1413.52	1413	"Sufentanil is an opioid analgesic that is used as an adjunct in anesthesia, in balanced anesthesia, and as a primary anesthetic agent. It is administered by the intravenous, epidural and sublingual routes.	OPRM1,OPRD1,OPRK1
GENTAMICIN-C1A	5	DB04729	-7.39123	0.17983	4.76332	449.549	5.60397	949	4127	3163	1637	2122.08	2652	2313.84	2803	NA	rpsL,Not-Available
Mycophenolate-mofetil	1	DB00688	-6.94728	0.13177	5.63881	433.501	5.60328	1546	4312	2012	1638	2165	2723	2375.96	2892	Mycophenolate mofetil is the 2-morpholinoethyl ester of mycophenolic acid (MPA), an immunosuppressive agent, inosine monophosphate dehydrogenase (IMPDH) inhibitor.	IMPDH1,IMPDH2
5-(4-Morpholin-4-Yl-Phenylsulfanyl)-2,4-Quinazolinediamine	0	DB02001	-7.81532	0.18014	5.92697	353.451	5.60262	549	4126	1450	1639	1523.22	1619	1486.47	1518	NA	DFR1,DHFRL1
Prasugrel	0	DB06209	-7.06858	0.26478	6.08539	373.449	5.60252	1345	3723	1127	1640	1744.2	2008	1780.38	1970	Prasugrel, a thienopyridine derivative, is a platelet activation and aggregation inhibitor structurally and pharmacologically related to clopidogrel and ticlopidine. Similar to clopidogrel, prasugrel is a prodrug that requires enzymatic transformation in the liver to its active metabolite, R-138727. R-138727 irreversibly binds to P2Y12 type ADP receptors on platelets thus preventing activation of…	P2RY12
(1R)-N,6-DIHYDROXY-7-METHOXY-2-[(4-METHOXYPHENYL)SULFONYL]-1,2,3,4-TETRAHYDROISOQUINOLINE-1-CARBOXAMIDE	0	DB08170	-7.07826	0.27283	5.94845	408.432	5.60252	1330	3669	1409	1641	1832.76	2164	1901.53	2163	NA	MMP7
7-{2,6-DICHLORO-4-[3-(2-CHLORO-BENZOYL)-UREIDO]-PHENOXY}-HEPTANOIC-ACID	1	DB04642	-7.04261	0.57302	6.29387	487.767	5.60237	1390	1577	743	1642	1278.8	1205	1176.55	1058	NA	PYGM
6-[1-(3,5,5,8,8-Pentamethyl-5,6,7,8-Tetrahydronaphthalen-2-Yl)Cyclopropyl]Pyridine-3-Carboxylic-Acid	4	DB01941	-7.60728	0.17348	6.34719	363.501	5.60132	742	4149	657	1643	1350.17	1314	1264.65	1194	NA	RXRB
[[(3R,4R,5S,6R)-3-(butanoylamino)-4,5-dihydroxy-6-(hydroxymethyl)oxan-2-ylidene]amino]-N-phenylcarbamate	1	DB07432	-6.6556	0.20346	4.92664	381.385	5.60104	1962	4029	3015	1644	2501.91	3256	2877.8	3591	NA	nagZ,BT_4395
6-CHLORO-N-{(3S)-1-[(1S)-1-METHYL-2-(4-MORPHOLINYL)-2-OXO-ETHYL]-2-OXO-3-PYRROLIDINYL}-2-NAPHTHALENESULFONAMIDE	0	DB07847	-8.40708	0.44485	6.63549	465.959	5.60071	232	2499	301	1645	731.976	438	558.822	335	NA	F10
P-Hydroxybenzoic-Acid	2	DB04242	-4.69142	0.61172	3.2683	138.122	5.60051	3774	1290	4289	1646	2421.28	3134	2753.7	3443	NA	fcbC,pobA,ubiC,pobA
2-DEOXY-3,4-BIS-O-[3-(4-HYDROXYPHENYL)PROPANOYL]-L-THREO-PENTARIC-ACID	0	DB08322	-7.20848	0.1124	5.35141	456.403	5.60041	1165	4374	2462	1647	2132.05	2669	2323.62	2819	NA	PYGM
5-(5-(4-(5-HYDRO-4-METHYL-2-OXAZOLYL)PHENOXY)PENTYL)-3-METHYL-ISOXAZOLE	7	DB08724	-5.59634	0.44566	6.16368	328.412	5.60004	3137	2494	957	1648	1874.22	2233	1956.32	2257	5-(5-(4-(5-hydro-4-methyl-2-oxazolyl)phenoxy)pentyl)-3-methyl isoxazole is a solid. This compound belongs to the phenol ethers. These are aromatic compounds containing an ether group substituted with a benzene ring. This medication is known to target genome polyprotein.	Not-Available
4-acetamidobenzoic-acid	0	DB04500	-5.22478	0.34605	3.88732	179.175	5.59992	3419	3216	3889	1649	2897.8	3801	3496.91	4243	NA	NA
Tmr	5	DB03903	-6.47418	0.1781	6.33554	483.524	5.59938	2190	4134	673	1650	1780.65	2067	1826.46	2057	NA	ACTA1
N-[amino(imino)methyl]-2-[2-(2-chlorophenyl)-4-(4-propoxyphenyl)-3-thienyl]acetamide	0	DB07089	-7.19055	0.4405	6.69302	427.957	5.59907	1187	2533	254	1651	1059.66	867	914.057	751	NA	BACE1
[truncated: 2,846 more rows]

## Sheet: Top 100
Name	Index	DrugBank ID	Vina Affinity	CNNscore	CNNaffinity	MW	pangu_affinity	Vina Affinity_idity_id	CNNscore_id	CNNaffinity_id	pangu_id	rank_prod_id	with_pangu_id	without_pandu	without_pandu_id	Description	Target
[truncated: 100 more rows]
