# Supplementary material for: Deep Learning Paradigm for Precision Lung Cancer Therapy with AI-Driven Genotype-Phenotype Mining and Patient-Derived Organoid Validation
Source: Research Square preprint supplement (doi:10.21203/rs.3.rs-8251435/v1), 2025-12-23
Supplement: Supplementary file 4 [file 914acff9ee26e593bac01d36.xlsx]

## Sheet: Testing set.res
Supplementary table 4.Integrated Computational-Experimental Validation of Deep Learning Model
Patient sample ID	No. of LCO	Compound_SMILES	Experiment_Normalized	Model_Predicted
TTH0029	TOH0029	COC1=C(OCCCN2CCOCC2)C=C2C(NC3=CC(Cl)=C(F)C=C3)=NC=NC2=C1	0.697516	0.596693
TTH0029	TOH0029	COC1=C(NC(=O)\C=C\CN2CCCCC2)C=C2C(NC3=CC(Cl)=C(F)C=C3)=NC=NC2=C1	0.648479	0.956597
TTH0029	TOH0029	COC1=C(NC2=NC=CC(=N2)C2=CN(C)C3=C2C=CC=C3)C=C(NC(=O)C=C)C(=C1)N(C)CCN(C)C	0.709519	0.364572
TTH0029	TOH0029	CCC1=CC2=C(C=C1N1CCC(CC1)N1CCOCC1)C(C)(C)C1=C(C3=CC=C(C=C3N1)C#N)C2=O	0.153448	0.509649
TTH0029	TOH0029	COC1=CC(=CC=C1NC1=NC=C(Cl)C(NC2=CC=CC=C2P(C)(C)=O)=N1)N1CCC(CC1)N1CCN(C)CC1	1	1.05371
TTH0029	TOH0029	C[C@@H](OC1=CC(=CN=C1N)C1=CN(N=C1)C1CCNCC1)C1=C(Cl)C=CC(F)=C1Cl	0.999466	1.04992
TTH0029	TOH0029	CN1CCN(CC1)C1=CC=C(C(=O)NC2=NNC3=CC=C(CC4=CC(F)=CC(F)=C4)C=C23)C(NC2CCOCC2)=C1	0.989646	1.0214
TTH0029	TOH0029	O[C@H]1CCN(C1)C(=O)NC1=C2N=C(C=CN2N=C1)N1CCC[C@@H]1C1=C(F)C=CC(F)=C1	0.0291913	0.488379
TTH0029	TOH0029	C[C@@H](OC1=CC(=NN=C1N)C(=O)NC1=CC=C(C=C1)C(=O)N1C[C@H](C)N[C@H](C)C1)C1=C(Cl)C=CC(F)=C1Cl	0.965028	1.01572
TTH0029	TOH0029	CC(C)(C)C1=NC(=C(S1)C1=NC(N)=NC=C1)C1=C(F)C(NS(=O)(=O)C2=C(F)C=CC=C2F)=CC=C1	0.381195	0.463273
TTH0029	TOH0029	C[C@H](N1N=NC2=NC=C(N=C12)C1=CN(C)N=C1)C1=CN2C=CN=C2C=C1	0.071901	0.153357
TTH0029	TOH0029	COC1=NC=C(CN2C3CC2CN(C3)C2=CC=C(C=N2)C2=CC(OCC(C)(C)O)=CN3N=CC(C#N)=C23)C=C1	0.42622	0.620816
TTH0029	TOH0029	COC1=C(OCC2CCN(C)CC2)C=C2N=CN=C(NC3=C(F)C=C(Br)C=C3)C2=C1	0.98777	0.794127
TTH0029	TOH0029	CC(C)C1=NC=CC(C)=C1N1C(=O)N=C(N2CCN(C[C@@H]2C)C(=O)C=C)C2=CC(F)=C(N=C12)C1=C(O)C=CC=C1F	0.04087	-0.129845
TTH0029	TOH0029	O=C(NC1=CC=C(C=C1)C1(CCCC1)C#N)C1=CC=CN=C1NCC1=CC=NC=C1	0.229277	0.478457
TTH0029	TOH0029	CN(C)C\C=C\C(=O)NC1=C(O[C@H]2CCOC2)C=C2N=CN=C(NC3=CC(Cl)=C(F)C=C3)C2=C1	0.634482	0.805842
TTH0029	TOH0029	COCCOC1=CC2=C(C=C1OCCOC)C(NC1=CC(=CC=C1)C#C)=NC=N2	0.682121	0.750541
TTH0029	TOH0029	[H][N]([H])([H])[Pt](Cl)(Cl)[N]([H])([H])[H]	0.673482	0.554552
TTH0029	TOH0029	NC1=NC(=O)N(C=C1)[C@@H]1O[C@H](CO)[C@@H](O)C1(F)F	0.134584	0.125777
TTH0029	TOH0029	[H][C@]12[C@H](OC(=O)C3=CC=CC=C3)[C@]3(O)C[C@H](OC(=O)[C@H](O)[C@@H](NC(=O)C4=CC=CC=C4)C4=CC=CC=C4)C(C)=C([C@@H](OC(C)=O)C(=O)[C@]1(C)[C@@H](O)C[C@H]1OC[C@@]21OC(C)=O)C3(C)C	0.887302	1.03832
TTH0029	TOH0029	NC(=O)N(C1=CC=C(C(N)=O)C(=N1)C1=CC=C(F)C=C1F)C1=C(F)C=CC=C1F	0.179949	0.000528239
TTH0029	TOH0029	CN(C)CCNS(=O)(=O)CC1=CC(NC2=NC(OC3=CC4=C(NC(C)=C4)C=C3)=CC=N2)=CC=C1	0.490038	0.796294
TTH0029	TOH0029	CC1=CN(C=N1)C1=CC(NC(=O)C2=CC=C(C)C(NC3=NC=CC(=N3)C3=CN=CC=C3)=C2)=CC(=C1)C(F)(F)F	0.418857	-0.119808
TTH0029	TOH0029	NC1(CCN(CC1)C1=C2C=CNC2=NC=N1)C(=O)N[C@@H](CCO)C1=CC=C(Cl)C=C1	0.832485	0.814005
TTL0012	TOL0012	COC1=C(OCCCN2CCOCC2)C=C2C(NC3=CC(Cl)=C(F)C=C3)=NC=NC2=C1	0.760249	0.67862
TTL0012	TOL0012	COC1=C(NC(=O)\C=C\CN2CCCCC2)C=C2C(NC3=CC(Cl)=C(F)C=C3)=NC=NC2=C1	0.819846	0.974306
TTL0012	TOL0012	COC1=C(NC2=NC=CC(=N2)C2=CN(C)C3=C2C=CC=C3)C=C(NC(=O)C=C)C(=C1)N(C)CCN(C)C	0.767709	0.540313
TTL0012	TOL0012	CCC1=CC2=C(C=C1N1CCC(CC1)N1CCOCC1)C(C)(C)C1=C(C3=CC=C(C=C3N1)C#N)C2=O	0.38189	0.586961
TTL0012	TOL0012	COC1=CC(=CC=C1NC1=NC=C(Cl)C(NC2=CC=CC=C2P(C)(C)=O)=N1)N1CCC(CC1)N1CCN(C)CC1	0.994198	1.05123
TTL0012	TOL0012	C[C@@H](OC1=CC(=CN=C1N)C1=CN(N=C1)C1CCNCC1)C1=C(Cl)C=CC(F)=C1Cl	1	1.04665
TTL0012	TOL0012	CN1CCN(CC1)C1=CC=C(C(=O)NC2=NNC3=CC=C(CC4=CC(F)=CC(F)=C4)C=C23)C(NC2CCOCC2)=C1	1	1.01816
TTL0012	TOL0012	O[C@H]1CCN(C1)C(=O)NC1=C2N=C(C=CN2N=C1)N1CCC[C@@H]1C1=C(F)C=CC(F)=C1	0.251968	0.599242
TTL0012	TOL0012	C[C@@H](OC1=CC(=NN=C1N)C(=O)NC1=CC=C(C=C1)C(=O)N1C[C@H](C)N[C@H](C)C1)C1=C(Cl)C=CC(F)=C1Cl	0.962593	1.00794
TTL0012	TOL0012	CC(C)(C)C1=NC(=C(S1)C1=NC(N)=NC=C1)C1=C(F)C(NS(=O)(=O)C2=C(F)C=CC=C2F)=CC=C1	0.747966	0.594491
TTL0012	TOL0012	C[C@H](N1N=NC2=NC=C(N=C12)C1=CN(C)N=C1)C1=CN2C=CN=C2C=C1	0.492955	0.467607
TTL0012	TOL0012	COC1=NC=C(CN2C3CC2CN(C3)C2=CC=C(C=N2)C2=CC(OCC(C)(C)O)=CN3N=CC(C#N)=C23)C=C1	0.649019	0.700957
TTL0012	TOL0012	COC1=C(OCC2CCN(C)CC2)C=C2N=CN=C(NC3=C(F)C=C(Br)C=C3)C2=C1	0.983729	0.829751
TTL0012	TOL0012	CC(C)C1=NC=CC(C)=C1N1C(=O)N=C(N2CCN(C[C@@H]2C)C(=O)C=C)C2=CC(F)=C(N=C12)C1=C(O)C=CC=C1F	0.280874	0.399476
TTL0012	TOL0012	O=C(NC1=CC=C(C=C1)C1(CCCC1)C#N)C1=CC=CN=C1NCC1=CC=NC=C1	0.649452	0.598203
TTL0012	TOL0012	CN(C)C\C=C\C(=O)NC1=C(O[C@H]2CCOC2)C=C2N=CN=C(NC3=CC(Cl)=C(F)C=C3)C2=C1	0.771397	0.851986
TTL0012	TOL0012	COCCOC1=CC2=C(C=C1OCCOC)C(NC1=CC(=CC=C1)C#C)=NC=N2	0.782492	0.796811
TTL0012	TOL0012	[H][N]([H])([H])[Pt](Cl)(Cl)[N]([H])([H])[H]	0.61368	0.870299
TTL0012	TOL0012	NC1=NC(=O)N(C=C1)[C@@H]1O[C@H](CO)[C@@H](O)C1(F)F	0.447044	0.530158
TTL0012	TOL0012	[H][C@]12[C@H](OC(=O)C3=CC=CC=C3)[C@]3(O)C[C@H](OC(=O)[C@H](O)[C@@H](NC(=O)C4=CC=CC=C4)C4=CC=CC=C4)C(C)=C([C@@H](OC(C)=O)C(=O)[C@]1(C)[C@@H](O)C[C@H]1OC[C@@]21OC(C)=O)C3(C)C	0.89619	1.05377
TTL0012	TOL0012	NC(=O)N(C1=CC=C(C(N)=O)C(=N1)C1=CC=C(F)C=C1F)C1=C(F)C=CC=C1F	0.501883	0.459789
TTL0012	TOL0012	CN(C)CCNS(=O)(=O)CC1=CC(NC2=NC(OC3=CC4=C(NC(C)=C4)C=C3)=CC=N2)=CC=C1	0.653803	0.840601
TTL0012	TOL0012	CC1=CN(C=N1)C1=CC(NC(=O)C2=CC=C(C)C(NC3=NC=CC(=N3)C3=CN=CC=C3)=C2)=CC(=C1)C(F)(F)F	0.446428	0.405289
TTL0012	TOL0012	NC1(CCN(CC1)C1=C2C=CNC2=NC=N1)C(=O)N[C@@H](CCO)C1=CC=C(Cl)C=C1	0.916388	0.856631
TTV0021	TOV0021	COC1=C(OCCCN2CCOCC2)C=C2C(NC3=CC(Cl)=C(F)C=C3)=NC=NC2=C1	0.692656	0.431451
TTV0021	TOV0021	COC1=C(NC(=O)\C=C\CN2CCCCC2)C=C2C(NC3=CC(Cl)=C(F)C=C3)=NC=NC2=C1	0.853622	0.873585
TTV0021	TOV0021	COC1=C(NC2=NC=CC(=N2)C2=CN(C)C3=C2C=CC=C3)C=C(NC(=O)C=C)C(=C1)N(C)CCN(C)C	0.623239	0.16992
TTV0021	TOV0021	CCC1=CC2=C(C=C1N1CCC(CC1)N1CCOCC1)C(C)(C)C1=C(C3=CC=C(C=C3N1)C#N)C2=O	0.376761	0.378739
TTV0021	TOV0021	COC1=CC(=CC=C1NC1=NC=C(Cl)C(NC2=CC=CC=C2P(C)(C)=O)=N1)N1CCC(CC1)N1CCN(C)CC1	1	1.00414
TTV0021	TOV0021	C[C@@H](OC1=CC(=CN=C1N)C1=CN(N=C1)C1CCNCC1)C1=C(Cl)C=CC(F)=C1Cl	0.986419	0.98348
TTV0021	TOV0021	CN1CCN(CC1)C1=CC=C(C(=O)NC2=NNC3=CC=C(CC4=CC(F)=CC(F)=C4)C=C23)C(NC2CCOCC2)=C1	0.970322	0.973831
TTV0021	TOV0021	O[C@H]1CCN(C1)C(=O)NC1=C2N=C(C=CN2N=C1)N1CCC[C@@H]1C1=C(F)C=CC(F)=C1	0.530684	0.319608
TTV0021	TOV0021	C[C@@H](OC1=CC(=NN=C1N)C(=O)NC1=CC=C(C=C1)C(=O)N1C[C@H](C)N[C@H](C)C1)C1=C(Cl)C=CC(F)=C1Cl	0.881791	0.949815
TTV0021	TOV0021	CC(C)(C)C1=NC(=C(S1)C1=NC(N)=NC=C1)C1=C(F)C(NS(=O)(=O)C2=C(F)C=CC=C2F)=CC=C1	0.458249	0.300249
TTV0021	TOV0021	C[C@H](N1N=NC2=NC=C(N=C12)C1=CN(C)N=C1)C1=CN2C=CN=C2C=C1	0	-0.0958012
TTV0021	TOV0021	COC1=NC=C(CN2C3CC2CN(C3)C2=CC=C(C=N2)C2=CC(OCC(C)(C)O)=CN3N=CC(C#N)=C23)C=C1	0.53169	0.465478
TTV0021	TOV0021	COC1=C(OCC2CCN(C)CC2)C=C2N=CN=C(NC3=C(F)C=C(Br)C=C3)C2=C1	0.955231	0.685524
TTV0021	TOV0021	CC(C)C1=NC=CC(C)=C1N1C(=O)N=C(N2CCN(C[C@@H]2C)C(=O)C=C)C2=CC(F)=C(N=C12)C1=C(O)C=CC=C1F	0.407948	-0.574269
TTV0021	TOV0021	O=C(NC1=CC=C(C=C1)C1(CCCC1)C#N)C1=CC=CN=C1NCC1=CC=NC=C1	0.703722	0.316148
TTV0021	TOV0021	CN(C)C\C=C\C(=O)NC1=C(O[C@H]2CCOC2)C=C2N=CN=C(NC3=CC(Cl)=C(F)C=C3)C2=C1	0.543763	0.699586
TTV0021	TOV0021	COCCOC1=CC2=C(C=C1OCCOC)C(NC1=CC(=CC=C1)C#C)=NC=N2	0.450201	0.614892
TTV0021	TOV0021	[H][N]([H])([H])[Pt](Cl)(Cl)[N]([H])([H])[H]	0.131288	0.227593
TTV0021	TOV0021	NC1=NC(=O)N(C=C1)[C@@H]1O[C@H](CO)[C@@H](O)C1(F)F	0.467304	-0.201121
TTV0021	TOV0021	[H][C@]12[C@H](OC(=O)C3=CC=CC=C3)[C@]3(O)C[C@H](OC(=O)[C@H](O)[C@@H](NC(=O)C4=CC=CC=C4)C4=CC=CC=C4)C(C)=C([C@@H](OC(C)=O)C(=O)[C@]1(C)[C@@H](O)C[C@H]1OC[C@@]21OC(C)=O)C3(C)C	0.897887	0.998439
TTV0021	TOV0021	NC(=O)N(C1=CC=C(C(N)=O)C(=N1)C1=CC=C(F)C=C1F)C1=C(F)C=CC=C1F	0.542757	-0.400022
TTV0021	TOV0021	CN(C)CCNS(=O)(=O)CC1=CC(NC2=NC(OC3=CC4=C(NC(C)=C4)C=C3)=CC=N2)=CC=C1	0.811368	0.689612
TTV0021	TOV0021	CC1=CN(C=N1)C1=CC(NC(=O)C2=CC=C(C)C(NC3=NC=CC(=N3)C3=CN=CC=C3)=C2)=CC(=C1)C(F)(F)F	0	-0.559258
TTV0021	TOV0021	NC1(CCN(CC1)C1=C2C=CNC2=NC=N1)C(=O)N[C@@H](CCO)C1=CC=C(Cl)C=C1	0.725855	0.68567
TTH0043	TOH0043	COC1=C(OCCCN2CCOCC2)C=C2C(NC3=CC(Cl)=C(F)C=C3)=NC=NC2=C1	0	-0.0903847
TTH0043	TOH0043	COC1=C(NC(=O)\C=C\CN2CCCCC2)C=C2C(NC3=CC(Cl)=C(F)C=C3)=NC=NC2=C1	0.785714	0.481327
TTH0043	TOH0043	COC1=C(NC2=NC=CC(=N2)C2=CN(C)C3=C2C=CC=C3)C=C(NC(=O)C=C)C(=C1)N(C)CCN(C)C	0.646718	-0.360852
TTH0043	TOH0043	CCC1=CC2=C(C=C1N1CCC(CC1)N1CCOCC1)C(C)(C)C1=C(C3=CC=C(C=C3N1)C#N)C2=O	0	-0.161577
TTH0043	TOH0043	COC1=CC(=CC=C1NC1=NC=C(Cl)C(NC2=CC=CC=C2P(C)(C)=O)=N1)N1CCC(CC1)N1CCN(C)CC1	0.975386	0.681151
TTH0043	TOH0043	C[C@@H](OC1=CC(=CN=C1N)C1=CN(N=C1)C1CCNCC1)C1=C(Cl)C=CC(F)=C1Cl	1	0.648467
TTH0043	TOH0043	CN1CCN(CC1)C1=CC=C(C(=O)NC2=NNC3=CC=C(CC4=CC(F)=CC(F)=C4)C=C23)C(NC2CCOCC2)=C1	0.985521	0.623196
TTH0043	TOH0043	O[C@H]1CCN(C1)C(=O)NC1=C2N=C(C=CN2N=C1)N1CCC[C@@H]1C1=C(F)C=CC(F)=C1	0.239141	-0.221504
TTH0043	TOH0043	C[C@@H](OC1=CC(=NN=C1N)C(=O)NC1=CC=C(C=C1)C(=O)N1C[C@H](C)N[C@H](C)C1)C1=C(Cl)C=CC(F)=C1Cl	0	0.595632
TTH0043	TOH0043	CC(C)(C)C1=NC(=C(S1)C1=NC(N)=NC=C1)C1=C(F)C(NS(=O)(=O)C2=C(F)C=CC=C2F)=CC=C1	0	-0.248287
TTH0043	TOH0043	C[C@H](N1N=NC2=NC=C(N=C12)C1=CN(C)N=C1)C1=CN2C=CN=C2C=C1	0.591699	-0.694595
TTH0043	TOH0043	COC1=C(OCC2CCN(C)CC2)C=C2N=CN=C(NC3=C(F)C=C(Br)C=C3)C2=C1	0.267375	0.244692
TTH0043	TOH0043	CC(C)C1=NC=CC(C)=C1N1C(=O)N=C(N2CCN(C[C@@H]2C)C(=O)C=C)C2=CC(F)=C(N=C12)C1=C(O)C=CC=C1F	0.651062	-1.33995
TTH0043	TOH0043	O=C(NC1=CC=C(C=C1)C1(CCCC1)C#N)C1=CC=CN=C1NCC1=CC=NC=C1	0.849421	-0.205699
TTH0043	TOH0043	CN(C)C\C=C\C(=O)NC1=C(O[C@H]2CCOC2)C=C2N=CN=C(NC3=CC(Cl)=C(F)C=C3)C2=C1	0.543919	0.244469
TTH0043	TOH0043	COCCOC1=CC2=C(C=C1OCCOC)C(NC1=CC(=CC=C1)C#C)=NC=N2	0	0.197863
TTH0043	TOH0043	[H][N]([H])([H])[Pt](Cl)(Cl)[N]([H])([H])[H]	0	-0.563836
TTH0043	TOH0043	NC1=NC(=O)N(C=C1)[C@@H]1O[C@H](CO)[C@@H](O)C1(F)F	0.0111004	-0.927902
TTH0043	TOH0043	[H][C@]12[C@H](OC(=O)C3=CC=CC=C3)[C@]3(O)C[C@H](OC(=O)[C@H](O)[C@@H](NC(=O)C4=CC=CC=C4)C4=CC=CC=C4)C(C)=C([C@@H](OC(C)=O)C(=O)[C@]1(C)[C@@H](O)C[C@H]1OC[C@@]21OC(C)=O)C3(C)C	0.819739	0.711345
TTH0043	TOH0043	CN(C)CCNS(=O)(=O)CC1=CC(NC2=NC(OC3=CC4=C(NC(C)=C4)C=C3)=CC=N2)=CC=C1	0.620656	0.240626
