# Supplementary material for: Deep Learning Paradigm for Precision Lung Cancer Therapy with AI-Driven Genotype-Phenotype Mining and Patient-Derived Organoid Validation
Source: Research Square preprint supplement (doi:10.21203/rs.3.rs-8251435/v1), 2025-12-23
Supplement: Supplementary file 5 [file a12a735b309c07b7fdf014e6.xlsx]

## Sheet: Validation of drug response fea
Supplementary table 5. Validation of drug response feature in clinical data
Case	Patient sample ID	Sex	Age	Pathelogical type	Stage/TNM stage	Differentiation	WGS/WES/RNA-seq	Clinical treatment	Clinica_Smiles_Used	PFS_Time(Days)	Group	Predicted_23model	Groups_23model	Event	Group
1	P01	Famale	66	Invasive non-mucinous adenocarcinoma		Moderate	WGS	Pemetrexed + carboplatin	C1CC2(C1)C(=O)O[Pt-2]([NH3+])([NH3+])OC2=O	1245	Live	0.593704	Low	0	Low
2	P02	Famale	68	Invasive non-mucinous adenocarcinoma		Poor-moderate	WGS	Pemetrexed + carboplatin → Almonertinib	CN(C)CCN(C)C1=CC(=C(C=C1NC(=O)C=C)NC2=NC=CC(=N2)C3=CN(C4=CC=CC=C43)C5CC5)OC	1239	Live	0.656286	High	0	High
3	P03	Famale	31	Invasive non-mucinous adenocarcinoma	IA2: T1b,N0,cM0	Well	WGS	Pemetrexed + carboplatin	C1CC2(C1)C(=O)O[Pt-2]([NH3+])([NH3+])OC2=O	471	Progress	0.582678	Low	1	Low
4	P04	Famale	50	Invasive mucinous adenocarcinoma	IIB: T2a,N1,cM0	Moderate	WGS	Pemetrexed + cisplatin → Osimertinib	CN1C=C(C2=CC=CC=C21)C3=NC(=NC=C3)NC4=C(C=C(C(=C4)NC(=O)C=C)N(C)CCN(C)C)OC	1208	Live	0.700038	High	0	High
5	P05	Famale	53	Invasive non-mucinous adenocarcinoma	IA2: T1b,N0,cM0	Upper lobe of right lung：Moderate；Lower lobe of right lung：Well	WGS	Almonertinib	CN(C)CCN(C)C1=CC(=C(C=C1NC(=O)C=C)NC2=NC=CC(=N2)C3=CN(C4=CC=CC=C43)C5CC5)OC	1169	Live	0.649967	High	0	High
6	P06	Male	71	Invasive non-mucinous adenocarcinoma	IIIA: T1b,N2,cM0	Poor	WGS	Pemetrexed + Nedaplatin → Almonertinib	CN(C)CCN(C)C1=CC(=C(C=C1NC(=O)C=C)NC2=NC=CC(=N2)C3=CN(C4=CC=CC=C43)C5CC5)OC	440	Progress	0.595209	Low	1	Low
7	P07	Famale	55	Invasive non-mucinous adenocarcinoma	IA1: mT1mi,N0,cM0	Well	WGS	Almonertinib Mesilate	CN(C)CCN(C)C1=CC(=C(C=C1NC(=O)C=C)NC2=NC=CC(=N2)C3=CN(C4=CC=CC=C43)C5CC5)OC	303	Progress	0.647161	High	1	High
8	P09	Famale	69	Adenocarcinoma	IIIA: T1b,N2,cM0	Moderate-poor	WGS	Nedaplatin;Pemetrexed +Avastin	[Pt+2].[N-H2].[N-H2].OCC(=O)O	249	Progress	0.601947	Low	1	Low
9	P11	Famale	68	Invasive non-mucinous adenocarcinoma	IA2: T1b,N0,cM0	Moderate	WGS	Glumetinib →Pemetrexed + carboplatin + Bevacizumab	C[C@H](N1N=NC2=NC=C(N=C12)C1=CN(C)N=C1)C1=CN2C=CN=C2C=C1	822	Progress	0.23258	Low	1	Low
10	P12	Male	75	Invasive non-mucinous adenocarcinoma		Poor	WGS	Pemetrexed + carboplatin	C1CC2(C1)C(=O)O[Pt-2]([NH3+])([NH3+])OC2=O	1091	Live	0.666759	High	0	High
11	P13	Male	67	Squamous cell carcinoma	IIB: T3,N0,cM0	Moderate-poor	WGS	Gemcitabine + Nedaplatin → Thymopentin	c1cn(c(=O)nc1N)[C@H]2C([C@@H]([C@H](O2)CO)O)(F)F	176	Progress	0.173839	Low	1	Low
12	P14	Male	61	Invasive non-mucinous adenocarcinoma	T2,Nx,cM0	Poor	WGS	Pemetrexed + Nedaplatin + Bevacizumab	[Pt+2].[N-H2].[N-H2].OCC(=O)O	115	Progress	0.525606	Low	1	Low
13	P16	Male	75	Squamous cell carcinoma	IIB	Moderate	WGS	Gemcitabine + cisplatin + Sintilimab	c1cn(c(=O)nc1N)[C@H]2C([C@@H]([C@H](O2)CO)O)(F)F	822	Death	0.269356	Low	1	Low
14	P20	Famale	70	Invasive non-mucinous adenocarcinoma		Moderate	WGS	Pemetrexed + carboplatin → Almonertinib	CN(C)CCN(C)C1=CC(=C(C=C1NC(=O)C=C)NC2=NC=CC(=N2)C3=CN(C4=CC=CC=C43)C5CC5)OC	1006	Live	0.638986	High	0	High
15	P21	Male	63	Invasive non-mucinous adenocarcinoma	IIB: T3,N0,cM0	Moderate	WGS	Pemetrexed + carboplatin	C1CC2(C1)C(=O)O[Pt-2]([NH3+])([NH3+])OC2=O	961	Live	0.622972	High	0	High
16	P22	Famale	64	Invasive non-mucinous adenocarcinoma		Poor	WGS	Almonertinib Mesilate	CN(C)CCN(C)C1=CC(=C(C=C1NC(=O)C=C)NC2=NC=CC(=N2)C3=CN(C4=CC=CC=C43)C5CC5)OC	942	Live	0.736231	High	0	High
17	P23	Famale	62	Invasive non-mucinous adenocarcinoma	IIIB: T3,N2,cM0	Moderate	WGS	Pemetrexed + carboplatin → Almonertinib	CN(C)CCN(C)C1=CC(=C(C=C1NC(=O)C=C)NC2=NC=CC(=N2)C3=CN(C4=CC=CC=C43)C5CC5)OC	941	Live	0.597266	Low	0	Low
18	P24	Male	50	Invasive non-mucinous adenocarcinoma		Moderate	WGS	Almonertinib Mesilate	CN(C)CCN(C)C1=CC(=C(C=C1NC(=O)C=C)NC2=NC=CC(=N2)C3=CN(C4=CC=CC=C43)C5CC5)OC	716	Progress	0.650436	High	1	High
19	P25	Famale	73	Invasive non-mucinous adenocarcinoma	IA3: T1c,N0,cM0	Poor	WGS	Osimertinib	CN1C=C(C2=CC=CC=C21)C3=NC(=NC=C3)NC4=C(C=C(C(=C4)NC(=O)C=C)N(C)CCN(C)C)OC	86	Live	0.746693	High	0	High
20	P26	Male	60	Invasive non-mucinous adenocarcinoma	IIA: T2b,N0,cM0	Moderate	WGS	Pemetrexed + carboplatin → Furmonertinib	C=CC(=O)Nc1cc(Nc2nccc(n2)c2cn(c3c2cccc3)C)c(nc1N(CCN(C)C)C)OCC(F)(F)F	818	Live	0.403936	Low	0	Low
21	P28	Male	75	Invasive non-mucinous adenocarcinoma	IIIA: T2b,N2,cM0	Poor	WGS	Pemetrexed + carboplatin → Dabrafenib + trametinib	CC(C)(C)C1=NC(=C(S1)C2=NC(=NC=C2)N)C3=C(C(=CC=C3)NS(=O)(=O)C4=C(C=CC=C4F)F)F	760	Live	0.238269	Low	0	Low
22	P29	Male	74	Squamous cell carcinoma	IIB	Well	WGS	Chemotherapy → Lcotinib → Anlotinib → Furmonertinib	C#CC1=CC(=CC=C1)NC2=NC=NC3=CC4=C(C=C32)OCCOCCOCCO4	929	Live	0.56078	Low	0	Low
23	P30	Male	68	Invasive non-mucinous adenocarcinoma	IIB	Moderate	WGS	Almonertinib	CN(C)CCN(C)C1=CC(=C(C=C1NC(=O)C=C)NC2=NC=CC(=N2)C3=CN(C4=CC=CC=C43)C5CC5)OC	924	Live	0.611348	High	0	High
24	P39	Male	58	Invasive non-mucinous adenocarcinoma	IIIA: T2b,N2,cM0	Poor	WES	Almonertinib	CN(C)CCN(C)C1=CC(=C(C=C1NC(=O)C=C)NC2=NC=CC(=N2)C3=CN(C4=CC=CC=C43)C5CC5)OC	708	Progress	0.752342	High	1	High
