# Supplementary material for: Deep Learning Paradigm for Precision Lung Cancer Therapy with AI-Driven Genotype-Phenotype Mining and Patient-Derived Organoid Validation
Source: Research Square preprint supplement (doi:10.21203/rs.3.rs-8251435/v1), 2025-12-23
Supplement: Supplementary file 6 [file adc11979767862098836a985.xlsx]

## Sheet: Pathological information of all
Supplementary table 1. Pathological information of all the resected samples
Case	Patient sample ID	No. of LCO	Sex	Age	Pathelogical type	Stage/TNM stage	Differentiation	WGS/WES/RNA-seq	Organoid drug sensitivity testing	Deep learning model construction
1	TTH0001	TOH0001	Famale	78	Invasive non-mucinous adenocarcinoma	ⅠA3: T1c,N0,cM0	Poor	/	/	/
2	TTH0002	TOH0002	Male	53	Invasive non-mucinous adenocarcinoma		Moderate	WES/RNA-seq	24 different compounds	Training Set and Testing Set
3	TTH0004	TOH0004	Famale	47	Invasive non-mucinous adenocarcinoma	ⅠA2: T1b,N0,cM0	Moderate	WES/RNA-seq	/	/
4	TTH0006	/	Male	75	Squamous cell carcinoma	ⅠA2: T1b,N0,cM0	Moderate-poor	/	/	/
5	TTH0007	/	Famale	75	Invasive non-mucinous adenocarcinoma	ⅠB: T2a,N0,cM0	Moderate	/	/	/
6	TTH0008	/	Famale	46	Invasive non-mucinous adenocarcinoma	ⅠB: T2a,N0,cM0	Poor	/	/	/
7	TTH0009	/	Famale	61	Invasive non-mucinous adenocarcinoma	ⅠA2: T1b,N0,cM0	Well	/	/	/
8	TTH0010	TOH0010	Male	53	Invasive non-mucinous adenocarcinoma	ⅠB: T2a,N0,cM0	Poor	WES/RNA-seq	24 different compounds	Training Set and Testing Set
9	TTH0011	/	Famale	69	Invasive non-mucinous adenocarcinoma	ⅠB: T2a,N0,cM0	Poor	/	/	/
10	TTH0012	/	Famale	69	Invasive non-mucinous adenocarcinoma	ⅠA3: T1c,N0,cM0	Well	/	/	/
11	TTH0013	TOH0013	Male	53	Invasive non-mucinous adenocarcinoma	ⅡB: T2b,N1,cM0	Poor	WES/RNA-seq	Osimertinib/Amonertinib(EGFR-M)	Clinical validation
12	TTH0014	TOH0014	Male	65	Invasive non-mucinous adenocarcinoma	ⅢA: T2a,N2,cM0	Moderate	WES/RNA-seq	/	/
13	TTH0015	/	Male	60	Invasive non-mucinous adenocarcinoma	ⅠB: T2a,N0,cM0	Poor	/	/	/
14	TTH0016	TOH0016	Male	80	Squamous cell carcinoma	ⅠA1: T1a,N0,cM0	Moderate	WES/RNA-seq	24 different compounds	Training Set and Testing Set
15	TTH0017	TOH0017	Male	53	Adenocarcinoma		Moderate	WES/RNA-seq	/	/
16	TTH0018	TOH0018	Male	87	Squamous cell carcinoma	ⅡB: T3,N0,cM0	Moderate-poor	WES/RNA-seq	/	/
17	TTH0019	TOH0019	Male	70	Squamous cell carcinoma	ⅠA3: T1c,N0,cM0	Moderate	WES/RNA-seq	24 different compounds	Training Set and Testing Set
18	TTH0020	/	Male	58	Invasive non-mucinous adenocarcinoma	ⅢA: T2a,N2,cM0	Poor	/	/	/
19	TTH0021	TOH0021	Male	58	Squamous cell carcinoma	ⅡB: T2a,N1,cM0	Moderate-poor	/	/	/
20	TTH0022	TOH0022	Male	71	Invasive non-mucinous adenocarcinoma	ⅢA: T2a,N2,cM0	Poor	WES/RNA-seq	24 different compounds	Training Set and Testing Set
21	TTH0023	/	Famale	73	Invasive non-mucinous adenocarcinoma		Moderate	/	/	/
22	TTH0024	/	Famale	82	Invasive non-mucinous adenocarcinoma	ⅢA: T2a,N2,cM0	Poor	/	/	/
23	TTH0025	TOH0025	Male	66	Invasive non-mucinous adenocarcinoma	ⅠB: T2a,N0,cM0	Poor	WES/RNA-seq	24 different compounds	/
24	TTH0026	TOH0026	Male	69	Squamous cell carcinoma	ⅠB: T2a,N0,cM0	Moderate	WES/RNA-seq	24 different compounds	Training Set and Testing Set
25	TTH0027	TOH0027	Male	72	Invasive non-mucinous adenocarcinoma	ⅡA: T2b,N0,cM0	Poor	WES/RNA-seq	24 different compounds	/
26	TTH0028	TOH0028	Male	64	Invasive non-mucinous adenocarcinoma	ⅠA2: T1b,N0,cM0	Poor	WES/RNA-seq	24 different compounds	/
27	TTH0029	TOH0029	Male	68	Adenocarcinoma	ⅠA2: T1b,N0,cM0	Poor	WES/RNA-seq	24 different compounds	Training Set and Testing Set; Model Verification
28	TTH0030	TOH0030	Male	59	Invasive non-mucinous adenocarcinoma	IVA: T3,N1b,M1a	Poor	WES/RNA-seq	/	/
29	TTH0031	TOH0031	Famale	54	Invasive non-mucinous adenocarcinoma	ⅠA2: T1b,N0,cM0	Well	/	/	/
30	TTH0032	TOH0032	Male	59	Invasive non-mucinous adenocarcinoma	ⅡB: T2a,N1,cM0	Poor	/	/	/
31	TTH0033	TOH0033	Male	67	Invasive non-mucinous adenocarcinoma	ⅠA2: T1b,N0,cM0	Moderate	WES	/	/
32	TTH0035	TOH0035	Male	74	Invasive non-mucinous adenocarcinoma	ⅢA: T1b,N2,cM0	Poor	WES/RNA-seq	24 different compounds	Training Set and Testing Set
33	TTH0036	TOH0036	Famale	54	Invasive non-mucinous adenocarcinoma	ⅡB: T2a,N1,cM0	Moderate	WES/RNA-seq	24 different compounds; Osimertinib/Amonertinib(EGFR-M)	Training Set and Testing Set
34	TTH0037	TOH0037	Male	78	Invasive non-mucinous adenocarcinoma	ⅢA3: T1c,N0,cM0	Poor	/	/	/
35	TTH0038	/	Male	69	Invasive non-mucinous adenocarcinoma	ⅠB: T2a,N0,cM0	Well	/	/	/
36	TTH0039	TOH0039	Male	58	Invasive non-mucinous adenocarcinoma	ⅢA: T2b,N2,cM0	Poor	WES	24 different compounds; Amonertinib(EGFR-M)	Training Set and Testing Set; Clinical validation
37	TTH0040	TOH0040	Famale	61	Invasive non-mucinous adenocarcinoma	ⅡB: T1b,N1,cM0	Poor	/	/	/
38	TTH0041	TOH0041	Male	72	Invasive non-mucinous adenocarcinoma	ⅠA3: T1c,N0,cM0	Poor	/	/	/
39	TTH0042	TOH0042	Male	69	Adenosquamous carcinoma		Poor	WES/RNA-seq	/	/
40	TTH0043	TOH0043	Male	68	Combined small-cell cancer（Approximately 30% are small cell carcinomas, and approximately 70% are poorly differentiated adenocarcinomas）	ⅠB: T2a,N0,cM0	Poor	WES	24 different compounds	Training Set and Testing Set; Model Verification
41	TTH0044	TOH0044	Male	77	Invasive mucinous adenocarcinoma	ⅢA: T3,N1,cM0	Not applicable	WES/RNA-seq	/	/
42	TTH0045	/	Famale	59	Invasive non-mucinous adenocarcinoma	ⅡA: T2b,N0,cM0	Poor	/	/	/
43	TTH0046	TOH0046	Famale	75	Invasive non-mucinous adenocarcinoma	ⅠA3: T1c,N0,cM0	Moderate	WES/RNA-seq	Amonertinib(EGFR-M)	/
44	TTH0048	TOH0048	Male	77	Invasive non-mucinous adenocarcinoma	ⅠA3: T1c,N0,cM0	Moderate	WES/RNA-seq	24 different compounds	Training Set and Testing Set
45	TTH0050	TOH0050	Male	72	Squamous cell carcinoma	T4,Nx,cM0	Moderate-poor	WES/RNA-seq	/	/
46	TTH0052	TOH0052	Male	69	Squamous cell carcinoma	ⅢA: T4,N0,cM0	Poor	WES/RNA-seq	/	/
47	TTH0053	TOH0053	Famale	58	Invasive non-mucinous adenocarcinoma	ⅠA3:T1c,N0,cM0	Moderate	WES/RNA-seq	/	/
48	TTH0055	/	Famale	73	Invasive non-mucinous adenocarcinoma	ⅢA: T2a,N2,cM0	Moderate	/	/	/
49	TTL0001	TOL0001	Famale	54	Invasive non-mucinous adenocarcinoma	ⅢA: T4,N0,cM0	Poor	WES/RNA-seq	Osimertinib/Amonertinib(EGFR-W)	Training Set and Testing Set
50	TTL0002	TOL0002	Famale	66	Invasive non-mucinous adenocarcinoma	ⅢA: T2b,N2,cM0	Poor	WES/RNA-seq	24 different compounds	Training Set and Testing Set
51	TTL0003	TOL0003	Male	69	Invasive non-mucinous adenocarcinoma		Poor	WES/RNA-seq	24 different compounds
52	TTL0004	TOL0004	Famale	82	Invasive non-mucinous adenocarcinoma	ⅠA2: T1b,N0,cM0	Moderate	WES/RNA-seq	24 different compounds	Training Set and Testing Set
53	TTL0007	TOL0007	Male	73	Squamous cell carcinoma	ⅡA: T2b,N0,cM0	Moderate-poor	WES/RNA-seq	24 different compounds	Training Set and Testing Set
54	TTL0008	TOL0008	Famale	59	Invasive mucinous adenocarcinoma	ⅢA: T1c,N2,cM0	Poor	WES/RNA-seq	Osimertinib/Amonertinib(EGFR-W)	/
55	TTL0010	TOL0010	Male	71	Invasive non-mucinous adenocarcinoma	ⅠB : T2a,N0,cM0	Moderate	WES	24 different compounds	Training Set and Testing Set
56	TTL0011	/	Male	69	Adenocarcinoma			/	/	/
57	TT L0012	TO L0012	Famale	61	Invasive mucinous adenocarcinoma	ⅠA2: T1b,N0,cM0	/	WES/RNA-seq	24 different compounds	Training Set and Testing Set; Model Verification
58	TT L0013	TOL0013	Male	71	Invasive non-mucinous adenocarcinoma	ⅠB : T2a,N0,cM0	Moderate	WES/RNA-seq	Osimertinib(EGFR-W)	/
59	TTL0014	TOL0014	Male	69	Invasive non-mucinous adenocarcinoma	ⅠB: T2a,N0,cM0	Moderate	/	/	/
60	TTL0015	TOL0015	Male	77	Invasive non-mucinous adenocarcinoma	ⅡB: T3,N0,cM0	Poor	/	Osimertinib/Amonertinib(EGFR-M)	/
61	TTL0011	TOL0011	Male	69	Squamous cell carcinoma	ⅠA2: T1b,N0,cM0	Poor	/	24 different compounds	/
62	TTV0017	TOV0017	Male	78	Pulmonary pleomorphic carcinoma	ⅡB: T3,N0,cM0	Poor	/	24 different compounds	Training Set and Testing Set
63	TTV0021	TOV0021	Male	60	Invasive non-mucinous adenocarcinoma	ⅢA: T2a,N2,cM0	Poor	WES/RNA-seq	24 different compounds	Training Set and Testing Set; Model Verification
64	TTV0032	TOV0032	Male	72	Invasive non-mucinous adenocarcinoma	ⅢA: pT1c,N2,cM0	Poor	WES	24 different compounds	Training Set and Testing Set
65	TTV0035	TOV0035	Famale	63	Invasive non-mucinous adenocarcinoma	ⅠA2: pT1b,N0,cM0	Well	WES/RNA-seq	24 different compounds	Training Set and Testing Set
66	TTV0043	TOV0043	Famale	69	Invasive mucinous adenocarcinoma	ⅡB: pT1c,N1,cM0	Moderate	/	24 different compounds	Training Set and Testing Set
67	TTV0082	TOV0082	Male	73	Squamous cell carcinoma	ⅠB: pT2a,N0,cM0	Moderate	/	24 different compounds	Training Set and Testing Set
68	TTV0126	TOV0126	Famale	61	Invasive non-mucinous adenocarcinoma	ⅢA: pT1c,N2,cM0	Poor	/	24 different compounds	Training Set and Testing Set
69	TTV0133	TOV0133	Famale	70	Invasive non-mucinous adenocarcinoma	ⅢA: pT1c,N2,cM0	Well	/	24 different compounds	Training Set and Testing Set
70	TTV0158	TOV0158	Famale	67	Adenocarcinoma	ⅠA2: pT1b,N0,cM0	Well	WES	24 different compounds	Training Set and Testing Set
71	TTV0159	TOV0159	Male	53	Adenocarcinoma	ⅢA: pT3，N1，Mx	Moderate	WES	24 different compounds	Training Set and Testing Set
72	TTV0162	TOV0162	Male	87	Squamous cell carcinoma	ⅠA1: T1mi,N0,cM0	Well	WES	24 different compounds	Training Set and Testing Set
73	TTV0163	TOV0163	Male	80	Squamous cell carcinoma	ⅠA1: pT1mi,N0,cM0	Well	WES	24 different compounds	Training Set and Testing Set
74	TTV0170	TOV0170	Male	60	Small cell lung cancer	ⅠA2: pT1b,N0,cM0	Moderate	WES	24 different compounds	Training Set and Testing Set
75	TTV0185	TOV0185	Famale	65	Adenocarcinoma			WES	24 different compounds	Training Set and Testing Set
