# Supplementary material for: Deep Learning Paradigm for Precision Lung Cancer Therapy with AI-Driven Genotype-Phenotype Mining and Patient-Derived Organoid Validation
Source: Research Square preprint supplement (doi:10.21203/rs.3.rs-8251435/v1), 2025-12-23
Supplement: Supplementary file 7 [file de0e9e433847afa2551e2f34.docx]

**Supporting information**

**Deep Learning Paradigm for Precision Lung Cancer Therapy with AI-Driven Genotype-Phenotype Mining and Patient-Derived Organoid Validation**

Mingyue Li1 #, Xiaoming Shi 2 #, Tianmu Hu1,7, Juan Zhang 4, Ziliang Ye 1, Yuhan Cai 1, Qiwei Li 5, Linchong Liu 2, Wenlong Yu 7, Jiajia Jing7, Qiuyin Zhang7, Juanjuan Li8, Xin Zhou1,7, Nan Qiao 6, Jun Bao1, Zaozao Chen 1*, Lili Xu 3*, Tao Wang 2*, Zhongze Gu1*

1.State Key Laboratory of Digital Medical Engineering, School of Biological Science and Medical Engineering, Southeast University, Nanjing 210096, China.

2. Nanjing Drum Tower Hospital Clinical College of Nanjing Medical University, Nanjing, Jiangsu, 210093, China.

3. Department of Medicinal Chemistry, School of Pharmacy, China Pharmaceutical University, China Pharmaceutical University, Nanjing Jiangsu 211198, China.

4. Key Laboratory of Environmental Medicine Engineering of Ministry of Education, School of Public Health, Southeast University, Nanjing 210096, China.

5. College of Optical and Electronic Technology, China Jiliang University, Hangzhou 310018, China.

6. Laboratory of Health Intelligence, Huawei Cloud Computing Technologies Co., Ltd, Guizhou, 550025, China.

7. Jiangsu Institute for Sport and Health (JISH), Nanjing 211100, China.

8. Jiangsu Avatarget Biotechnology Co., Ltd., Suzhou, Nanjing 210096, China.

*Correspondence: gu@seu.edu.cn

*Correspondence: wangtao@njglyy.com

*Correspondence: xulili@cpu.edu.cn*Correspondence: zaozaochen@seu.edu.cn


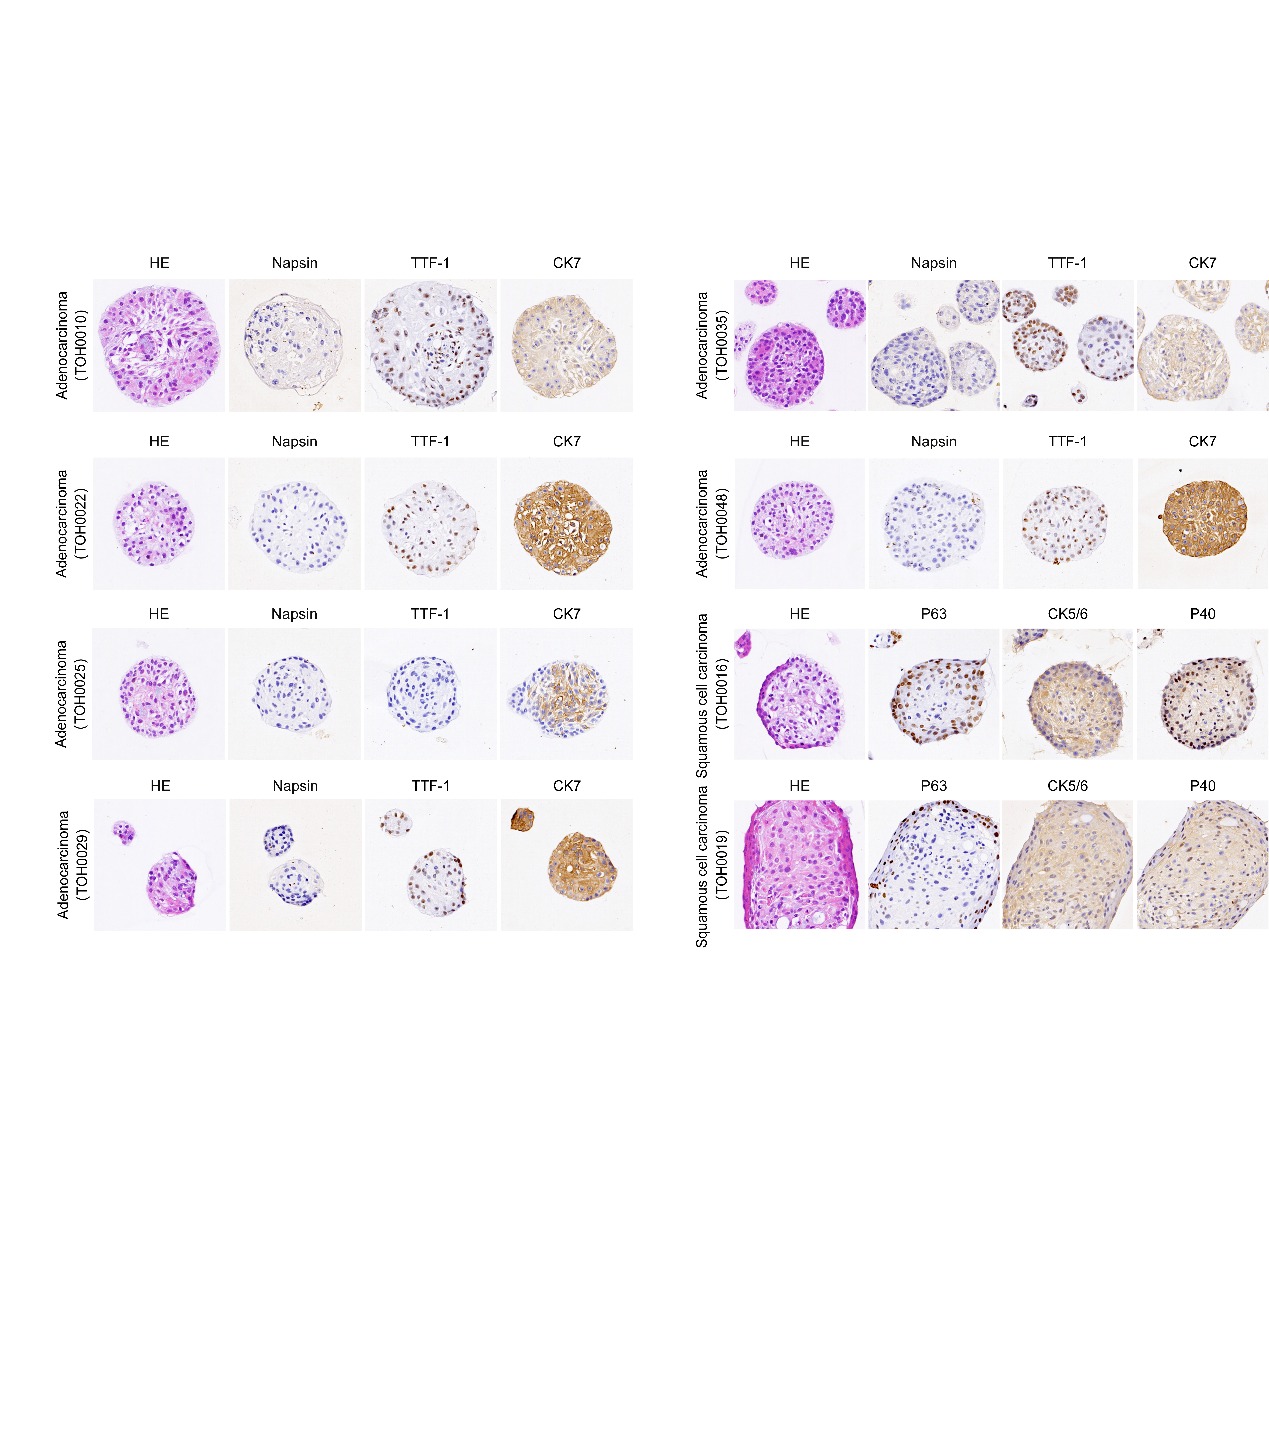


**Fig.S1 LCOs recapitulate the characteristics of the original tissues.** H&E-stained and IHC-stained images of LCOs and their original LC tissues. IHC staining of the adenocarcinoma-derived LCOs as well as the original tissue with classic subtype markers TTF-1 (left column), CK7 (middle column), and Napsin A (right column). IHC staining of CK5/6, P40, and P63 in squamous cell carcinoma.


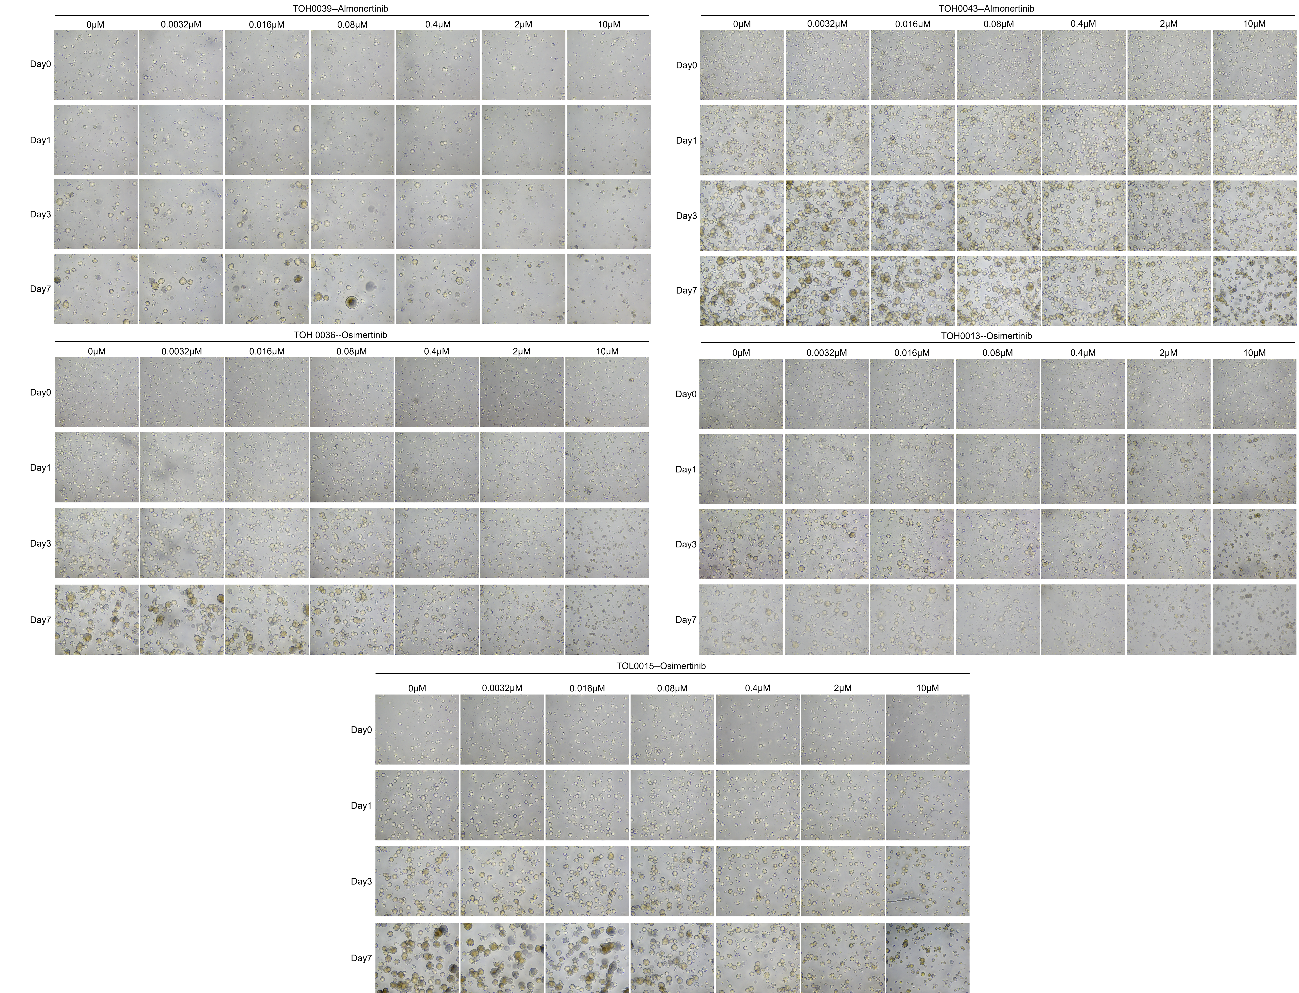


**Fig.S2 LCO drug sensitivity tests reﬂect the response of lung cancers to targeted drugs.** Bright-field images showing morphological responses of TOH0013, TOH0036, TOH0039, TOH0043, and TOL0015 organoids to TKI treatment at day 0, 1, 3, and 7. Scale bar, 100 μm.


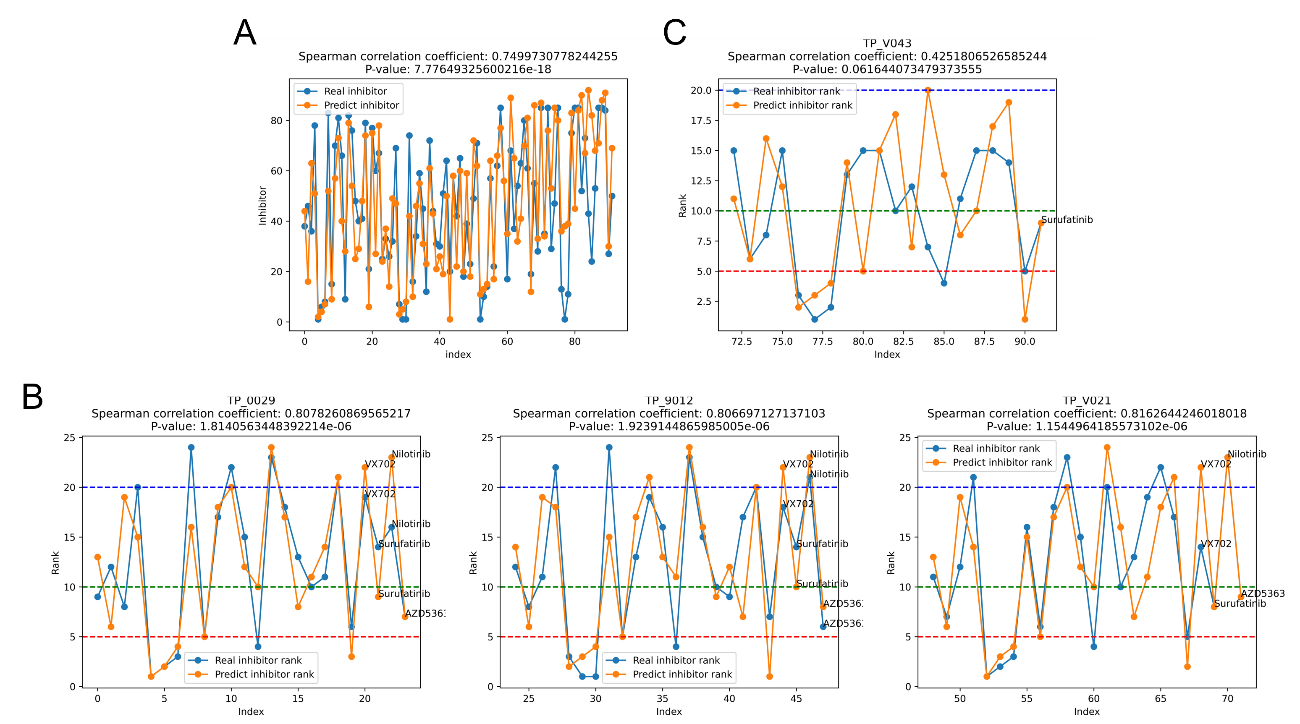


**Fig.S3 Deep learning-based prediction of drug response shows high concordance with patient-derived organoid assays. A.** Correlation between the predicted and experimentally measured tumour inhibition rates for a validation set of 24 compounds across 4 randomly selected patient-derived organoid (PDO) samples (Pearson correlation: 0.75, loss = 0.17). **B.** Concordance between model predictions and drug sensitivity assays in three independent non-small cell lung cancer (NSCLC) PDOs. High concordance values (Pearson correlation: 0.81 to 0.82) across these samples demonstrate the robustness of the model. **C.** Concordance in small cell lung cancer (SCLC) PDOs. A lower concordance value (Pearson correlation: 0.43) indicates the disease-specific predictive performance of the model.
